# Supplementary material for: Combinations of maternal-specific repressive epigenetic marks in the endosperm control seed dormancy
Source: eLife journal article supplement (doi:10.7554/elife.64593), 2021-08-24
Supplement: supp [file elife-64593-supp-v1.zip]

Archive with 27 entries (27 files):
- elife_poa_e64593_Transparent_Reporting_File.docx
- elife_poa_e64593_Figure_1_figure_supplement_1.pdf
- elife_poa_e64593_Figure_1_figure_supplement_2.pdf
- elife_poa_e64593_Figure_2_figure_supplement_1.pdf
- elife_poa_e64593_Figure_3_figure_supplement_1.pdf
- elife_poa_e64593_Figure_3_figure_supplement_2.pdf
- elife_poa_e64593_Figure_3_figure_supplement_3.pdf
- elife_poa_e64593_Figure_4_figure_supplement_1.pdf
- elife_poa_e64593_Figure_5_figure_supplement_1.pdf
- elife_poa_e64593_Figure_5_figure_supplement_2.pdf
- elife_poa_e64593_Figure_5_figure_supplement_3.pdf
- elife_poa_e64593_Figure_5_figure_supplement_4.pdf
- elife_poa_e64593_Figure_6_figure_supplement_1.pdf
- elife_poa_e64593_Figure_6_figure_supplement_2.pdf
- elife_poa_e64593_Figure_7_figure_supplement_1.pdf
- elife_poa_e64593_Figure_7_figure_supplement_2.pdf
- elife_poa_e64593_Figure_7_figure_supplement_3.pdf
- elife_poa_e64593_Figure_7_figure_supplement_4.pdf
- elife_poa_e64593_Figure_7_figure_supplement_5.pdf
- elife_poa_e64593_Figure_8_figure_supplement_1.pdf
- elife_poa_e64593_Figure_8_figure_supplement_2.pdf
- elife_poa_e64593_Figure_8_figure_supplement_3.pdf
- elife_poa_e64593_Figure_8_figure_supplement_4.pdf
- elife_poa_e64593_Figure_8_figure_supplement_5.pdf
- elife_poa_e64593_Figure_5_source_data_1.xlsx
- elife_poa_e64593_Figure_7_source_data_1.xlsx
- elife_poa_e64593_Supplementary_file_1.docx
