# Supplementary material for: Combinations of maternal-specific repressive epigenetic marks in the endosperm control seed dormancy
Source: eLife journal article supplement (doi:10.7554/elife.64593), 2021-08-24
Supplement: supp [file elife-64593-supp-v1.zip › elife_poa_e64593_Figure_3_figure_supplement_1.pdf]

1 2 3 4 5 6 7 8

Zinc finger binding motif 5'-C T C T G Y T Y-3'

|       |      |                           |                |                     |
|-------|------|---------------------------|----------------|---------------------|
| REF6  | 1200 | KP-KKIGKKRSGNASFSRVATEKDV | EEEEEEEEEEEEEE | CAAYQCNMEGCTMSFSSEK |
| ELF6  | 1200 | KPIAKRLKKTPKACSGSRQQEVP   | TTTHPN-----    | RCYLEGCKMTFESKA     |
| JMJ13 | 476  | --LARWSLMKSGLCTGLVSN      | TYGTI-----     | VCSL--CK-----       |

|       |      |                           |                       |                      |                             |
|-------|------|---------------------------|-----------------------|----------------------|-----------------------------|
| REF6  | 1259 | QLMLHKRNICPIKGCGKNFFSHKYL | VQHQRVHSDDRPLKCPWKGCK | MTFKWAW              | SRTEHIR                     |
| ELF6  | 1244 | KLQTHKRNRC                | THEGCGKKFRAHKYLV      | LHQRVHKDERPFECSWKGCS | MTFKWQWARTEHLR              |
| JMJ13 | 505  | -----                     | RDCYLA                | FINCECYSHPVCLRH      | DVKKLDLP---CGTHTTL-YLRDNIED |

|       |      |                          |             |                |
|-------|------|--------------------------|-------------|----------------|
| REF6  | 1319 | VHTGARPYVCAEPDCGQTFRFVSD | FSRHKRKTGHS | VKKTNKR        |
| ELF6  | 1304 | LHTGERPYICKVDGCGLSFRFVSD | YSRHR       | RRKTMHYVT----- |
| JMJ13 | 549  | MEAAAMKFE-KEDGVSD        | LITTED      | LYKY-----      |
