# Supplementary material for: Combinations of maternal-specific repressive epigenetic marks in the endosperm control seed dormancy
Source: eLife journal article supplement (doi:10.7554/elife.64593), 2021-08-24
Supplement: supp [file elife-64593-supp-v1.zip › elife_poa_e64593_Figure_5_figure_supplement_3.pdf]

| AGI       | Annotation | Log2FC  | pvalue | Description                                                                               | REF6-binding site | epigenetic profile      | Ethylene | Induced during |
|-----------|------------|---------|--------|-------------------------------------------------------------------------------------------|-------------------|-------------------------|----------|----------------|
| AT3G48350 | CEP3       | -6.7517 | 1E-40  | Involved in starvation-related responses                                                  | Y                 | single H3K27me3         |          | Y              |
| AT3G48740 | SWEET11    | -5.0262 | 2E-108 | member of the SWEET sucrose efflux transporter family proteins                            | Y                 | single H3K27me3         |          | Y              |
| AT1G34510 |            | -4.7075 | 4E-06  | Peroxidase superfamily protein                                                            | Y                 | single H3K27me3         |          |                |
| AT1G78090 | TPPB       | -4.6542 | 1E-16  | homologous to the C-terminal part of microbial trehalose-6-phosphate phosphatases         | Y                 | single H3K27me3         |          |                |
| AT3G56620 | UMAMIT10   | -3.6672 | 1E-134 | nodulin MtN21-like transporter family protein                                             | Y                 | single H3K27me3         | Y        | Y              |
| AT3G30180 | CYP85A2    | -3.3989 | 0      | cytochrome p450 enzyme that catalyzes the last reaction in the production of brassinolide | Y                 | single H3K27me3         | Y        | Y              |
| AT1G47510 | 5PTASE11   | -3.2795 | 2E-07  | phosphatidylinositol polyphosphate 5-phosphatase                                          | Y                 | single H3K27me3         |          |                |
| AT5G49270 | COBL9      | -3.257  | 0.0082 | Involved in successfully establishing tip growth in root hairs                            | Y                 | single H3K27me3         |          |                |
| AT1G05240 | PR9        | -3.0429 | 4E-07  | Peroxidase superfamily protein                                                            | Y                 | single H3K27me3         | Y        |                |
| AT5G49770 |            | -2.9563 | 2E-11  | Leucine rich receptor kinase                                                              | Y                 | single H3K27me3         |          | Y              |
| AT1G30990 |            | -2.9397 | 0.0325 | Polyketide cyclase/dehydrase and lipid transport superfamily protein                      | Y                 | single H3K27me3         |          |                |
| AT5G45090 | PP2-A7     | -2.8767 | 2E-10  | phloem protein 2-A7                                                                       | Y                 | single H3K27me3         |          |                |
| AT3G26210 | CYP71B23   | -2.7183 | 4E-74  | putative cytochrome P450                                                                  | Y                 | single H3K27me3         |          | Y              |
| AT2G39410 | MAGL7      | -2.6411 | 4E-08  | alpha/beta-Hydrolases superfamily protein                                                 | Y                 | single H3K27me3         |          |                |
| AT2G47540 |            | -2.4988 | 0.0305 | Pollen Ole e 1 allergen and extensin family protein                                       | Y                 | single H3K27me3         |          |                |
| AT4G37070 | PLP1       | -2.4772 | 0.0009 | Patatin-related phospholipase A                                                           | Y                 | single H3K27me3         |          |                |
| AT4G23450 | AIRP1      | -2.4157 | 6E-12  | C3H2C3-type RING E3 Ub ligase                                                             | Y                 | single H3K27me3         |          |                |
| AT1G70440 | SRO3       | -2.318  | 4E-24  | protein with similarity to RCD1 but without the WWE domain                                | Y                 | single H3K27me3         |          |                |
| AT4G34580 | COW1       | -2.297  | 0.0013 | phosphatidylinositol transfer protein                                                     | Y                 | single H3K27me3         |          |                |
| AT1G74080 | MYB122     | -2.2785 | 7E-08  | putative transcription factor, member of the R2R3 factor gene family                      | Y                 | single H3K27me3         |          |                |
| AT1G07690 |            | -2.1702 | 1E-80  | transmembrane protein                                                                     | Y                 | single H3K27me3         |          | Y              |
| AT5G46960 | INVINH1    | -2.1555 | 0      | Pectin methylesterase inhibitor that is involved in resistance to Botrytis cinerea        | Y                 | single H3K27me3         |          |                |
| AT2G35585 |            | -2.133  | 1E-15  | cystic fibrosis transmembrane conductance regulator                                       | Y                 | single H3K27me3         |          |                |
| AT5G44390 | BBE25      | -2.12   | 4E-16  | FAD-binding Berberine family protein                                                      | Y                 | single H3K27me3         | Y        |                |
| AT2G38940 | PHT1;4     | -2.0429 | 4E-219 | member of the Pht1 family of phosphate transporters                                       | Y                 | single H3K27me3         |          | Y              |
| AT5G47330 |            | -2.0184 | 1E-12  | alpha/beta-Hydrolases superfamily protein                                                 | Y                 | single H3K27me3         | Y        | Y              |
| AT1G21360 | GLTP2      | -1.9427 | 0.0029 | glycolipid transfer protein                                                               | Y                 | single H3K27me3         | Y        | Y              |
| AT2G26290 | ARSK1      | -1.9085 | 3E-16  | root-specific kinase 1                                                                    | Y                 | single H3K27me3         |          | Y              |
| AT2G32150 |            | -1.8523 | 2E-184 | Haloacid dehalogenase-like hydrolase (HAD) superfamily protein                            | Y                 | single H3K27me3         |          | Y              |
| AT3G49580 | LSU1       | -1.83   | 6E-13  | response to low sulfur 1                                                                  | Y                 | single H3K27me3         |          |                |
| AT3G52920 |            | -1.8191 | 1E-74  | transcriptional activator                                                                 | Y                 | single H3K27me3         |          | Y              |
| AT1G53990 | GLIP3      | -1.794  | 8E-08  | Contains lipase signature motif and GDSL domain                                           | Y                 | single H3K27me3         |          |                |
| AT4G02075 | PIT1       | -1.7851 | 5E-09  | RING/FYVE/PHD zinc finger superfamily protein                                             | Y                 | single H3K27me3         |          | Y              |
| AT3G16470 | JR1        | -1.6975 | 0.0379 | JA-responsive gene that coordinates with GRP7                                             | Y                 | single H3K27me3         |          |                |
| AT1G75580 | SAUR51     | -1.6813 | 1E-21  | SAUR-like auxin-responsive protein family                                                 | Y                 | single H3K27me3         | Y        | Y              |
| AT3G47540 |            | -1.6665 | 9E-33  | Chitinase family protein                                                                  | Y                 | single H3K27me3         |          | Y              |
| AT5G04230 | PAL1       | -1.6036 | 3E-27  | Phenylalanine ammonialyase (PAL) gene family                                              | Y                 | single H3K27me3         |          | Y              |
| AT1G61740 |            | -1.6011 | 3E-79  | Sulfite exporter TauE/SafE family protein                                                 | Y                 | single H3K27me3         |          | Y              |
| AT3G22740 | HMT3       | -1.5418 | 0.012  | homocysteine S-methyltransferase                                                          | Y                 | single H3K27me3         |          |                |
| AT2G41380 |            | -1.517  | 3E-35  | S-adenosyl-L-methionine-dependent methyltransferases superfamily protein                  | Y                 | single H3K27me3         |          | Y              |
| AT5G11060 | KNAT4      | -1.4592 | 6E-06  | member of Class II KN1-like homeodomain transcription factors                             | Y                 | single H3K27me3         |          |                |
| AT5G38010 |            | -1.324  | 0.0391 | UDP-Glycosyltransferase superfamily protein                                               | Y                 | single H3K27me3         |          |                |
| AT1G28190 |            | -1.2967 | 2E-10  | hypothetical protein                                                                      | Y                 | single H3K27me3         | Y        | Y              |
| AT5G51580 |            | -1.291  | 0.0456 | hypothetical protein                                                                      | Y                 | single H3K27me3         |          |                |
| AT1G05000 | PFA-DSP1   | -1.2769 | 1E-91  | atypical dual-specificity phosphatase                                                     | Y                 | single H3K27me3         | Y        | Y              |
| AT3G21230 | 4CL5       | -1.276  | 0.0008 | 4-coumarate coenzyme A ligase being able to use sinapate as substrate                     | Y                 | single H3K27me3         |          |                |
| AT2G39350 | ABCG1      | -1.2717 | 6E-60  | Belongs to a clade of five Arabidopsis thaliana ABCG half-transporters                    | Y                 | single H3K27me3         | Y        | Y              |
| AT1G72490 | DRO1       | -1.2631 | 0.0004 | member of the IGT gene family                                                             | Y                 | single H3K27me3         |          |                |
| AT1G31540 |            | -1.2506 | 1E-80  | Disease resistance protein (TIR-NBS-LRR class) family                                     | Y                 | single H3K27me3         |          |                |
| AT4G19810 | CHIC       | -1.2502 | 1E-118 | Class V chitinase that is a part of glycoside hydrolase family 18 based on CAZy groupings | Y                 | single H3K27me3         |          | Y              |
| AT1G14890 |            | -1.2493 | 5E-11  | Plant invertase/pectin methylesterase inhibitor superfamily protein                       | Y                 | single H3K27me3         | Y        |                |
| AT1G13260 | EDF4       | -1.2457 | 1E-75  | AP2/B3 domain transcription factor                                                        | Y                 | single H3K27me3         |          | Y              |
| AT3G51720 |            | -1.2409 | 5E-27  | WEB family protein                                                                        | Y                 | single H3K27me3         |          | Y              |
| AT1G66090 |            | -1.2273 | 6E-15  | Disease resistance protein (TIR-NBS class)                                                | Y                 | single H3K27me3         |          | Y              |
| AT2G17540 |            | -1.1944 | 9E-15  | hypothetical protein                                                                      | Y                 | single H3K27me3         |          |                |
| AT4G13345 | MEE5       | -1.1732 | 2E-51  | Serinc-domain containing serine and sphingolipid biosynthesis protein                     | Y                 | single H3K27me3         | Y        | Y              |
| AT2G23770 | LYK4       | -1.1561 | 4E-19  | putative LysM-containing receptor-like kinase                                             | Y                 | single H3K27me3         |          | Y              |
| AT5G02780 | GSTL1      | -1.064  | 0.0002 | member of the lambda family of glutathione transferases                                   | Y                 | single H3K27me3         |          | Y              |
| AT3G49110 | PRX33      | -1.0159 | 0.0356 | Class III peroxidase                                                                      | Y                 | single H3K27me3         |          |                |
| AT4G19230 | CYP707A1   | 0.66799 | 2E-16  | CYTOCHROME P450                                                                           | Y                 | no                      | Y        | Y              |
| AT2G29090 | CYP707A2   | 2.55868 | 5E-48  | CYTOCHROME P450                                                                           |                   | no                      | Y        |                |
| AT5G45340 | CYP707A3   | 0.88362 | 0.0024 | CYTOCHROME P450                                                                           | Y                 | no                      |          | Y              |
| AT3G19270 | CYP707A4   | 0.7237  | 1      | CYTOCHROME P450                                                                           |                   | double H3K27me3/H3K9me2 |          |                |
| AT2G19590 | ACO1       | -0.0543 | 0.5298 | ACC oxidase 1                                                                             | Y                 | no                      | Y        | Y              |
| AT1G62380 | ACO2       | -2.2565 | 3E-183 | ACC oxidase 2                                                                             | Y                 | no                      | Y        |                |
| AT1G12010 | ACO3       | -0.4554 | 1      | ACC oxidase 3                                                                             |                   | no                      | Y        |                |
| AT1G05010 | ACO4       | -2.5025 | 1E-239 | ACC oxidase 4                                                                             | Y                 | no                      | Y        | Y              |
| AT1G77330 | ACO5       | -1.9734 | 1E-85  | ACC oxidase 5                                                                             | Y                 | no                      | Y        | Y              |
| AT3G61510 | ACS1       | -0.032  | 1      | ACC synthase 1                                                                            |                   | no                      |          |                |
| AT1G01480 | ACS2       | 0.73224 | 0.044  | ACC synthase 2                                                                            |                   | no                      |          |                |
| AT5G28360 | ACS3       | -       | -      | ACC synthase 3                                                                            |                   | no                      |          |                |
| AT2G22810 | ACS4       | 1.51337 | 0.6134 | ACC synthase 4                                                                            |                   | single H3K27me3         |          |                |
| AT5G65800 | ACS5       | 0.01979 | 1      | ACC synthase 5                                                                            | Y                 | double H3K27me3/H3K9me2 | Y        |                |
| AT4G11280 | ACS6       | 0.2446  | 0.0002 | ACC synthase 6                                                                            |                   | no                      |          | Y              |
| AT4G26200 | ACS7       | -0.6353 | 3E-20  | ACC synthase 7                                                                            |                   | no                      |          | Y              |
| AT4G37770 | ACS8       | 0.10458 | 1      | ACC synthase 8                                                                            |                   | no                      |          |                |
| AT3G49700 | ACS9       | -0.032  | 1      | ACC synthase 9                                                                            | Y                 | no                      |          |                |
| AT1G62960 | ACS10      | 0.02626 | 1      | ACC synthase 10                                                                           | Y                 | no                      |          | Y              |
| AT4G08040 | ACS11      | -0.6882 | 1      | ACC synthase 11                                                                           | Y                 | no                      |          |                |
| AT5G51690 | ACS12      | -0.0056 | 1      | ACC synthase 12                                                                           |                   | no                      |          |                |
