# Supplementary material for: Combinations of maternal-specific repressive epigenetic marks in the endosperm control seed dormancy
Source: eLife journal article supplement (doi:10.7554/elife.64593), 2021-08-24
Supplement: supp [file elife-64593-supp-v1.zip › elife_poa_e64593_Figure_5_source_data_1.xlsx]

## Sheet: Figure 5-source data 2
Figure 5-source data 1. Transcriptome analysis of ref6-1 endosperm during germination.
		raw read counts	raw read counts	raw read counts	raw read counts	raw read counts	raw read counts			wt	ref6	ref6/wt
	id	endo_wt_rep1	endo_wt_rep2	endo_wt_rep3	endo_ref6_rep1	endo_ref6_rep2	endo_ref6_rep3	id	baseMean	baseMeanA	baseMeanB	foldChange	log2FoldChange	pval	padj
1	AT1G01010	172	191	168	122	121	91	AT1G01010	145.211	179.434	110.987	0.618537	-0.693069	3.7555e-05	0.000177752
2	AT1G01020	179	290	207	318	282	227	AT1G01020	249.834	226.493	273.174	1.2061	0.270354	0.190105	0.37228
3	AT1G01030	14	12	25	31	23	24	AT1G01030	22.553	18.4564	26.6497	1.44393	0.529998	0.190579	0.373041
4	AT1G01040	997	1068	815	1253	1126	1140	AT1G01040	1063.45	966.632	1160.27	1.20032	0.263424	0.00062519	0.00241638
5	AT1G01050	706	912	714	1277	1082	1160	AT1G01050	970.934	781.86	1160.01	1.48365	0.569155	3.37791e-11	3.07253e-10
6	AT1G01060	5283	6259	4891	3241	3011	2924	AT1G01060	4265.92	5507.67	3024.18	0.549084	-0.8649	2.52638e-40	9.00822e-39
7	AT1G01070	2703	3229	2699	1126	1036	1036	AT1G01070	1975.62	2896.58	1054.66	0.364105	-1.45757	4.37064e-107	6.49769e-105
8	AT1G01073	0	0	0	0	0	0	AT1G01073	1.00016	1.01126	0.989053	0.97804	-0.0320349	1	1
9	AT1G01080	618	841	726	852	844	755	AT1G01080	771.178	733.695	808.662	1.10218	0.140356	0.174207	0.3462
10	AT1G01090	2407	2912	2291	2898	2480	2517	AT1G01090	2575.92	2550.92	2600.93	1.01961	0.0280114	0.734843	1
11	AT1G01100	4343	5301	4232	6112	5895	5939	AT1G01100	5283.72	4651.35	5916.08	1.2719	0.34699	3.77611e-10	3.12448e-09
12	AT1G01110	353	416	351	340	294	309	AT1G01110	344.233	376.865	311.6	0.826822	-0.274352	0.0160076	0.0448695
13	AT1G01115	0	0	0	0	0	0	AT1G01115	1.00016	1.01126	0.989053	0.97804	-0.0320349	1	1
14	AT1G01120	1500	1774	1545	1228	1136	1241	AT1G01120	1404.15	1619.09	1189.21	0.734492	-0.445181	2.14003e-10	1.81207e-09
15	AT1G01130	123	81	77	118	142	141	AT1G01130	114.676	95.988	133.364	1.38938	0.474442	0.0437003	0.107985
16	AT1G01140	5475	6500	5220	3499	3218	3118	AT1G01140	4503.39	5765.76	3241.02	0.562115	-0.831063	1.27865e-49	5.9465e-48
17	AT1G01150	3	8	8	6	0	5	AT1G01150	5.98341	7.37678	4.59003	0.622227	-0.684487	0.453859	0.72951
18	AT1G01160	979	1021	840	1229	1240	1166	AT1G01160	1076.95	954.694	1199.2	1.25611	0.328963	1.44738e-05	7.29078e-05
19	AT1G01170	483	652	469	1066	1012	949	AT1G01170	767.672	537.025	998.319	1.85898	0.894513	2.01905e-25	4.24499e-24
20	AT1G01180	855	1092	805	692	647	617	AT1G01180	783.489	921.564	645.413	0.700346	-0.51386	6.2928e-08	4.19099e-07
21	AT1G01190	43	64	62	28	16	18	AT1G01190	39.5636	57.778	21.3492	0.369504	-1.43634	9.29489e-06	4.82313e-05
22	AT1G01200	29	43	15	25	44	33	AT1G01200	32.2154	29.7155	34.7154	1.16826	0.224359	0.657743	0.945502
23	AT1G01210	211	276	204	412	410	427	AT1G01210	322.462	232.111	412.812	1.77851	0.83067	3.40854e-12	3.34775e-11
24	AT1G01220	776	1038	717	1026	1004	895	AT1G01220	905.503	846.249	964.757	1.14004	0.189083	0.113601	0.244222
25	AT1G01225	108	121	109	150	125	147	AT1G01225	127.319	114.625	140.014	1.22149	0.288644	0.104275	0.227736
26	AT1G01230	1206	1505	1261	1366	1267	1179	AT1G01230	1294.91	1333.11	1256.7	0.942683	-0.0851556	0.22605	0.428477
27	AT1G01240	653	830	700	1272	1144	1196	AT1G01240	962.085	733.106	1191.06	1.62468	0.700157	7.64598e-19	1.17325e-17
28	AT1G01250	40	66	48	44	50	65	AT1G01250	52.9485	52.3895	53.5074	1.02134	0.0304587	0.974732	1
29	AT1G01260	1286	1477	1201	1068	953	1001	AT1G01260	1163.65	1330.67	996.631	0.748967	-0.417027	1.50162e-08	1.06194e-07
30	AT1G01280	0	2	0	0	4	0	AT1G01280	1.97777	1.63316	2.32239	1.42202	0.507943	0.880254	1
31	AT1G01290	575	739	594	917	907	725	AT1G01290	740.425	640.234	840.617	1.31298	0.392849	0.00181012	0.00636419
32	AT1G01300	10063	11442	9324	26268	24316	23811	AT1G01300	17427.6	10343.5	24511.8	2.36978	1.24475	2.57242e-131	5.38348e-129
33	AT1G01305	2	0	4	0	2	2	AT1G01305	2.72253	3.12268	2.32239	0.743716	-0.427177	0.861539	1
34	AT1G01310	16	5	6	16	12	23	AT1G01310	14.0154	10.217	17.8139	1.74356	0.802033	0.133314	0.278567
35	AT1G01320	3469	3994	3314	4839	4713	4288	AT1G01320	4089.29	3617.23	4561.35	1.261	0.334573	4.05029e-09	3.01154e-08
36	AT1G01340	1256	1484	1265	913	913	919	AT1G01340	1125.62	1345.25	905.994	0.673477	-0.5703	2.11378e-14	2.44193e-13
37	AT1G01350	890	1034	826	1131	950	907	AT1G01350	953.836	923.064	984.607	1.06667	0.0931183	0.325725	0.571331
38	AT1G01355	53	51	47	79	90	74	AT1G01355	66.489	51.8537	81.1242	1.56448	0.645684	0.00792081	0.0239917
39	AT1G01360	297	332	324	386	332	320	AT1G01360	332.299	321.834	342.763	1.06503	0.0908938	0.415669	0.684875
40	AT1G01370	74	99	93	69	34	62	AT1G01370	72.8023	90.3708	55.2337	0.611189	-0.710309	0.00417642	0.0135395
41	AT1G01380	4809	6056	4877	2842	2771	2661	AT1G01380	4001.98	5276.08	2727.88	0.517027	-0.951689	6.38046e-39	2.18623e-37
42	AT1G01390	991	1025	754	292	345	280	AT1G01390	616.486	929.513	303.459	0.326471	-1.61497	2.20436e-22	4.04396e-21
43	AT1G01400	0	0	1	0	0	0	AT1G01400	1.17786	1.36666	0.989053	0.723701	-0.466534	0.987691	1
44	AT1G01410	0	0	0	0	0	0	AT1G01410	1.00016	1.01126	0.989053	0.97804	-0.0320349	1	1
45	AT1G01420	77	75	62	44	54	42	AT1G01420	60.0497	72.9254	47.174	0.646881	-0.628428	0.0141065	0.0401612
46	AT1G01430	236	236	222	303	212	225	AT1G01430	239.516	234.693	244.339	1.0411	0.058107	0.691377	0.976815
47	AT1G01440	596	701	580	755	570	602	AT1G01440	632.871	630.686	635.057	1.00693	0.00996537	0.934804	1
48	AT1G01450	130	190	95	249	195	170	AT1G01450	170.811	138.693	202.93	1.46316	0.549085	0.0384061	0.0967211
49	AT1G01453	7	4	4	2	4	2	AT1G01453	4.86243	6.09103	3.63382	0.596586	-0.745199	0.475308	0.754403
50	AT1G01460	0	0	0	0	0	1	AT1G01460	1.16682	1.01126	1.32239	1.30766	0.386989	1	1
51	AT1G01470	6634	8120	6445	9336	8501	8369	AT1G01470	7869.36	7104.61	8634.12	1.21528	0.281293	1.0491e-06	6.15126e-06
52	AT1G01471	0	0	0	0	0	1	AT1G01471	1.16682	1.01126	1.32239	1.30766	0.386989	1	1
53	AT1G01480	54	75	103	105	142	150	AT1G01480	105.868	79.5638	132.173	1.66122	0.732242	0.0156452	0.0439986
54	AT1G01490	4183	5186	4159	2637	2561	2457	AT1G01490	3529.13	4534.46	2523.79	0.556579	-0.845342	1.98851e-38	6.69546e-37
55	AT1G01500	455	534	449	403	408	337	AT1G01500	431.406	483.567	379.244	0.784263	-0.35059	0.000733324	0.00279345
56	AT1G01510	737	910	707	933	963	880	AT1G01510	852.775	789.442	916.108	1.16045	0.214685	0.00987402	0.0292358
57	AT1G01520	431	575	459	835	661	746	AT1G01520	615.387	491.592	739.181	1.50365	0.588466	6.69428e-07	4.01686e-06
58	AT1G01530	2	5	0	0	7	2	AT1G01530	3.62244	3.25583	3.98905	1.2252	0.293021	0.919798	1
59	AT1G01540	1837	2067	1585	1899	1872	1775	AT1G01540	1834.76	1840.65	1828.87	0.993596	-0.00926846	0.848202	1
60	AT1G01550	6131	7287	5924	5181	4581	4762	AT1G01550	5636.27	6486.94	4785.6	0.737729	-0.438836	5.62567e-16	7.21695e-15
61	AT1G01560	333	418	376	245	227	215	AT1G01560	303.39	379.474	227.307	0.599006	-0.739358	1.01271e-09	8.01621e-09
62	AT1G01570	32	45	30	31	55	39	AT1G01570	39.5097	36.7031	42.3163	1.15294	0.205312	0.561757	0.845915
63	AT1G01580	434	604	507	335	315	298	AT1G01580	416.013	518.704	313.322	0.604048	-0.727266	5.45996e-09	4.00603e-08
64	AT1G01590	82	88	78	0	6	14	AT1G01590	46.0172	84.3787	7.65572	0.0907305	-3.46227	8.01794e-23	1.49871e-21
65	AT1G01600	121	179	118	103	100	109	AT1G01600	122.102	140.343	103.861	0.740057	-0.434292	0.0139264	0.0397025
66	AT1G01610	188	192	162	3202	2981	2950	AT1G01610	1596.7	183.132	3010.27	16.4377	4.03894	0	0
67	AT1G01620	2267	2463	1988	2523	2389	2407	AT1G01620	2334.18	2255.33	2413.04	1.06993	0.0975121	0.123846	0.262207
68	AT1G01630	604	637	552	822	764	750	AT1G01630	687.125	603.593	770.657	1.27678	0.352513	5.44723e-05	0.000252102
69	AT1G01640	23	67	61	99	54	90	AT1G01640	66.1812	51.4572	80.9053	1.57228	0.652861	0.119403	0.254244
70	AT1G01650	2098	2292	1930	1753	1576	1694	AT1G01650	1889.69	2123.25	1656.13	0.779998	-0.358458	3.7283e-08	2.53834e-07
71	AT1G01660	0	2	2	0	0	0	AT1G01660	1.6665	2.34396	0.989053	0.421958	-1.24483	0.5579	0.843232
72	AT1G01670	2	9	6	0	0	0	AT1G01670	3.81054	6.63202	0.989053	0.149133	-2.74533	0.024821	0.0659195
73	AT1G01680	3	7	6	2	0	5	AT1G01680	4.82776	6.35504	3.30049	0.519351	-0.945219	0.344958	0.59674
74	AT1G01690	48	67	63	117	83	78	AT1G01690	76.5828	60.7908	92.3749	1.51955	0.603648	0.00931464	0.0277662
75	AT1G01695	0	0	2	5	0	0	AT1G01695	2.16152	1.72206	2.60098	1.51039	0.594922	0.756291	1
76	AT1G01700	63	69	68	129	114	91	AT1G01700	89.6367	68.3633	110.91	1.62236	0.698097	0.000858536	0.00321948
77	AT1G01710	844	995	807	862	754	759	AT1G01710	835.769	888.318	783.219	0.881687	-0.181661	0.0251455	0.0666774
78	AT1G01720	10057	11888	9691	11189	10354	10298	AT1G01720	10551.3	10610.5	10492.2	0.988845	-0.0161838	0.721793	1
79	AT1G01725	288	342	263	293	310	213	AT1G01725	284.971	300.16	269.781	0.898791	-0.153943	0.321893	0.565762
80	AT1G01730	644	728	499	647	596	591	AT1G01730	616.044	626.85	605.239	0.965526	-0.0506134	0.622258	0.908636
81	AT1G01740	80	95	59	126	84	92	AT1G01740	89.6946	79.1129	100.276	1.26751	0.341996	0.139526	0.289479
82	AT1G01750	83	87	60	61	52	48	AT1G01750	66.0017	78.0155	53.9879	0.692016	-0.531123	0.0288696	0.0751245
83	AT1G01760	67	67	44	59	82	68	AT1G01760	65.3007	60.5915	70.0098	1.15544	0.208442	0.423993	0.695559
84	AT1G01770	675	691	600	810	840	785	AT1G01770	732.86	661.932	803.788	1.21431	0.280132	0.00104901	0.00386395
85	AT1G01780	226	270	235	328	288	304	AT1G01780	275.251	246.436	304.065	1.23385	0.303164	0.0158956	0.0446062
86	AT1G01790	342	365	334	337	305	306	AT1G01790	332.235	351.171	313.3	0.892158	-0.164629	0.162852	0.327486
87	AT1G01800	2593	2827	2492	2606	2373	2396	AT1G01800	2545.43	2660.08	2430.79	0.913806	-0.13004	0.0350574	0.0892938
88	AT1G01810	86	111	87	91	80	113	AT1G01810	95.3841	96.1088	94.6595	0.984921	-0.0219206	0.910299	1
89	AT1G01820	1150	1458	1165	1442	1311	1384	AT1G01820	1314.63	1265.06	1364.2	1.07837	0.108848	0.141609	0.292952
90	AT1G01830	878	1079	797	932	886	876	AT1G01830	905.699	922.611	888.786	0.963338	-0.0538865	0.458686	0.734578
91	AT1G01840	79	93	88	153	135	118	AT1G01840	111.55	88.4527	134.647	1.52225	0.606209	0.00132671	0.00478453
92	AT1G01860	215	216	180	294	268	276	AT1G01860	241.704	206.304	277.104	1.34318	0.425654	0.00134476	0.00484126
93	AT1G01880	33	37	45	36	57	58	AT1G01880	45.4099	39.8914	50.9283	1.27667	0.352388	0.230979	0.435513
94	AT1G01900	42	58	52	17	28	24	AT1G01900	37.9082	52.0134	23.8029	0.457631	-1.12774	0.000504221	0.00198063
95	AT1G01910	1651	2118	1636	1936	1668	1693	AT1G01910	1777.97	1810.48	1745.46	0.964086	-0.0527669	0.509788	0.793347
96	AT1G01920	239	294	256	355	315	302	AT1G01920	293.475	265.846	321.103	1.20785	0.272442	0.0259266	0.0684549
97	AT1G01930	487	524	415	550	487	532	AT1G01930	498.69	479.411	517.968	1.08043	0.111599	0.266419	0.487077
98	AT1G01940	352	513	386	412	390	374	AT1G01940	403.8	419.121	388.479	0.926889	-0.109532	0.340568	0.591326
99	AT1G01950	985	1248	944	1191	1100	1092	AT1G01950	1089.96	1064.31	1115.62	1.04821	0.0679228	0.406126	0.672697
100	AT1G01960	2082	2426	1864	3221	3115	2899	AT1G01960	2590	2135.94	3044.06	1.42516	0.511123	1.07033e-16	1.4509e-15
101	AT1G01970	325	323	287	501	478	417	AT1G01970	388.191	315.544	460.838	1.46046	0.546419	4.70327e-07	2.87028e-06
102	AT1G01980	0	1	0	0	0	1	AT1G01980	1.3223	1.32221	1.32239	1.00013	0.000192535	1	1
103	AT1G01990	626	752	589	808	808	768	AT1G01990	723.45	660.09	786.81	1.19197	0.253353	0.00373622	0.0122173
104	AT1G02000	544	641	516	449	457	476	AT1G02000	514.044	571.348	456.74	0.799409	-0.322995	0.000788811	0.00298102
105	AT1G02010	222	309	204	256	257	244	AT1G02010	248.343	246.166	250.52	1.01768	0.025291	0.922158	1
106	AT1G02020	353	322	312	386	341	371	AT1G02020	348.269	333.775	362.763	1.08685	0.120152	0.271562	0.494456
107	AT1G02030	68	69	43	159	122	124	AT1G02030	97.7257	61.2029	134.248	2.1935	1.13323	3.62313e-08	2.46921e-07
108	AT1G02040	2	4	2	10	9	16	AT1G02040	8.10096	3.65568	12.5462	3.43199	1.77904	0.0192062	0.052727
109	AT1G02050	122	150	142	241	203	192	AT1G02050	175.275	140.2	210.351	1.50037	0.585315	0.000130662	0.000568132
110	AT1G02060	83	94	75	135	148	149	AT1G02060	114.517	85.5231	143.511	1.67804	0.746777	7.71732e-05	0.000348419
111	AT1G02065	0	0	0	0	2	0	AT1G02065	1.33349	1.01126	1.65572	1.63728	0.711304	0.84937	1
112	AT1G02070	2	1	0	0	0	0	AT1G02070	1.50054	2.01203	0.989053	0.491569	-1.02453	0.680673	0.967018
113	AT1G02074	0	0	0	0	0	0	AT1G02074	1.00016	1.01126	0.989053	0.97804	-0.0320349	1	1
114	AT1G02080	2716	3158	2716	3736	3603	3483	AT1G02080	3226.23	2885.03	3567.42	1.23653	0.306294	1.95626e-07	1.23887e-06
115	AT1G02090	1046	1305	982	1191	1001	1090	AT1G02090	1099.27	1116.58	1081.95	0.968987	-0.0454514	0.57868	0.865507
116	AT1G02100	1109	1376	1060	1536	1421	1308	AT1G02100	1296.97	1188.11	1405.84	1.18326	0.242767	0.00257084	0.00874168
117	AT1G02110	356	422	368	615	603	549	AT1G02110	484.532	385.807	583.256	1.51178	0.59625	2.49963e-09	1.8964e-08
118	AT1G02120	1463	1820	1392	1749	1516	1536	AT1G02120	1574.22	1566.26	1582.18	1.01016	0.0145855	0.896784	1
119	AT1G02130	988	1316	968	1065	1055	1014	AT1G02130	1064.51	1095.02	1034	0.944272	-0.0827251	0.331709	0.57916
120	AT1G02140	2711	3502	2649	3221	3162	3012	AT1G02140	3031.93	2966.46	3097.39	1.04414	0.0623109	0.451363	0.726615
121	AT1G02145	387	408	363	567	476	518	AT1G02145	452.742	390.369	515.115	1.31956	0.400056	8.46302e-05	0.000379817
122	AT1G02150	1106	1433	1080	1939	1854	1669	AT1G02150	1506.17	1211.9	1800.43	1.48562	0.571064	1.02063e-10	8.86853e-10
123	AT1G02160	441	595	464	595	606	595	AT1G02160	548.09	503.037	593.142	1.17912	0.237712	0.0147913	0.0418743
124	AT1G02170	1011	1227	1037	965	854	915	AT1G02170	1000.78	1099.8	901.758	0.819929	-0.28643	0.000196018	0.000830278
125	AT1G02180	93	185	127	159	130	146	AT1G02180	139.999	135.749	144.248	1.06261	0.08761	0.765343	1
126	AT1G02190	0	6	2	4	0	0	AT1G02190	2.93318	3.58775	2.2786	0.635104	-0.654936	0.653405	0.941439
127	AT1G02205	5855	7220	5532	2316	2311	2281	AT1G02205	4254.95	6231.59	2278.3	0.365605	-1.45164	8.91624e-60	5.30799e-58
128	AT1G02210	0	0	0	0	0	0	AT1G02210	1.00016	1.01126	0.989053	0.97804	-0.0320349	1	1
129	AT1G02220	2930	3493	2895	697	648	580	AT1G02220	1880.83	3126.63	635.025	0.203102	-2.29972	2.78849e-236	1.85033e-233
130	AT1G02230	26	48	18	34	33	49	AT1G02230	35.2926	31.3017	39.2835	1.255	0.327682	0.45523	0.730766
131	AT1G02250	7	13	3	5	0	2	AT1G02250	5.90091	8.53418	3.26765	0.38289	-1.385	0.110681	0.238964
132	AT1G02260	1252	1417	1196	1260	1107	1189	AT1G02260	1235.52	1298.51	1172.53	0.902978	-0.147237	0.0419924	0.104333
133	AT1G02270	934	1184	952	1048	895	817	AT1G02270	969.589	1029.66	909.516	0.883315	-0.179001	0.0831673	0.187943
134	AT1G02280	1151	1315	1089	2162	2004	1913	AT1G02280	1598.79	1193.93	2003.65	1.6782	0.746912	9.5032e-28	2.21926e-26
135	AT1G02290	206	232	189	270	306	242	AT1G02290	241.037	211.374	270.7	1.28067	0.356898	0.00774322	0.0235061
136	AT1G02300	128	205	164	109	119	103	AT1G02300	138.66	167.19	110.129	0.658706	-0.602293	0.00147013	0.00525716
137	AT1G02305	3750	4575	3687	4097	3764	3620	AT1G02305	3905.26	4027.38	3783.14	0.939355	-0.0902583	0.109804	0.237449
138	AT1G02310	33	61	22	24	30	26	AT1G02310	33.2865	39.18	27.393	0.699157	-0.516312	0.22348	0.42467
139	AT1G02320	0	1	0	1	0	1	AT1G02320	1.48349	1.32221	1.64477	1.24396	0.314937	1	1
140	AT1G02330	912	1089	754	993	940	928	AT1G02330	932.975	922.165	943.785	1.02344	0.0334326	0.787956	1
141	AT1G02335	0	5	0	0	0	1	AT1G02335	1.9442	2.56601	1.32239	0.515348	-0.956382	0.592611	0.877228
142	AT1G02340	12	11	12	12	11	15	AT1G02340	13.1799	12.8354	13.5243	1.05367	0.0754275	0.931989	1
143	AT1G02350	8	4	7	16	11	8	AT1G02350	9.99135	7.50214	12.4806	1.6636	0.734308	0.250165	0.463182
144	AT1G02360	4467	5599	4624	3361	3163	3117	AT1G02360	4051.98	4926.1	3177.86	0.645107	-0.63239	1.99401e-23	3.81983e-22
145	AT1G02370	181	202	190	316	227	250	AT1G02370	227.82	193.778	261.863	1.35136	0.434408	0.00397313	0.0129422
146	AT1G02380	39	51	22	69	43	49	AT1G02380	46.0202	38.14	53.9003	1.41322	0.498989	0.135433	0.282366
147	AT1G02390	108	115	109	344	241	273	AT1G02390	197.991	112.759	283.223	2.51175	1.32869	4.68554e-11	4.19739e-10
148	AT1G02391	0	0	0	0	0	0	AT1G02391	1.00016	1.01126	0.989053	0.97804	-0.0320349	1	1
149	AT1G02400	6233	7153	5816	4955	4627	4425	AT1G02400	5528.91	6442.07	4615.74	0.716501	-0.48096	9.41944e-19	1.43566e-17
150	AT1G02405	87	106	91	213	201	167	AT1G02405	144.322	96.3205	192.324	1.99671	0.997623	4.32053e-09	3.2011e-08
151	AT1G02410	727	849	652	648	569	603	AT1G02410	674.02	747.478	600.562	0.803451	-0.315719	0.000293137	0.00120161
152	AT1G02420	123	167	114	172	188	213	AT1G02420	162.993	135.879	190.106	1.39908	0.484478	0.00285936	0.00961817
153	AT1G02430	55	70	55	86	67	94	AT1G02430	71.8379	61.2948	82.3809	1.34401	0.426545	0.0722476	0.166672
154	AT1G02440	3	2	3	10	14	15	AT1G02440	8.80683	3.73409	13.8796	3.71699	1.89413	0.00859787	0.0258126
155	AT1G02450	143	153	147	294	250	232	AT1G02450	203.295	150.153	256.437	1.70784	0.772177	7.38316e-08	4.89679e-07
156	AT1G02460	4	10	6	3	0	12	AT1G02460	6.7945	7.63279	5.95621	0.780345	-0.357817	0.71273	0.995253
157	AT1G02470	783	908	785	66	80	87	AT1G02470	455.17	832.407	77.9332	0.0936239	-3.41698	1.90333e-172	5.95194e-170
158	AT1G02475	477	494	423	431	443	408	AT1G02475	446.54	469.477	423.604	0.902289	-0.148338	0.150358	0.307452
159	AT1G02490	0	0	0	1	0	0	AT1G02490	1.16135	1.01126	1.31144	1.29684	0.374996	1	1
160	AT1G02500	4194	4730	3919	4770	4859	4432	AT1G02500	4473.47	4311.17	4635.77	1.07529	0.104729	0.0654246	0.153258
161	AT1G02510	0	2	0	0	0	0	AT1G02510	1.31111	1.63316	0.989053	0.605607	-0.723546	0.824525	1
162	AT1G02520	884	1043	834	872	820	779	AT1G02520	870.873	926.636	815.11	0.879644	-0.185009	0.020244	0.0551253
163	AT1G02530	8	5	6	5	4	7	AT1G02530	6.86267	7.45769	6.26765	0.840427	-0.250805	0.819424	1
164	AT1G02540	0	0	0	0	0	0	AT1G02540	1.00016	1.01126	0.989053	0.97804	-0.0320349	1	1
165	AT1G02550	0	0	0	0	0	0	AT1G02550	1.00016	1.01126	0.989053	0.97804	-0.0320349	1	1
166	AT1G02560	2622	3363	2639	3571	3318	3269	AT1G02560	3118.44	2888.99	3347.9	1.15885	0.212689	0.001253	0.00454521
167	AT1G02570	3	0	2	0	4	0	AT1G02570	2.53959	2.75679	2.32239	0.842423	-0.247383	0.981909	1
168	AT1G02575	0	0	0	0	0	1	AT1G02575	1.16682	1.01126	1.32239	1.30766	0.386989	1	1
169	AT1G02580	12	22	23	2	2	0	AT1G02580	11.2329	20.1653	2.30049	0.114082	-3.13186	8.04565e-06	4.21347e-05
170	AT1G02590	0	0	0	0	0	0	AT1G02590	1.00016	1.01126	0.989053	0.97804	-0.0320349	1	1
171	AT1G02610	304	375	261	210	155	173	AT1G02610	246.626	315.23	178.023	0.564742	-0.824336	2.06874e-08	1.44388e-07
172	AT1G02620	3063	3222	2817	2512	2329	2407	AT1G02620	2725	3060.51	2389.49	0.780748	-0.357072	3.8746e-09	2.88564e-08
173	AT1G02630	268	300	196	143	103	118	AT1G02630	188.574	256.391	120.757	0.470988	-1.08624	3.59325e-08	2.45008e-07
174	AT1G02640	89537	102803	83620	67470	62867	60958	AT1G02640	77797.9	92568.4	63027.4	0.680874	-0.554541	2.7156e-30	7.00954e-29
175	AT1G02650	26	17	13	27	17	26	AT1G02650	21.956	19.8853	24.0268	1.20827	0.272943	0.532212	0.818444
176	AT1G02660	1817	2347	1944	1778	1578	1459	AT1G02660	1817.47	2048.41	1586.52	0.774515	-0.368634	7.42565e-05	0.000336367
177	AT1G02670	72	97	63	40	53	32	AT1G02670	60.3075	78.3971	42.2178	0.538512	-0.892949	0.000427721	0.00170674
178	AT1G02680	288	433	332	465	345	336	AT1G02680	365.439	352.979	377.898	1.0706	0.0984149	0.622361	0.908708
179	AT1G02690	195	197	161	302	227	239	AT1G02690	220.214	186.745	253.683	1.35844	0.441955	0.00209022	0.00725906
180	AT1G02700	2983	3750	2935	6059	5640	5545	AT1G02700	4460.85	3239.04	5682.66	1.75443	0.811	1.65443e-46	7.16726e-45
181	AT1G02710	7	20	7	14	8	11	AT1G02710	11.9841	12.1324	11.8358	0.97555	-0.0357118	0.959789	1
182	AT1G02720	223	272	211	325	247	248	AT1G02720	254.129	237.494	270.764	1.14009	0.189147	0.172471	0.343353
183	AT1G02730	82	95	61	74	88	104	AT1G02730	84.6796	80.5135	88.8456	1.10349	0.142069	0.556751	0.842805
184	AT1G02740	570	684	501	663	667	628	AT1G02740	617.376	588.355	646.398	1.09865	0.135734	0.153846	0.312908
185	AT1G02750	553	591	550	566	484	468	AT1G02750	535.89	570.988	500.793	0.877064	-0.189246	0.0529414	0.127666
186	AT1G02770	920	937	828	951	914	956	AT1G02770	917.436	903.96	930.911	1.02981	0.042385	0.587053	0.872418
187	AT1G02780	13694	16377	13373	21219	20359	19924	AT1G02780	17419.4	14569.4	20269.4	1.39123	0.476359	4.32237e-21	7.48056e-20
188	AT1G02790	0	1	0	0	0	0	AT1G02790	1.15563	1.32221	0.989053	0.74803	-0.418832	0.987654	1
189	AT1G02800	3	4	0	0	0	0	AT1G02800	2.13942	3.28979	0.989053	0.300643	-1.73388	0.295617	0.528525
190	AT1G02810	754	852	762	1475	1411	1384	AT1G02810	1102.5	796.818	1408.17	1.76725	0.821505	2.00623e-27	4.60993e-26
191	AT1G02813	2	0	0	0	2	0	AT1G02813	1.6784	1.70108	1.65572	0.973332	-0.0389955	1	1
192	AT1G02816	2337	2840	2283	1673	1451	1541	AT1G02816	2019.61	2501.54	1537.67	0.61469	-0.702068	9.73288e-28	2.27095e-26
193	AT1G02820	0	2	4	0	0	0	AT1G02820	2.0219	3.05476	0.989053	0.323775	-1.62694	0.364543	0.621374
194	AT1G02830	2	0	0	0	0	1	AT1G02830	1.51173	1.70108	1.32239	0.777379	-0.36331	0.98601	1
195	AT1G02840	1763	2087	1621	2546	2246	2205	AT1G02840	2069.8	1834.14	2305.45	1.25696	0.329942	4.34491e-06	2.35052e-05
196	AT1G02850	6865	8110	6771	6126	5583	5358	AT1G02850	6459.98	7297.04	5622.92	0.770577	-0.37599	2.06855e-12	2.05691e-11
197	AT1G02860	1626	1895	1529	1462	1223	1193	AT1G02860	1486.07	1694.49	1277.65	0.754002	-0.407359	1.58382e-07	1.01244e-06
198	AT1G02870	335	407	356	598	517	519	AT1G02870	454.372	369.635	539.109	1.45849	0.544476	1.03398e-07	6.75888e-07
199	AT1G02880	2088	2486	2098	2468	2077	2264	AT1G02880	2241.74	2239.83	2243.64	1.0017	0.00244769	0.982727	1
200	AT1G02890	4095	4770	3941	3875	3604	3439	AT1G02890	3947.59	4297.28	3597.9	0.837251	-0.256268	5.85533e-06	3.11681e-05
201	AT1G02900	1897	2283	1933	1136	924	1017	AT1G02900	1533.21	2052.19	1014.22	0.494213	-1.0168	1.52448e-48	6.8667e-47
202	AT1G02910	560	716	582	696	749	622	AT1G02910	653.007	623.644	682.37	1.09417	0.129831	0.207268	0.398963
203	AT1G02920	20621	24464	20641	4274	3946	3751	AT1G02920	13000.4	22056.3	3944.53	0.178839	-2.48326	0	0
204	AT1G02930	25619	30130	24816	7222	6828	6453	AT1G02930	16891	27025.8	6756.26	0.249993	-2.00004	0	0
205	AT1G02940	15	9	10	1	0	0	AT1G02940	6.92445	12.5375	1.31144	0.104602	-3.25702	0.000440528	0.00175194
206	AT1G02950	17	17	10	4	6	1	AT1G02950	10.1634	15.7149	4.61193	0.293475	-1.76869	0.00744396	0.0226812
207	AT1G02960	393	455	453	516	423	480	AT1G02960	453.69	439.039	468.34	1.06674	0.0932068	0.351677	0.605016
208	AT1G02965	0	0	0	0	0	0	AT1G02965	1.00016	1.01126	0.989053	0.97804	-0.0320349	1	1
209	AT1G02970	34	56	52	24	27	25	AT1G02970	37.3459	48.6322	26.0596	0.535852	-0.900094	0.00560999	0.0176486
210	AT1G02980	7	10	2	5	3	1	AT1G02980	5.59012	7.24593	3.93432	0.542969	-0.881059	0.327129	0.57315
211	AT1G02990	956	1085	833	1012	961	856	AT1G02990	948.542	964.174	932.91	0.967574	-0.0475556	0.543363	0.830538
212	AT1G03000	804	1117	869	1308	1230	1157	AT1G03000	1076.41	934.492	1218.34	1.30374	0.382658	4.32367e-05	0.000203125
213	AT1G03010	0	0	0	0	0	0	AT1G03010	1.00016	1.01126	0.989053	0.97804	-0.0320349	1	1
214	AT1G03020	0	0	0	0	0	0	AT1G03020	1.00016	1.01126	0.989053	0.97804	-0.0320349	1	1
215	AT1G03022	0	0	0	0	0	0	AT1G03022	1.00016	1.01126	0.989053	0.97804	-0.0320349	1	1
216	AT1G03030	392	541	423	544	515	553	AT1G03030	493.571	454.774	532.367	1.17062	0.227271	0.0252694	0.0669187
217	AT1G03040	1103	1288	1082	1346	1212	1123	AT1G03040	1189.87	1166.49	1213.25	1.04009	0.0567033	0.446521	0.721338
218	AT1G03050	2	2	1	1	2	2	AT1G03050	2.66158	2.67838	2.64477	0.987452	-0.0182179	1	1
219	AT1G03055	14	23	15	29	35	39	AT1G03055	26.6639	18.3228	35.0049	1.91045	0.933914	0.0178967	0.0495873
220	AT1G03060	1474	1556	1247	1647	1413	1543	AT1G03060	1476.86	1436.43	1517.29	1.05629	0.0790102	0.308788	0.547192
221	AT1G03070	37	45	28	29	16	17	AT1G03070	29.5276	37.7169	21.3382	0.565748	-0.821769	0.0245033	0.0651522
222	AT1G03080	3594	4273	3421	3224	2933	2658	AT1G03080	3344.58	3785.13	2904.03	0.76722	-0.382288	1.40468e-07	9.04726e-07
223	AT1G03090	190	168	117	313	318	275	AT1G03090	229.964	160.366	299.563	1.868	0.901492	6.61515e-09	4.80309e-08
224	AT1G03100	125	103	88	130	144	102	AT1G03100	116.164	107.428	124.899	1.16263	0.217393	0.297885	0.531567
225	AT1G03103	6	6	6	3	3	3	AT1G03103	5.51752	7.07882	3.95621	0.55888	-0.83939	0.373749	0.632588
226	AT1G03106	1524	1625	1372	5014	4400	4379	AT1G03106	3031.66	1519.56	4543.77	2.99019	1.58024	1.40956e-93	1.65295e-91
227	AT1G03110	202	276	212	310	319	304	AT1G03110	270.223	231.85	308.595	1.33101	0.412524	0.00134065	0.00483031
228	AT1G03120	451	611	461	942	974	901	AT1G03120	720.036	510.395	929.677	1.82148	0.865113	5.74192e-23	1.08107e-21
229	AT1G03130	672	993	681	502	448	506	AT1G03130	632.209	783.591	480.827	0.613619	-0.704584	2.94362e-05	0.000141918
230	AT1G03140	1528	1871	1573	1876	1682	1672	AT1G03140	1696.33	1668.87	1723.78	1.03291	0.0467124	0.500267	0.78211
231	AT1G03150	438	491	388	441	407	410	AT1G03150	429.074	442.654	415.495	0.938645	-0.0913483	0.373025	0.63187
232	AT1G03160	900	1055	920	1051	972	1073	AT1G03160	993.967	966.45	1021.48	1.05694	0.0798979	0.30913	0.547574
233	AT1G03170	2	4	0	0	2	0	AT1G03170	2.3003	2.94488	1.65572	0.562236	-0.830751	0.615607	0.902135
234	AT1G03180	81	62	63	81	68	76	AT1G03180	72.8602	70.6181	75.1023	1.0635	0.0888193	0.690241	0.975668
235	AT1G03190	240	342	289	368	283	349	AT1G03190	311.569	292.845	330.294	1.12788	0.173612	0.253232	0.467618
236	AT1G03200	183	188	183	169	188	184	AT1G03200	183.549	187.627	179.472	0.95654	-0.0641034	0.69144	0.976815
237	AT1G03210	472	547	453	494	427	361	AT1G03210	458.904	494.895	422.914	0.854554	-0.226756	0.0394763	0.0989398
238	AT1G03220	10353	11750	9863	8908	8764	8410	AT1G03220	9664.15	10730.8	8597.47	0.801193	-0.319779	5.88166e-10	4.76665e-09
239	AT1G03230	3303	4146	3225	4859	4625	4597	AT1G03230	4108.54	3575.61	4641.46	1.29809	0.376389	5.08206e-11	4.53915e-10
240	AT1G03240	32	56	32	60	48	42	AT1G03240	45.5833	40.8344	50.3322	1.23259	0.301698	0.335737	0.585028
241	AT1G03250	726	837	658	657	584	690	AT1G03250	691.499	745.534	637.463	0.855042	-0.225933	0.00866119	0.0259826
242	AT1G03260	385	445	341	369	406	317	AT1G03260	377.158	393.366	360.949	0.917592	-0.124075	0.266907	0.487707
243	AT1G03270	65	53	70	97	123	103	AT1G03270	86.1913	64.7888	107.594	1.66069	0.73178	0.000557185	0.0021733
244	AT1G03280	1194	1399	991	1326	1076	1141	AT1G03280	1183.76	1200.05	1167.47	0.97285	-0.0397109	0.707247	0.989832
245	AT1G03290	1391	1727	1412	1318	1260	1126	AT1G03290	1370.42	1519.62	1221.23	0.803642	-0.315376	1.21409e-05	6.19478e-05
246	AT1G03300	53	58	44	58	61	50	AT1G03300	54.8258	52.9642	56.6874	1.0703	0.0980115	0.743121	1
247	AT1G03310	757	853	672	807	764	680	AT1G03310	754.333	766.177	742.488	0.969081	-0.045311	0.579715	0.866673
248	AT1G03320	6	5	5	8	16	3	AT1G03320	8.15697	6.41247	9.90147	1.5441	0.626763	0.408457	0.675777
249	AT1G03330	636	875	606	798	719	712	AT1G03330	721.54	707.828	735.253	1.03875	0.0548428	0.692378	0.977622
250	AT1G03340	597	836	644	952	843	925	AT1G03340	796.494	695.754	897.234	1.28958	0.366906	0.000238082	0.000992682
251	AT1G03350	2154	2728	2285	2000	2033	2004	AT1G03350	2197.87	2404.31	1991.43	0.828275	-0.271819	1.6963e-05	8.46779e-05
252	AT1G03360	237	224	153	283	218	279	AT1G03360	232.337	206.784	257.891	1.24715	0.318636	0.100923	0.221446
253	AT1G03365	489	650	471	645	576	531	AT1G03365	558.556	539.183	577.928	1.07186	0.100114	0.405741	0.672184
254	AT1G03370	2750	3061	2566	2320	2068	1993	AT1G03370	2457.94	2813.29	2102.59	0.747378	-0.420089	9.78643e-12	9.31268e-11
255	AT1G03380	1705	1931	1589	1760	1563	1540	AT1G03380	1678.49	1754.26	1602.72	0.913618	-0.130337	0.0503348	0.122247
256	AT1G03390	3	5	6	1	0	1	AT1G03390	3.68895	5.73314	1.64477	0.286889	-1.80144	0.130564	0.273704
257	AT1G03400	290	374	277	337	294	293	AT1G03400	310.538	315.776	305.3	0.966823	-0.0486761	0.6582	0.945908
258	AT1G03410	393	467	373	641	484	482	AT1G03410	471.989	414.339	529.638	1.27827	0.354197	0.0144877	0.0411003
259	AT1G03430	390	485	374	426	333	337	AT1G03430	390.458	419.256	361.659	0.862619	-0.213204	0.0602134	0.142722
260	AT1G03440	63	97	61	124	112	115	AT1G03440	95.6068	74.5821	116.632	1.5638	0.645057	0.00195846	0.00684242
261	AT1G03445	3	4	4	0	6	6	AT1G03445	4.85022	4.71139	4.98905	1.05893	0.0826135	1	1
262	AT1G03457	33	37	43	37	26	47	AT1G03457	38.2156	39.1806	37.2507	0.950742	-0.0728745	0.865922	1
263	AT1G03470	563	611	510	512	459	468	AT1G03470	520.745	566.44	475.051	0.83866	-0.253842	0.00872227	0.0261514
264	AT1G03475	2417	2765	2252	2722	2646	2495	AT1G03475	2543.49	2494.8	2592.19	1.03904	0.0552495	0.385582	0.648268
265	AT1G03490	0	0	0	1	0	0	AT1G03490	1.16135	1.01126	1.31144	1.29684	0.374996	1	1
266	AT1G03495	114	116	62	128	100	92	AT1G03495	102.345	98.436	106.254	1.07943	0.110265	0.707076	0.989832
267	AT1G03510	67	62	60	109	75	77	AT1G03510	75.7595	64.7231	86.7958	1.34103	0.423343	0.0592745	0.140791
268	AT1G03520	439	531	337	549	480	467	AT1G03520	465.478	437.311	493.646	1.12882	0.174816	0.232707	0.438012
269	AT1G03530	346	411	336	420	483	437	AT1G03530	405.311	367.565	443.058	1.20539	0.269496	0.0129773	0.0373176
270	AT1G03540	29	25	46	45	34	34	AT1G03540	36.6494	35.1358	38.1631	1.08616	0.119236	0.692608	0.977846
271	AT1G03550	545	631	558	757	657	705	AT1G03550	641.272	583.51	699.035	1.19798	0.260608	0.00360633	0.0118466
272	AT1G03560	468	549	445	568	512	449	AT1G03560	497.866	491.294	504.438	1.02675	0.0380901	0.714614	0.997369
273	AT1G03590	1221	1461	1151	1277	1222	1128	AT1G03590	1240.76	1285.51	1196.01	0.930377	-0.104112	0.139552	0.289488
274	AT1G03600	832	1105	853	1458	1403	1421	AT1G03600	1173.55	934.732	1412.36	1.51098	0.595484	1.59397e-15	1.98379e-14
275	AT1G03610	1283	1661	1222	1647	1519	1566	AT1G03610	1477.3	1394.32	1560.29	1.11904	0.162257	0.0501752	0.121914
276	AT1G03620	42	58	46	62	56	53	AT1G03620	53.5956	49.881	57.3103	1.14894	0.200305	0.481033	0.760341
277	AT1G03630	506	555	456	561	546	486	AT1G03630	518.011	510.175	525.848	1.03072	0.0436512	0.665409	0.953548
278	AT1G03650	66	46	35	85	87	74	AT1G03650	66.2883	50.5181	82.0585	1.62434	0.699854	0.00401807	0.0130745
279	AT1G03660	2	1	5	0	0	0	AT1G03660	2.38904	3.78903	0.989053	0.261031	-1.93771	0.230589	0.434898
280	AT1G03670	2	2	0	0	0	2	AT1G03670	1.98935	2.32298	1.65572	0.712756	-0.48852	0.848023	1
281	AT1G03680	879	1103	838	1171	1014	1031	AT1G03680	1002.58	944.99	1060.17	1.12188	0.165924	0.0475821	0.116372
282	AT1G03687	276	333	223	392	372	321	AT1G03687	318.686	279.007	358.364	1.28443	0.361126	0.00572882	0.0179767
283	AT1G03700	0	0	0	1	0	0	AT1G03700	1.16135	1.01126	1.31144	1.29684	0.374996	1	1
284	AT1G03710	22	24	9	42	43	44	AT1G03710	31.395	19.2607	43.5293	2.26001	1.17633	0.00125158	0.00454129
285	AT1G03720	0	0	0	0	0	0	AT1G03720	1.00016	1.01126	0.989053	0.97804	-0.0320349	1	1
286	AT1G03730	467	524	442	492	392	432	AT1G03730	458.189	482.109	434.27	0.900771	-0.150768	0.140578	0.291231
287	AT1G03740	2027	2413	1975	1537	1481	1607	AT1G03740	1839.11	2152.38	1525.83	0.708903	-0.49634	2.97486e-14	3.4135e-13
288	AT1G03750	608	647	500	650	518	574	AT1G03750	582.071	589.601	574.54	0.974455	-0.0373326	0.724129	1
289	AT1G03760	163	243	167	224	192	178	AT1G03760	194.341	192.144	196.537	1.02286	0.0326103	0.891581	1
290	AT1G03770	391	516	383	473	486	433	AT1G03770	446.125	432.439	459.811	1.0633	0.0885427	0.429832	0.70227
291	AT1G03780	64	51	35	78	43	58	AT1G03780	55.5924	51.383	59.8018	1.16384	0.218899	0.514987	0.79897
292	AT1G03790	9888	11059	9156	13832	12590	12339	AT1G03790	11437.1	10104.3	12769.9	1.26381	0.337775	5.04032e-11	4.50335e-10
293	AT1G03800	19	12	11	17	12	20	AT1G03800	16.1708	15.2054	17.1363	1.12699	0.172474	0.752884	1
294	AT1G03810	0	0	0	0	0	0	AT1G03810	1.00016	1.01126	0.989053	0.97804	-0.0320349	1	1
295	AT1G03820	2	0	2	12	8	4	AT1G03820	5.63478	2.41188	8.85768	3.67252	1.87677	0.0390205	0.098005
296	AT1G03830	269	259	195	407	315	310	AT1G03830	292.082	243.631	340.533	1.39774	0.483098	0.00411044	0.0133463
297	AT1G03840	1	13	8	2	19	11	AT1G03840	9.93777	8.24171	11.6338	1.41158	0.49731	0.641433	0.929373
298	AT1G03850	2945	3519	2744	2419	2288	2156	AT1G03850	2674.2	3086.22	2262.17	0.732991	-0.448132	1.69037e-12	1.6895e-11
299	AT1G03860	1300	1551	1390	1399	1354	1402	AT1G03860	1398.18	1425.68	1370.67	0.961415	-0.0567687	0.417069	0.686727
300	AT1G03870	2994	3452	2876	2882	2885	2803	AT1G03870	2977.65	3129.2	2826.11	0.903139	-0.146979	0.0122407	0.0354014
301	AT1G03880	83	113	123	192	206	220	AT1G03880	156.689	108.49	204.887	1.88853	0.917264	1.72778e-08	1.21431e-07
302	AT1G03890	5	17	5	4	1	8	AT1G03890	7.53877	9.79895	5.2786	0.53869	-0.892473	0.274377	0.498445
303	AT1G03900	4778	5650	4425	5409	5007	5108	AT1G03900	5047.47	4978.5	5116.44	1.02771	0.0394284	0.513517	0.79748
304	AT1G03905	470	583	471	672	667	578	AT1G03905	572.214	511.796	632.632	1.2361	0.305798	0.00120765	0.00439361
305	AT1G03910	1598	2081	1503	2208	1938	1879	AT1G03910	1859.29	1733.43	1985.15	1.14521	0.195618	0.0626093	0.147617
306	AT1G03920	1	1	4	2	4	0	AT1G03920	3.02794	3.08872	2.96716	0.960644	-0.0579264	1	1
307	AT1G03930	1147	1316	999	1193	1106	1074	AT1G03930	1136.57	1160.88	1112.26	0.958122	-0.0617195	0.382422	0.644461
308	AT1G03940	169	151	105	169	193	199	AT1G03940	164.855	143.572	186.139	1.29649	0.37461	0.0489517	0.119314
309	AT1G03950	544	661	467	510	417	426	AT1G03950	503.279	560.152	446.406	0.796937	-0.327463	0.00584634	0.0182913
310	AT1G03960	220	278	277	272	257	326	AT1G03960	272.396	261.781	283.011	1.0811	0.112498	0.474832	0.75378
311	AT1G03970	1296	1454	1208	1102	1183	1159	AT1G03970	1233.19	1329.46	1136.92	0.855179	-0.225702	0.00169213	0.00597714
312	AT1G03980	859	966	780	703	741	772	AT1G03980	803.419	874.879	731.96	0.836641	-0.257319	0.00167416	0.00591753
313	AT1G03982	0	0	0	0	0	0	AT1G03982	1.00016	1.01126	0.989053	0.97804	-0.0320349	1	1
314	AT1G03990	119	138	111	140	130	106	AT1G03990	124.603	124.416	124.79	1.003	0.00432675	1	1
315	AT1G04000	548	663	511	533	531	462	AT1G04000	540.806	577.791	503.821	0.871977	-0.197638	0.0347299	0.0885531
316	AT1G04010	227	259	208	222	238	189	AT1G04010	224.329	233.765	214.892	0.919265	-0.121447	0.370998	0.62938
317	AT1G04020	193	260	220	180	193	171	AT1G04020	203.483	226.614	180.352	0.795855	-0.329422	0.020186	0.0550116
318	AT1G04030	334	441	362	405	329	392	AT1G04030	376.942	381.995	371.889	0.973544	-0.0386825	0.711732	0.994196
319	AT1G04040	442	567	460	258	246	246	AT1G04040	370.709	493.254	248.165	0.503117	-0.991034	7.56305e-19	1.16183e-17
320	AT1G04050	55	50	34	62	42	60	AT1G04050	51.2947	47.6124	54.977	1.15468	0.207489	0.468009	0.74569
321	AT1G04070	471	537	423	506	426	421	AT1G04070	463.614	480.778	446.45	0.928598	-0.106874	0.286834	0.516512
322	AT1G04080	2461	3141	2396	3535	3082	3001	AT1G04080	2923.18	2678.07	3168.29	1.18305	0.242512	0.00742681	0.0226315
323	AT1G04090	44	23	20	22	7	16	AT1G04090	23.0977	30.4472	15.7482	0.51723	-0.951121	0.115023	0.246771
324	AT1G04100	164	220	145	125	105	119	AT1G04100	146.736	177.518	115.954	0.653194	-0.614417	0.000183277	0.000779465
325	AT1G04110	72	83	59	31	31	23	AT1G04110	50.8026	72.6222	28.983	0.399093	-1.3252	2.77162e-06	1.54202e-05
326	AT1G04120	4027	4834	3795	3986	3536	3524	AT1G04120	3940.6	4241.84	3639.35	0.857966	-0.221008	0.000523707	0.00205125
327	AT1G04130	174	255	242	255	215	260	AT1G04130	233.928	226.325	241.531	1.06719	0.093814	0.582594	0.86917
328	AT1G04140	2586	3165	2616	3392	2973	2839	AT1G04140	2919.34	2806.83	3031.86	1.08017	0.111259	0.148493	0.304385
329	AT1G04150	6	2	0	0	2	0	AT1G04150	2.67917	3.70263	1.65572	0.447174	-1.16109	0.431592	0.704162
330	AT1G04160	139	189	130	213	153	132	AT1G04160	159.291	153.925	164.657	1.06972	0.0972358	0.693315	0.97854
331	AT1G04170	2436	2931	2387	3209	3007	3107	AT1G04170	2837.24	2600.95	3073.53	1.1817	0.240858	7.23566e-05	0.000328308
332	AT1G04171	0	0	0	0	0	0	AT1G04171	1.00016	1.01126	0.989053	0.97804	-0.0320349	1	1
333	AT1G04180	25	15	8	21	30	22	AT1G04180	21.117	17.1415	25.0925	1.46385	0.549764	0.214092	0.409662
334	AT1G04190	695	676	705	894	917	877	AT1G04190	794.342	701.483	887.202	1.26475	0.338855	3.55553e-05	0.000169141
335	AT1G04200	560	629	523	512	567	507	AT1G04200	549.837	575.623	524.051	0.910407	-0.135417	0.147504	0.302844
336	AT1G04210	2092	2263	2019	2220	2030	1926	AT1G04210	2089.57	2143.8	2035.35	0.949415	-0.0748887	0.251586	0.465243
337	AT1G04220	677	781	620	501	459	447	AT1G04220	581.11	697.715	464.504	0.665751	-0.586946	2.61183e-10	2.19381e-09
338	AT1G04230	468	472	416	528	502	434	AT1G04230	470.126	457.044	483.209	1.05725	0.0803137	0.415591	0.68479
339	AT1G04240	15	42	21	35	28	25	AT1G04240	28.3237	26.7082	29.9392	1.12098	0.164755	0.746047	1
340	AT1G04250	98	128	76	246	269	259	AT1G04250	178.96	101.624	256.296	2.52199	1.33456	2.39866e-17	3.38475e-16
341	AT1G04260	653	770	579	478	589	538	AT1G04260	601.101	671.446	530.756	0.790468	-0.339221	0.00227083	0.00782128
342	AT1G04270	6624	8059	6405	10425	10183	9698	AT1G04270	8528.42	7067.98	9988.86	1.41326	0.499023	3.39839e-21	5.92081e-20
343	AT1G04280	821	981	913	832	742	759	AT1G04280	841.626	913.704	769.547	0.842228	-0.247717	0.00258516	0.00878708
344	AT1G04290	799	908	798	786	739	732	AT1G04290	793.632	842.546	744.718	0.88389	-0.178062	0.0328144	0.0841739
345	AT1G04300	2479	3051	2336	2934	2774	2790	AT1G04300	2718.25	2634.97	2801.54	1.06322	0.0884337	0.166238	0.333043
346	AT1G04310	434	531	377	327	339	295	AT1G04310	383.773	449.802	317.743	0.706405	-0.501433	6.50813e-06	3.44609e-05
347	AT1G04330	0	2	0	0	1	2	AT1G04330	1.81111	1.63316	1.98905	1.21792	0.284416	1	1
348	AT1G04340	419	544	393	519	477	507	AT1G04340	475.332	454.358	496.307	1.09233	0.127406	0.231454	0.436228
349	AT1G04350	496	577	513	491	447	429	AT1G04350	492.553	533.825	451.281	0.845372	-0.242342	0.0146317	0.0414526
350	AT1G04360	38	48	33	56	46	28	AT1G04360	42.2405	40.7716	43.7093	1.07205	0.100375	0.774177	1
351	AT1G04370	0	1	0	0	2	0	AT1G04370	1.48896	1.32221	1.65572	1.25224	0.324507	1	1
352	AT1G04380	145	230	154	241	206	196	AT1G04380	194.979	177.273	212.684	1.19975	0.262737	0.133311	0.278567
353	AT1G04390	360	436	334	502	435	466	AT1G04390	421.308	379.457	463.16	1.22059	0.287576	0.00699342	0.0214502
354	AT1G04400	5418	6046	4998	5280	4732	4743	AT1G04400	5193.77	5526.03	4861.52	0.87975	-0.184835	0.000718977	0.00274418
355	AT1G04410	40673	49202	38856	41581	38848	37467	AT1G04410	40991.4	43138.3	38844.4	0.900463	-0.151261	0.00623567	0.019375
356	AT1G04420	623	766	677	909	830	835	AT1G04420	771.861	694.684	849.038	1.22219	0.289473	0.000588111	0.00228704
357	AT1G04430	1177	1332	1083	1674	1425	1361	AT1G04430	1337.69	1206.05	1469.33	1.2183	0.284864	0.00132519	0.0047797
358	AT1G04440	2162	2494	2192	1849	1696	1514	AT1G04440	1984.17	2301.25	1667.08	0.724423	-0.465096	6.44573e-13	6.6526e-12
359	AT1G04445	4	12	6	5	10	11	AT1G04445	8.92784	8.25469	9.60098	1.16309	0.217967	0.837249	1
360	AT1G04450	0	4	3	4	2	1	AT1G04450	3.29993	3.32126	3.2786	0.987156	-0.0186503	1	1
361	AT1G04470	2	2	0	0	1	3	AT1G04470	2.32268	2.32298	2.32239	0.999743	-0.000370132	1	1
362	AT1G04480	3776	4202	3401	5401	5031	5017	AT1G04480	4455.12	3818.72	5091.53	1.33331	0.41501	1.59574e-13	1.73933e-12
363	AT1G04490	2863	3156	2688	4700	4322	4236	AT1G04490	3647.02	2925.16	4368.87	1.49355	0.578743	1.22505e-23	2.37214e-22
364	AT1G04500	7	3	2	4	7	0	AT1G04500	4.84061	5.06929	4.61193	0.909779	-0.136412	0.974728	1
365	AT1G04501	0	0	0	0	0	0	AT1G04501	1.00016	1.01126	0.989053	0.97804	-0.0320349	1	1
366	AT1G04510	1311	1451	1200	1649	1523	1501	AT1G04510	1435.73	1330.86	1540.6	1.1576	0.21114	0.00256791	0.00873283
367	AT1G04520	264	262	241	330	252	214	AT1G04520	260.949	259.188	262.71	1.01359	0.0194716	0.892571	1
368	AT1G04530	2204	2612	2187	2566	2238	2201	AT1G04530	2329.28	2350.65	2307.9	0.981811	-0.0264828	0.663325	0.951264
369	AT1G04540	71	56	71	78	73	91	AT1G04540	74.4742	68.1465	80.8018	1.18571	0.245749	0.267934	0.489157
370	AT1G04550	350	407	311	431	442	393	AT1G04550	388.543	358.816	418.271	1.1657	0.221193	0.0459996	0.112989
371	AT1G04555	279	249	206	314	237	271	AT1G04555	259.716	247.88	271.552	1.0955	0.131583	0.403407	0.669295
372	AT1G04560	6003	6964	5829	20006	18267	17983	AT1G04560	12421.3	6308.59	18534	2.9379	1.55478	1.18151e-193	4.72707e-191
373	AT1G04570	102	126	75	88	85	78	AT1G04570	92.8596	102.027	83.6923	0.820298	-0.28578	0.153454	0.312286
374	AT1G04580	20	28	25	26	23	21	AT1G04580	24.7694	25.5011	24.0378	0.942618	-0.0852548	0.863767	1
375	AT1G04590	430	460	380	587	584	551	AT1G04590	497.987	427.412	568.563	1.33025	0.411694	3.11989e-05	0.000149647
376	AT1G04600	9	14	16	26	18	25	AT1G04600	18.9298	14.1551	23.7044	1.67462	0.74383	0.106422	0.231431
377	AT1G04610	2	12	14	34	25	31	AT1G04610	20.5125	10.4081	30.6168	2.94165	1.55662	0.000609289	0.00236164
378	AT1G04620	257	339	233	443	389	391	AT1G04620	340.84	277.873	403.806	1.4532	0.539235	3.69028e-06	2.01642e-05
379	AT1G04625	32	48	27	34	34	41	AT1G04625	36.76	36.5698	36.9502	1.0104	0.0149293	1	1
380	AT1G04630	717	944	671	834	745	699	AT1G04630	765.757	780.322	751.192	0.96267	-0.0548872	0.590114	0.874826
381	AT1G04635	70	62	64	83	66	80	AT1G04635	71.7966	67.1795	76.4137	1.13746	0.185812	0.41776	0.687615
382	AT1G04640	127	137	121	138	171	168	AT1G04640	144.448	130.418	158.478	1.21515	0.281138	0.0969074	0.214277
383	AT1G04645	0	0	0	0	2	1	AT1G04645	1.50016	1.01126	1.98905	1.96691	0.975927	0.706454	0.989832
384	AT1G04650	65	131	77	105	62	84	AT1G04650	87.5184	91.5306	83.5062	0.912331	-0.13237	0.666663	0.954592
385	AT1G04660	341	430	336	830	834	718	AT1G04660	578.826	371.748	785.903	2.11407	1.08002	6.51988e-29	1.588e-27
386	AT1G04670	0	0	0	2	0	0	AT1G04670	1.32254	1.01126	1.63382	1.61563	0.692099	0.849864	1
387	AT1G04680	222	207	216	361	331	273	AT1G04680	268.709	218.714	318.704	1.45717	0.543168	9.56094e-05	0.000425372
388	AT1G04684	0	0	0	0	0	0	AT1G04684	1.00016	1.01126	0.989053	0.97804	-0.0320349	1	1
389	AT1G04690	2002	2479	1854	2815	2409	2383	AT1G04690	2313.56	2121.28	2505.84	1.18129	0.24036	0.0106719	0.0313001
390	AT1G04700	101	109	125	153	160	203	AT1G04700	142.74	114.166	171.314	1.50057	0.585515	0.00315362	0.0105105
391	AT1G04710	714	801	620	664	575	594	AT1G04710	660.708	716.696	604.72	0.843761	-0.245094	0.00530469	0.0168008
392	AT1G04730	133	168	137	148	114	128	AT1G04730	138.591	147.814	129.369	0.875216	-0.19229	0.260158	0.477944
393	AT1G04750	2435	2808	2356	2721	2544	2480	AT1G04750	2552.1	2551.34	2552.87	1.0006	0.000865283	0.999357	1
394	AT1G04760	6	4	5	12	13	6	AT1G04760	8.64627	6.10152	11.191	1.83414	0.8751	0.213147	0.408171
395	AT1G04770	1214	1541	1149	1115	1109	932	AT1G04770	1174.02	1307.26	1040.78	0.796156	-0.328878	0.00158428	0.00562762
396	AT1G04778	5	11	14	0	6	9	AT1G04778	8.56045	11.1318	5.98905	0.538011	-0.894294	0.209084	0.40169
397	AT1G04780	3265	4000	3185	3179	2914	2757	AT1G04780	3209.54	3502.89	2916.19	0.832509	-0.264463	5.3581e-05	0.00024825
398	AT1G04790	640	841	599	863	746	730	AT1G04790	733.678	696.147	771.208	1.10782	0.147728	0.199178	0.386077
399	AT1G04800	228	228	186	4	10	5	AT1G04800	111.965	216.652	7.2786	0.0335958	-4.89557	2.3554e-74	1.8051e-72
400	AT1G04810	2116	2542	2207	3022	2717	2672	AT1G04810	2538.61	2305.64	2771.57	1.20208	0.265535	1.49296e-05	7.49817e-05
401	AT1G04820	5092	6198	4979	6385	6186	5833	AT1G04820	5759.93	5454.1	6065.76	1.11215	0.153347	0.00562859	0.0176933
402	AT1G04830	454	503	464	509	514	427	AT1G04830	478.832	478.914	478.75	0.999658	-0.000493204	0.996654	1
403	AT1G04840	42	47	25	45	43	42	AT1G04840	41.4134	38.9971	43.8298	1.12392	0.168542	0.628435	0.915073
404	AT1G04850	4075	4618	3936	4717	4250	4181	AT1G04850	4286.68	4241.34	4332.02	1.02138	0.0305183	0.589573	0.874444
405	AT1G04860	1208	1516	1167	1592	1535	1467	AT1G04860	1409.35	1303.81	1514.89	1.16189	0.216478	0.00251359	0.00856307
406	AT1G04870	461	484	406	801	694	651	AT1G04870	581.18	454.807	707.553	1.55572	0.637585	3.27431e-11	2.98528e-10
407	AT1G04880	17	22	18	7	9	20	AT1G04880	16.5126	20.1128	12.9124	0.641999	-0.639356	0.195071	0.380002
408	AT1G04890	0	0	0	0	0	0	AT1G04890	1.00016	1.01126	0.989053	0.97804	-0.0320349	1	1
409	AT1G04900	286	307	263	472	385	368	AT1G04900	346.371	288.587	404.155	1.40046	0.485901	2.34682e-05	0.00011469
410	AT1G04910	1170	1525	1274	1787	1550	1712	AT1G04910	1497.98	1331.53	1664.43	1.25001	0.321935	9.5586e-05	0.000425372
411	AT1G04920	3344	3880	3252	7713	7178	6649	AT1G04920	5306.59	3516.64	7096.55	2.01799	1.01292	1.50078e-51	7.37007e-50
412	AT1G04930	133	166	142	222	215	181	AT1G04930	176.764	148.969	204.559	1.37317	0.457505	0.00284447	0.00956933
413	AT1G04940	981	1157	949	1374	1109	1089	AT1G04940	1106.51	1036.41	1176.61	1.13528	0.183044	0.0807362	0.183226
414	AT1G04945	1031	1230	1039	1428	1178	1218	AT1G04945	1184.18	1108.34	1260.02	1.13685	0.185046	0.0226716	0.060956
415	AT1G04950	363	387	336	593	519	541	AT1G04950	455.731	365.966	545.497	1.49057	0.575864	1.69218e-08	1.19083e-07
416	AT1G04960	882	1006	781	655	644	604	AT1G04960	761.878	895.605	628.152	0.701371	-0.511749	1.15142e-09	9.0799e-09
417	AT1G04970	1726	1853	1654	1434	1355	1261	AT1G04970	1547.82	1760.35	1335.29	0.758538	-0.398707	6.57158e-09	4.77273e-08
418	AT1G04980	508	553	474	638	623	620	AT1G04980	568.823	516.641	621.005	1.20201	0.265443	0.00468674	0.0150576
419	AT1G04985	840	972	852	912	777	848	AT1G04985	866.226	895.78	836.672	0.934015	-0.0984826	0.226808	0.429524
420	AT1G04990	895	1100	841	1125	1121	954	AT1G04990	1002.99	950.642	1055.34	1.11013	0.150734	0.115419	0.247484
421	AT1G05000	3428	4124	3384	1682	1431	1481	AT1G05000	2591.15	3668.39	1513.91	0.41269	-1.27687	1.23364e-93	1.45292e-91
422	AT1G05010	2410	2830	2336	455	474	429	AT1G05010	1495.56	2542.45	448.675	0.176474	-2.50248	1.88038e-242	1.42105e-239
423	AT1G05020	606	757	605	601	545	585	AT1G05020	615.921	660.433	571.41	0.865205	-0.208886	0.0195595	0.0535508
424	AT1G05030	153	172	182	175	154	163	AT1G05030	167.511	171.949	163.073	0.948383	-0.0764577	0.661892	0.94986
425	AT1G05040	0	0	2	0	0	0	AT1G05040	1.35556	1.72206	0.989053	0.574343	-0.800015	0.822685	1
426	AT1G05055	297	382	293	323	353	299	AT1G05055	324.409	326.365	322.453	0.988015	-0.0173955	0.851379	1
427	AT1G05060	291	335	294	416	469	480	AT1G05060	380.735	310.036	451.435	1.45607	0.542083	8.81192e-07	5.21848e-06
428	AT1G05065	12	14	9	24	23	22	AT1G05065	18.2142	12.7021	23.7263	1.86791	0.901423	0.0589524	0.140197
429	AT1G05070	265	333	241	329	364	312	AT1G05070	306.999	281.61	332.387	1.18031	0.239166	0.0531854	0.128174
430	AT1G05080	4	6	0	2	0	0	AT1G05080	2.94521	4.2566	1.63382	0.383833	-1.38145	0.299574	0.533775
431	AT1G05085	2	1	0	2	1	0	AT1G05085	1.9896	2.01203	1.96716	0.977697	-0.032541	1	1
432	AT1G05090	417	462	430	538	490	465	AT1G05090	467.043	441.32	492.766	1.11657	0.159079	0.110187	0.238125
433	AT1G05100	283	358	272	113	109	108	AT1G05100	208.181	306.61	109.752	0.357953	-1.48216	3.63928e-24	7.21649e-23
434	AT1G05120	665	715	692	848	728	667	AT1G05120	719.007	698.642	739.372	1.0583	0.0817467	0.384839	0.647251
435	AT1G05136	0	0	1	0	0	0	AT1G05136	1.17786	1.36666	0.989053	0.723701	-0.466534	0.987691	1
436	AT1G05140	593	683	545	942	901	866	AT1G05140	752.646	611.615	893.677	1.46118	0.54713	1.52971e-10	1.3116e-09
437	AT1G05150	1076	1364	1048	1867	1581	1621	AT1G05150	1419.47	1168.73	1670.22	1.42909	0.515095	7.99418e-09	5.7659e-08
438	AT1G05160	238	315	251	462	444	396	AT1G05160	350.093	270.254	429.931	1.59084	0.669788	5.07761e-09	3.73644e-08
439	AT1G05170	620	830	560	691	611	567	AT1G05170	644.196	671.968	616.424	0.917342	-0.124468	0.333185	0.581177
440	AT1G05180	856	1110	922	1126	1017	946	AT1G05180	993.708	969.087	1018.33	1.05081	0.071505	0.431705	0.704261
441	AT1G05190	1628	2157	1662	3084	2847	2707	AT1G05190	2335.24	1823.92	2846.56	1.56068	0.642179	4.58485e-16	5.93131e-15
442	AT1G05200	96	113	84	116	121	151	AT1G05200	114.083	99.1136	129.052	1.30207	0.380803	0.0464313	0.113915
443	AT1G05205	739	994	814	884	813	762	AT1G05205	832.629	854.279	810.978	0.949313	-0.075045	0.410828	0.678751
444	AT1G05210	35	25	26	21	29	48	AT1G05210	31.7615	30.0973	33.4258	1.11059	0.15133	0.734899	1
445	AT1G05220	29	31	24	53	42	49	AT1G05220	38.7958	29.1827	48.4088	1.65882	0.730157	0.0225568	0.0606945
446	AT1G05230	138	178	122	231	208	216	AT1G05230	182.055	147.317	216.794	1.47162	0.5574	0.000272252	0.00112413
447	AT1G05240	24	33	29	3	2	3	AT1G05240	16.74	29.857	3.62288	0.121341	-3.04286	6.73473e-08	4.47545e-07
448	AT1G05250	24	35	39	3	3	5	AT1G05250	19.3279	34.0329	4.62288	0.135835	-2.88007	2.42819e-08	1.67882e-07
449	AT1G05260	7	6	2	6	2	4	AT1G05260	5.46275	6.00214	4.92337	0.820269	-0.28583	0.806336	1
450	AT1G05270	1345	1541	1235	1413	1399	1294	AT1G05270	1368.6	1383.01	1354.19	0.97916	-0.0303827	0.643658	0.932039
451	AT1G05280	17	8	14	39	30	16	AT1G05280	21.6167	14.3379	28.8954	2.01531	1.011	0.0354275	0.0901205
452	AT1G05290	0	0	0	0	0	0	AT1G05290	1.00016	1.01126	0.989053	0.97804	-0.0320349	1	1
453	AT1G05291	0	0	0	0	0	0	AT1G05291	1.00016	1.01126	0.989053	0.97804	-0.0320349	1	1
454	AT1G05300	626	732	524	382	335	300	AT1G05300	483.289	630.77	335.807	0.532377	-0.909481	6.71849e-13	6.92098e-12
455	AT1G05310	0	0	0	2	0	4	AT1G05310	1.98921	1.01126	2.96716	2.93412	1.55293	0.388506	0.651485
456	AT1G05320	832	904	672	141	131	105	AT1G05320	466.508	807.904	125.112	0.15486	-2.69096	4.82758e-65	3.1648e-63
457	AT1G05330	39	65	22	46	38	42	AT1G05330	42.4894	42.4933	42.4855	0.999816	-0.000265849	0.963974	1
458	AT1G05340	888	1118	917	1093	918	867	AT1G05340	964.596	980.835	948.357	0.966887	-0.0485806	0.62187	0.908283
459	AT1G05350	650	731	597	683	642	605	AT1G05350	650.763	664.681	636.845	0.958122	-0.0617193	0.483084	0.762475
460	AT1G05360	307	382	272	335	355	313	AT1G05360	327.003	322.35	331.655	1.02887	0.0410538	0.780152	1
461	AT1G05370	28	20	20	15	2	18	AT1G05370	18.2436	23.9958	12.4915	0.520572	-0.941831	0.0529894	0.12777
462	AT1G05380	1303	1545	1271	1604	1461	1449	AT1G05380	1435.33	1382.56	1488.1	1.07633	0.106125	0.135057	0.281647
463	AT1G05385	99	148	100	138	131	161	AT1G05385	129.765	116.718	142.812	1.22356	0.291087	0.114349	0.245674
464	AT1G05400	54	105	43	85	78	96	AT1G05400	76.9801	67.5683	86.3919	1.27859	0.354548	0.312385	0.552333
465	AT1G05410	414	526	354	524	497	434	AT1G05410	456.714	433.175	480.253	1.10868	0.148842	0.266704	0.4875
466	AT1G05420	2	0	0	0	0	1	AT1G05420	1.51173	1.70108	1.32239	0.777379	-0.36331	0.98601	1
467	AT1G05430	621	758	663	680	536	566	AT1G05430	637.038	686.531	587.545	0.855817	-0.224625	0.0203667	0.0554207
468	AT1G05440	5	13	8	9	9	1	AT1G05440	8.42261	9.62135	7.22386	0.750815	-0.41347	0.579262	0.86614
469	AT1G05450	0	0	0	0	0	1	AT1G05450	1.16682	1.01126	1.32239	1.30766	0.386989	1	1
470	AT1G05460	169	264	169	352	276	274	AT1G05460	249.628	201.454	297.802	1.47826	0.563901	0.0027284	0.00922328
471	AT1G05470	14	28	18	28	31	34	AT1G05470	26.3132	20.9438	31.6825	1.51274	0.597165	0.1381	0.287045
472	AT1G05490	9	10	2	14	10	9	AT1G05490	9.88577	7.93576	11.8358	1.49145	0.576716	0.410111	0.677937
473	AT1G05500	1127	1397	1042	1223	1146	1011	AT1G05500	1154.36	1194.45	1114.27	0.932871	-0.10025	0.280256	0.50699
474	AT1G05510	210	250	208	332	345	310	AT1G05510	275.729	225.103	326.354	1.4498	0.535854	2.18754e-05	0.000107407
475	AT1G05520	1353	1680	1398	2110	1819	1846	AT1G05520	1694.9	1486.92	1902.89	1.27975	0.355866	1.03185e-06	6.05662e-06
476	AT1G05530	2	3	6	0	0	2	AT1G05530	3.21102	4.76633	1.65572	0.347378	-1.52542	0.241832	0.451502
477	AT1G05540	0	0	2	0	4	0	AT1G05540	2.02222	1.72206	2.32239	1.34861	0.431474	0.879164	1
478	AT1G05550	0	0	0	0	0	0	AT1G05550	1.00016	1.01126	0.989053	0.97804	-0.0320349	1	1
479	AT1G05560	1860	2073	1704	1074	1013	1092	AT1G05560	1470.82	1892.74	1048.9	0.554168	-0.851605	2.88899e-34	8.5712e-33
480	AT1G05570	11908	13684	11175	14812	13809	13085	AT1G05570	13037.8	12334.8	13740.8	1.11399	0.155731	0.0024405	0.00833809
481	AT1G05575	2386	2876	2308	1706	1574	1611	AT1G05575	2075.58	2538.52	1612.65	0.63527	-0.654559	1.11291e-24	2.25449e-23
482	AT1G05577	0	0	1	2	0	0	AT1G05577	1.50024	1.36666	1.63382	1.19549	0.257599	1	1
483	AT1G05580	0	0	2	0	0	1	AT1G05580	1.52222	1.72206	1.32239	0.76791	-0.380991	0.986026	1
484	AT1G05590	297	292	202	465	394	460	AT1G05590	350.801	266.038	435.565	1.63723	0.711257	4.49015e-07	2.747e-06
485	AT1G05600	177	244	208	260	244	259	AT1G05600	232.166	211.855	252.476	1.19174	0.253068	0.0651825	0.152823
486	AT1G05610	0	4	0	0	1	7	AT1G05610	2.95539	2.25506	3.65572	1.62112	0.696991	0.717993	1
487	AT1G05615	0	0	0	0	0	0	AT1G05615	1.00016	1.01126	0.989053	0.97804	-0.0320349	1	1
488	AT1G05620	1094	1127	907	1092	1027	1003	AT1G05620	1040.42	1051.13	1029.7	0.979612	-0.0297174	0.69389	0.979147
489	AT1G05630	90	66	67	122	102	109	AT1G05630	93.5206	76.3877	110.653	1.44858	0.534636	0.00837612	0.0252164
490	AT1G05640	80	103	69	175	159	166	AT1G05640	125.447	85.1545	165.74	1.94634	0.960766	1.42452e-07	9.1642e-07
491	AT1G05650	0	0	0	0	0	0	AT1G05650	1.00016	1.01126	0.989053	0.97804	-0.0320349	1	1
492	AT1G05660	0	4	2	0	0	0	AT1G05660	1.97745	2.96586	0.989053	0.33348	-1.58433	0.36797	0.625413
493	AT1G05670	261	278	200	265	281	310	AT1G05670	265.989	248.557	283.421	1.14027	0.189372	0.151423	0.308956
494	AT1G05675	230	242	200	56	39	46	AT1G05675	137.023	226.67	47.376	0.209008	-2.25837	1.20487e-33	3.48351e-32
495	AT1G05680	3743	4394	3710	1099	967	960	AT1G05680	2487.24	3976.86	997.624	0.250857	-1.99506	1.64753e-208	7.86361e-206
496	AT1G05690	347	363	285	343	274	267	AT1G05690	313.38	334.859	291.901	0.871713	-0.198076	0.102272	0.224099
497	AT1G05700	88	145	97	8	12	12	AT1G05700	61.2465	110.925	11.5681	0.104288	-3.26135	3.88182e-19	6.05556e-18
498	AT1G05710	65	83	30	60	32	38	AT1G05710	51.7834	59.9013	43.6655	0.728958	-0.456092	0.297338	0.530835
499	AT1G05720	774	929	823	995	907	893	AT1G05720	885.551	849.338	921.763	1.08527	0.118057	0.142144	0.293924
500	AT1G05730	219	271	261	279	233	227	AT1G05730	248.921	253.573	244.268	0.963303	-0.0539379	0.707177	0.989832
501	AT1G05740	2	1	3	0	0	2	AT1G05740	2.36697	3.07823	1.65572	0.53788	-0.894643	0.612445	0.898958
502	AT1G05750	190	223	177	197	185	157	AT1G05750	188.645	198.792	178.499	0.89792	-0.155342	0.292193	0.52416
503	AT1G05760	19	40	26	9	16	6	AT1G05760	20.2334	29.2429	11.2239	0.383814	-1.38152	0.00199249	0.00694881
504	AT1G05770	8	7	2	0	2	0	AT1G05770	4.15686	6.658	1.65572	0.248681	-2.00763	0.0681447	0.158769
505	AT1G05780	327	412	355	392	391	346	AT1G05780	370.553	368.075	373.031	1.01346	0.0192951	0.882122	1
506	AT1G05785	219	275	176	233	234	185	AT1G05785	220.19	224.608	215.772	0.960658	-0.0579055	0.692939	0.978211
507	AT1G05790	982	1178	1089	1110	1007	945	AT1G05790	1051.27	1093.04	1009.5	0.923573	-0.114703	0.143311	0.295978
508	AT1G05800	15	20	6	31	16	21	AT1G05800	18.9263	14.5363	23.3163	1.60401	0.68168	0.153777	0.312821
509	AT1G05805	624	789	615	486	474	512	AT1G05805	583.24	680.146	486.335	0.715046	-0.483892	1.42435e-07	9.1642e-07
510	AT1G05810	916	1083	1011	1186	1077	1142	AT1G05810	1068.01	1013.02	1123.01	1.10858	0.148707	0.0478998	0.117044
511	AT1G05820	29	54	41	47	46	45	AT1G05820	44.4254	42.3763	46.4745	1.09671	0.133182	0.699156	0.984842
512	AT1G05830	583	663	580	757	772	680	AT1G05830	671.71	614.386	729.035	1.18661	0.246844	0.00519945	0.0165041
513	AT1G05835	37	58	35	75	83	68	AT1G05835	59.8742	44.247	75.5013	1.70636	0.770922	0.00327233	0.0108709
514	AT1G05840	591	651	517	811	721	654	AT1G05840	655.9	591.023	720.777	1.21954	0.286338	0.00228727	0.0078729
515	AT1G05850	4936	5894	5032	5587	5262	5057	AT1G05850	5283.21	5324.6	5241.83	0.984455	-0.0226034	0.666285	0.95436
516	AT1G05860	242	320	220	265	273	249	AT1G05860	261.296	262.171	260.421	0.993324	-0.00966312	0.895541	1
517	AT1G05870	915	1158	897	1376	1212	1241	AT1G05870	1128.87	995.478	1262.26	1.26799	0.342547	5.69077e-06	3.03694e-05
518	AT1G05880	4	0	8	2	5	3	AT1G05880	4.7673	5.2341	4.30049	0.82163	-0.28344	0.883569	1
519	AT1G05890	2093	2400	1959	2705	2536	2408	AT1G05890	2343.23	2165.42	2521.04	1.16423	0.219376	0.000466269	0.00184487
520	AT1G05894	25	20	18	23	19	6	AT1G05894	19.4937	22.2502	16.7373	0.752229	-0.410756	0.391868	0.65559
521	AT1G05900	283	385	291	260	242	259	AT1G05900	286.784	321.758	251.809	0.782605	-0.353643	0.00348763	0.0115039
522	AT1G05910	855	1013	731	1094	977	886	AT1G05910	922.689	870.699	974.679	1.11942	0.162753	0.146164	0.300704
523	AT1G05920	0	0	0	0	0	0	AT1G05920	1.00016	1.01126	0.989053	0.97804	-0.0320349	1	1
524	AT1G05925	0	0	0	0	0	0	AT1G05925	1.00016	1.01126	0.989053	0.97804	-0.0320349	1	1
525	AT1G05930	0	1	2	0	0	1	AT1G05930	1.6777	2.03301	1.32239	0.650458	-0.620472	0.837132	1
526	AT1G05940	953	1197	866	974	1013	890	AT1G05940	979.51	1009.69	949.326	0.940212	-0.0889423	0.335944	0.585315
527	AT1G05950	66	98	53	52	57	46	AT1G05950	62.5855	73.0846	52.0865	0.712687	-0.48866	0.0448014	0.110505
528	AT1G05960	1590	2022	1570	1944	1760	1694	AT1G05960	1757.59	1736.14	1779.04	1.02471	0.0352187	0.68738	0.973242
529	AT1G05970	50	101	57	101	99	81	AT1G05970	81.7353	69.9205	93.55	1.33795	0.420023	0.114607	0.246093
530	AT1G05990	4	0	0	0	0	0	AT1G05990	1.68998	2.39091	0.989053	0.413673	-1.27344	0.556099	0.842478
531	AT1G06000	4341	5218	4139	4623	4301	4257	AT1G06000	4467.92	4591.8	4344.05	0.946044	-0.0800215	0.136883	0.284843
532	AT1G06010	196	260	245	305	259	300	AT1G06010	261.092	236.534	285.65	1.20765	0.272204	0.0338608	0.0866293
533	AT1G06020	0	11	12	0	6	2	AT1G06020	6.17611	8.69649	3.65572	0.420367	-1.25028	0.262078	0.480757
534	AT1G06030	3	4	4	2	5	0	AT1G06030	4.00594	4.71139	3.30049	0.700535	-0.513472	0.688841	0.974298
535	AT1G06040	3124	3632	3143	5764	5564	5273	AT1G06040	4398.23	3324.9	5471.55	1.64563	0.718639	3.53428e-37	1.14605e-35
536	AT1G06050	150	208	186	173	150	176	AT1G06050	174.479	183.53	165.428	0.901372	-0.149806	0.328633	0.575329
537	AT1G06060	407	537	441	466	421	467	AT1G06060	456.161	465.101	447.221	0.961556	-0.0565568	0.559202	0.843983
538	AT1G06070	1015	1234	964	1193	986	939	AT1G06070	1052.34	1077.41	1027.26	0.953453	-0.0687668	0.495504	0.776358
539	AT1G06080	268	312	280	505	452	378	AT1G06080	365.218	289.976	440.461	1.51896	0.603082	4.45697e-06	2.40636e-05
540	AT1G06090	0	2	6	8	1	1	AT1G06090	4.00018	3.76555	4.23481	1.12462	0.169434	0.93259	1
541	AT1G06100	5	7	6	15	15	5	AT1G06100	9.76818	7.04486	12.4915	1.77314	0.826305	0.21466	0.410598
542	AT1G06110	879	998	831	1470	1360	1386	AT1G06110	1150.04	909.853	1390.23	1.52797	0.611618	2.48992e-16	3.27725e-15
543	AT1G06120	2	1	4	2	0	3	AT1G06120	3.03373	3.43363	2.63382	0.767067	-0.382575	0.867194	1
544	AT1G06130	895	1115	822	1426	1195	1277	AT1G06130	1116.63	948.554	1284.71	1.35439	0.437643	3.61431e-06	1.9777e-05
545	AT1G06135	357	414	368	593	530	535	AT1G06135	465.414	383.665	547.164	1.42615	0.512127	4.19677e-07	2.57678e-06
546	AT1G06137	20	17	33	51	31	26	AT1G06137	30.6773	24.9238	36.4307	1.46168	0.547632	0.19885	0.385623
547	AT1G06140	167	246	183	232	175	192	AT1G06140	199.129	200.143	198.116	0.989871	-0.0146869	0.909149	1
548	AT1G06148	2	10	9	1	5	4	AT1G06148	6.1603	8.00917	4.31144	0.538313	-0.893483	0.294475	0.527092
549	AT1G06149	442	528	461	601	511	494	AT1G06149	505.613	481.482	529.743	1.10023	0.137809	0.158657	0.321019
550	AT1G06150	521	618	567	685	602	599	AT1G06150	598.272	574.388	622.157	1.08316	0.115252	0.205555	0.396338
551	AT1G06160	6	17	9	0	2	2	AT1G06160	6.94392	11.5655	2.32239	0.200804	-2.31614	0.00543084	0.0171525
552	AT1G06170	23	35	34	28	32	28	AT1G06170	30.9634	31.911	30.0159	0.940611	-0.08833	0.830595	1
553	AT1G06180	30	27	25	28	32	30	AT1G06180	29.6609	28.6392	30.6825	1.07135	0.0994251	0.808767	1
554	AT1G06190	1497	1973	1601	2288	2277	2123	AT1G06190	1952.56	1699.84	2205.27	1.29734	0.375559	1.48402e-07	9.52673e-07
555	AT1G06200	1328	1627	1287	1607	1436	1430	AT1G06200	1448.38	1422.37	1474.4	1.03658	0.0518307	0.485471	0.765195
556	AT1G06210	1119	1478	1172	1525	1504	1487	AT1G06210	1376.35	1263.08	1489.63	1.17936	0.238008	0.00095422	0.00353724
557	AT1G06220	1261	1530	1199	1949	1872	1831	AT1G06220	1600.74	1337.82	1863.65	1.39305	0.478248	2.93708e-12	2.8962e-11
558	AT1G06225	0	0	0	7	2	0	AT1G06225	2.46184	1.01126	3.91242	3.86886	1.95191	0.20264	0.391466
559	AT1G06230	1859	2239	1794	2327	2209	2162	AT1G06230	2092.09	1976	2208.18	1.1175	0.160273	0.0136211	0.0389628
560	AT1G06240	97	124	92	179	140	149	AT1G06240	130.376	105.722	155.029	1.46639	0.552265	0.00186129	0.00652891
561	AT1G06250	30	63	33	60	53	68	AT1G06250	51.6711	42.6766	60.6655	1.42152	0.507432	0.0798613	0.181649
562	AT1G06260	23	30	24	73	56	82	AT1G06260	48.6628	26.8023	70.5232	2.63124	1.39574	1.7606e-06	1.00438e-05
563	AT1G06270	342	334	252	480	406	438	AT1G06270	374.728	312.389	437.068	1.39911	0.484514	2.86261e-05	0.000138208
564	AT1G06280	0	0	0	0	0	0	AT1G06280	1.00016	1.01126	0.989053	0.97804	-0.0320349	1	1
565	AT1G06290	21306	25350	20480	19046	17604	16811	AT1G06290	20061.8	22510.8	17612.8	0.782415	-0.353994	1.99302e-11	1.84869e-10
566	AT1G06310	11	29	18	34	24	22	AT1G06310	23.7518	20.22	27.2835	1.34933	0.432246	0.317849	0.560056
567	AT1G06320	11	11	5	10	12	4	AT1G06320	9.77449	10.0027	9.54624	0.954364	-0.0673879	0.963901	1
568	AT1G06330	0	4	0	0	2	0	AT1G06330	1.95539	2.25506	1.65572	0.734225	-0.445706	0.848764	1
569	AT1G06340	0	0	4	0	0	0	AT1G06340	1.71095	2.43286	0.989053	0.40654	-1.29853	0.554515	0.842447
570	AT1G06350	71	62	52	105	96	123	AT1G06350	85.5496	63.2596	107.84	1.70471	0.76953	0.000363237	0.00146926
571	AT1G06360	355	385	332	449	425	336	AT1G06360	380.285	361.163	399.407	1.10589	0.14521	0.225423	0.427467
572	AT1G06380	142	197	183	288	265	279	AT1G06380	225.727	176.284	275.17	1.56095	0.642421	2.98542e-06	1.65286e-05
573	AT1G06390	1024	1163	1008	1793	1679	1497	AT1G06390	1355.89	1074.08	1637.69	1.52474	0.608568	2.97083e-15	3.62441e-14
574	AT1G06400	3569	4342	3337	3459	3209	3028	AT1G06400	3481.62	3768.11	3195.12	0.847938	-0.23797	0.00077587	0.00293701
575	AT1G06410	6753	7624	6195	5844	5613	5463	AT1G06410	6239.79	6902.57	5577.01	0.807961	-0.307642	8.7637e-09	6.30254e-08
576	AT1G06420	27	33	39	25	32	39	AT1G06420	33.5806	34.4458	32.7154	0.949764	-0.0743583	0.865867	1
577	AT1G06430	3464	4171	3352	2665	2616	2514	AT1G06430	3127.1	3684.05	2570.15	0.697641	-0.519443	9.46642e-19	1.44201e-17
578	AT1G06440	117	165	125	150	128	121	AT1G06440	134.722	137.097	132.347	0.965349	-0.0508769	0.758743	1
579	AT1G06450	198	249	272	242	242	197	AT1G06450	234.369	243.399	225.34	0.925805	-0.11122	0.55796	0.843232
580	AT1G06460	232	274	254	381	339	351	AT1G06460	305.16	256.502	353.818	1.3794	0.464036	0.000108196	0.000477079
581	AT1G06470	783	938	749	936	861	819	AT1G06470	845.842	828.941	862.742	1.04078	0.0576594	0.502649	0.78475
582	AT1G06475	54	54	47	79	86	64	AT1G06475	64.7945	53.1315	76.4575	1.43902	0.525091	0.0330888	0.0848058
583	AT1G06490	39	60	27	60	70	58	AT1G06490	52.8572	42.7155	62.9989	1.47485	0.560565	0.048731	0.118847
584	AT1G06500	206	258	197	376	367	295	AT1G06500	282.587	222.302	342.873	1.54238	0.625155	2.11184e-06	1.19449e-05
585	AT1G06510	144	151	127	161	165	196	AT1G06510	157.997	142.768	173.227	1.21335	0.278991	0.0857731	0.192871
586	AT1G06515	268	337	255	387	387	324	AT1G06515	325.808	288.864	362.752	1.25579	0.328593	0.00561151	0.0176493
587	AT1G06520	429	533	421	80	83	93	AT1G06520	274.892	464.337	85.4466	0.184018	-2.44208	5.40654e-70	3.82053e-68
588	AT1G06530	1786	2183	1715	2305	2274	2234	AT1G06530	2076.05	1905.34	2246.76	1.17919	0.237798	0.000252525	0.00104808
589	AT1G06540	6	7	3	5	5	13	AT1G06540	7.46228	6.32357	8.60098	1.36015	0.443762	0.612363	0.898934
590	AT1G06550	495	567	416	503	416	420	AT1G06550	468.856	495.897	441.816	0.890943	-0.166595	0.113833	0.244702
591	AT1G06560	288	294	205	330	293	248	AT1G06560	276.166	264.622	287.71	1.08725	0.120683	0.478557	0.757308
592	AT1G06570	2549	3084	2509	2064	1908	1826	AT1G06570	2320.96	2730.86	1911.06	0.699803	-0.51498	1.24237e-16	1.67492e-15
593	AT1G06580	83	118	125	140	121	111	AT1G06580	117.106	110.756	123.456	1.11467	0.156619	0.408991	0.676413
594	AT1G06590	207	222	214	269	228	208	AT1G06590	225.269	217.494	233.044	1.0715	0.0996271	0.45134	0.726615
595	AT1G06620	475	570	541	281	268	212	AT1G06620	392.968	534.356	251.579	0.470808	-1.08679	2.78554e-20	4.655e-19
596	AT1G06630	380	423	362	467	477	373	AT1G06630	413.57	392.264	434.877	1.10863	0.148782	0.178388	0.35322
597	AT1G06640	337	427	385	457	455	451	AT1G06640	418.585	386.85	450.319	1.16407	0.219173	0.0387854	0.0975317
598	AT1G06645	22	48	26	79	88	94	AT1G06645	59.9447	32.7653	87.1242	2.65904	1.41091	1.27314e-07	8.23318e-07
599	AT1G06650	1448	1692	1404	1405	1376	1383	AT1G06650	1449.58	1525.55	1373.61	0.900402	-0.151359	0.0272656	0.0714839
600	AT1G06660	47	50	30	43	45	42	AT1G06660	43.6416	43.4315	43.8516	1.00967	0.0138877	1	1
601	AT1G06670	1407	1621	1344	2120	1941	1895	AT1G06670	1715.56	1468.01	1963.11	1.33726	0.419285	3.79205e-10	3.13671e-09
602	AT1G06680	4385	5345	4352	3450	3371	3077	AT1G06680	3992.36	4722.17	3262.55	0.690901	-0.533448	2.59594e-19	4.08474e-18
603	AT1G06690	423	548	482	554	511	520	AT1G06690	505.934	488.611	523.257	1.07091	0.0988333	0.321922	0.565776
604	AT1G06700	3220	3744	3064	3424	3032	3064	AT1G06700	3250.8	3364.76	3136.84	0.932261	-0.101194	0.0798165	0.181578
605	AT1G06710	143	200	154	157	180	158	AT1G06710	165.763	167.255	164.27	0.982155	-0.0259772	0.844312	1
606	AT1G06720	627	734	573	1051	1000	960	AT1G06720	821.151	649.151	993.15	1.52992	0.613457	1.60742e-13	1.75066e-12
607	AT1G06730	310	357	311	387	411	338	AT1G06730	352.445	329.472	375.419	1.13946	0.188346	0.0975485	0.215425
608	AT1G06750	24	42	28	44	26	37	AT1G06750	34.2371	32.3002	36.174	1.11993	0.163412	0.672238	0.9603
609	AT1G06760	7363	8584	6930	5320	4961	4899	AT1G06760	6337.72	7672.7	5002.75	0.652019	-0.617013	1.49659e-30	3.89629e-29
610	AT1G06770	247	252	212	372	337	329	AT1G06770	291.412	239.908	342.917	1.42937	0.515375	2.57977e-05	0.000125375
611	AT1G06780	605	822	625	636	603	646	AT1G06780	654.884	687.408	622.36	0.905372	-0.143417	0.121664	0.258352
612	AT1G06790	299	316	292	383	358	352	AT1G06790	333.653	306.176	361.13	1.17948	0.238153	0.0377415	0.0953031
613	AT1G06800	634	741	606	626	600	634	AT1G06800	639.803	665.471	614.136	0.92286	-0.115817	0.188074	0.369146
614	AT1G06810	2	2	0	0	0	0	AT1G06810	1.65602	2.32298	0.989053	0.425769	-1.23186	0.558714	0.843388
615	AT1G06820	535	568	400	570	572	541	AT1G06820	530.033	504.318	555.749	1.10198	0.1401	0.218498	0.416804
616	AT1G06830	4	7	7	3	1	1	AT1G06830	4.83911	7.05535	2.62288	0.371757	-1.42757	0.154063	0.313237
617	AT1G06840	556	628	472	591	594	535	AT1G06840	561.83	555.807	567.852	1.02167	0.030933	0.780956	1
618	AT1G06850	88	113	63	123	120	126	AT1G06850	105.767	88.8909	122.643	1.3797	0.464352	0.0204362	0.0555887
619	AT1G06870	642	762	614	490	508	425	AT1G06870	573.781	677.603	469.958	0.69356	-0.527908	1.41403e-08	1.0034e-07
620	AT1G06890	1806	2019	1767	2203	2022	1924	AT1G06890	1953.13	1879.72	2026.54	1.07811	0.108501	0.0914556	0.203729
621	AT1G06900	996	1075	881	1604	1554	1414	AT1G06900	1249.67	991.92	1507.43	1.51971	0.603794	1.1201e-16	1.5161e-15
622	AT1G06910	92	156	108	169	157	163	AT1G06910	140.887	119.634	162.139	1.35529	0.438599	0.0118943	0.0345132
623	AT1G06920	8	2	9	2	2	0	AT1G06920	4.94577	7.59104	2.30049	0.303053	-1.72236	0.0914498	0.203729
624	AT1G06923	16	2	4	0	2	0	AT1G06923	5.11453	8.57334	1.65572	0.193124	-2.3724	0.13296	0.277913
625	AT1G06925	8	1	2	0	0	0	AT1G06925	2.89068	4.7923	0.989053	0.206384	-2.2766	0.119426	0.254273
626	AT1G06930	4	12	8	4	4	6	AT1G06930	7.28871	8.96549	5.61193	0.625948	-0.675886	0.384141	0.646476
627	AT1G06950	2288	2685	2256	4169	3873	3632	AT1G06950	3136.77	2426.85	3846.68	1.58505	0.664531	4.11209e-29	1.00878e-27
628	AT1G06960	233	266	206	347	347	313	AT1G06960	285.079	237.3	332.857	1.40268	0.488188	8.98332e-05	0.000401446
629	AT1G06970	0	2	10	2	0	4	AT1G06970	4.07715	5.18715	2.96716	0.572021	-0.805861	0.623298	0.909638
630	AT1G06980	13	12	13	12	15	17	AT1G06980	14.6855	13.8467	15.5243	1.12116	0.164992	0.786369	1
631	AT1G06990	0	0	0	0	0	0	AT1G06990	1.00016	1.01126	0.989053	0.97804	-0.0320349	1	1
632	AT1G07000	3426	3887	3213	3174	2984	2993	AT1G07000	3274.91	3533.24	3016.58	0.853771	-0.228078	8.75336e-05	0.000392071
633	AT1G07010	414	598	481	345	342	364	AT1G07010	424.122	500.699	347.546	0.69412	-0.526743	6.60961e-05	0.000301663
634	AT1G07020	517	674	575	583	524	592	AT1G07020	577.102	593.265	560.94	0.945514	-0.0808299	0.373727	0.632588
635	AT1G07025	0	3	0	0	0	0	AT1G07025	1.46658	1.94411	0.989053	0.508744	-0.974989	0.682941	0.968571
636	AT1G07030	879	1108	956	906	941	982	AT1G07030	961.276	988.482	934.071	0.944955	-0.081683	0.281242	0.508363
637	AT1G07040	1552	2012	1639	1202	1149	1153	AT1G07040	1450.14	1744.44	1155.83	0.662578	-0.593837	2.49457e-14	2.87208e-13
638	AT1G07050	10	16	2	4	8	2	AT1G07050	7.87915	10.1464	5.61193	0.553098	-0.854394	0.280933	0.507946
639	AT1G07060	2	0	7	2	2	0	AT1G07060	3.24468	4.18888	2.30049	0.54919	-0.864622	0.557501	0.843232
640	AT1G07070	279	390	273	481	435	439	AT1G07070	381.463	315.536	447.39	1.41787	0.503729	6.21056e-06	3.29816e-05
641	AT1G07080	10982	13677	11031	19271	18068	17667	AT1G07080	15043.7	11962.1	18125.4	1.51523	0.599539	5.69299e-32	1.55662e-30
642	AT1G07090	437	389	357	321	340	297	AT1G07090	358.191	399.574	316.808	0.792864	-0.334854	0.00671135	0.0206853
643	AT1G07110	1099	1467	1292	1765	1716	1610	AT1G07110	1487.04	1295.41	1678.67	1.29586	0.37391	8.13904e-06	4.25665e-05
644	AT1G07120	56	77	34	72	60	88	AT1G07120	64.9436	56.353	73.5342	1.30489	0.383923	0.225866	0.428188
645	AT1G07130	2312	2648	2144	2383	2213	2102	AT1G07130	2295.69	2383.82	2207.57	0.926065	-0.110815	0.0717081	0.165667
646	AT1G07135	11497	14974	12275	14175	13307	13260	AT1G07135	13205.8	12985.1	13426.5	1.03399	0.0482191	0.507477	0.790655
647	AT1G07140	6469	7804	6313	6642	6194	6140	AT1G07140	6578.07	6902.53	6253.61	0.905988	-0.142436	0.00666	0.0205456
648	AT1G07150	2895	3420	2823	3604	3323	3263	AT1G07150	3212.23	3066.27	3358.2	1.09521	0.131204	0.0274597	0.0719165
649	AT1G07160	4983	5917	4952	3943	3601	3520	AT1G07160	4482.68	5319.53	3645.82	0.685366	-0.545054	1.86707e-22	3.43445e-21
650	AT1G07170	377	417	337	464	435	471	AT1G07170	416.527	380.478	452.576	1.18949	0.250346	0.0188815	0.0519509
651	AT1G07175	7	9	7	8	2	2	AT1G07175	6.80673	8.71198	4.90147	0.562613	-0.829785	0.318552	0.561123
652	AT1G07180	60	85	46	110	77	83	AT1G07180	77.1349	64.485	89.7848	1.39234	0.477508	0.0508199	0.123293
653	AT1G07190	0	0	0	0	0	0	AT1G07190	1.00016	1.01126	0.989053	0.97804	-0.0320349	1	1
654	AT1G07200	411	479	421	504	426	434	AT1G07200	445.738	441.338	450.138	1.01994	0.0284851	0.782219	1
655	AT1G07210	956	1266	1011	1287	1185	1186	AT1G07210	1144.98	1083.72	1206.23	1.11305	0.15452	0.043211	0.106921
656	AT1G07220	446	526	397	727	575	654	AT1G07220	552.262	459.495	645.03	1.40378	0.489319	1.11739e-05	5.73037e-05
657	AT1G07230	1024	1320	1038	1552	1546	1355	AT1G07230	1300.95	1133.56	1468.33	1.29533	0.37332	1.72771e-05	8.61354e-05
658	AT1G07240	2361	3060	2318	2178	2039	2055	AT1G07240	2329.24	2590.67	2067.81	0.798177	-0.325219	7.22091e-05	0.000327693
659	AT1G07250	724	813	665	828	849	903	AT1G07250	795.897	739.869	851.925	1.15145	0.203455	0.0159831	0.0448053
660	AT1G07260	106	58	78	152	173	130	AT1G07260	117.16	83.3281	150.992	1.81201	0.857595	0.000624671	0.00241506
661	AT1G07270	14	19	19	22	11	17	AT1G07270	17.9578	18.5006	17.4149	0.941312	-0.0872553	0.9046	1
662	AT1G07280	141	159	149	203	200	170	AT1G07280	170.903	152.039	189.767	1.24814	0.319784	0.0382302	0.0963404
663	AT1G07290	46	58	46	40	68	61	AT1G07290	54.0726	51.2606	56.8845	1.10971	0.150185	0.616806	0.903215
664	AT1G07300	33	56	63	58	57	44	AT1G07300	52.7754	52.1967	53.3541	1.02217	0.0316419	0.924925	1
665	AT1G07310	1558	1944	1544	1510	1394	1360	AT1G07310	1548.7	1691.61	1405.79	0.83104	-0.26701	7.62135e-05	0.000344601
666	AT1G07320	1671	2108	1672	3341	3250	3052	AT1G07320	2502.91	1827.07	3178.75	1.73981	0.798929	9.31128e-38	3.05945e-36
667	AT1G07330	2	4	4	0	0	6	AT1G07330	3.67776	4.36648	2.98905	0.684546	-0.546782	0.677802	0.966471
668	AT1G07340	4	0	1	0	0	0	AT1G07340	1.86768	2.74631	0.989053	0.360139	-1.47337	0.450933	0.726462
669	AT1G07350	1110	1414	1021	1020	970	927	AT1G07350	1074.28	1186.41	962.156	0.810982	-0.302258	0.0012969	0.00468945
670	AT1G07360	1392	1655	1176	1947	1832	1714	AT1G07360	1612.19	1413.7	1810.67	1.28081	0.357052	7.09039e-05	0.000322308
671	AT1G07370	404	370	395	343	329	367	AT1G07370	369.678	395.789	343.567	0.868056	-0.20414	0.0758703	0.173836
672	AT1G07380	1534	1718	1508	2103	1755	1680	AT1G07380	1712.11	1600.26	1823.97	1.13979	0.188774	0.0365146	0.0925486
673	AT1G07390	70	80	101	135	132	75	AT1G07390	99.7187	85.9263	113.511	1.32103	0.401662	0.200607	0.388063
674	AT1G07400	201	274	246	52	39	80	AT1G07400	150.193	242.967	57.4198	0.236328	-2.08114	6.13537e-22	1.10396e-20
675	AT1G07410	87	130	107	125	119	105	AT1G07410	112.712	109.47	115.954	1.05923	0.0830206	0.689635	0.975167
676	AT1G07420	325	455	307	549	548	504	AT1G07420	446.171	363.697	528.646	1.45353	0.539564	1.2119e-06	7.06166e-06
677	AT1G07430	1542	1770	1661	3424	3285	3125	AT1G07430	2457.53	1673.56	3241.5	1.93689	0.953741	5.47039e-53	2.78703e-51
678	AT1G07440	356	446	395	136	84	56	AT1G07440	247.183	402.866	91.5002	0.227123	-2.13845	1.07189e-34	3.22231e-33
679	AT1G07450	0	0	0	0	0	0	AT1G07450	1.00016	1.01126	0.989053	0.97804	-0.0320349	1	1
680	AT1G07460	0	0	0	0	0	0	AT1G07460	1.00016	1.01126	0.989053	0.97804	-0.0320349	1	1
681	AT1G07470	616	765	606	730	731	683	AT1G07470	687.194	666.725	707.664	1.0614	0.0859731	0.351963	0.605341
682	AT1G07473	25	21	18	38	33	20	AT1G07473	26.7338	22.5612	30.9064	1.36989	0.454063	0.237715	0.445496
683	AT1G07476	14	13	13	10	11	5	AT1G07476	12.0244	14.5026	9.54624	0.658246	-0.603302	0.321323	0.565016
684	AT1G07480	612	750	600	719	715	637	AT1G07480	671	658.549	683.451	1.03781	0.0535483	0.57359	0.859547
685	AT1G07485	4	0	0	0	7	1	AT1G07485	3.02331	2.39091	3.65572	1.52901	0.612598	0.723074	1
686	AT1G07490	4	0	0	0	6	2	AT1G07490	3.02331	2.39091	3.65572	1.52901	0.612598	0.68654	0.972508
687	AT1G07500	116	163	106	149	138	109	AT1G07500	130.368	129.378	131.358	1.0153	0.0219099	0.960191	1
688	AT1G07510	2269	2542	2223	3108	2908	2803	AT1G07510	2635.37	2364.1	2906.63	1.22949	0.298056	9.28237e-07	5.48634e-06
689	AT1G07520	531	724	600	855	816	734	AT1G07520	707.911	622.526	793.296	1.27432	0.349724	0.000375406	0.00151375
690	AT1G07530	2160	2670	2129	2844	2522	2513	AT1G07530	2464.54	2332.9	2596.19	1.11286	0.15427	0.0207527	0.0563078
691	AT1G07540	24	17	11	7	9	9	AT1G07540	13.8652	18.4847	9.24575	0.500185	-0.999466	0.0674872	0.157498
692	AT1G07550	0	0	0	0	0	0	AT1G07550	1.00016	1.01126	0.989053	0.97804	-0.0320349	1	1
693	AT1G07560	0	0	0	0	0	0	AT1G07560	1.00016	1.01126	0.989053	0.97804	-0.0320349	1	1
694	AT1G07570	375	438	359	455	441	416	AT1G07570	413.739	394.137	433.341	1.09947	0.136806	0.205193	0.395753
695	AT1G07590	58790	73905	60892	23359	21254	20750	AT1G07590	43216.5	64900	21532.9	0.331786	-1.59167	1.69251e-83	1.63285e-81
696	AT1G07600	14635	19046	15857	5854	5392	5055	AT1G07600	10988.6	16606.7	5370.57	0.323398	-1.62862	1.22352e-52	6.18717e-51
697	AT1G07610	8572	10494	8430	2913	2812	2684	AT1G07610	5994.4	9216.71	2772.1	0.300769	-1.73327	3.41474e-126	6.83099e-124
698	AT1G07615	161	173	154	335	319	312	AT1G07615	242.195	165.068	319.322	1.93449	0.951952	1.28529e-12	1.2975e-11
699	AT1G07620	1791	2243	1694	1840	1696	1783	AT1G07620	1836.05	1918.25	1753.85	0.914293	-0.129271	0.0664873	0.155451
700	AT1G07630	3327	4133	3243	3679	3587	3283	AT1G07630	3531.65	3586.25	3477.05	0.969551	-0.0446116	0.475883	0.755039
701	AT1G07640	37	35	34	42	29	46	AT1G07640	38.1345	36.7398	39.5293	1.07593	0.105578	0.753582	1
702	AT1G07645	487	494	447	1558	1461	1561	AT1G07645	996.028	481.456	1510.6	3.13757	1.64965	5.1331e-93	5.91742e-91
703	AT1G07650	401	430	340	407	408	357	AT1G07650	390.532	393.865	387.2	0.983079	-0.0246208	0.815019	1
704	AT1G07660	1249	1398	1208	1086	1062	997	AT1G07660	1166.63	1295.84	1037.43	0.800591	-0.320863	1.3809e-05	6.98433e-05
705	AT1G07670	4349	5018	4063	5008	4420	4170	AT1G07670	4492.1	4505.36	4478.83	0.994111	-0.00852088	0.89179	1
706	AT1G07680	54	48	60	21	23	18	AT1G07680	38.6559	55.886	21.4258	0.383384	-1.38314	2.62425e-05	0.000127355
707	AT1G07690	675	781	629	190	141	139	AT1G07690	427.9	700.224	155.576	0.22218	-2.1702	1.24207e-82	1.17332e-80
708	AT1G07700	693	866	651	637	585	589	AT1G07700	669.182	740.682	597.682	0.806935	-0.309476	0.000369431	0.00149209
709	AT1G07705	566	722	642	759	688	561	AT1G07705	655.458	648.903	662.013	1.0202	0.0288576	0.829754	1
710	AT1G07710	17	18	26	24	20	24	AT1G07710	22.5526	21.7122	23.393	1.07741	0.107568	0.804384	1
711	AT1G07720	196	193	146	97	113	109	AT1G07720	143.388	180.515	106.26	0.58865	-0.764517	5.52945e-06	2.95549e-05
712	AT1G07725	361	386	287	482	394	422	AT1G07725	387.965	347.55	428.379	1.23257	0.301666	0.00653527	0.0202044
713	AT1G07730	37	76	44	62	49	56	AT1G07730	54.5098	53.0427	55.977	1.05532	0.0776793	0.850997	1
714	AT1G07740	119	137	89	128	93	109	AT1G07740	112.937	116.286	109.588	0.942396	-0.0855944	0.639498	0.92726
715	AT1G07745	118	121	97	103	145	109	AT1G07745	116.335	113.809	118.861	1.04439	0.0626612	0.765838	1
716	AT1G07747	0	0	0	0	0	0	AT1G07747	1.00016	1.01126	0.989053	0.97804	-0.0320349	1	1
717	AT1G07750	733	855	776	1283	1068	1144	AT1G07750	973.713	795.483	1151.94	1.44811	0.534167	2.51753e-11	2.31862e-10
718	AT1G07770	2653	3102	2445	4710	4419	4055	AT1G07770	3546.84	2749.58	4344.09	1.57991	0.659845	5.39844e-21	9.28969e-20
719	AT1G07780	288	317	308	423	380	360	AT1G07780	346.202	308.38	384.025	1.2453	0.316492	0.00493006	0.0157537
720	AT1G07790	1693	2201	1700	1693	1613	1606	AT1G07790	1746.66	1873.52	1619.79	0.864567	-0.20995	0.00495969	0.0158373
721	AT1G07795	26	23	20	13	8	7	AT1G07795	17.2094	24.2388	10.1801	0.419991	-1.25157	0.0112691	0.0328886
722	AT1G07810	3136	3534	2953	3177	2881	2958	AT1G07810	3101.29	3231.04	2971.54	0.919685	-0.120788	0.0394333	0.0988413
723	AT1G07820	1817	2355	2058	1845	1714	1699	AT1G07820	1912.44	2091.41	1733.46	0.828845	-0.270825	0.000896084	0.00334644
724	AT1G07830	436	568	432	744	732	663	AT1G07830	593.694	481.544	705.844	1.46579	0.551681	3.50893e-09	2.63131e-08
725	AT1G07840	412	506	448	637	548	510	AT1G07840	509.345	459.674	559.016	1.21611	0.282277	0.00454006	0.014633
726	AT1G07850	5	4	5	0	0	3	AT1G07850	3.87283	5.75661	1.98905	0.345525	-1.53314	0.181757	0.359072
727	AT1G07860	0	12	9	0	0	0	AT1G07860	4.46515	7.94125	0.989053	0.124546	-3.00525	0.0327795	0.0841004
728	AT1G07870	638	802	663	682	704	677	AT1G07870	693.633	706.076	681.19	0.964754	-0.0517668	0.529407	0.815159
729	AT1G07880	4	0	2	0	0	0	AT1G07880	2.04538	3.1017	0.989053	0.318874	-1.64894	0.362774	0.619407
730	AT1G07885	0	0	0	0	0	0	AT1G07885	1.00016	1.01126	0.989053	0.97804	-0.0320349	1	1
731	AT1G07890	16406	19103	15582	13023	12605	12227	AT1G07890	14807.1	17137.5	12476.8	0.728037	-0.457916	9.72133e-20	1.5696e-18
732	AT1G07900	0	1	1	1	0	0	AT1G07900	1.49452	1.67761	1.31144	0.781731	-0.355256	0.985983	1
733	AT1G07901	15	38	30	32	36	33	AT1G07901	31.4842	28.663	34.3054	1.19685	0.259247	0.50222	0.784184
734	AT1G07910	317	440	341	498	477	495	AT1G07910	426.947	368.357	485.537	1.31812	0.398477	0.000178834	0.000762795
735	AT1G07920	13184	15211	12369	20665	19378	18872	AT1G07920	16543.6	13674.1	19413.1	1.4197	0.505583	1.63294e-23	3.14407e-22
736	AT1G07930	10557	12337	9658	16928	15985	15658	AT1G07930	13458.4	10910.9	16006	1.46698	0.552847	3.75771e-27	8.52646e-26
737	AT1G07940	11986	14104	11347	18197	17278	16919	AT1G07940	14910	12553.5	17266.4	1.37543	0.459885	1.66204e-19	2.6443e-18
738	AT1G07950	650	679	564	711	653	639	AT1G07950	648.828	636.783	660.872	1.03783	0.0535681	0.551826	0.840169
739	AT1G07960	1258	1435	1186	1524	1328	1261	AT1G07960	1328.97	1302.63	1355.31	1.04044	0.0571951	0.434225	0.707185
740	AT1G07970	222	303	210	348	336	330	AT1G07970	290.806	246.433	335.179	1.36012	0.443737	0.00039141	0.00157269
741	AT1G07980	809	1020	815	1013	948	1007	AT1G07980	933.048	886.863	979.233	1.10415	0.14294	0.079084	0.180137
742	AT1G07985	5859	7512	5727	10562	9660	9530	AT1G07985	8097.88	6393.07	9802.7	1.53333	0.61667	5.09103e-20	8.37404e-19
743	AT1G07990	2215	2730	2106	2526	2518	2368	AT1G07990	2403.18	2362.35	2444	1.03456	0.0490214	0.476508	0.755779
744	AT1G08000	260	329	281	369	267	304	AT1G08000	301.57	292.858	310.283	1.0595	0.0833835	0.54839	0.835919
745	AT1G08005	4	0	1	2	1	3	AT1G08005	2.85673	2.74631	2.96716	1.08042	0.11159	1	1
746	AT1G08010	272	327	245	370	355	312	AT1G08010	313.093	283.58	342.605	1.20814	0.272789	0.0239388	0.0638758
747	AT1G08030	464	549	470	564	562	562	AT1G08030	528.14	498.799	557.481	1.11765	0.160465	0.0999778	0.219686
748	AT1G08032	0	0	0	0	0	0	AT1G08032	1.00016	1.01126	0.989053	0.97804	-0.0320349	1	1
749	AT1G08035	6	2	1	5	2	4	AT1G08035	4.3295	4.05803	4.60098	1.1338	0.181163	0.929222	1
750	AT1G08040	586	737	582	914	896	798	AT1G08040	749.729	639.141	860.316	1.34605	0.428732	5.82024e-07	3.51566e-06
751	AT1G08050	766	927	689	457	533	469	AT1G08050	640.326	798.334	482.319	0.604158	-0.727003	3.23157e-12	3.18083e-11
752	AT1G08060	652	754	590	771	755	765	AT1G08060	713.125	670.035	756.215	1.12862	0.174561	0.048103	0.117456
753	AT1G08065	0	0	0	0	0	0	AT1G08065	1.00016	1.01126	0.989053	0.97804	-0.0320349	1	1
754	AT1G08070	42	53	49	84	59	56	AT1G08070	57.8976	49.3924	66.4028	1.34439	0.426954	0.099656	0.219161
755	AT1G08080	2	0	0	2	5	2	AT1G08080	2.83412	1.70108	3.96716	2.33214	1.22165	0.384671	0.647048
756	AT1G08090	43	44	19	38	37	22	AT1G08090	34.5916	36.2768	32.9064	0.907091	-0.14068	0.714175	0.996862
757	AT1G08100	3	3	0	0	0	0	AT1G08100	1.98395	2.97884	0.989053	0.332026	-1.59063	0.367463	0.624746
758	AT1G08110	1169	1414	1087	1659	1556	1484	AT1G08110	1389.69	1230.21	1549.16	1.25926	0.332577	3.01344e-06	1.66735e-05
759	AT1G08120	6	15	15	12	11	12	AT1G08120	12.8002	13.076	12.5243	0.957815	-0.0621808	0.958816	1
760	AT1G08125	333	369	350	522	423	433	AT1G08125	404.802	354.997	454.608	1.2806	0.356816	0.000740883	0.00282067
761	AT1G08130	511	637	488	739	645	641	AT1G08130	608.335	548.771	667.899	1.21708	0.283427	0.00223156	0.00770162
762	AT1G08135	0	0	0	0	0	0	AT1G08135	1.00016	1.01126	0.989053	0.97804	-0.0320349	1	1
763	AT1G08140	0	0	0	0	0	0	AT1G08140	1.00016	1.01126	0.989053	0.97804	-0.0320349	1	1
764	AT1G08150	0	0	0	0	0	0	AT1G08150	1.00016	1.01126	0.989053	0.97804	-0.0320349	1	1
765	AT1G08160	30	22	18	30	23	29	AT1G08160	26.2953	24.5967	27.994	1.13812	0.186652	0.644962	0.933089
766	AT1G08165	0	0	0	0	3	0	AT1G08165	1.50016	1.01126	1.98905	1.96691	0.975927	0.706454	0.989832
767	AT1G08170	144	215	178	202	155	199	AT1G08170	182.452	180.794	184.111	1.01835	0.0262316	0.906736	1
768	AT1G08180	180	236	211	390	322	275	AT1G08180	268.594	211.469	325.72	1.54027	0.623187	0.000314596	0.00128339
769	AT1G08190	5226	6187	4980	6951	6312	6113	AT1G08190	5940.41	5497.25	6383.56	1.16123	0.215651	0.000118642	0.000519602
770	AT1G08200	5894	6869	5552	5604	5080	4941	AT1G08200	5645.49	6143.01	5147.97	0.838022	-0.254941	2.31444e-06	1.30123e-05
771	AT1G08210	338	391	348	632	522	567	AT1G08210	465.294	362.851	567.737	1.56465	0.645844	1.91118e-10	1.62537e-09
772	AT1G08220	194	232	170	257	246	206	AT1G08220	217.496	200.482	234.509	1.16972	0.226168	0.112216	0.241762
773	AT1G08230	2967	3627	2808	2397	2330	2288	AT1G08230	2731.61	3150.14	2313.08	0.734279	-0.445599	1.38178e-12	1.39027e-11
774	AT1G08250	152	130	121	172	213	227	AT1G08250	169.985	136.865	203.106	1.48399	0.569485	0.00185941	0.00652315
775	AT1G08260	355	342	307	364	367	374	AT1G08260	352.122	338.907	365.338	1.07799	0.10834	0.333229	0.581197
776	AT1G08270	132	124	147	139	155	134	AT1G08270	139.738	137.341	142.134	1.0349	0.0494898	0.743663	1
777	AT1G08280	296	382	280	357	317	366	AT1G08280	332.573	321.399	343.747	1.06953	0.0969815	0.439553	0.713044
778	AT1G08290	0	0	0	0	3	0	AT1G08290	1.50016	1.01126	1.98905	1.96691	0.975927	0.706454	0.989832
779	AT1G08300	55	69	60	77	62	85	AT1G08300	68.7868	62.7608	74.8128	1.19203	0.25342	0.298411	0.532261
780	AT1G08310	85	105	73	82	66	81	AT1G08310	82.6736	88.9226	76.4247	0.859452	-0.218511	0.309081	0.547522
781	AT1G08315	1191	1532	1134	1100	1071	1052	AT1G08315	1177.24	1291.2	1063.28	0.823483	-0.280188	0.000864422	0.00323887
782	AT1G08320	3674	4079	3582	4535	4467	4316	AT1G08320	4100.15	3809.62	4390.68	1.15252	0.204796	0.000293065	0.0012015
783	AT1G08340	47	59	44	63	69	51	AT1G08340	56.2525	51.2057	61.2994	1.19712	0.259568	0.344148	0.595811
784	AT1G08350	242	324	247	320	309	324	AT1G08350	294.082	273.011	315.153	1.15436	0.207091	0.100634	0.220937
785	AT1G08360	4670	5654	4519	8000	7061	7036	AT1G08360	6127.49	4975.9	7279.08	1.46286	0.548797	3.67825e-17	5.13181e-16
786	AT1G08370	737	999	827	1042	985	1004	AT1G08370	929.84	859.765	999.915	1.16301	0.217864	0.00683287	0.0210027
787	AT1G08380	686	872	760	417	449	416	AT1G08380	601.315	778.872	423.757	0.544066	-0.878148	2.14154e-21	3.7833e-20
788	AT1G08390	20	38	26	38	33	30	AT1G08390	31.6028	28.9659	34.2397	1.18207	0.241313	0.532485	0.818647
789	AT1G08400	163	181	135	233	203	218	AT1G08400	188.965	161.493	216.438	1.34024	0.422488	0.00471232	0.0151254
790	AT1G08410	507	607	448	709	705	698	AT1G08410	610.537	523.846	697.227	1.33098	0.412485	8.51144e-06	4.43606e-05
791	AT1G08420	2405	2803	2220	2391	2288	2165	AT1G08420	2373.62	2491.1	2256.15	0.905683	-0.142922	0.0188124	0.0518027
792	AT1G08430	8	6	5	5	6	3	AT1G08430	6.50711	7.41324	5.60098	0.755537	-0.404425	0.668949	0.956984
793	AT1G08440	0	1	0	0	0	0	AT1G08440	1.15563	1.32221	0.989053	0.74803	-0.418832	0.987654	1
794	AT1G08450	656	842	651	948	895	862	AT1G08450	806.367	720.457	892.278	1.23849	0.308579	0.000245917	0.00102269
795	AT1G08460	802	996	803	957	948	863	AT1G08460	892.95	872.721	913.179	1.04636	0.0653765	0.441778	0.715724
796	AT1G08465	41	55	36	62	52	49	AT1G08465	49.8464	45.0492	54.6436	1.21298	0.278552	0.343131	0.594524
797	AT1G08470	237	224	156	326	315	306	AT1G08470	260.469	207.85	313.087	1.50631	0.591019	5.07415e-06	2.72498e-05
798	AT1G08480	3217	3797	3153	3785	3304	3416	AT1G08480	3436.53	3411.84	3461.22	1.01447	0.0207305	0.738804	1
799	AT1G08490	944	981	736	965	919	874	AT1G08490	901.49	893.223	909.758	1.01851	0.0264628	0.805775	1
800	AT1G08500	346	430	373	694	602	614	AT1G08500	508.34	386.623	630.058	1.62965	0.704559	8.06071e-13	8.25988e-12
801	AT1G08510	1246	1519	1256	1855	1753	1668	AT1G08510	1544.42	1349.48	1739.35	1.2889	0.366138	1.07032e-07	6.98467e-07
802	AT1G08520	1334	1548	1276	2064	1803	1798	AT1G08520	1631.34	1395.96	1866.73	1.33723	0.419251	6.10137e-10	4.93442e-09
803	AT1G08530	223	221	187	302	232	230	AT1G08530	232.728	213.106	252.35	1.18415	0.243853	0.0793162	0.18056
804	AT1G08540	866	1040	834	1070	902	928	AT1G08540	937.718	919.495	955.942	1.03964	0.0560815	0.495728	0.776664
805	AT1G08550	406	522	417	605	550	423	AT1G08550	485.964	451.562	520.366	1.15237	0.204601	0.20121	0.38909
806	AT1G08560	87	83	65	104	86	118	AT1G08560	91.2227	79.9283	102.517	1.28261	0.359087	0.0869065	0.195
807	AT1G08570	1345	1435	1283	3307	2982	2833	AT1G08570	2186.28	1367.11	3005.45	2.1984	1.13646	3.19155e-56	1.74007e-54
808	AT1G08580	571	655	514	701	659	616	AT1G08580	618.142	584.303	651.982	1.11583	0.158115	0.0875285	0.196136
809	AT1G08590	3515	4082	3397	3780	3590	3240	AT1G08590	3593.12	3689.96	3496.27	0.94751	-0.0777874	0.171157	0.341086
810	AT1G08600	1068	1180	987	1519	1445	1249	AT1G08600	1237.88	1087.08	1388.69	1.27746	0.353275	2.56901e-05	0.000124942
811	AT1G08610	212	245	256	427	370	307	AT1G08610	302.806	241.297	364.314	1.50982	0.594373	0.000349915	0.0014198
812	AT1G08620	1601	1949	1530	2037	1816	1686	AT1G08620	1764.02	1703.02	1825.02	1.07164	0.0998225	0.241012	0.450312
813	AT1G08630	101	97	104	242	356	267	AT1G08630	194.822	102.971	286.673	2.78402	1.47717	1.58322e-07	1.01229e-06
814	AT1G08640	911	1131	855	1457	1248	1257	AT1G08640	1138.24	970.776	1305.71	1.34501	0.427619	1.00506e-06	5.9083e-06
815	AT1G08650	2598	3163	2411	6803	6113	5950	AT1G08650	4476.34	2737.49	6215.18	2.27039	1.18294	2.8118e-60	1.69243e-58
816	AT1G08660	539	601	483	991	819	899	AT1G08660	719.299	545.457	893.14	1.63742	0.711421	3.57772e-16	4.66389e-15
817	AT1G08670	4	0	5	20	21	25	AT1G08670	13.469	4.1679	22.7701	5.46321	2.44975	3.55741e-05	0.000169201
818	AT1G08680	1456	1581	1386	1950	1811	1958	AT1G08680	1686.69	1487.4	1885.97	1.26797	0.342521	3.09534e-07	1.92572e-06
819	AT1G08695	0	0	0	0	0	0	AT1G08695	1.00016	1.01126	0.989053	0.97804	-0.0320349	1	1
820	AT1G08700	1263	1276	1170	1520	1565	1404	AT1G08700	1364.95	1249.22	1480.68	1.18528	0.245231	0.000463617	0.00183571
821	AT1G08710	328	355	292	418	350	417	AT1G08710	359.859	328.306	391.413	1.19222	0.253651	0.0241702	0.0643923
822	AT1G08720	894	1059	838	1144	984	1030	AT1G08720	988.807	936.482	1041.13	1.11175	0.15283	0.0528284	0.127461
823	AT1G08730	42	24	17	30	15	22	AT1G08730	25.998	29.0021	22.994	0.792837	-0.334903	0.534719	0.821248
824	AT1G08750	329	366	310	418	348	396	AT1G08750	361.107	338.468	383.746	1.13377	0.181132	0.106428	0.231431
825	AT1G08760	827	1018	859	910	885	941	AT1G08760	905.557	908.087	903.027	0.994427	-0.00806226	0.897987	1
826	AT1G08770	429	480	441	402	359	351	AT1G08770	411.11	454.965	367.255	0.807216	-0.308974	0.00387878	0.0126515
827	AT1G08780	576	780	579	799	737	648	AT1G08780	684.119	647.997	720.242	1.11149	0.152495	0.209577	0.402467
828	AT1G08790	0	0	0	0	0	0	AT1G08790	1.00016	1.01126	0.989053	0.97804	-0.0320349	1	1
829	AT1G08800	1737	2120	1680	1479	1353	1307	AT1G08800	1610.44	1856.41	1364.46	0.735003	-0.444177	4.2025e-11	3.78336e-10
830	AT1G08810	2	4	0	6	2	0	AT1G08810	3.26746	2.94488	3.59003	1.21908	0.285789	0.914311	1
831	AT1G08820	1709	1978	1602	1656	1617	1529	AT1G08820	1679.2	1774.87	1583.53	0.892192	-0.164574	0.0127222	0.0366653
832	AT1G08830	1426	1829	1489	1178	1152	1008	AT1G08830	1345.77	1590.77	1100.76	0.691966	-0.531227	8.88871e-10	7.0813e-09
833	AT1G08840	153	175	135	155	150	155	AT1G08840	154.402	156.178	152.626	0.977255	-0.0331926	0.833118	1
834	AT1G08845	85	117	69	101	111	83	AT1G08845	94.7245	91.2324	98.2167	1.07656	0.106423	0.661685	0.949613
835	AT1G08860	181	209	194	161	146	149	AT1G08860	174.301	197.376	151.227	0.766185	-0.384236	0.0129151	0.0371583
836	AT1G08880	1829	2186	1887	1550	1497	1422	AT1G08880	1727.96	1982.23	1473.69	0.74345	-0.427693	1.24833e-10	1.07608e-09
837	AT1G08890	379	421	398	888	815	857	AT1G08890	624.346	404.091	844.601	2.09012	1.06359	5.71205e-31	1.50876e-29
838	AT1G08900	7	3	5	3	2	13	AT1G08900	6.54585	6.13548	6.95621	1.13377	0.181124	0.886822	1
839	AT1G08910	610	707	577	1250	1071	1054	AT1G08910	874.309	636.314	1112.3	1.74804	0.805742	2.11381e-21	3.73673e-20
840	AT1G08920	1356	1530	1211	481	439	413	AT1G08920	907.454	1374.85	440.057	0.320076	-1.64352	1.82993e-87	1.8858e-85
841	AT1G08930	9458	11911	9426	8298	7703	7377	AT1G08930	9009.85	10316.9	7702.81	0.746621	-0.421551	2.91621e-09	2.19652e-08
842	AT1G08940	690	725	532	404	377	356	AT1G08940	514.539	653.511	375.566	0.57469	-0.799144	3.64522e-10	3.02077e-09
843	AT1G08960	224	184	144	264	224	240	AT1G08960	213.715	186.664	240.766	1.28984	0.367189	0.0321953	0.0828118
844	AT1G08970	1731	1877	1609	1929	1792	1923	AT1G08970	1807.37	1753.54	1861.2	1.0614	0.0859645	0.193347	0.377373
845	AT1G08980	136	206	199	420	425	375	AT1G08980	292.879	182.699	403.058	2.20613	1.14152	2.12123e-18	3.16741e-17
846	AT1G08985	2	0	2	0	0	0	AT1G08985	1.70047	2.41188	0.989053	0.410075	-1.28604	0.555304	0.842447
847	AT1G08990	0	0	0	0	0	0	AT1G08990	1.00016	1.01126	0.989053	0.97804	-0.0320349	1	1
848	AT1G09000	21	23	12	21	20	11	AT1G09000	18.8818	19.671	18.0925	0.919753	-0.120681	0.814831	1
849	AT1G09010	1403	1697	1379	2157	1755	1905	AT1G09010	1709.54	1502.7	1916.38	1.27529	0.350824	7.50142e-05	0.000339517
850	AT1G09020	1292	1528	1262	1327	1158	1216	AT1G09020	1295.2	1370.28	1220.13	0.890422	-0.167439	0.0184674	0.0509557
851	AT1G09026	0	0	0	0	0	0	AT1G09026	1.00016	1.01126	0.989053	0.97804	-0.0320349	1	1
852	AT1G09030	0	0	0	0	0	0	AT1G09030	1.00016	1.01126	0.989053	0.97804	-0.0320349	1	1
853	AT1G09040	122	165	139	161	213	154	AT1G09040	159.512	143.798	175.227	1.21856	0.285182	0.148523	0.304385
854	AT1G09050	79	98	78	90	102	103	AT1G09050	92.3953	86.4534	98.3371	1.13746	0.185813	0.392042	0.655758
855	AT1G09060	845	975	781	875	834	822	AT1G09060	854.14	873.204	835.077	0.956336	-0.0644098	0.412292	0.68055
856	AT1G09070	30870	37048	29650	31455	30058	29001	AT1G09070	31267	32706.1	29828	0.912001	-0.132892	0.00573949	0.0180034
857	AT1G09080	12	7	23	6	4	2	AT1G09080	10.2122	15.501	4.92337	0.317616	-1.65465	0.0563229	0.134662
858	AT1G09090	275	307	272	484	416	443	AT1G09090	365.675	287.992	443.357	1.53948	0.622441	2.4366e-08	1.6842e-07
859	AT1G09100	1424	1622	1340	2022	1950	1947	AT1G09100	1712.31	1472.76	1951.85	1.3253	0.406322	1.38857e-09	1.08493e-08
860	AT1G09130	2239	2630	2123	2396	2151	2198	AT1G09130	2284.33	2345.58	2223.09	0.94778	-0.0773753	0.203798	0.393313
861	AT1G09140	2254	2634	2179	2139	1799	1880	AT1G09140	2144.4	2371.9	1916.91	0.808174	-0.307262	1.16744e-06	6.81426e-06
862	AT1G09150	454	605	468	643	568	620	AT1G09150	558.168	512.052	604.283	1.18012	0.238934	0.0132639	0.0380409
863	AT1G09155	0	0	0	2	0	0	AT1G09155	1.32254	1.01126	1.63382	1.61563	0.692099	0.849864	1
864	AT1G09157	4	1	5	0	4	2	AT1G09157	3.73395	4.47885	2.98905	0.66737	-0.58344	0.676461	0.965066
865	AT1G09160	555	652	498	639	596	589	AT1G09160	587.079	572.165	601.994	1.05213	0.0733172	0.456631	0.732365
866	AT1G09170	4	6	8	0	1	1	AT1G09170	4.37776	7.0998	1.65572	0.233207	-2.10032	0.0534135	0.128636
867	AT1G09176	2	0	0	0	0	3	AT1G09176	1.84507	1.70108	1.98905	1.16929	0.225628	1	1
868	AT1G09180	13	5	4	4	10	0	AT1G09180	7.04169	8.47145	5.61193	0.662452	-0.594113	0.558534	0.843388
869	AT1G09190	104	148	128	143	132	130	AT1G09190	131.409	128.394	134.424	1.04696	0.0662122	0.72972	1
870	AT1G09195	270	313	206	246	223	205	AT1G09195	243.82	264.677	222.963	0.842396	-0.247429	0.079059	0.180095
871	AT1G09200	2209	2568	2099	1507	1513	1495	AT1G09200	1898.46	2307.42	1489.49	0.645522	-0.631462	2.99747e-22	5.45479e-21
872	AT1G09210	3011	3601	2915	4579	4300	4116	AT1G09210	3738.89	3195.26	4282.53	1.34028	0.42253	2.5546e-13	2.73516e-12
873	AT1G09220	47	69	52	42	89	84	AT1G09220	64.6771	57.1584	72.1959	1.26309	0.336953	0.380627	0.642032
874	AT1G09230	391	397	340	446	418	404	AT1G09230	399.464	380.154	418.773	1.10159	0.139584	0.192024	0.375438
875	AT1G09240	1660	1913	1710	696	637	604	AT1G09240	1207.59	1776.14	639.036	0.359789	-1.47478	5.30848e-85	5.21381e-83
876	AT1G09245	0	0	0	0	0	2	AT1G09245	1.33349	1.01126	1.65572	1.63728	0.711304	0.84937	1
877	AT1G09250	825	818	634	934	846	816	AT1G09250	810.67	765.243	856.097	1.11873	0.161857	0.115806	0.248099
878	AT1G09260	0	0	0	0	0	1	AT1G09260	1.16682	1.01126	1.32239	1.30766	0.386989	1	1
879	AT1G09270	2161	2478	2067	2304	2289	2089	AT1G09270	2227.3	2251.51	2203.1	0.9785	-0.0313567	0.603079	0.887797
880	AT1G09280	649	731	545	1138	1116	1093	AT1G09280	875.026	645.855	1104.2	1.70967	0.773715	2.93932e-21	5.13928e-20
881	AT1G09290	320	371	321	388	368	404	AT1G09290	362.118	340.828	383.408	1.12493	0.169836	0.132479	0.277014
882	AT1G09300	319	355	279	310	315	338	AT1G09300	319.588	320.581	318.595	0.993805	-0.00896565	0.92398	1
883	AT1G09310	911	1076	834	401	355	422	AT1G09310	667.738	946.21	389.266	0.411395	-1.2814	1.01653e-45	4.29437e-44
884	AT1G09320	132	208	174	242	220	233	AT1G09320	201.531	173.057	230.006	1.32908	0.410431	0.00489531	0.0156574
885	AT1G09330	1096	1255	919	1112	1013	953	AT1G09330	1055.35	1095.89	1014.82	0.926022	-0.110882	0.220673	0.420363
886	AT1G09340	545	614	584	674	564	640	AT1G09340	603.537	587.464	619.61	1.05472	0.0768609	0.387144	0.650164
887	AT1G09350	4	0	0	0	0	0	AT1G09350	1.68998	2.39091	0.989053	0.413673	-1.27344	0.556099	0.842478
888	AT1G09360	0	0	0	0	0	0	AT1G09360	1.00016	1.01126	0.989053	0.97804	-0.0320349	1	1
889	AT1G09370	5	7	0	2	2	1	AT1G09370	3.77314	4.91246	2.63382	0.536151	-0.899287	0.4299	0.702328
890	AT1G09380	11215	12853	10894	8548	7906	7700	AT1G09380	9848.14	11737.5	7958.74	0.678059	-0.560518	3.01676e-27	6.8854e-26
891	AT1G09390	290	349	258	673	641	604	AT1G09390	467.102	301.25	632.955	2.1011	1.07114	2.98212e-25	6.2361e-24
892	AT1G09400	28	26	30	32	44	32	AT1G09400	33.0271	29.4154	36.6387	1.24556	0.316796	0.359302	0.615355
893	AT1G09410	30	41	33	56	41	42	AT1G09410	41.2725	35.8357	46.7093	1.30343	0.382313	0.222267	0.422838
894	AT1G09415	230	278	268	243	236	253	AT1G09415	252.18	262.032	242.329	0.924807	-0.112776	0.397077	0.661955
895	AT1G09420	461	583	506	723	712	734	AT1G09420	618.602	521.131	716.074	1.37408	0.458463	5.33939e-07	3.24032e-06
896	AT1G09430	2363	2964	2490	2867	2680	2516	AT1G09430	2639.95	2622.64	2657.27	1.01321	0.0189274	0.798067	1
897	AT1G09440	17	13	15	14	2	12	AT1G09440	13.2086	16.2481	10.1691	0.625866	-0.676075	0.245624	0.456669
898	AT1G09450	18	22	12	41	19	32	AT1G09450	24.7661	18.3253	31.2069	1.70294	0.768024	0.0587271	0.139711
899	AT1G09460	58	79	61	81	79	72	AT1G09460	72.3481	67.2605	77.4356	1.15128	0.203239	0.405519	0.671889
900	AT1G09470	21	33	27	17	19	11	AT1G09470	22.2906	28.1115	16.4696	0.585867	-0.771354	0.0678464	0.158196
901	AT1G09480	19	23	23	21	26	37	AT1G09480	25.8249	22.8906	28.7592	1.25637	0.329266	0.41693	0.68658
902	AT1G09483	0	0	0	0	0	0	AT1G09483	1.00016	1.01126	0.989053	0.97804	-0.0320349	1	1
903	AT1G09490	338	430	353	378	328	335	AT1G09490	360.303	376.755	343.851	0.912663	-0.131845	0.232997	0.438498
904	AT1G09500	270	329	198	202	170	164	AT1G09500	222.127	266.809	177.444	0.665062	-0.588439	0.0024112	0.00824628
905	AT1G09510	2	5	2	8	6	1	AT1G09510	4.93405	3.96663	5.90147	1.48778	0.573162	0.601449	0.886057
906	AT1G09520	654	727	564	720	713	688	AT1G09520	676.598	653.089	700.107	1.07199	0.100296	0.27161	0.494474
907	AT1G09530	3533	3937	3302	3075	2696	2789	AT1G09530	3218.99	3617.32	2820.66	0.779765	-0.358889	9.63677e-10	7.65259e-09
908	AT1G09540	0	2	2	0	0	0	AT1G09540	1.6665	2.34396	0.989053	0.421958	-1.24483	0.5579	0.843232
909	AT1G09550	0	0	0	0	0	0	AT1G09550	1.00016	1.01126	0.989053	0.97804	-0.0320349	1	1
910	AT1G09560	11098	13260	10956	7545	7243	6843	AT1G09560	9487.25	11845.8	7128.72	0.601794	-0.732658	4.73249e-45	1.95672e-43
911	AT1G09570	26398	31103	25331	27831	25670	25000	AT1G09570	26821.7	27780.1	25863.3	0.931003	-0.103143	0.0333158	0.0853232
912	AT1G09575	121	171	97	162	170	108	AT1G09575	138.137	130.392	145.882	1.1188	0.161953	0.577613	0.864434
913	AT1G09580	238	297	281	338	379	337	AT1G09580	311.971	275.319	348.622	1.26625	0.340558	0.0042541	0.01377
914	AT1G09590	5242	6423	5556	8353	7984	7498	AT1G09590	6817.7	5780.86	7854.55	1.35871	0.442243	2.64978e-16	3.47924e-15
915	AT1G09600	30	50	30	56	60	55	AT1G09600	47.472	37.568	57.376	1.52726	0.610941	0.0390708	0.0980843
916	AT1G09610	4	14	15	16	15	24	AT1G09610	15.6112	12.0752	19.1472	1.58567	0.66509	0.201482	0.389529
917	AT1G09620	2233	2601	2273	3906	3547	3374	AT1G09620	2977.51	2387.8	3567.23	1.49394	0.579121	4.1615e-22	7.5378e-21
918	AT1G09625	0	0	0	0	0	0	AT1G09625	1.00016	1.01126	0.989053	0.97804	-0.0320349	1	1
919	AT1G09630	1135	1455	1260	1270	1190	1108	AT1G09630	1234.57	1292.72	1176.42	0.910034	-0.136008	0.0880539	0.197103
920	AT1G09640	5339	6475	5251	7304	6860	7152	AT1G09640	6374.23	5722.09	7026.36	1.22794	0.296235	4.78774e-08	3.22734e-07
921	AT1G09645	970	1142	841	895	812	793	AT1G09645	907.047	989.57	824.524	0.833215	-0.26324	0.00182917	0.00642289
922	AT1G09650	23	42	24	41	70	36	AT1G09650	40.0369	30.5337	49.5402	1.62248	0.698199	0.122544	0.259773
923	AT1G09660	545	628	583	1006	883	854	AT1G09660	747.886	591.462	904.309	1.52894	0.612531	5.85753e-13	6.08477e-12
924	AT1G09665	0	2	0	0	0	0	AT1G09665	1.31111	1.63316	0.989053	0.605607	-0.723546	0.824525	1
925	AT1G09680	44	67	68	84	70	97	AT1G09680	72.4621	61.1881	83.7361	1.3685	0.452599	0.0527007	0.127197
926	AT1G09690	8568	10445	8418	14039	14288	13277	AT1G09690	11455.6	9195.83	13715.3	1.49147	0.576734	1.08173e-28	2.61363e-27
927	AT1G09700	459	578	380	573	574	527	AT1G09700	513.411	474.106	552.716	1.16581	0.221329	0.0669519	0.156419
928	AT1G09710	113	110	89	181	177	227	AT1G09710	149.914	105.821	194.008	1.83335	0.874484	1.00119e-06	5.88809e-06
929	AT1G09720	0	2	0	0	0	0	AT1G09720	1.31111	1.63316	0.989053	0.605607	-0.723546	0.824525	1
930	AT1G09730	1218	1496	1264	1511	1341	1376	AT1G09730	1364.65	1335.52	1393.78	1.04363	0.061604	0.396204	0.660891
931	AT1G09740	1254	1611	1383	617	470	551	AT1G09740	983.111	1425.99	540.234	0.37885	-1.4003	4.56724e-36	1.42823e-34
932	AT1G09750	196	256	215	346	413	376	AT1G09750	300.081	224.628	375.535	1.67181	0.741409	1.61619e-09	1.25449e-08
933	AT1G09760	779	970	769	950	927	915	AT1G09760	882.938	844.62	921.256	1.09073	0.125299	0.132557	0.277155
934	AT1G09770	2552	3078	2257	3681	3519	3241	AT1G09770	3040.74	2640.46	3441.02	1.30319	0.382047	2.26535e-06	1.27521e-05
935	AT1G09780	7288	8616	7266	6438	5817	5810	AT1G09780	6864.19	7776.2	5952.18	0.765435	-0.385647	4.20465e-13	4.41986e-12
936	AT1G09790	0	0	0	0	0	0	AT1G09790	1.00016	1.01126	0.989053	0.97804	-0.0320349	1	1
937	AT1G09794	287	332	251	236	240	194	AT1G09794	257.09	292.441	221.739	0.758234	-0.399286	0.00182199	0.00639978
938	AT1G09795	994	1144	905	1211	1274	1204	AT1G09795	1119.31	1021.22	1217.4	1.19211	0.253514	0.000833195	0.00313136
939	AT1G09800	101	138	92	121	133	108	AT1G09800	115.893	111.455	120.331	1.07964	0.110547	0.600508	0.885065
940	AT1G09810	289	297	254	427	407	357	AT1G09810	338.314	283.314	393.314	1.38826	0.473281	3.789e-05	0.00017912
941	AT1G09812	3	0	3	2	1	2	AT1G09812	2.87301	3.11219	2.63382	0.846292	-0.240772	0.980724	1
942	AT1G09815	529	638	499	616	648	545	AT1G09815	578.222	559.199	597.245	1.06804	0.0949613	0.331468	0.57885
943	AT1G09820	145	169	147	211	210	191	AT1G09820	179.248	155.818	202.679	1.30075	0.37934	0.0126809	0.0365541
944	AT1G09830	632	721	590	752	649	656	AT1G09830	665.649	652.875	678.423	1.03913	0.055378	0.542325	0.829749
945	AT1G09840	635	745	655	813	708	698	AT1G09840	708.115	684.474	731.755	1.06908	0.0963663	0.264293	0.483873
946	AT1G09850	368	484	377	176	209	170	AT1G09850	298.243	412.424	184.062	0.446294	-1.16393	2.86058e-21	5.00482e-20
947	AT1G09860	9	11	17	5	3	3	AT1G09860	9.08934	13.5777	4.60098	0.338863	-1.56122	0.0273378	0.0716525
948	AT1G09870	1090	1314	988	1387	1115	1218	AT1G09870	1181.25	1136.69	1225.8	1.0784	0.108895	0.29693	0.530382
949	AT1G09880	5	8	9	2	2	3	AT1G09880	5.86125	8.42201	3.30049	0.391889	-1.35148	0.129298	0.271656
950	AT1G09890	1	1	5	0	4	2	AT1G09890	3.21658	3.44412	2.98905	0.867872	-0.204446	0.97962	1
951	AT1G09900	303	394	320	544	470	531	AT1G09900	425.897	341.761	510.034	1.49237	0.577604	4.59601e-08	3.10467e-07
952	AT1G09910	541	651	531	747	693	735	AT1G09910	648.282	578.753	717.811	1.24027	0.310656	0.000570954	0.00222286
953	AT1G09920	1385	1723	1275	1201	1133	1050	AT1G09920	1291.73	1467.61	1115.84	0.76031	-0.39534	9.53739e-06	4.93955e-05
954	AT1G09930	9	8	4	2	1	3	AT1G09930	5.49591	8.02466	2.96716	0.369755	-1.43536	0.118253	0.25219
955	AT1G09932	257	389	283	286	237	247	AT1G09932	282.858	311.191	254.525	0.817906	-0.289993	0.0590287	0.140342
956	AT1G09935	0	0	0	0	0	0	AT1G09935	1.00016	1.01126	0.989053	0.97804	-0.0320349	1	1
957	AT1G09940	6903	8324	6878	6851	6420	6194	AT1G09940	6914.52	7414.71	6414.32	0.86508	-0.209094	7.33355e-05	0.000332417
958	AT1G09950	343	356	351	958	913	849	AT1G09950	625.964	354.759	897.168	2.52895	1.33854	3.34039e-47	1.47053e-45
959	AT1G09960	6929	8575	6749	8693	7964	7711	AT1G09960	7742.19	7455.88	8028.49	1.0768	0.106749	0.1036	0.226479
960	AT1G09970	20735	23908	19595	16640	15339	15456	AT1G09970	18590.7	21551	15630.5	0.72528	-0.46339	1.69101e-20	2.85218e-19
961	AT1G09980	1012	1163	1024	1154	1156	1134	AT1G09980	1105.99	1075.62	1136.36	1.05646	0.0792399	0.295565	0.528525
962	AT1G09995	91	117	96	84	109	99	AT1G09995	100.15	102.898	97.4028	0.946599	-0.0791742	0.682742	0.968571
963	AT1G10000	66	80	68	105	108	72	AT1G10000	83.829	72.8185	94.8396	1.30241	0.381184	0.0807184	0.183201
964	AT1G10010	0	0	0	0	0	0	AT1G10010	1.00016	1.01126	0.989053	0.97804	-0.0320349	1	1
965	AT1G10020	205	254	201	96	78	72	AT1G10020	152.036	222.134	81.9381	0.368867	-1.43883	1.38185e-17	1.96625e-16
966	AT1G10030	204	304	224	293	289	266	AT1G10030	262.98	245.511	280.448	1.1423	0.191945	0.152586	0.310851
967	AT1G10040	139	173	137	211	181	183	AT1G10040	170.892	151.438	190.346	1.25692	0.329897	0.035274	0.0897638
968	AT1G10050	437	521	413	408	390	360	AT1G10050	421.522	460.522	382.522	0.830628	-0.267726	0.0100479	0.0297006
969	AT1G10060	14	13	8	40	30	22	AT1G10060	21.9717	12.7256	31.2178	2.45316	1.29464	0.00281205	0.00947427
970	AT1G10070	171	209	147	198	192	169	AT1G10070	181.189	177.223	185.155	1.04475	0.0631642	0.717147	0.999678
971	AT1G10090	999	1219	1085	1077	990	1002	AT1G10090	1061.22	1110.23	1012.2	0.911699	-0.13337	0.0788336	0.179657
972	AT1G10095	98	159	130	159	138	111	AT1G10095	132.852	130.455	135.248	1.03674	0.0520546	0.829791	1
973	AT1G10100	0	0	0	0	0	0	AT1G10100	1.00016	1.01126	0.989053	0.97804	-0.0320349	1	1
974	AT1G10110	49	46	41	34	39	16	AT1G10110	38.5352	46.787	30.2835	0.647264	-0.627574	0.0519582	0.125651
975	AT1G10120	502	627	457	431	380	434	AT1G10120	471.405	531.54	411.271	0.773735	-0.370089	0.000194253	0.000823313
976	AT1G10130	978	1342	1022	1496	1417	1291	AT1G10130	1252.4	1118.85	1385.95	1.23873	0.308858	0.00210657	0.00730732
977	AT1G10140	103	108	103	29	25	50	AT1G10140	71.032	106.726	35.3382	0.331112	-1.59461	6.68005e-11	5.91016e-10
978	AT1G10150	409	509	429	388	337	391	AT1G10150	410.78	452.82	368.741	0.814323	-0.296327	0.00497238	0.0158685
979	AT1G10155	7	3	4	0	3	1	AT1G10155	4.05124	5.78009	2.32239	0.401791	-1.31548	0.241185	0.450542
980	AT1G10170	2615	2994	2610	3099	2991	3022	AT1G10170	2882.96	2761.53	3004.4	1.08795	0.121608	0.0429839	0.106417
981	AT1G10180	609	701	577	847	769	796	AT1G10180	714.91	634.103	795.717	1.25487	0.327537	0.000160258	0.000688346
982	AT1G10190	0	0	0	0	0	0	AT1G10190	1.00016	1.01126	0.989053	0.97804	-0.0320349	1	1
983	AT1G10200	1108	1222	1033	863	851	790	AT1G10200	978.244	1130.28	826.208	0.730976	-0.452104	6.35462e-09	4.6238e-08
984	AT1G10210	117	149	112	125	166	132	AT1G10210	134.061	127.502	140.621	1.10289	0.141288	0.449904	0.725511
985	AT1G10220	0	6	4	2	4	4	AT1G10220	4.29952	4.29855	4.30049	1.00045	0.000650293	1	1
986	AT1G10230	299	360	348	409	391	325	AT1G10230	355.636	339.76	371.512	1.09345	0.128889	0.267644	0.488759
987	AT1G10240	281	283	212	340	315	315	AT1G10240	290.937	261.275	320.6	1.22706	0.295208	0.0168466	0.0469456
988	AT1G10250	1	4	2	4	1	5	AT1G10250	3.79468	3.31077	4.2786	1.29233	0.369972	0.823229	1
989	AT1G10270	367	432	377	390	355	415	AT1G10270	389.648	395.909	383.386	0.968369	-0.0463718	0.668952	0.956984
990	AT1G10280	176	252	205	298	266	228	AT1G10280	237.329	212.932	261.727	1.22916	0.29767	0.0413899	0.103052
991	AT1G10290	1805	2205	1784	1784	1728	1589	AT1G10290	1812.52	1943.25	1681.79	0.865452	-0.208474	0.00131479	0.00474533
992	AT1G10300	7	28	17	6	5	13	AT1G10300	13.5487	18.174	8.92337	0.490996	-1.02622	0.122122	0.259041
993	AT1G10310	443	578	484	580	507	477	AT1G10310	510.761	505.549	515.973	1.02062	0.0294443	0.7831	1
994	AT1G10320	528	801	547	714	682	650	AT1G10320	650.885	626.598	675.173	1.07752	0.107715	0.489652	0.769939
995	AT1G10330	57	92	45	80	69	52	AT1G10330	66.1924	65.2715	67.1133	1.02822	0.0401441	0.958347	1
996	AT1G10340	298	349	288	235	215	241	AT1G10340	271.71	314.671	228.75	0.726948	-0.460075	0.000251248	0.00104326
997	AT1G10350	398	464	450	487	568	471	AT1G10350	473.41	442.496	504.324	1.13973	0.188687	0.10422	0.227652
998	AT1G10360	17	32	32	20	18	11	AT1G10360	22.6507	28.1979	17.1034	0.60655	-0.721302	0.0880361	0.197086
999	AT1G10370	2239	2629	2206	1667	1344	1347	AT1G10370	1905.09	2374.76	1435.41	0.604442	-0.726325	2.22621e-22	4.08128e-21
1000	AT1G10380	9	11	3	0	2	6	AT1G10380	6.12891	8.6021	3.65572	0.42498	-1.23453	0.141874	0.293388
1001	AT1G10385	0	4	0	0	0	0	AT1G10385	1.62206	2.25506	0.989053	0.438593	-1.18905	0.561396	0.845556
1002	AT1G10390	2850	3471	2691	3644	3164	3033	AT1G10390	3130.56	3019.69	3241.43	1.07343	0.102228	0.245063	0.455752
1003	AT1G10400	29	29	18	23	11	12	AT1G10400	21.2495	26.4284	16.0706	0.60808	-0.717666	0.100181	0.220066
1004	AT1G10410	2514	2874	2268	1720	1562	1592	AT1G10410	2087.33	2567.83	1606.83	0.625752	-0.676337	3.07489e-26	6.69244e-25
1005	AT1G10417	11	6	10	13	14	12	AT1G10417	12.0359	10.225	13.8467	1.35421	0.437449	0.455419	0.730895
1006	AT1G10430	683	737	615	730	806	682	AT1G10430	708.328	684.326	732.331	1.07015	0.0978116	0.267464	0.488583
1007	AT1G10450	694	816	631	872	854	841	AT1G10450	782.74	718.371	847.11	1.17921	0.237819	0.00522348	0.0165747
1008	AT1G10455	0	0	0	2	2	0	AT1G10455	1.65588	1.01126	2.30049	2.27488	1.18579	0.583623	0.869316
1009	AT1G10460	8	22	14	9	16	30	AT1G10460	17.4054	15.587	19.2239	1.23332	0.302552	0.679883	0.966898
1010	AT1G10470	1555	1790	1460	1420	1286	1179	AT1G10470	1446.64	1612.83	1280.44	0.793911	-0.332951	1.59065e-06	9.13174e-06
1011	AT1G10480	1	0	0	0	1	0	AT1G10480	1.33928	1.35617	1.32239	0.975087	-0.0363964	1	1
1012	AT1G10490	1273	1556	1285	1359	1133	1215	AT1G10490	1301.19	1380.61	1221.78	0.884956	-0.176322	0.0144044	0.040894
1013	AT1G10500	1992	2391	2054	1653	1399	1520	AT1G10500	1834.22	2161.54	1506.89	0.697137	-0.520486	2.37424e-15	2.91356e-14
1014	AT1G10510	630	834	588	825	736	678	AT1G10510	712.451	686.612	738.291	1.07527	0.104694	0.409299	0.676801
1015	AT1G10520	39	68	45	66	53	60	AT1G10520	55.7668	51.6003	59.9332	1.16149	0.215975	0.453108	0.72869
1016	AT1G10522	804	809	677	982	938	936	AT1G10522	856.361	770.483	942.239	1.22292	0.290329	0.000348477	0.00141418
1017	AT1G10530	82	98	53	129	123	107	AT1G10530	98.9233	78.6032	119.243	1.51703	0.601251	0.00333751	0.0110665
1018	AT1G10540	444	587	457	639	623	634	AT1G10540	562.545	499.097	625.994	1.25425	0.326829	0.00064078	0.00247277
1019	AT1G10550	397	516	391	335	290	319	AT1G10550	374.67	437.352	311.988	0.713357	-0.487303	8.09725e-06	4.23805e-05
1020	AT1G10560	13	9	18	8	11	2	AT1G10560	11.2962	14.6908	7.90147	0.53785	-0.894723	0.157721	0.319291
1021	AT1G10570	597	679	498	679	569	542	AT1G10570	592.635	595.047	590.222	0.991892	-0.0117445	0.902897	1
1022	AT1G10580	1274	1481	1034	1562	1490	1313	AT1G10580	1353.66	1268.43	1438.89	1.13439	0.181915	0.117143	0.2503
1023	AT1G10585	0	0	0	0	0	0	AT1G10585	1.00016	1.01126	0.989053	0.97804	-0.0320349	1	1
1024	AT1G10586	0	0	1	0	0	0	AT1G10586	1.17786	1.36666	0.989053	0.723701	-0.466534	0.987691	1
1025	AT1G10588	0	0	0	0	0	0	AT1G10588	1.00016	1.01126	0.989053	0.97804	-0.0320349	1	1
1026	AT1G10590	2115	2575	2138	2667	2581	2486	AT1G10590	2420.41	2291.04	2549.79	1.11294	0.154379	0.0139451	0.0397433
1027	AT1G10600	469	448	420	700	581	552	AT1G10600	527.837	451.348	604.326	1.33894	0.421087	0.00026252	0.00108642
1028	AT1G10610	106	107	117	258	239	217	AT1G10610	174.295	112.425	236.165	2.10064	1.07083	5.0993e-12	4.94641e-11
1029	AT1G10620	0	0	0	0	0	0	AT1G10620	1.00016	1.01126	0.989053	0.97804	-0.0320349	1	1
1030	AT1G10630	1400	1683	1338	1624	1584	1558	AT1G10630	1527.31	1482.74	1571.88	1.06012	0.0842235	0.240749	0.450005
1031	AT1G10640	3	6	5	7	4	13	AT1G10640	7.30055	5.68869	8.91242	1.56669	0.647722	0.427768	0.699895
1032	AT1G10650	2664	3280	2744	2414	2260	2372	AT1G10650	2619.11	2914.98	2323.23	0.796995	-0.327357	6.12706e-08	4.08461e-07
1033	AT1G10652	2	1	0	0	0	0	AT1G10652	1.50054	2.01203	0.989053	0.491569	-1.02453	0.680673	0.967018
1034	AT1G10657	20	9	19	32	23	19	AT1G10657	21.383	17.4606	25.3054	1.44928	0.535341	0.195705	0.38099
1035	AT1G10660	1253	1436	1230	1517	1359	1411	AT1G10660	1365.12	1316.85	1413.38	1.07331	0.102061	0.150657	0.307854
1036	AT1G10670	3781	4565	3720	4155	3877	3761	AT1G10670	3966.6	4046.69	3886.5	0.960415	-0.0582701	0.285893	0.515236
1037	AT1G10680	0	0	0	1	0	0	AT1G10680	1.16135	1.01126	1.31144	1.29684	0.374996	1	1
1038	AT1G10690	47	34	70	52	52	35	AT1G10690	49.7127	52.6723	46.7531	0.887622	-0.171982	0.734687	1
1039	AT1G10700	867	1107	943	875	788	795	AT1G10700	895.078	979.412	810.743	0.827786	-0.27267	0.00060972	0.0023623
1040	AT1G10710	20	32	12	4	7	4	AT1G10710	14.035	22.1247	5.94526	0.268717	-1.89584	0.000657961	0.00253118
1041	AT1G10717	0	0	0	0	0	0	AT1G10717	1.00016	1.01126	0.989053	0.97804	-0.0320349	1	1
1042	AT1G10720	1371	1636	1203	997	994	939	AT1G10720	1188.44	1410.14	966.741	0.685562	-0.54464	4.27962e-10	3.51969e-09
1043	AT1G10730	321	377	261	355	296	302	AT1G10730	318.242	321.715	314.769	0.978411	-0.0314878	0.769193	1
1044	AT1G10740	1345	1759	1364	1495	1404	1222	AT1G10740	1427.47	1496.64	1358.29	0.907558	-0.139938	0.161384	0.325159
1045	AT1G10745	0	0	0	0	0	0	AT1G10745	1.00016	1.01126	0.989053	0.97804	-0.0320349	1	1
1046	AT1G10747	0	0	0	0	0	0	AT1G10747	1.00016	1.01126	0.989053	0.97804	-0.0320349	1	1
1047	AT1G10750	28	24	13	22	30	41	AT1G10750	27.25	22.7518	31.7482	1.39542	0.480697	0.238928	0.447378
1048	AT1G10760	3629	4424	3304	5976	5278	4923	AT1G10760	4565.24	3802.57	5327.9	1.40113	0.486591	5.88947e-07	3.55511e-06
1049	AT1G10770	47	44	21	12	16	5	AT1G10770	25.1125	38.3673	11.8577	0.309057	-1.69405	0.000954325	0.00353724
1050	AT1G10780	59	60	52	65	63	58	AT1G10780	60.3881	58.4988	62.2775	1.06459	0.0903043	0.73847	1
1051	AT1G10790	2	2	2	0	0	2	AT1G10790	2.34475	3.03378	1.65572	0.545761	-0.873658	0.613488	0.899937
1052	AT1G10800	0	0	0	1	0	0	AT1G10800	1.16135	1.01126	1.31144	1.29684	0.374996	1	1
1053	AT1G10810	61	93	76	69	58	72	AT1G10810	72.2733	77.9795	66.567	0.853648	-0.228287	0.323293	0.567856
1054	AT1G10820	890	1085	942	1098	997	960	AT1G10820	993.725	980.149	1007.3	1.0277	0.039424	0.618657	0.904693
1055	AT1G10830	593	783	665	589	525	426	AT1G10830	596.616	685.358	507.874	0.741036	-0.432385	0.00134108	0.00483124
1056	AT1G10840	2011	2333	1943	2854	2673	2445	AT1G10840	2368.85	2110.61	2627.08	1.2447	0.315797	4.03899e-07	2.48552e-06
1057	AT1G10850	255	338	245	345	401	390	AT1G10850	328.508	281.137	375.879	1.33699	0.418992	0.00068103	0.00260959
1058	AT1G10865	489	603	497	509	443	451	AT1G10865	498.446	533.809	463.083	0.867508	-0.205051	0.0357273	0.0907729
1059	AT1G10870	743	890	802	973	919	861	AT1G10870	863.53	819.056	908.004	1.1086	0.148737	0.065779	0.153943
1060	AT1G10880	2	2	0	0	2	1	AT1G10880	2.15602	2.32298	1.98905	0.85625	-0.223896	0.983107	1
1061	AT1G10890	1853	2239	1741	1763	1631	1445	AT1G10890	1774.89	1955.1	1594.69	0.815657	-0.293966	0.000457672	0.00181428
1062	AT1G10900	1252	1367	1130	1251	1143	1178	AT1G10900	1218.73	1259.51	1177.96	0.935253	-0.0965707	0.182432	0.360108
1063	AT1G10910	407	464	372	619	475	513	AT1G10910	473.879	417.879	529.879	1.26802	0.342578	0.0033489	0.0111029
1064	AT1G10920	18	33	17	48	45	36	AT1G10920	33.4932	23.5228	43.4636	1.84772	0.885748	0.0119002	0.0345267
1065	AT1G10930	265	316	242	316	283	262	AT1G10930	280.605	276.679	284.53	1.02837	0.0403638	0.774087	1
1066	AT1G10940	2296	2762	2208	2066	2051	2185	AT1G10940	2257.76	2436.49	2079.04	0.853292	-0.228889	0.000202295	0.000854733
1067	AT1G10950	2908	3613	2655	4502	4171	3923	AT1G10950	3610.71	3071.06	4150.37	1.35145	0.434504	1.16032e-07	7.53403e-07
1068	AT1G10960	7345	8889	6982	9558	9145	8898	AT1G10960	8438.25	7779.81	9096.69	1.16927	0.225606	2.25615e-05	0.000110516
1069	AT1G10970	1042	1180	916	1696	1565	1534	AT1G10970	1316.82	1052.87	1580.76	1.50137	0.58628	3.79048e-16	4.93415e-15
1070	AT1G10980	0	0	0	0	0	0	AT1G10980	1.00016	1.01126	0.989053	0.97804	-0.0320349	1	1
1071	AT1G10990	54	85	73	57	46	74	AT1G10990	65.6882	72.0113	59.365	0.824385	-0.27861	0.261394	0.479793
1072	AT1G11000	283	322	219	622	585	557	AT1G11000	429.38	276.579	582.18	2.10493	1.07377	8.41383e-24	1.64091e-22
1073	AT1G11020	615	746	564	659	679	604	AT1G11020	643.327	645.545	641.108	0.993126	-0.00995065	0.872777	1
1074	AT1G11040	0	2	2	0	0	1	AT1G11040	1.83317	2.34396	1.32239	0.564168	-0.825803	0.705285	0.989832
1075	AT1G11050	924	1034	789	1325	1281	1318	AT1G11050	1108.06	921.641	1294.48	1.40454	0.4901	9.63988e-11	8.3924e-10
1076	AT1G11060	485	525	449	541	527	514	AT1G11060	506.758	491.116	522.4	1.0637	0.0890906	0.366898	0.62405
1077	AT1G11070	1	0	1	2	1	4	AT1G11070	2.50603	1.71157	3.30049	1.92834	0.94736	0.546115	0.833385
1078	AT1G11080	0	0	0	0	0	0	AT1G11080	1.00016	1.01126	0.989053	0.97804	-0.0320349	1	1
1079	AT1G11090	515	597	518	561	475	536	AT1G11090	533.611	548.374	518.848	0.946156	-0.0798501	0.408631	0.675901
1080	AT1G11100	168	240	147	154	139	144	AT1G11100	165.399	185.828	144.97	0.780129	-0.358215	0.0385004	0.0969135
1081	AT1G11110	0	2	0	0	0	0	AT1G11110	1.31111	1.63316	0.989053	0.605607	-0.723546	0.824525	1
1082	AT1G11112	11	6	14	17	18	6	AT1G11112	13.0581	11.6466	14.4696	1.24239	0.313121	0.566406	0.851503
1083	AT1G11120	19	42	44	86	68	48	AT1G11120	51.8215	36.262	67.3809	1.85817	0.893881	0.0160217	0.0449044
1084	AT1G11125	59	87	77	111	80	109	AT1G11125	87.7766	75.7794	99.7739	1.31664	0.396857	0.063501	0.149344
1085	AT1G11130	58	81	71	108	108	113	AT1G11130	90.4549	71.4364	109.473	1.53246	0.61585	0.00351132	0.0115652
1086	AT1G11145	2	0	0	0	0	0	AT1G11145	1.34507	1.70108	0.989053	0.581425	-0.782334	0.823113	1
1087	AT1G11160	11	8	18	7	13	6	AT1G11160	11.6346	13.6901	9.57909	0.699711	-0.515169	0.429797	0.70227
1088	AT1G11170	279	308	267	294	257	250	AT1G11170	276.338	287.906	264.771	0.919644	-0.120853	0.342916	0.594303
1089	AT1G11180	260	382	284	367	305	359	AT1G11180	325.521	310.404	340.638	1.0974	0.134091	0.358476	0.614344
1090	AT1G11190	8	13	11	3	6	5	AT1G11190	8.67258	11.7223	5.62288	0.479674	-1.05987	0.131606	0.275489
1091	AT1G11200	825	1011	833	895	793	783	AT1G11200	855.419	895.981	814.858	0.909459	-0.136919	0.0880068	0.197047
1092	AT1G11210	346	441	360	452	380	387	AT1G11210	393.899	385.423	402.374	1.04398	0.0620949	0.584923	0.870095
1093	AT1G11220	16	2	7	13	9	6	AT1G11220	9.9098	9.63954	10.1801	1.05607	0.0787116	0.919385	1
1094	AT1G11230	2	2	2	0	0	0	AT1G11230	2.01142	3.03378	0.989053	0.326013	-1.617	0.365342	0.62219
1095	AT1G11240	491	648	463	746	739	706	AT1G11240	629.782	536.408	723.156	1.34815	0.430976	2.81069e-06	1.56229e-05
1096	AT1G11250	0	0	4	0	0	0	AT1G11250	1.71095	2.43286	0.989053	0.40654	-1.29853	0.554515	0.842447
1097	AT1G11260	2070	2506	1901	2636	2659	2440	AT1G11260	2360.15	2169.83	2550.46	1.17542	0.233178	0.000753513	0.00286074
1098	AT1G11270	108	142	66	195	160	137	AT1G11270	134.364	105.873	162.854	1.53821	0.621249	0.0180079	0.0498445
1099	AT1G11280	388	436	316	361	376	326	AT1G11280	367.044	382.717	351.37	0.918094	-0.123285	0.250708	0.464029
1100	AT1G11290	84	103	86	135	99	100	AT1G11290	101.71	92.5759	110.844	1.19734	0.259828	0.191112	0.373922
1101	AT1G11300	2720	3156	2543	3551	3241	2979	AT1G11300	3021.71	2824.31	3219.11	1.13979	0.188767	0.00829371	0.0249932
1102	AT1G11310	7232	8950	7024	8152	7119	7277	AT1G11310	7601.24	7774.73	7427.75	0.95537	-0.0658685	0.325734	0.571331
1103	AT1G11320	106	103	95	105	94	146	AT1G11320	109.101	103.363	114.84	1.11104	0.151906	0.501705	0.783546
1104	AT1G11330	225	230	149	130	163	130	AT1G11330	171.828	203.089	140.566	0.692139	-0.530867	0.0116591	0.0338885
1105	AT1G11340	4	3	3	3	3	5	AT1G11340	4.50641	4.38995	4.62288	1.05306	0.0745859	1	1
1106	AT1G11350	121	128	119	146	123	152	AT1G11350	132.282	124.84	139.724	1.11923	0.162505	0.350813	0.60395
1107	AT1G11360	912	1039	878	1113	1017	993	AT1G11360	990.246	950.687	1029.8	1.08322	0.115328	0.139423	0.289331
1108	AT1G11362	2	0	0	0	0	2	AT1G11362	1.6784	1.70108	1.65572	0.973332	-0.0389955	1	1
1109	AT1G11370	0	6	10	4	6	0	AT1G11370	5.35477	6.43095	4.2786	0.665313	-0.587894	0.622979	0.909377
1110	AT1G11380	252	326	247	321	336	311	AT1G11380	298.612	277.082	320.142	1.1554	0.208397	0.096079	0.212697
1111	AT1G11390	675	810	608	718	740	691	AT1G11390	705.62	701.778	709.462	1.01095	0.0157105	0.910935	1
1112	AT1G11400	938	1186	963	1148	1080	1029	AT1G11400	1054.83	1035.57	1074.09	1.03719	0.0526822	0.517368	0.80091
1113	AT1G11410	493	617	552	1264	1239	1174	AT1G11410	885.953	559.089	1212.82	2.16928	1.11721	2.2268e-42	8.48492e-41
1114	AT1G11420	52	57	39	75	50	82	AT1G11420	59.8497	50.5313	69.168	1.36881	0.452926	0.0814482	0.184641
1115	AT1G11430	1820	2262	1746	2573	2267	2398	AT1G11430	2169.07	1952.64	2385.49	1.22167	0.288855	2.94344e-05	0.000141918
1116	AT1G11440	320	444	387	537	502	487	AT1G11440	445.38	386.984	503.777	1.3018	0.380511	0.000238441	0.000993936
1117	AT1G11450	0	9	3	0	2	2	AT1G11450	3.59919	4.876	2.32239	0.476289	-1.07009	0.347614	0.599885
1118	AT1G11460	4	7	0	1	4	1	AT1G11460	3.77283	4.56755	2.97811	0.652013	-0.617026	0.59444	0.878789
1119	AT1G11470	0	0	0	1	0	0	AT1G11470	1.16135	1.01126	1.31144	1.29684	0.374996	1	1
1120	AT1G11475	270	376	267	416	360	328	AT1G11475	335.19	305.946	364.435	1.19117	0.252385	0.0717598	0.165753
1121	AT1G11480	1834	2357	2030	2815	2715	2611	AT1G11480	2385.89	2087.95	2683.84	1.2854	0.362213	6.42441e-09	4.66958e-08
1122	AT1G11490	0	0	2	0	0	2	AT1G11490	1.68889	1.72206	1.65572	0.961477	-0.056676	1	1
1123	AT1G11500	0	0	0	1	0	0	AT1G11500	1.16135	1.01126	1.31144	1.29684	0.374996	1	1
1124	AT1G11510	0	0	1	0	1	0	AT1G11510	1.34452	1.36666	1.32239	0.967605	-0.0475103	1	1
1125	AT1G11520	0	2	0	0	1	0	AT1G11520	1.47777	1.63316	1.32239	0.809711	-0.304522	0.985956	1
1126	AT1G11530	488	657	473	484	534	525	AT1G11530	525.875	541.726	510.024	0.94148	-0.0869977	0.404091	0.670144
1127	AT1G11540	23	20	17	2	16	23	AT1G11540	17.9194	21.205	14.6338	0.690112	-0.535097	0.325555	0.571164
1128	AT1G11545	71	58	56	67	76	50	AT1G11545	64.0132	63.4374	64.5889	1.01815	0.0259529	0.918457	1
1129	AT1G11560	0	0	0	0	0	0	AT1G11560	1.00016	1.01126	0.989053	0.97804	-0.0320349	1	1
1130	AT1G11570	2	4	0	0	2	2	AT1G11570	2.63363	2.94488	2.32239	0.788618	-0.342601	0.862728	1
1131	AT1G11572	0	2	6	0	0	0	AT1G11572	2.3773	3.76555	0.989053	0.262658	-1.92874	0.231306	0.436029
1132	AT1G11580	3842	4500	3453	5831	5283	5344	AT1G11580	4687.89	3952.63	5423.15	1.37204	0.456321	2.85682e-15	3.48844e-14
1133	AT1G11590	0	4	1	3	1	1	AT1G11590	2.61667	2.61046	2.62288	1.00476	0.00684785	1	1
1134	AT1G11593	0	1	0	0	0	0	AT1G11593	1.15563	1.32221	0.989053	0.74803	-0.418832	0.987654	1
1135	AT1G11600	81	74	65	41	52	55	AT1G11600	62.4669	75.0603	49.8735	0.664446	-0.589775	0.0189409	0.0520722
1136	AT1G11608	0	0	0	0	0	0	AT1G11608	1.00016	1.01126	0.989053	0.97804	-0.0320349	1	1
1137	AT1G11610	2	4	2	2	0	0	AT1G11610	2.64475	3.65568	1.63382	0.446928	-1.16189	0.433459	0.706208
1138	AT1G11620	0	0	0	0	0	0	AT1G11620	1.00016	1.01126	0.989053	0.97804	-0.0320349	1	1
1139	AT1G11630	230	291	172	235	214	224	AT1G11630	227.353	231.956	222.75	0.960311	-0.0584264	0.681016	0.967306
1140	AT1G11650	8780	10547	8747	9420	8741	8390	AT1G11650	9082.9	9417.59	8748.2	0.928921	-0.106373	0.0377108	0.0952432
1141	AT1G11655	5	5	4	12	0	0	AT1G11655	5.28492	5.71216	4.85768	0.850411	-0.233768	0.912958	1
1142	AT1G11660	1062	1272	1120	1176	1072	1005	AT1G11660	1116.67	1160.88	1072.45	0.923822	-0.114313	0.127632	0.269008
1143	AT1G11670	4035	4935	3668	5557	5000	4684	AT1G11670	4625.68	4230.87	5020.49	1.18663	0.246874	0.0062856	0.0195034
1144	AT1G11680	3248	3656	2955	4473	4138	3908	AT1G11680	3716.67	3308.32	4125.02	1.24686	0.318303	3.42192e-08	2.33853e-07
1145	AT1G11684	0	0	0	3	0	0	AT1G11684	1.48374	1.01126	1.95621	1.93443	0.951907	0.707606	0.989969
1146	AT1G11690	1	4	0	0	0	0	AT1G11690	1.79451	2.59997	0.989053	0.380409	-1.39438	0.456798	0.732503
1147	AT1G11700	453	515	383	267	270	237	AT1G11700	354.79	453.513	256.066	0.564628	-0.824628	3.00379e-13	3.19723e-12
1148	AT1G11710	61	115	108	135	94	111	AT1G11710	104.519	96.1931	112.844	1.1731	0.23033	0.400732	0.666605
1149	AT1G11720	560	633	530	1084	1011	1000	AT1G11720	800.071	579.354	1020.79	1.76194	0.817167	2.09142e-22	3.84453e-21
1150	AT1G11730	4	0	2	7	5	14	AT1G11730	6.3404	3.1017	9.57909	3.08833	1.62683	0.0536426	0.129071
1151	AT1G11740	168	174	158	103	124	99	AT1G11740	138.871	169.215	108.528	0.641364	-0.640785	0.000185152	0.000787194
1152	AT1G11750	1062	1336	1000	1321	1249	1153	AT1G11750	1182.83	1138.13	1227.53	1.07854	0.109084	0.205175	0.395745
1153	AT1G11755	264	235	237	279	269	266	AT1G11755	259.319	249.371	269.268	1.07979	0.110752	0.367706	0.625121
1154	AT1G11760	224	281	225	296	287	265	AT1G11760	263.014	245.613	280.415	1.1417	0.191178	0.143952	0.297076
1155	AT1G11765	0	0	0	0	0	0	AT1G11765	1.00016	1.01126	0.989053	0.97804	-0.0320349	1	1
1156	AT1G11770	7	0	6	3	1	1	AT1G11770	4.09046	5.55804	2.62288	0.471907	-1.08342	0.36181	0.61846
1157	AT1G11780	364	384	300	501	430	405	AT1G11780	396.711	352.583	440.838	1.25031	0.322283	0.00283677	0.00954926
1158	AT1G11785	23	36	33	76	57	46	AT1G11785	45.8451	31.8666	59.8237	1.87732	0.908674	0.00200427	0.00698809
1159	AT1G11790	565	681	505	619	600	546	AT1G11790	584.833	587.119	582.546	0.99221	-0.0112821	0.867419	1
1160	AT1G11800	204	248	151	206	177	167	AT1G11800	192.111	202.154	182.067	0.900637	-0.150983	0.361704	0.618395
1161	AT1G11810	1	3	3	2	1	4	AT1G11810	3.32785	3.35522	3.30049	0.983689	-0.0237255	1	1
1162	AT1G11820	291	401	276	449	418	366	AT1G11820	365.618	324.161	407.074	1.25577	0.328578	0.0138099	0.039416
1163	AT1G11840	6558	8257	6457	8219	7738	7642	AT1G11840	7451.3	7125.26	7777.35	1.09152	0.126335	0.0386481	0.0972404
1164	AT1G11850	30	46	30	15	24	14	AT1G11850	27.4079	36.3243	18.4915	0.509068	-0.97407	0.00973185	0.0288666
1165	AT1G11860	3881	4652	3886	5288	5052	4965	AT1G11860	4606	4167.23	5044.77	1.21058	0.275698	8.98044e-07	5.31135e-06
1166	AT1G11870	289	403	318	547	456	408	AT1G11870	402.177	339.02	465.334	1.37259	0.456896	0.00253735	0.00864003
1167	AT1G11880	107	136	122	129	115	102	AT1G11880	119.237	123.565	114.91	0.92996	-0.104759	0.580728	0.86795
1168	AT1G11890	870	1141	970	988	868	792	AT1G11890	936.727	1000.61	872.84	0.872303	-0.197098	0.0633282	0.14904
1169	AT1G11900	119	116	118	129	101	95	AT1G11900	113.987	120.063	107.91	0.89878	-0.15396	0.444602	0.719091
1170	AT1G11905	394	470	382	464	428	452	AT1G11905	431.362	418.815	443.909	1.05992	0.083952	0.439306	0.712752
1171	AT1G11910	20384	24520	19296	25799	23956	23211	AT1G11910	22777.3	21513.9	24040.6	1.11744	0.160198	0.00400729	0.0130425
1172	AT1G11915	2	0	6	0	12	6	AT1G11915	5.41127	3.83348	6.98905	1.82316	0.866443	0.464309	0.741107
1173	AT1G11920	2	2	6	2	0	0	AT1G11920	3.0446	4.45538	1.63382	0.366708	-1.44729	0.294581	0.527191
1174	AT1G11925	0	0	0	0	0	0	AT1G11925	1.00016	1.01126	0.989053	0.97804	-0.0320349	1	1
1175	AT1G11930	1202	1388	1062	1451	1344	1246	AT1G11930	1278.37	1224.63	1332.1	1.08776	0.121365	0.115857	0.248176
1176	AT1G11940	165	221	195	230	221	216	AT1G11940	208.374	195.944	220.804	1.12687	0.172326	0.232069	0.437113
1177	AT1G11950	101	148	100	174	195	126	AT1G11950	140.746	117.408	164.084	1.39756	0.482909	0.0458378	0.112612
1178	AT1G11960	1078	1065	984	1720	1487	1517	AT1G11960	1305.26	1053.7	1556.83	1.47749	0.563144	4.21318e-15	5.10119e-14
1179	AT1G11970	0	0	0	0	0	0	AT1G11970	1.00016	1.01126	0.989053	0.97804	-0.0320349	1	1
1180	AT1G11980	0	0	0	0	0	0	AT1G11980	1.00016	1.01126	0.989053	0.97804	-0.0320349	1	1
1181	AT1G11990	0	0	0	0	2	0	AT1G11990	1.33349	1.01126	1.65572	1.63728	0.711304	0.84937	1
1182	AT1G12000	701	738	634	861	858	724	AT1G12000	751.747	697.598	805.897	1.15525	0.208199	0.01383	0.0394607
1183	AT1G12010	1	0	0	0	0	0	AT1G12010	1.17261	1.35617	0.989053	0.729298	-0.455421	0.987682	1
1184	AT1G12020	82	77	91	79	121	119	AT1G12020	96.018	85.5784	106.458	1.24398	0.314959	0.199647	0.386756
1185	AT1G12030	5	6	4	0	1	0	AT1G12030	3.67275	6.02311	1.32239	0.219552	-2.18737	0.0694713	0.161293
1186	AT1G12040	19	22	10	2	0	3	AT1G12040	10.2966	17.9595	2.63382	0.146654	-2.76951	8.58496e-05	0.000384845
1187	AT1G12050	736	971	701	1295	1302	1165	AT1G12050	1023.37	805.933	1240.81	1.5396	0.622553	1.8422e-11	1.71405e-10
1188	AT1G12060	90	93	85	160	184	164	AT1G12060	129.876	91.1805	168.571	1.84876	0.886557	6.02747e-07	3.63358e-06
1189	AT1G12064	436	472	403	918	929	974	AT1G12064	686.33	441.387	931.273	2.10988	1.07716	1.36024e-33	3.92436e-32
1190	AT1G12070	29	20	29	46	44	34	AT1G12070	34.679	27.5393	41.8188	1.51852	0.602662	0.0668296	0.156173
1191	AT1G12080	16	37	24	57	37	54	AT1G12080	38.1315	26.5646	49.6984	1.87085	0.903697	0.00591378	0.0184899
1192	AT1G12090	903	989	787	1187	979	1161	AT1G12090	998.344	899.694	1096.99	1.2193	0.286049	0.00288731	0.00970018
1193	AT1G12100	0	5	1	1	0	0	AT1G12100	2.11642	2.92141	1.31144	0.448907	-1.15551	0.491887	0.771936
1194	AT1G12110	2028	2291	1965	1942	1925	1906	AT1G12110	2007.65	2111.24	1904.06	0.901871	-0.149007	0.0196691	0.0538186
1195	AT1G12120	1779	2251	1872	2104	2108	1985	AT1G12120	2011.74	1979.86	2043.62	1.0322	0.0457279	0.508548	0.79184
1196	AT1G12130	2215	2629	2220	2491	2188	2172	AT1G12130	2314.42	2371.46	2257.39	0.951896	-0.071124	0.250018	0.462972
1197	AT1G12140	951	1194	982	720	674	640	AT1G12140	860.202	1049.3	671.107	0.639577	-0.644809	1.90131e-15	2.35123e-14
1198	AT1G12150	11	23	29	15	22	16	AT1G12150	20.3776	22.2637	18.4915	0.830568	-0.26783	0.578975	0.865805
1199	AT1G12160	59	110	66	199	251	271	AT1G12160	159.083	79.0218	239.144	3.0263	1.59756	3.83908e-10	3.17465e-09
1200	AT1G12170	0	0	0	0	0	0	AT1G12170	1.00016	1.01126	0.989053	0.97804	-0.0320349	1	1
1201	AT1G12180	0	2	0	0	0	0	AT1G12180	1.31111	1.63316	0.989053	0.605607	-0.723546	0.824525	1
1202	AT1G12190	0	0	0	0	0	0	AT1G12190	1.00016	1.01126	0.989053	0.97804	-0.0320349	1	1
1203	AT1G12200	2946	3521	3037	3145	3152	3039	AT1G12200	3134.94	3191.32	3078.56	0.964666	-0.0518982	0.365799	0.622735
1204	AT1G12210	141	151	119	180	137	131	AT1G12210	143.621	138.89	148.352	1.06813	0.0950839	0.578392	0.865266
1205	AT1G12211	1	0	0	1	2	1	AT1G12211	1.8338	1.35617	2.31144	1.70439	0.769251	0.734209	1
1206	AT1G12220	169	167	162	256	284	193	AT1G12220	205.662	168.805	242.52	1.43669	0.522749	0.0061243	0.0190699
1207	AT1G12230	344	368	323	685	681	588	AT1G12230	496.854	348.884	644.823	1.84825	0.886156	5.61862e-19	8.68031e-18
1208	AT1G12240	297	292	270	211	183	215	AT1G12240	245.942	290.205	201.679	0.694954	-0.52501	7.7088e-05	0.000348092
1209	AT1G12244	86	105	66	92	94	89	AT1G12244	89.2141	86.7797	91.6486	1.05611	0.0787549	0.759913	1
1210	AT1G12250	85	106	51	129	109	99	AT1G12250	96.6624	81.4147	111.91	1.37457	0.458979	0.0553387	0.1326
1211	AT1G12260	0	4	2	2	4	10	AT1G12260	4.63317	2.96586	6.30049	2.12434	1.08702	0.309073	0.547522
1212	AT1G12270	804	949	831	1151	1093	1068	AT1G12270	980.568	868.748	1092.39	1.25743	0.330477	2.23447e-05	0.000109553
1213	AT1G12280	79	100	87	86	113	85	AT1G12280	92.4941	90.2739	94.7142	1.04919	0.0692719	0.766877	1
1214	AT1G12290	127	111	82	101	124	137	AT1G12290	114.512	108.473	120.55	1.11134	0.152294	0.508052	0.791234
1215	AT1G12300	84	89	84	140	165	117	AT1G12300	113.817	87.5119	140.123	1.60119	0.679144	0.000296065	0.00121197
1216	AT1G12310	2859	3340	2640	2856	2689	2707	AT1G12310	2842.16	2963.94	2720.39	0.91783	-0.123702	0.0344786	0.0880113
1217	AT1G12320	99	169	146	32	32	32	AT1G12320	86.1175	139.596	32.6387	0.233808	-2.0966	8.96075e-11	7.82118e-10
1218	AT1G12330	299	338	290	592	538	509	AT1G12330	426.574	312.306	540.841	1.73177	0.792244	5.83464e-14	6.54857e-13
1219	AT1G12340	40	55	39	26	51	38	AT1G12340	42.4041	45.7705	39.0378	0.852902	-0.229548	0.436204	0.709305
1220	AT1G12350	457	599	403	570	471	528	AT1G12350	502.935	488.12	517.749	1.0607	0.085016	0.554564	0.842447
1221	AT1G12360	2526	2995	2391	2467	2339	2189	AT1G12360	2479.48	2653.31	2305.65	0.86897	-0.202621	0.000843003	0.00316647
1222	AT1G12370	431	456	377	463	490	472	AT1G12370	448.183	425.447	470.92	1.10689	0.146505	0.159217	0.321936
1223	AT1G12380	9	8	2	12	8	8	AT1G12380	8.75244	7.31386	10.191	1.39338	0.478594	0.529609	0.815405
1224	AT1G12390	436	485	425	462	403	480	AT1G12390	448.756	453.248	444.265	0.980181	-0.0288805	0.786334	1
1225	AT1G12400	235	296	227	252	285	250	AT1G12400	257.673	254.782	260.564	1.02269	0.0323719	0.849051	1
1226	AT1G12410	1819	2121	1884	2004	1769	1793	AT1G12410	1895.94	1957.5	1834.38	0.937105	-0.0937176	0.15361	0.31255
1227	AT1G12411	0	0	0	0	0	0	AT1G12411	1.00016	1.01126	0.989053	0.97804	-0.0320349	1	1
1228	AT1G12420	350	451	334	383	424	365	AT1G12420	384.067	380.672	387.463	1.01784	0.0255104	0.874018	1
1229	AT1G12423	0	0	0	0	0	0	AT1G12423	1.00016	1.01126	0.989053	0.97804	-0.0320349	1	1
1230	AT1G12430	312	453	301	417	374	369	AT1G12430	369.775	356.459	383.091	1.07471	0.10395	0.500668	0.782466
1231	AT1G12440	2256	2899	2268	2835	2570	2543	AT1G12440	2552.95	2486.62	2619.29	1.05335	0.0749882	0.329555	0.5765
1232	AT1G12450	229	275	204	205	210	197	AT1G12450	220.377	238.009	202.745	0.851839	-0.231348	0.0873354	0.195815
1233	AT1G12451	0	0	0	0	0	0	AT1G12451	1.00016	1.01126	0.989053	0.97804	-0.0320349	1	1
1234	AT1G12460	91	114	96	152	112	145	AT1G12460	118.812	101.965	135.658	1.33044	0.411908	0.0255826	0.0676452
1235	AT1G12470	889	1186	881	1138	1101	1109	AT1G12470	1047.03	989.53	1104.53	1.11622	0.158618	0.0639019	0.150209
1236	AT1G12480	31	47	27	34	31	31	AT1G12480	34.2654	35.9139	32.6168	0.908195	-0.138926	0.672729	0.96085
1237	AT1G12490	13	10	6	2	0	0	AT1G12490	6.18541	10.737	1.63382	0.152168	-2.71627	0.00362376	0.0118924
1238	AT1G12500	226	308	210	172	145	138	AT1G12500	200.07	249.367	150.773	0.604621	-0.725898	2.74903e-06	1.52977e-05
1239	AT1G12520	490	658	540	637	643	675	AT1G12520	606.11	566.538	645.682	1.1397	0.188651	0.0448242	0.110531
1240	AT1G12530	564	640	436	439	439	489	AT1G12530	500.676	549.503	451.85	0.822288	-0.282284	0.0306339	0.0792229
1241	AT1G12540	0	0	0	0	0	0	AT1G12540	1.00016	1.01126	0.989053	0.97804	-0.0320349	1	1
1242	AT1G12550	52	47	58	103	79	62	AT1G12550	67.6846	54.1744	81.1948	1.49877	0.583775	0.0226412	0.0608972
1243	AT1G12560	23	30	30	0	0	2	AT1G12560	15.2952	28.9347	1.65572	0.0572227	-4.12727	4.90108e-10	4.00537e-09
1244	AT1G12570	2	2	2	8	0	2	AT1G12570	3.63429	3.03378	4.23481	1.39588	0.481179	0.719661	1
1245	AT1G12580	3277	3942	3198	3216	3040	2755	AT1G12580	3231.53	3493.62	2969.45	0.849964	-0.234526	0.000206873	0.000872181
1246	AT1G12600	11	32	28	81	43	66	AT1G12600	44.0712	24.7068	63.4356	2.56753	1.36038	0.000972456	0.0035971
1247	AT1G12610	283	301	251	99	88	88	AT1G12610	186.497	281.422	91.5719	0.32539	-1.61976	1.81894e-25	3.84506e-24
1248	AT1G12620	172	199	191	221	196	270	AT1G12620	208.833	190.096	227.57	1.19713	0.259579	0.113565	0.244183
1249	AT1G12630	0	1	0	0	0	0	AT1G12630	1.15563	1.32221	0.989053	0.74803	-0.418832	0.987654	1
1250	AT1G12640	1388	1564	1350	981	910	878	AT1G12640	1179.56	1445.86	913.25	0.63163	-0.662849	3.24882e-19	5.09145e-18
1251	AT1G12650	537	572	478	648	588	542	AT1G12650	560.267	533.973	586.562	1.09849	0.135517	0.149984	0.306841
1252	AT1G12660	0	0	0	0	0	0	AT1G12660	1.00016	1.01126	0.989053	0.97804	-0.0320349	1	1
1253	AT1G12663	0	0	0	0	0	0	AT1G12663	1.00016	1.01126	0.989053	0.97804	-0.0320349	1	1
1254	AT1G12665	1	0	0	0	0	0	AT1G12665	1.17261	1.35617	0.989053	0.729298	-0.455421	0.987682	1
1255	AT1G12672	5	6	0	0	0	0	AT1G12672	2.79528	4.60151	0.989053	0.214941	-2.21799	0.116203	0.248676
1256	AT1G12680	1061	1221	965	891	906	972	AT1G12680	1001.91	1089.59	914.235	0.839062	-0.253151	0.000874053	0.00327045
1257	AT1G12700	69	91	47	108	97	98	AT1G12700	85.3085	69.8103	100.807	1.44401	0.53008	0.0168446	0.0469446
1258	AT1G12710	216	329	205	287	298	265	AT1G12710	265.926	250.671	281.18	1.12171	0.165699	0.359315	0.615355
1259	AT1G12730	95	90	69	139	111	119	AT1G12730	104.377	86.2858	122.467	1.41932	0.505202	0.00976517	0.0289434
1260	AT1G12740	43	56	19	15	17	32	AT1G12740	31.0832	40.0082	22.1582	0.553841	-0.852457	0.0976473	0.215615
1261	AT1G12750	130	220	128	199	195	144	AT1G12750	168.947	159.75	178.144	1.11514	0.157229	0.569281	0.855069
1262	AT1G12760	2323	2567	2285	1826	1576	1538	AT1G12760	2020.1	2412.53	1627.67	0.67467	-0.567745	1.54561e-18	2.32577e-17
1263	AT1G12770	621	755	662	971	1063	963	AT1G12770	837.301	685.242	989.359	1.44381	0.52988	1.24149e-10	1.07055e-09
1264	AT1G12775	34	50	39	54	50	46	AT1G12775	46.2721	42.1463	50.3979	1.19578	0.257958	0.39636	0.66111
1265	AT1G12780	16597	19707	16061	20542	18982	18391	AT1G12780	18321.3	17561.5	19081.1	1.08653	0.119733	0.0187699	0.0517014
1266	AT1G12790	206	235	208	303	258	247	AT1G12790	243.032	219.059	267.005	1.21887	0.285548	0.030393	0.0786897
1267	AT1G12800	1722	2056	1529	2387	2356	2204	AT1G12800	2034.1	1777.67	2290.52	1.2885	0.365693	8.00992e-08	5.29441e-07
1268	AT1G12805	7835	9681	7935	11830	10556	10584	AT1G12805	9697.63	8533.79	10861.5	1.27276	0.347963	4.83891e-09	3.56671e-08
1269	AT1G12810	2089	2641	2056	3708	3373	3502	AT1G12810	2880.76	2273.45	3488.06	1.53426	0.617543	1.8376e-24	3.68958e-23
1270	AT1G12820	1334	1445	1337	1394	1385	1175	AT1G12820	1344.67	1385.61	1303.73	0.940903	-0.0878819	0.247134	0.458944
1271	AT1G12830	537	761	545	693	676	665	AT1G12830	643.978	616.554	671.402	1.08896	0.122951	0.289429	0.519961
1272	AT1G12840	4179	4770	3919	4055	3674	3553	AT1G12840	4017.85	4318.43	3717.26	0.86079	-0.216267	0.000126793	0.00055272
1273	AT1G12845	61	39	52	71	65	49	AT1G12845	57.2685	52.6586	61.8785	1.17509	0.232767	0.34666	0.59877
1274	AT1G12850	1143	1293	1053	1439	1327	1382	AT1G12850	1269.72	1171.54	1367.9	1.16761	0.223562	0.00210374	0.00729842
1275	AT1G12855	0	0	0	0	0	2	AT1G12855	1.33349	1.01126	1.65572	1.63728	0.711304	0.84937	1
1276	AT1G12860	247	287	191	386	359	358	AT1G12860	303.879	243.328	364.43	1.49769	0.582739	1.81856e-06	1.03528e-05
1277	AT1G12870	2	0	0	0	0	0	AT1G12870	1.34507	1.70108	0.989053	0.581425	-0.782334	0.823113	1
1278	AT1G12880	449	511	405	448	333	331	AT1G12880	412.73	458.708	366.751	0.79953	-0.322775	0.0114728	0.0334113
1279	AT1G12890	48	61	55	30	51	24	AT1G12890	45.8713	56.0819	35.6606	0.635867	-0.653203	0.0252538	0.0668863
1280	AT1G12900	1758	1951	1602	1205	1097	1015	AT1G12900	1438.42	1783.38	1093.46	0.613142	-0.705706	6.97812e-24	1.36777e-22
1281	AT1G12910	719	833	634	958	925	811	AT1G12910	810.924	733.347	888.501	1.21157	0.276879	0.00158138	0.00561806
1282	AT1G12920	3087	3731	2910	4727	4423	4391	AT1G12920	3861.51	3260.12	4462.91	1.36894	0.45306	3.832e-15	4.65001e-14
1283	AT1G12930	588	692	481	849	800	736	AT1G12930	688.319	589.943	786.695	1.33351	0.415228	3.65121e-05	0.00017339
1284	AT1G12938	0	0	0	0	0	0	AT1G12938	1.00016	1.01126	0.989053	0.97804	-0.0320349	1	1
1285	AT1G12940	0	4	0	2	3	0	AT1G12940	2.44444	2.25506	2.63382	1.16796	0.223995	1	1
1286	AT1G12950	24	41	13	22	13	9	AT1G12950	21.0366	26.6582	15.4149	0.57824	-0.790259	0.150748	0.307994
1287	AT1G12960	0	0	0	0	0	0	AT1G12960	1.00016	1.01126	0.989053	0.97804	-0.0320349	1	1
1288	AT1G12970	314	330	230	288	261	259	AT1G12970	280.419	293.669	267.17	0.909765	-0.136433	0.2803	0.50699
1289	AT1G12980	0	2	0	4	2	0	AT1G12980	2.28921	1.63316	2.94526	1.80341	0.850731	0.647294	0.934964
1290	AT1G12990	662	752	565	725	608	552	AT1G12990	642.681	663.977	621.385	0.935854	-0.095645	0.416778	0.686372
1291	AT1G13000	404	516	429	565	490	468	AT1G13000	477.871	453.272	502.47	1.10854	0.148663	0.143004	0.295495
1292	AT1G13020	1546	1799	1427	1707	1750	1647	AT1G13020	1642.22	1600.8	1683.64	1.05175	0.0727891	0.30488	0.541492
1293	AT1G13030	159	223	156	171	206	211	AT1G13030	187.877	180.636	195.117	1.08017	0.111253	0.531826	0.817912
1294	AT1G13040	64	49	31	57	64	84	AT1G13040	59.0189	49.3395	68.6984	1.39236	0.477533	0.143206	0.295828
1295	AT1G13050	36	39	50	93	70	74	AT1G13050	61.148	43.3251	78.9709	1.82275	0.86612	0.000575349	0.00223837
1296	AT1G13060	3397	4119	3223	3872	3718	3448	AT1G13060	3618.43	3598.93	3637.93	1.01084	0.0155522	0.850261	1
1297	AT1G13080	24043	29081	23117	11272	10232	9930	AT1G13080	17953.9	25552.2	10355.6	0.405272	-1.30304	3.69586e-80	3.28594e-78
1298	AT1G13090	1107	1370	1108	1911	1539	1583	AT1G13090	1430.17	1202.61	1657.74	1.37845	0.463043	1.28317e-05	6.52156e-05
1299	AT1G13100	143	161	120	48	33	13	AT1G13100	87.4206	143.044	31.7969	0.222287	-2.1695	3.3672e-21	5.87232e-20
1300	AT1G13110	520	559	480	150	99	99	AT1G13110	320.062	524.778	115.347	0.219802	-2.18573	5.33705e-66	3.55882e-64
1301	AT1G13120	491	685	511	529	472	467	AT1G13120	524.752	564.972	484.531	0.85762	-0.22159	0.0465352	0.11415
1302	AT1G13130	0	0	0	0	0	0	AT1G13130	1.00016	1.01126	0.989053	0.97804	-0.0320349	1	1
1303	AT1G13140	58	47	29	37	51	33	AT1G13140	43.4273	45.9373	40.9173	0.890721	-0.166955	0.633661	0.920764
1304	AT1G13150	11	20	11	25	5	5	AT1G13150	13.6578	14.9337	12.382	0.829136	-0.27032	0.744395	1
1305	AT1G13160	736	792	672	1033	939	1041	AT1G13160	866.99	739.966	994.014	1.34332	0.425806	1.50583e-07	9.65306e-07
1306	AT1G13170	442	531	476	796	671	702	AT1G13170	601.511	487.746	715.275	1.46649	0.552367	1.85965e-09	1.43244e-08
1307	AT1G13180	741	896	629	765	651	677	AT1G13180	724.514	758.747	690.281	0.909764	-0.136436	0.193962	0.378301
1308	AT1G13190	1308	1730	1477	1656	1569	1548	AT1G13190	1544.44	1515.02	1573.86	1.03884	0.0549681	0.499436	0.781125
1309	AT1G13195	371	532	341	336	256	286	AT1G13195	352.783	415.59	289.977	0.697749	-0.519219	0.00505936	0.0161175
1310	AT1G13200	0	0	0	0	0	0	AT1G13200	1.00016	1.01126	0.989053	0.97804	-0.0320349	1	1
1311	AT1G13210	8516	9622	7963	7746	7228	6880	AT1G13210	7980.57	8760.28	7200.86	0.82199	-0.282808	6.79999e-08	4.51661e-07
1312	AT1G13220	598	693	620	771	681	727	AT1G13220	680.993	643.104	718.882	1.11783	0.160703	0.0663687	0.15521
1313	AT1G13230	8	15	15	10	13	6	AT1G13230	12.156	13.7658	10.5462	0.76612	-0.384357	0.533002	0.819303
1314	AT1G13245	472	585	511	377	365	332	AT1G13245	441.093	527.324	354.862	0.672949	-0.571432	3.24114e-08	2.21888e-07
1315	AT1G13250	11	18	14	8	3	8	AT1G13250	11.3064	15.378	7.23481	0.470466	-1.08784	0.0742665	0.170708
1316	AT1G13260	2495	2834	2444	1197	1054	1089	AT1G13260	1856.3	2611.39	1101.22	0.421698	-1.24572	1.3826e-77	1.16096e-75
1317	AT1G13270	782	1020	816	1056	885	865	AT1G13270	901.334	877.906	924.762	1.05337	0.0750152	0.485076	0.764866
1318	AT1G13280	561	670	539	1297	1222	1191	AT1G13280	908.93	594.403	1223.46	2.0583	1.04145	1.06734e-37	3.49435e-36
1319	AT1G13290	0	0	0	0	0	0	AT1G13290	1.00016	1.01126	0.989053	0.97804	-0.0320349	1	1
1320	AT1G13300	0	2	0	0	0	0	AT1G13300	1.31111	1.63316	0.989053	0.605607	-0.723546	0.824525	1
1321	AT1G13310	4	9	0	2	0	0	AT1G13310	3.41164	5.18945	1.63382	0.314836	-1.66733	0.169634	0.338398
1322	AT1G13320	1580	1855	1449	1891	1636	1671	AT1G13320	1675.36	1637.76	1712.95	1.04592	0.0647661	0.368976	0.626731
1323	AT1G13330	144	203	149	201	209	189	AT1G13330	182.605	166.756	198.455	1.1901	0.251078	0.107439	0.233093
1324	AT1G13340	1056	1255	1029	1182	1064	1142	AT1G13340	1119.28	1121.19	1117.38	0.996608	-0.00490123	0.928477	1
1325	AT1G13350	838	1037	866	987	916	882	AT1G13350	919.397	920.277	918.517	0.998088	-0.00276178	0.957507	1
1326	AT1G13360	3098	3463	3010	3579	3479	3412	AT1G13360	3333.96	3216.12	3451.81	1.07328	0.102033	0.081147	0.18402
1327	AT1G13370	2	19	4	4	0	3	AT1G13370	6.15466	9.03072	3.2786	0.363049	-1.46176	0.254226	0.468976
1328	AT1G13380	431	576	416	681	597	696	AT1G13380	564.077	476.621	651.534	1.36699	0.450998	4.43434e-05	0.000207822
1329	AT1G13390	2612	2975	2499	2566	2463	2346	AT1G13390	2573.18	2715.14	2431.23	0.895436	-0.159338	0.00863031	0.0259071
1330	AT1G13400	0	0	1	0	1	0	AT1G13400	1.34452	1.36666	1.32239	0.967605	-0.0475103	1	1
1331	AT1G13410	123	135	93	127	110	86	AT1G13410	112.866	118.466	107.265	0.905456	-0.143284	0.444035	0.718559
1332	AT1G13420	24	26	27	101	92	87	AT1G13420	60.0931	26.9696	93.2167	3.45636	1.78925	2.34662e-11	2.16855e-10
1333	AT1G13430	18	26	22	95	79	76	AT1G13430	53.2028	23.1231	83.2824	3.60169	1.84867	1.06829e-10	9.27371e-10
1334	AT1G13440	16919	20505	16706	21809	20495	19699	AT1G13440	19289.9	18149.9	20429.9	1.12562	0.170722	0.000760429	0.00288298
1335	AT1G13450	650	891	689	877	864	806	AT1G13450	793.759	747.13	840.388	1.12482	0.169697	0.0685589	0.159543
1336	AT1G13460	861	991	673	782	780	710	AT1G13460	797.538	845.315	749.761	0.886962	-0.173057	0.141428	0.292666
1337	AT1G13470	0	0	0	0	0	0	AT1G13470	1.00016	1.01126	0.989053	0.97804	-0.0320349	1	1
1338	AT1G13480	128	170	124	36	38	36	AT1G13480	89.6762	142.091	37.2616	0.262238	-1.93105	3.20329e-18	4.72863e-17
1339	AT1G13485	0	0	0	0	0	0	AT1G13485	1.00016	1.01126	0.989053	0.97804	-0.0320349	1	1
1340	AT1G13490	0	0	3	3	0	2	AT1G13490	2.35017	2.07746	2.62288	1.26254	0.336331	0.890085	1
1341	AT1G13500	2	6	0	1	2	0	AT1G13500	2.77244	3.56678	1.97811	0.554591	-0.850503	0.543157	0.830347
1342	AT1G13510	85	114	101	9	6	6	AT1G13510	54.7814	101.672	7.89053	0.0776074	-3.68766	9.50552e-29	2.30078e-27
1343	AT1G13520	1919	2333	1765	447	446	405	AT1G13520	1222.19	2015.62	428.762	0.21272	-2.23297	4.09746e-93	4.76391e-91
1344	AT1G13530	269	323	271	137	140	110	AT1G13530	209.516	290.542	128.489	0.442239	-1.1771	3.02122e-16	3.9536e-15
1345	AT1G13540	160	153	172	180	121	143	AT1G13540	155.96	164.901	147.019	0.891556	-0.165602	0.400382	0.66613
1346	AT1G13550	162	233	161	73	117	77	AT1G13550	137.874	186.557	89.1899	0.478083	-1.06467	2.9363e-06	1.62798e-05
1347	AT1G13560	1023	1246	1009	1287	1173	1203	AT1G13560	1153.9	1099.9	1207.9	1.09819	0.135133	0.0741837	0.170546
1348	AT1G13570	647	735	671	840	738	764	AT1G13570	731.825	691.19	772.46	1.11758	0.160378	0.058651	0.139542
1349	AT1G13580	495	512	507	388	353	337	AT1G13580	433.605	511.136	356.075	0.696634	-0.521527	7.13602e-07	4.26406e-06
1350	AT1G13590	3281	4184	3336	1966	1652	1677	AT1G13590	2681.88	3619.29	1744.47	0.481991	-1.05292	3.37036e-30	8.67494e-29
1351	AT1G13600	72	52	46	16	25	21	AT1G13600	39.9216	58.3626	21.4806	0.368053	-1.44201	2.68726e-05	0.000130297
1352	AT1G13605	0	0	0	0	2	0	AT1G13605	1.33349	1.01126	1.65572	1.63728	0.711304	0.84937	1
1353	AT1G13607	0	0	0	0	0	0	AT1G13607	1.00016	1.01126	0.989053	0.97804	-0.0320349	1	1
1354	AT1G13608	2	0	0	0	0	0	AT1G13608	1.34507	1.70108	0.989053	0.581425	-0.782334	0.823113	1
1355	AT1G13609	104	114	95	67	46	55	AT1G13609	81.1744	106.093	56.2556	0.530247	-0.915264	3.94494e-05	0.000186233
1356	AT1G13610	192	238	153	140	102	77	AT1G13610	150.703	195.616	105.79	0.540802	-0.886827	0.00013852	0.000599901
1357	AT1G13620	7	2	6	5	7	5	AT1G13620	6.39046	6.17993	6.60098	1.06813	0.0950892	0.949889	1
1358	AT1G13630	96	91	56	113	90	59	AT1G13630	84.7034	82.3215	87.0853	1.05787	0.0811602	0.816617	1
1359	AT1G13635	0	1	2	2	0	0	AT1G13635	1.83342	2.03301	1.63382	0.803649	-0.315363	0.98449	1
1360	AT1G13640	2287	2822	2162	7025	6438	6159	AT1G13640	4450.22	2435.7	6464.75	2.65417	1.40826	1.45149e-90	1.57957e-88
1361	AT1G13650	2	2	0	0	0	2	AT1G13650	1.98935	2.32298	1.65572	0.712756	-0.48852	0.848023	1
1362	AT1G13670	14	8	0	4	0	0	AT1G13670	5.30311	8.32762	2.2786	0.273619	-1.86976	0.176142	0.349382
1363	AT1G13680	0	0	0	0	0	0	AT1G13680	1.00016	1.01126	0.989053	0.97804	-0.0320349	1	1
1364	AT1G13690	565	725	610	775	697	660	AT1G13690	670.645	638.118	703.171	1.10195	0.140053	0.11789	0.251554
1365	AT1G13700	26	31	24	28	25	21	AT1G13700	26.7486	28.148	25.3492	0.900569	-0.151091	0.716749	0.99943
1366	AT1G13710	30	51	14	64	59	59	AT1G13710	46.5738	32.1926	60.9551	1.89345	0.921017	0.00311911	0.0104057
1367	AT1G13730	888	922	753	1021	999	921	AT1G13730	915.874	861.604	970.145	1.12598	0.171176	0.0319769	0.0823518
1368	AT1G13740	2142	2573	1964	3615	3704	3422	AT1G13740	2889.82	2237.89	3541.75	1.58263	0.662323	1.48076e-26	3.26463e-25
1369	AT1G13750	28	33	27	112	99	78	AT1G13750	63.3111	30.5259	96.0963	3.14803	1.65445	1.82842e-10	1.55937e-09
1370	AT1G13755	0	0	0	0	0	0	AT1G13755	1.00016	1.01126	0.989053	0.97804	-0.0320349	1	1
1371	AT1G13760	0	0	0	0	0	0	AT1G13760	1.00016	1.01126	0.989053	0.97804	-0.0320349	1	1
1372	AT1G13770	329	459	371	493	458	468	AT1G13770	428.829	389.066	468.592	1.2044	0.268317	0.0116286	0.0338109
1373	AT1G13780	108	129	101	296	278	245	AT1G13780	192.509	114.269	270.749	2.36939	1.24451	1.48732e-16	1.99527e-15
1374	AT1G13790	157	163	155	46	33	29	AT1G13790	98.7097	160.934	36.4855	0.226711	-2.14108	4.95158e-23	9.35505e-22
1375	AT1G13800	23	8	23	24	32	35	AT1G13800	25.3328	19.606	31.0596	1.58419	0.663746	0.0821093	0.185846
1376	AT1G13810	218	231	231	205	186	189	AT1G13810	211.103	230.128	192.078	0.834656	-0.260746	0.0700124	0.162369
1377	AT1G13820	175	194	158	227	189	212	AT1G13820	192.843	177.848	207.837	1.16862	0.22481	0.128594	0.270553
1378	AT1G13830	439	568	470	112	112	106	AT1G13830	302.924	496.084	109.763	0.221259	-2.17619	5.12715e-63	3.24393e-61
1379	AT1G13860	160	141	127	195	177	182	AT1G13860	164.349	145.177	183.521	1.26412	0.338135	0.0304938	0.0789057
1380	AT1G13870	476	521	410	513	464	467	AT1G13870	474.807	472.907	476.706	1.00803	0.0115431	0.930805	1
1381	AT1G13880	1577	1834	1536	1470	1301	1359	AT1G13880	1511.34	1661.11	1361.56	0.81967	-0.286885	2.85958e-05	0.000138086
1382	AT1G13890	0	0	0	0	0	0	AT1G13890	1.00016	1.01126	0.989053	0.97804	-0.0320349	1	1
1383	AT1G13900	1438	1797	1500	1258	1212	1240	AT1G13900	1406.38	1588.87	1223.88	0.770286	-0.376533	6.39374e-08	4.25405e-07
1384	AT1G13910	47	43	48	65	50	50	AT1G13910	51.4648	47.6521	55.2775	1.16002	0.214152	0.426109	0.698007
1385	AT1G13920	9	19	21	3	1	7	AT1G13920	11.0549	17.4869	4.62288	0.264363	-1.91941	0.00269373	0.00911627
1386	AT1G13930	1746	1982	1713	1886	1847	1750	AT1G13930	1818.17	1828.33	1808.01	0.988887	-0.0161225	0.803599	1
1387	AT1G13940	699	752	677	670	585	647	AT1G13940	672.099	716.544	627.654	0.875947	-0.191084	0.0318815	0.0821138
1388	AT1G13950	101	119	83	142	146	112	AT1G13950	117.558	102.348	132.768	1.29721	0.375417	0.0458054	0.112553
1389	AT1G13960	1732	1983	1761	1862	1623	1685	AT1G13960	1772.4	1840.87	1703.94	0.925616	-0.111514	0.0947945	0.210186
1390	AT1G13970	35	59	35	139	119	111	AT1G13970	83.1678	43.8681	122.467	2.79171	1.48115	6.85887e-11	6.0664e-10
1391	AT1G13980	1576	1878	1560	2463	2063	2068	AT1G13980	1927.5	1682.98	2172.03	1.29059	0.368025	1.16744e-05	5.9713e-05
1392	AT1G13990	1796	2095	1622	1175	1172	981	AT1G13990	1472.91	1848.37	1097.46	0.593745	-0.752085	2.7078e-18	4.0212e-17
1393	AT1G14000	2735	3309	2754	2219	2119	1973	AT1G14000	2516.2	2952.04	2080.36	0.704719	-0.504879	1.67995e-16	2.24262e-15
1394	AT1G14010	1080	1282	1063	1058	1061	933	AT1G14010	1078.34	1149.94	1006.74	0.87547	-0.19187	0.0103126	0.0303708
1395	AT1G14020	653	666	593	748	645	644	AT1G14020	657.941	644.082	671.8	1.04303	0.0607872	0.478019	0.756808
1396	AT1G14030	368	333	304	543	572	531	AT1G14030	441.619	339.526	543.711	1.60138	0.679318	4.89541e-11	4.38107e-10
1397	AT1G14040	75	83	60	94	100	98	AT1G14040	85.6528	74.0124	97.2933	1.31455	0.394574	0.0712509	0.164792
1398	AT1G14048	0	0	0	0	0	0	AT1G14048	1.00016	1.01126	0.989053	0.97804	-0.0320349	1	1
1399	AT1G14060	512	679	568	571	574	551	AT1G14060	575.339	590.607	560.071	0.948297	-0.0765884	0.392897	0.656874
1400	AT1G14070	91	133	83	80	59	49	AT1G14070	83.0163	103.253	62.7799	0.608023	-0.717803	0.0028788	0.00967639
1401	AT1G14080	16	27	20	148	137	134	AT1G14080	80.5345	22.0335	139.035	6.3102	2.65769	1.70274e-26	3.73889e-25
1402	AT1G14100	0	0	0	0	0	0	AT1G14100	1.00016	1.01126	0.989053	0.97804	-0.0320349	1	1
1403	AT1G14110	0	0	0	0	0	0	AT1G14110	1.00016	1.01126	0.989053	0.97804	-0.0320349	1	1
1404	AT1G14120	62	63	56	23	20	13	AT1G14120	40.6459	61.8879	19.4039	0.313533	-1.67331	2.34321e-07	1.475e-06
1405	AT1G14130	565	516	557	515	434	455	AT1G14130	508.822	554.293	463.351	0.835931	-0.258544	0.0316743	0.0816419
1406	AT1G14140	236	287	252	296	291	266	AT1G14140	271.648	261.213	282.082	1.07989	0.110885	0.387321	0.650299
1407	AT1G14150	20	28	31	28	34	13	AT1G14150	26.658	27.6334	25.6825	0.9294	-0.105629	0.832991	1
1408	AT1G14160	0	1	0	0	0	0	AT1G14160	1.15563	1.32221	0.989053	0.74803	-0.418832	0.987654	1
1409	AT1G14170	1091	1434	1081	1219	1057	1029	AT1G14170	1148.35	1207.4	1089.31	0.902197	-0.148485	0.130608	0.273776
1410	AT1G14180	37	63	56	84	68	53	AT1G14180	60.834	53.2651	68.4028	1.28419	0.360863	0.168352	0.336278
1411	AT1G14185	0	0	0	0	0	0	AT1G14185	1.00016	1.01126	0.989053	0.97804	-0.0320349	1	1
1412	AT1G14190	4	0	2	4	0	2	AT1G14190	3.02348	3.1017	2.94526	0.949563	-0.0746648	1	1
1413	AT1G14200	865	995	800	577	472	545	AT1G14200	709.54	893.074	526.006	0.588984	-0.763701	1.58549e-18	2.38314e-17
1414	AT1G14205	193	183	157	206	185	183	AT1G14205	185.174	180.281	190.067	1.05429	0.0762656	0.607959	0.893868
1415	AT1G14210	3289	3782	3073	3659	3518	3433	AT1G14210	3450.59	3403.58	3497.6	1.02762	0.039313	0.523776	0.808501
1416	AT1G14220	0	0	0	0	0	0	AT1G14220	1.00016	1.01126	0.989053	0.97804	-0.0320349	1	1
1417	AT1G14225	0	0	0	0	0	0	AT1G14225	1.00016	1.01126	0.989053	0.97804	-0.0320349	1	1
1418	AT1G14230	880	1058	825	905	802	874	AT1G14230	889.069	926.722	851.415	0.918738	-0.122274	0.117155	0.2503
1419	AT1G14240	2	0	2	0	0	0	AT1G14240	1.70047	2.41188	0.989053	0.410075	-1.28604	0.555304	0.842447
1420	AT1G14250	4	8	6	7	1	3	AT1G14250	5.79499	7.0109	4.57909	0.653139	-0.614539	0.513474	0.79748
1421	AT1G14260	269	285	274	214	150	198	AT1G14260	232.886	279.792	185.98	0.664706	-0.589212	1.57217e-05	7.8756e-05
1422	AT1G14270	516	560	451	654	640	602	AT1G14270	569.616	513.402	625.829	1.21898	0.28568	0.00243015	0.00830483
1423	AT1G14280	12	2	1	6	2	4	AT1G14280	5.52543	6.1275	4.92337	0.803488	-0.315652	0.842849	1
1424	AT1G14290	194	213	187	241	195	200	AT1G14290	205.483	200.616	210.351	1.04852	0.0683604	0.63062	0.917468
1425	AT1G14300	252	324	283	437	412	375	AT1G14300	346.73	289.255	404.205	1.3974	0.482748	2.38867e-05	0.000116672
1426	AT1G14310	93	106	85	87	72	86	AT1G14310	88.9804	96.2576	81.7033	0.848798	-0.236506	0.263128	0.482149
1427	AT1G14315	3	0	4	1	3	0	AT1G14315	2.88951	3.46759	2.31144	0.666583	-0.585143	0.750505	1
1428	AT1G14320	14206	17228	13891	18995	17969	17887	AT1G14320	16635.7	15194.7	18076.7	1.18967	0.250563	8.53908e-07	5.06462e-06
1429	AT1G14330	1319	1646	1294	1023	903	832	AT1G14330	1168.39	1427.66	909.123	0.636793	-0.651104	1.32344e-13	1.4495e-12
1430	AT1G14340	835	1119	935	694	640	612	AT1G14340	805.661	969.263	642.058	0.662419	-0.594184	4.55664e-09	3.36686e-08
1431	AT1G14345	188	300	256	311	236	252	AT1G14345	257.02	250.122	263.918	1.05516	0.0774585	0.699304	0.984863
1432	AT1G14350	58	70	62	121	82	91	AT1G14350	81.2409	64.8173	97.6644	1.50676	0.591453	0.00718276	0.0219616
1433	AT1G14360	948	1094	849	842	721	738	AT1G14360	864.336	969.9	758.771	0.782319	-0.354171	1.06916e-05	5.5038e-05
1434	AT1G14370	2727	3314	2712	1396	1198	1172	AT1G14370	2088.48	2935.91	1241.04	0.42271	-1.24226	3.6115e-72	2.64125e-70
1435	AT1G14380	455	455	425	817	837	791	AT1G14380	628.759	450.473	807.045	1.79155	0.84121	2.24674e-20	3.76385e-19
1436	AT1G14390	68	71	68	140	127	201	AT1G14390	113.083	70.7098	155.456	2.19851	1.13653	0.000212559	0.000892973
1437	AT1G14400	3710	4690	3721	3662	3504	3554	AT1G14400	3797.83	4061.43	3534.23	0.870195	-0.200589	0.000911417	0.00339579
1438	AT1G14410	310	452	413	813	790	695	AT1G14410	576.676	395.263	758.089	1.91794	0.939555	2.32186e-14	2.67664e-13
1439	AT1G14420	0	2	0	0	0	0	AT1G14420	1.31111	1.63316	0.989053	0.605607	-0.723546	0.824525	1
1440	AT1G14430	61	83	61	46	52	40	AT1G14430	58.0122	69.539	46.4855	0.66848	-0.581043	0.0239305	0.06386
1441	AT1G14440	259	326	283	295	318	289	AT1G14440	295.359	292.291	298.426	1.02099	0.0299699	0.830213	1
1442	AT1G14450	3279	3973	3115	2700	2794	2566	AT1G14450	3066.27	3474.45	2658.1	0.765042	-0.386389	1.59264e-09	1.23798e-08
1443	AT1G14455	9	18	24	10	6	18	AT1G14455	15.2275	18.2421	12.2129	0.669489	-0.578867	0.340186	0.590851
1444	AT1G14460	103	134	131	159	161	157	AT1G14460	141.505	124.762	158.248	1.26841	0.343016	0.0425986	0.105627
1445	AT1G14470	33	39	20	87	41	45	AT1G14470	44.6658	31.6283	57.7033	1.82442	0.867435	0.0745492	0.171232
1446	AT1G14480	58	94	67	85	53	45	AT1G14480	67.5578	74.0571	61.0585	0.824479	-0.278446	0.352011	0.605341
1447	AT1G14490	57	103	58	93	102	58	AT1G14490	78.8082	73.3122	84.3043	1.14994	0.201553	0.583695	0.869375
1448	AT1G14500	7	4	4	2	4	0	AT1G14500	4.5291	6.09103	2.96716	0.487135	-1.03761	0.327248	0.573321
1449	AT1G14510	1830	2472	1825	2344	2156	2135	AT1G14510	2118.23	2049.47	2186.99	1.0671	0.0936992	0.348361	0.600819
1450	AT1G14520	195	250	208	247	199	210	AT1G14520	218.441	219.929	216.952	0.986461	-0.0196664	0.890728	1
1451	AT1G14530	560	727	535	1282	1157	1178	AT1G14530	901.491	610.36	1192.62	1.95396	0.966402	1.77646e-32	4.93166e-31
1452	AT1G14540	13315	15808	13325	10364	9932	10070	AT1G14540	12127.1	14244.7	10009.5	0.702685	-0.50905	1.85257e-23	3.55688e-22
1453	AT1G14549	0	0	0	0	0	0	AT1G14549	1.00016	1.01126	0.989053	0.97804	-0.0320349	1	1
1454	AT1G14550	477	581	380	516	482	465	AT1G14550	482.127	481.247	483.007	1.00366	0.00526512	0.987555	1
1455	AT1G14560	842	1071	872	882	968	976	AT1G14560	933.848	934.362	933.333	0.9989	-0.00158845	0.941925	1
1456	AT1G14570	1817	2262	1842	1937	1977	1851	AT1G14570	1943.59	1985.73	1901.45	0.957558	-0.0625678	0.30762	0.545502
1457	AT1G14580	662	745	692	495	503	383	AT1G14580	581.42	706.936	455.903	0.6449	-0.632852	3.16991e-10	2.64461e-09
1458	AT1G14590	300	359	313	284	279	303	AT1G14590	306.951	327.355	286.547	0.875338	-0.192088	0.106697	0.231816
1459	AT1G14600	250	330	255	261	189	211	AT1G14600	249.472	280.479	218.465	0.778899	-0.360491	0.00841567	0.0253243
1460	AT1G14610	1881	2292	1888	2936	2580	2663	AT1G14610	2364.33	2033.48	2695.18	1.3254	0.406432	7.79826e-11	6.86156e-10
1461	AT1G14620	287	391	375	584	611	489	AT1G14620	455.393	354.857	555.929	1.56663	0.647664	1.38254e-05	6.99132e-05
1462	AT1G14630	0	4	0	5	0	0	AT1G14630	2.42802	2.25506	2.60098	1.1534	0.205892	1	1
1463	AT1G14640	219	204	207	136	113	86	AT1G14640	162.358	213.548	111.167	0.52057	-0.941835	6.11939e-09	4.46218e-08
1464	AT1G14642	5	7	8	14	2	4	AT1G14642	7.62906	7.75566	7.50245	0.967353	-0.0478862	1	1
1465	AT1G14650	1677	1842	1447	2178	2036	1967	AT1G14650	1851.97	1666.46	2037.48	1.22264	0.289999	1.10367e-05	5.66215e-05
1466	AT1G14660	118	138	98	161	126	153	AT1G14660	132.672	119.451	145.893	1.22136	0.288494	0.105075	0.229115
1467	AT1G14670	4241	5023	4225	5127	4656	4538	AT1G14670	4622.88	4527.24	4718.53	1.04225	0.0597048	0.292495	0.524493
1468	AT1G14680	5	16	6	36	26	42	AT1G14680	22.5525	9.8434	35.2616	3.58226	1.84087	3.78102e-05	0.000178867
1469	AT1G14685	916	1092	962	1400	1336	1245	AT1G14685	1155.53	998.401	1312.66	1.31477	0.394805	1.02172e-07	6.68678e-07
1470	AT1G14686	2	0	0	0	0	0	AT1G14686	1.34507	1.70108	0.989053	0.581425	-0.782334	0.823113	1
1471	AT1G14687	111	148	93	86	79	74	AT1G14687	99.0417	118.369	79.7142	0.673438	-0.570383	0.00379429	0.0123937
1472	AT1G14688	0	2	0	0	0	1	AT1G14688	1.47777	1.63316	1.32239	0.809711	-0.304522	0.985956	1
1473	AT1G14690	1009	1310	1103	1380	1478	1321	AT1G14690	1263.63	1148.38	1378.88	1.20072	0.263904	0.00191057	0.00668712
1474	AT1G14700	59	89	55	1	4	12	AT1G14700	37.6136	68.5825	6.64477	0.0968873	-3.36755	7.6892e-18	1.11154e-16
1475	AT1G14710	958	1058	888	1216	1170	1120	AT1G14710	1066.18	976.015	1156.34	1.18476	0.244594	0.00130465	0.00471435
1476	AT1G14720	244	328	257	263	287	262	AT1G14720	273.638	278.499	268.777	0.965091	-0.0512631	0.655556	0.943504
1477	AT1G14730	4	10	0	8	14	6	AT1G14730	7.8676	5.5004	10.2348	1.86074	0.895875	0.265891	0.486308
1478	AT1G14740	5979	6772	5548	6057	5685	5845	AT1G14740	5968.88	6140.74	5797.01	0.944025	-0.0831028	0.116058	0.248458
1479	AT1G14750	238	222	247	402	469	430	AT1G14750	335.085	239.915	430.255	1.79337	0.842671	1.03962e-11	9.86193e-11
1480	AT1G14755	10	6	3	12	8	4	AT1G14755	8.12498	7.39227	8.85768	1.19824	0.260912	0.758652	1
1481	AT1G14760	37	54	92	90	66	64	AT1G14760	68.299	63.261	73.3371	1.15928	0.213228	0.58789	0.872987
1482	AT1G14770	279	404	250	261	284	285	AT1G14770	293.257	311.715	274.798	0.88157	-0.181853	0.264144	0.483698
1483	AT1G14780	1100	1296	1162	193	182	179	AT1G14780	689.96	1196.38	183.543	0.153415	-2.70448	2.51004e-168	7.50419e-166
1484	AT1G14790	124	156	127	127	139	142	AT1G14790	136.511	137.424	135.599	0.986717	-0.0192912	0.90343	1
1485	AT1G14800	9	29	23	29	19	31	AT1G14800	24.156	21.3072	27.0049	1.26741	0.341882	0.433968	0.706851
1486	AT1G14810	1215	1368	1090	1786	1580	1463	AT1G14810	1411.97	1232.84	1591.1	1.2906	0.368039	2.15847e-05	0.000106171
1487	AT1G14820	480	550	373	394	309	344	AT1G14820	407.915	470.155	345.676	0.735238	-0.443716	0.00241809	0.00826775
1488	AT1G14830	2490	2745	2358	2597	2390	2351	AT1G14830	2484.99	2551.43	2418.56	0.947923	-0.0771576	0.211349	0.405298
1489	AT1G14840	195	225	179	261	228	179	AT1G14840	211.324	201.849	220.798	1.09388	0.129453	0.405514	0.671889
1490	AT1G14850	894	958	835	1505	1320	1172	AT1G14850	1110.43	904.01	1316.85	1.45667	0.542677	4.5472e-07	2.7794e-06
1491	AT1G14860	3206	3864	3024	3166	2942	2907	AT1G14860	3177.18	3383.03	2971.33	0.878303	-0.187209	0.0011808	0.00430513
1492	AT1G14870	10424	12670	10525	6596	6019	5950	AT1G14870	8696.89	11276.7	6117.11	0.542457	-0.882419	2.13192e-58	1.22365e-56
1493	AT1G14880	0	4	7	2	0	0	AT1G14880	3.18834	4.74285	1.63382	0.344481	-1.5375	0.242862	0.452985
1494	AT1G14890	153	219	161	90	69	67	AT1G14890	127.219	179.1	75.3371	0.420643	-1.24933	4.91732e-12	4.77277e-11
1495	AT1G14900	847	932	812	2033	1945	1831	AT1G14900	1393.3	871.54	1915.07	2.19734	1.13576	1.03391e-56	5.72881e-55
1496	AT1G14910	445	550	508	848	816	772	AT1G14910	654.884	506.062	803.706	1.58816	0.667354	8.49572e-14	9.44563e-13
1497	AT1G14920	1019	1450	989	2095	1922	1947	AT1G14920	1560.45	1154.84	1966.05	1.70244	0.767607	6.2011e-15	7.40919e-14
1498	AT1G14930	8896	10866	8881	6552	6353	6191	AT1G14930	7949.51	9604.42	6294.59	0.655385	-0.609585	3.97959e-31	1.05525e-29
1499	AT1G14940	568	660	570	402	361	323	AT1G14940	481.657	604.725	358.588	0.592977	-0.753952	6.24965e-14	6.99992e-13
1500	AT1G14950	478	551	439	442	384	293	AT1G14950	431.191	493.232	369.15	0.748431	-0.418059	0.00292808	0.00982019
1501	AT1G14960	127	153	147	157	124	107	AT1G14960	136.619	144.634	128.604	0.889166	-0.169475	0.343471	0.595
1502	AT1G14970	87	131	100	128	110	129	AT1G14970	114.607	107.293	121.921	1.13634	0.184394	0.348924	0.60144
1503	AT1G14980	2071	2604	2027	2549	2559	2412	AT1G14980	2362.59	2245.43	2479.75	1.10435	0.143204	0.0266315	0.0700442
1504	AT1G14990	264	328	270	303	222	270	AT1G14990	276.345	290.017	262.672	0.905712	-0.142876	0.252938	0.467248
1505	AT1G15000	187	174	137	331	331	262	AT1G15000	236.835	168.305	305.365	1.81436	0.859462	5.32497e-08	3.57266e-07
1506	AT1G15010	3364	3823	3136	4581	4368	4242	AT1G15010	3906.21	3464.58	4347.84	1.25494	0.327616	1.07812e-08	7.70458e-08
1507	AT1G15015	0	0	0	3	0	3	AT1G15015	1.98374	1.01126	2.95621	2.92329	1.54759	0.388957	0.65188
1508	AT1G15020	1072	1360	1080	1252	1187	1106	AT1G15020	1173.21	1177.48	1168.95	0.992756	-0.0104883	0.851026	1
1509	AT1G15030	585	676	568	692	639	623	AT1G15030	629.8	614.853	644.747	1.04862	0.0684911	0.45773	0.733824
1510	AT1G15040	63	74	64	69	52	47	AT1G15040	62.3651	68.4965	56.2337	0.820972	-0.284596	0.266139	0.486697
1511	AT1G15045	0	0	0	0	0	0	AT1G15045	1.00016	1.01126	0.989053	0.97804	-0.0320349	1	1
1512	AT1G15050	9	18	7	6	8	4	AT1G15050	9.56186	12.2003	6.92337	0.567473	-0.817376	0.208763	0.401243
1513	AT1G15060	337	384	322	421	397	427	AT1G15060	381.235	351.09	411.38	1.17172	0.228633	0.0383193	0.0965291
1514	AT1G15080	58	124	79	179	215	175	AT1G15080	138.173	87.6504	188.696	2.15283	1.10623	1.42956e-06	8.24692e-06
1515	AT1G15100	1014	1135	997	856	829	779	AT1G15100	935.482	1058.01	812.951	0.768376	-0.380115	1.5294e-06	8.79309e-06
1516	AT1G15110	594	708	577	682	677	734	AT1G15110	661.148	631.106	691.19	1.0952	0.131199	0.150987	0.308316
1517	AT1G15120	2803	3390	2751	2958	2927	2591	AT1G15120	2896.78	2999.62	2793.94	0.931431	-0.102479	0.109625	0.237135
1518	AT1G15125	21	60	42	55	32	36	AT1G15125	41.6125	41.8381	41.3869	0.989216	-0.0156427	0.968563	1
1519	AT1G15130	2536	3045	2519	2915	2546	2658	AT1G15130	2696.6	2717.8	2675.41	0.984404	-0.022678	0.689724	0.975242
1520	AT1G15140	813	875	777	821	641	623	AT1G15140	758.326	829.65	687.001	0.828061	-0.272191	0.0101238	0.0298793
1521	AT1G15150	1	4	4	5	3	2	AT1G15150	4.14461	4.02157	4.26765	1.06119	0.0856841	1	1
1522	AT1G15160	81	135	105	126	128	101	AT1G15160	113.094	108.244	117.943	1.0896	0.123801	0.553838	0.842447
1523	AT1G15165	66	72	60	89	88	62	AT1G15165	73.5846	67.4877	79.6814	1.18068	0.239618	0.305701	0.542667
1524	AT1G15170	1931	2489	1990	2453	2213	2227	AT1G15170	2210.02	2148.23	2271.8	1.05752	0.0806866	0.272553	0.495693
1525	AT1G15180	2005	2358	1982	3778	3676	3641	AT1G15180	2894.07	2130.18	3657.96	1.71721	0.780066	3.2935e-38	1.09405e-36
1526	AT1G15190	103	93	86	140	125	84	AT1G15190	105.905	96.0198	115.79	1.20589	0.270104	0.235037	0.441475
1527	AT1G15200	1500	1944	1514	2157	2053	1942	AT1G15200	1844.49	1660.94	2028.04	1.22102	0.288089	6.00167e-05	0.000275906
1528	AT1G15210	3611	4226	3392	2777	2478	2229	AT1G15210	3115.66	3766.07	2465.25	0.654596	-0.611324	5.97519e-16	7.65714e-15
1529	AT1G15215	77	74	77	127	149	143	AT1G15215	108.605	77.9454	139.265	1.7867	0.8373	1.3268e-05	6.72196e-05
1530	AT1G15220	126	172	133	266	233	268	AT1G15220	199.483	145.221	253.744	1.74729	0.805117	4.03349e-08	2.73996e-07
1531	AT1G15230	1201	1279	1066	1861	1625	1682	AT1G15230	1447.55	1191.81	1703.28	1.42916	0.515164	1.50939e-13	1.64852e-12
1532	AT1G15240	1239	1425	1239	1542	1526	1443	AT1G15240	1399.79	1311.8	1487.77	1.13415	0.181609	0.00992723	0.0293757
1533	AT1G15250	282	330	261	501	511	484	AT1G15250	393.91	293.649	494.171	1.68286	0.750919	6.42077e-12	6.19006e-11
1534	AT1G15260	79	80	64	106	107	132	AT1G15260	95.3547	75.8808	114.829	1.51328	0.597676	0.0036321	0.0119155
1535	AT1G15270	2889	3644	2947	2543	2480	2338	AT1G15270	2802.37	3177.92	2426.82	0.763649	-0.389019	2.51473e-09	1.90733e-08
1536	AT1G15280	1189	1293	1108	1677	1636	1651	AT1G15280	1422.12	1206.95	1637.3	1.35656	0.439949	3.46749e-10	2.88491e-09
1537	AT1G15290	606	727	598	976	954	809	AT1G15290	775.96	648.617	903.304	1.39266	0.477846	2.38345e-07	1.49929e-06
1538	AT1G15310	556	575	543	638	605	589	AT1G15310	584.615	564.56	604.671	1.07105	0.0990249	0.272436	0.495515
1539	AT1G15320	8	14	4	2	2	0	AT1G15320	5.92297	9.54544	2.30049	0.241004	-2.05287	0.0217067	0.0586273
1540	AT1G15330	1897	2283	1690	2958	2770	2930	AT1G15330	2410.22	1965.83	2854.61	1.45211	0.538153	4.27269e-17	5.94592e-16
1541	AT1G15340	3824	4771	3754	4615	4397	4173	AT1G15340	4241.56	4137.66	4345.47	1.05022	0.0706957	0.277551	0.503102
1542	AT1G15350	1336	1689	1369	1175	1172	1216	AT1G15350	1324.67	1473.55	1175.79	0.797933	-0.325661	3.67608e-06	2.01016e-05
1543	AT1G15360	0	0	0	0	0	0	AT1G15360	1.00016	1.01126	0.989053	0.97804	-0.0320349	1	1
1544	AT1G15370	960	1310	1119	1229	1098	1183	AT1G15370	1147.35	1137.16	1157.53	1.01792	0.025618	0.818208	1
1545	AT1G15380	14	10	10	3	8	6	AT1G15380	9.56319	12.5035	6.62288	0.529682	-0.916803	0.174382	0.346421
1546	AT1G15385	0	0	4	0	0	4	AT1G15385	2.37762	2.43286	2.32239	0.954592	-0.0670436	1	1
1547	AT1G15390	506	689	473	751	662	591	AT1G15390	609.326	557.884	660.768	1.18442	0.244177	0.0881114	0.197216
1548	AT1G15400	1729	2234	1748	1805	1610	1654	AT1G15400	1792.08	1913.26	1670.9	0.873323	-0.195413	0.0108476	0.0317674
1549	AT1G15410	1321	1690	1348	1864	1772	1768	AT1G15410	1621.57	1461.22	1781.92	1.21947	0.286254	3.00275e-05	0.000144589
1550	AT1G15415	134	153	126	154	197	163	AT1G15415	155.111	139.585	170.636	1.22246	0.289783	0.0788254	0.179654
1551	AT1G15420	507	577	471	629	563	587	AT1G15420	554.898	522.692	587.103	1.12323	0.167652	0.0794174	0.180776
1552	AT1G15430	1679	2107	1693	1183	1153	1053	AT1G15430	1477.34	1836.98	1117.7	0.608447	-0.716796	1.40779e-22	2.60192e-21
1553	AT1G15440	525	636	522	955	900	836	AT1G15440	726.453	565.372	887.534	1.56982	0.650602	5.5961e-14	6.29642e-13
1554	AT1G15460	9	9	4	0	0	0	AT1G15460	4.66233	8.3356	0.989053	0.118654	-3.07517	0.00626411	0.0194478
1555	AT1G15470	340	413	395	432	448	342	AT1G15470	395.34	387.086	403.593	1.04264	0.0602476	0.65483	0.942592
1556	AT1G15480	186	260	200	396	368	405	AT1G15480	301.706	217.091	386.321	1.77953	0.831495	1.20565e-11	1.13853e-10
1557	AT1G15490	239	298	236	423	412	442	AT1G15490	341.004	259.982	422.025	1.62328	0.698915	1.68631e-09	1.30557e-08
1558	AT1G15500	11789	14333	11651	25593	24117	23684	AT1G15500	18425.1	12664.8	24185.5	1.90967	0.933321	8.12113e-76	6.42277e-74
1559	AT1G15510	310	318	260	471	341	406	AT1G15510	350.526	299.22	401.833	1.34294	0.425391	0.00369134	0.0120894
1560	AT1G15520	37	72	46	94	84	63	AT1G15520	66.4015	52.5097	80.2933	1.52911	0.612696	0.0227475	0.0611349
1561	AT1G15530	299	354	350	316	333	269	AT1G15530	321.068	338.606	303.53	0.896411	-0.157768	0.196142	0.38165
1562	AT1G15540	1	0	0	0	0	0	AT1G15540	1.17261	1.35617	0.989053	0.729298	-0.455421	0.987682	1
1563	AT1G15550	25	31	30	18	21	31	AT1G15550	27.0304	29.9355	24.1253	0.805912	-0.311306	0.426568	0.698562
1564	AT1G15570	54	54	37	77	76	61	AT1G15570	60.5285	49.5775	71.4794	1.44177	0.527842	0.0401281	0.100296
1565	AT1G15580	0	2	0	0	0	2	AT1G15580	1.64444	1.63316	1.65572	1.01381	0.019793	1	1
1566	AT1G15590	0	0	0	0	0	0	AT1G15590	1.00016	1.01126	0.989053	0.97804	-0.0320349	1	1
1567	AT1G15600	0	0	0	0	0	0	AT1G15600	1.00016	1.01126	0.989053	0.97804	-0.0320349	1	1
1568	AT1G15610	0	0	0	0	0	0	AT1G15610	1.00016	1.01126	0.989053	0.97804	-0.0320349	1	1
1569	AT1G15620	0	0	0	0	0	0	AT1G15620	1.00016	1.01126	0.989053	0.97804	-0.0320349	1	1
1570	AT1G15630	0	0	0	0	0	0	AT1G15630	1.00016	1.01126	0.989053	0.97804	-0.0320349	1	1
1571	AT1G15640	0	0	0	0	0	0	AT1G15640	1.00016	1.01126	0.989053	0.97804	-0.0320349	1	1
1572	AT1G15660	461	621	465	506	448	434	AT1G15660	488.246	518.376	458.116	0.883754	-0.178284	0.0817402	0.18518
1573	AT1G15670	3119	3475	2875	2507	2359	2161	AT1G15670	2747.49	3179.11	2315.88	0.728467	-0.457065	3.58223e-14	4.07093e-13
1574	AT1G15680	0	0	0	0	0	0	AT1G15680	1.00016	1.01126	0.989053	0.97804	-0.0320349	1	1
1575	AT1G15690	30086	34127	27880	42480	39095	37887	AT1G15690	35127.5	30898.3	39356.6	1.27375	0.349078	1.49535e-12	1.50065e-11
1576	AT1G15700	108	136	104	172	115	124	AT1G15700	126.809	117.512	136.106	1.15823	0.211919	0.275758	0.500449
1577	AT1G15710	336	410	311	401	399	357	AT1G15710	368.593	354.92	382.266	1.07705	0.107083	0.35993	0.616098
1578	AT1G15720	45	35	59	79	96	89	AT1G15720	68.2541	48.3841	88.1242	1.82135	0.865007	0.000264853	0.00109531
1579	AT1G15730	487	492	362	679	583	554	AT1G15730	524.757	450.625	598.889	1.32902	0.410362	0.00129936	0.00469709
1580	AT1G15740	2372	2826	2213	2738	2294	2320	AT1G15740	2453.03	2484.38	2421.68	0.974762	-0.0368782	0.635408	0.922706
1581	AT1G15750	2168	2551	2133	3725	3374	3385	AT1G15750	2877.48	2300.08	3454.88	1.50207	0.586952	1.81643e-22	3.34582e-21
1582	AT1G15757	0	0	0	0	0	0	AT1G15757	1.00016	1.01126	0.989053	0.97804	-0.0320349	1	1
1583	AT1G15760	4	6	1	18	16	14	AT1G15760	10.702	4.612	16.792	3.64094	1.86431	0.00461541	0.0148477
1584	AT1G15770	0	0	0	0	0	2	AT1G15770	1.33349	1.01126	1.65572	1.63728	0.711304	0.84937	1
1585	AT1G15772	2	0	0	2	4	0	AT1G15772	2.33412	1.70108	2.96716	1.74428	0.802628	0.644984	0.933089
1586	AT1G15780	1992	2450	2025	2343	2043	2090	AT1G15780	2151.8	2169.58	2134.01	0.983601	-0.0238545	0.687065	0.973029
1587	AT1G15790	15	27	31	59	79	85	AT1G15790	50.1372	25.5979	74.6765	2.91729	1.54463	2.88083e-07	1.79802e-06
1588	AT1G15800	342	428	325	356	304	284	AT1G15800	339.66	367.562	311.758	0.848179	-0.237559	0.0357986	0.0909288
1589	AT1G15810	775	914	781	1029	1072	956	AT1G15810	919.408	830.092	1008.72	1.2152	0.281188	0.000430278	0.00171544
1590	AT1G15820	1986	2286	1881	1071	1027	965	AT1G15820	1537.8	2065.34	1010.26	0.489151	-1.03165	4.74999e-50	2.24354e-48
1591	AT1G15825	27	31	32	41	38	22	AT1G15825	32.7715	31.3361	34.2069	1.09161	0.126462	0.724747	1
1592	AT1G15830	57	41	46	45	42	39	AT1G15830	46.1325	49.7685	42.4964	0.853882	-0.227892	0.471997	0.750373
1593	AT1G15840	120	107	111	229	187	235	AT1G15840	165.302	115.122	215.482	1.87178	0.90441	1.01298e-08	7.25241e-08
1594	AT1G15850	0	2	0	0	0	0	AT1G15850	1.31111	1.63316	0.989053	0.605607	-0.723546	0.824525	1
1595	AT1G15860	1384	1744	1361	1041	958	900	AT1G15860	1230.14	1504.36	955.926	0.635436	-0.654182	8.64847e-16	1.09539e-14
1596	AT1G15870	110	185	115	85	61	70	AT1G15870	104.703	137.348	72.0585	0.524642	-0.930596	0.000496035	0.00195074
1597	AT1G15880	289	475	319	1195	1169	1089	AT1G15880	750.335	361.764	1138.91	3.1482	1.65453	1.64007e-61	1.0095e-59
1598	AT1G15885	1	0	0	86	75	87	AT1G15885	42.0352	1.35617	82.7142	60.991	5.93052	2.0606e-33	5.90113e-32
1599	AT1G15890	0	2	0	77	71	61	AT1G15890	35.723	1.63316	69.8128	42.7471	5.41775	5.76345e-27	1.29267e-25
1600	AT1G15900	18	53	27	15	27	10	AT1G15900	25.727	33.2958	18.1582	0.54536	-0.874719	0.135476	0.282411
1601	AT1G15910	593	660	603	315	411	346	AT1G15910	489.975	625.076	354.874	0.567729	-0.816725	2.79833e-16	3.67252e-15
1602	AT1G15920	1166	1447	1083	1549	1395	1295	AT1G15920	1317.53	1238.02	1397.03	1.12844	0.174331	0.0615084	0.14545
1603	AT1G15930	3983	4994	3982	8075	7388	7299	AT1G15930	5921.4	4342.87	7499.92	1.72695	0.788225	3.00251e-45	1.24903e-43
1604	AT1G15940	1215	1336	1228	1436	1398	1397	AT1G15940	1333.77	1271.94	1395.6	1.09723	0.13386	0.0574676	0.137074
1605	AT1G15950	5506	6173	5187	6917	6425	6613	AT1G15950	6119.99	5663.04	6576.93	1.16138	0.215838	6.68785e-05	0.000304926
1606	AT1G15960	1545	1810	1500	1857	1603	1737	AT1G15960	1671.4	1629.82	1712.99	1.05103	0.0718096	0.294619	0.52721
1607	AT1G15970	215	272	230	229	215	243	AT1G15970	234.485	241.487	227.482	0.942004	-0.0861942	0.514623	0.798551
1608	AT1G15980	32	107	52	57	72	66	AT1G15980	64.5829	63.8008	65.365	1.02452	0.0349456	1	1
1609	AT1G15990	0	4	0	0	2	0	AT1G15990	1.95539	2.25506	1.65572	0.734225	-0.445706	0.848764	1
1610	AT1G16000	525	521	435	735	679	709	AT1G16000	599.651	498.693	700.609	1.40489	0.490458	9.74045e-08	6.38243e-07
1611	AT1G16010	3474	4156	3466	2363	2110	2131	AT1G16010	2949.9	3723.35	2176.45	0.584541	-0.774623	2.70147e-38	9.01793e-37
1612	AT1G16020	281	320	268	291	299	297	AT1G16020	293.076	292.682	293.47	1.00269	0.00387824	0.998932	1
1613	AT1G16022	16	12	8	28	33	26	AT1G16022	21.3935	13.1044	29.6825	2.26508	1.17956	0.00709032	0.021696
1614	AT1G16025	13	7	4	16	23	16	AT1G16025	14.1203	9.09335	19.1472	2.10563	1.07425	0.0479757	0.117208
1615	AT1G16030	877	986	850	393	387	474	AT1G16030	663.435	912.184	414.687	0.454609	-1.1373	1.66889e-36	5.32284e-35
1616	AT1G16040	294	377	307	420	429	405	AT1G16040	371.571	328.751	414.391	1.2605	0.333999	0.00287214	0.00965518
1617	AT1G16060	35	50	44	48	37	31	AT1G16060	41.6992	44.2682	39.1302	0.883936	-0.177987	0.580382	0.867527
1618	AT1G16070	2	0	7	5	9	0	AT1G16070	4.89493	4.18888	5.60098	1.33711	0.419116	0.721283	1
1619	AT1G16080	612	786	581	736	662	764	AT1G16080	688.294	662.99	713.598	1.07633	0.106125	0.308608	0.547041
1620	AT1G16090	107	157	123	122	111	100	AT1G16090	120.552	130.45	110.653	0.848245	-0.237448	0.185903	0.365651
1621	AT1G16110	682	855	676	353	343	433	AT1G16110	557.905	742.352	373.458	0.503074	-0.991159	7.00105e-20	1.13986e-18
1622	AT1G16120	54	82	44	23	30	14	AT1G16120	41.9212	60.7719	23.0706	0.379626	-1.39735	6.85132e-05	0.000311805
1623	AT1G16130	1233	1603	1251	938	795	886	AT1G16130	1116.53	1369.34	863.72	0.630755	-0.664848	4.03873e-12	3.94251e-11
1624	AT1G16150	97	85	91	38	54	41	AT1G16150	69.073	93.2397	44.9064	0.481623	-1.05402	1.42629e-05	7.19253e-05
1625	AT1G16160	10	10	20	53	40	36	AT1G16160	29.0433	14.6779	43.4088	2.95744	1.56435	3.03108e-05	0.00014585
1626	AT1G16170	2342	2948	2362	2122	1907	1787	AT1G16170	2240.68	2564.93	1916.43	0.747166	-0.420499	1.16503e-07	7.56286e-07
1627	AT1G16180	13394	15504	12994	13720	12713	12508	AT1G16180	13445.4	14059.8	12831.1	0.912612	-0.131926	0.00877351	0.0262848
1628	AT1G16190	734	866	656	1283	1209	1166	AT1G16190	981.439	756.6	1206.28	1.59434	0.672958	1.19381e-17	1.70762e-16
1629	AT1G16210	4082	5039	4065	3524	3272	3170	AT1G16210	3852.46	4420.51	3284.41	0.742993	-0.428579	6.54892e-13	6.75654e-12
1630	AT1G16220	26	24	29	42	39	47	AT1G16220	35.4721	27.7483	43.1959	1.5567	0.638495	0.0528943	0.127575
1631	AT1G16225	0	0	0	0	0	0	AT1G16225	1.00016	1.01126	0.989053	0.97804	-0.0320349	1	1
1632	AT1G16230	0	0	0	0	0	0	AT1G16230	1.00016	1.01126	0.989053	0.97804	-0.0320349	1	1
1633	AT1G16240	1855	2107	1811	1727	1613	1602	AT1G16240	1784.52	1939.62	1629.42	0.84007	-0.251419	0.000137681	0.00059655
1634	AT1G16250	429	527	385	504	455	380	AT1G16250	445.741	449.677	441.805	0.982493	-0.0254807	0.822136	1
1635	AT1G16260	80	102	59	286	239	259	AT1G16260	170.24	81.2896	259.191	3.1885	1.67288	1.46122e-24	2.94475e-23
1636	AT1G16270	1110	1322	939	1477	1273	1254	AT1G16270	1224.07	1128.66	1319.49	1.16908	0.225368	0.033108	0.0848472
1637	AT1G16280	305	389	287	451	385	407	AT1G16280	369.777	329.168	410.385	1.24673	0.318154	0.00477949	0.015323
1638	AT1G16290	11	9	14	5	1	2	AT1G16290	8.0902	12.5794	3.60098	0.28626	-1.8046	0.018254	0.0504387
1639	AT1G16300	883	1038	792	818	806	704	AT1G16300	838.922	909.81	768.034	0.84417	-0.244395	0.002674	0.00905398
1640	AT1G16310	797	955	829	240	197	191	AT1G16310	537.592	867.488	207.695	0.239421	-2.06238	2.87665e-90	3.11801e-88
1641	AT1G16320	590	701	662	584	513	573	AT1G16320	604.511	657.759	551.262	0.838092	-0.254819	0.00574443	0.0180091
1642	AT1G16330	8	13	6	12	19	18	AT1G16330	13.5682	9.94529	17.191	1.72856	0.78957	0.168333	0.336271
1643	AT1G16340	86	108	107	174	158	183	AT1G16340	136.517	102.284	170.751	1.66938	0.739314	1.84114e-05	9.14221e-05
1644	AT1G16350	1053	1288	1072	1585	1649	1556	AT1G16350	1363	1145.69	1580.3	1.37934	0.463981	7.6882e-11	6.76691e-10
1645	AT1G16360	66	95	90	32	33	37	AT1G16360	59.9701	85.3015	34.6387	0.406074	-1.30019	6.25354e-07	3.76236e-06
1646	AT1G16370	253	291	276	10	6	12	AT1G16370	143.532	276.85	10.2129	0.0368897	-4.76064	3.57362e-91	3.92032e-89
1647	AT1G16380	0	2	0	0	0	0	AT1G16380	1.31111	1.63316	0.989053	0.605607	-0.723546	0.824525	1
1648	AT1G16390	50	57	58	28	26	26	AT1G16390	41.9716	56.5941	27.3492	0.483252	-1.04915	0.00071886	0.00274412
1649	AT1G16400	0	4	0	4	4	2	AT1G16400	3.26683	2.25506	4.2786	1.89733	0.923973	0.515275	0.799143
1650	AT1G16410	0	1	0	0	0	0	AT1G16410	1.15563	1.32221	0.989053	0.74803	-0.418832	0.987654	1
1651	AT1G16420	6	7	2	0	0	0	AT1G16420	3.47861	5.96817	0.989053	0.165721	-2.59317	0.0420251	0.104395
1652	AT1G16430	48	85	78	112	145	92	AT1G16430	93.9076	71.7188	116.096	1.61877	0.694898	0.0195658	0.0535627
1653	AT1G16440	8	0	4	2	2	4	AT1G16440	4.41299	5.19215	3.63382	0.699869	-0.514843	0.69712	0.982331
1654	AT1G16445	83	85	62	69	52	68	AT1G16445	70.669	78.1044	63.2337	0.809605	-0.30471	0.196871	0.382686
1655	AT1G16460	241	295	260	552	428	425	AT1G16460	365.774	268.269	463.279	1.72692	0.788203	8.32494e-08	5.49329e-07
1656	AT1G16470	1733	2243	1771	2054	1889	1893	AT1G16470	1924.73	1925.61	1923.84	0.999077	-0.00133267	0.939999	1
1657	AT1G16480	45	55	72	114	64	72	AT1G16480	71.1488	59.2232	83.0744	1.40273	0.48824	0.154327	0.313635
1658	AT1G16490	24	46	23	47	56	41	AT1G16490	40.1208	31.767	48.4745	1.52594	0.609698	0.0615756	0.14557
1659	AT1G16500	703	911	701	462	420	391	AT1G16500	598.079	775.894	420.265	0.541652	-0.884561	1.04825e-18	1.59322e-17
1660	AT1G16510	26	30	37	4	18	7	AT1G16510	21.5346	32.4572	10.6119	0.326951	-1.61285	0.00028391	0.00116801
1661	AT1G16515	33	45	28	32	31	37	AT1G16515	35.1547	36.3372	33.9721	0.934911	-0.0970997	0.768692	1
1662	AT1G16520	389	498	382	507	489	418	AT1G16520	446.285	425.797	466.772	1.09623	0.132552	0.214604	0.410535
1663	AT1G16530	0	0	2	2	0	0	AT1G16530	1.67794	1.72206	1.63382	0.948762	-0.0758812	1	1
1664	AT1G16540	481	468	442	587	563	522	AT1G16540	510.71	469.524	551.896	1.17544	0.233197	0.0151026	0.0426446
1665	AT1G16560	1147	1404	1208	1428	1385	1333	AT1G16560	1314.94	1262.52	1367.36	1.08304	0.115083	0.112026	0.241503
1666	AT1G16570	317	342	349	521	490	480	AT1G16570	416.506	340.727	492.285	1.44481	0.530878	4.25781e-07	2.61014e-06
1667	AT1G16590	140	174	155	200	207	193	AT1G16590	178.645	158.491	198.8	1.25433	0.326914	0.0324351	0.0833344
1668	AT1G16610	744	817	685	1165	1021	922	AT1G16610	889.677	755.119	1024.24	1.35639	0.43977	7.48187e-06	3.93109e-05
1669	AT1G16630	31	44	33	29	49	63	AT1G16630	42.3925	37.1135	47.6716	1.28448	0.361187	0.348959	0.601444
1670	AT1G16640	104	63	65	117	119	114	AT1G16640	97.9738	79.5728	116.375	1.4625	0.548432	0.0126058	0.0363529
1671	AT1G16650	246	242	216	212	223	231	AT1G16650	229.272	237.875	220.668	0.927663	-0.108328	0.435323	0.708324
1672	AT1G16670	3896	4698	3893	3418	3126	3061	AT1G16670	3677.22	4189.2	3165.24	0.755572	-0.40436	1.67372e-12	1.67408e-11
1673	AT1G16680	453	445	302	693	619	616	AT1G16680	519.514	402.959	636.069	1.5785	0.65855	4.4965e-07	2.75026e-06
1674	AT1G16690	131	166	157	190	173	146	AT1G16690	161.093	153.61	168.576	1.09743	0.134125	0.398721	0.664152
1675	AT1G16700	1391	1702	1371	1324	1241	1144	AT1G16700	1360.05	1497.27	1222.83	0.816704	-0.292114	3.0845e-05	0.000148108
1676	AT1G16705	0	0	1	0	0	6	AT1G16705	2.17786	1.36666	2.98905	2.18712	1.12903	0.534633	0.821161
1677	AT1G16710	1251	1483	1108	1495	1459	1357	AT1G16710	1354.52	1287.42	1421.62	1.10425	0.143061	0.0520884	0.12593
1678	AT1G16720	1984	2300	1847	2685	2615	2366	AT1G16720	2291.92	2056.92	2526.93	1.2285	0.296898	2.46888e-06	1.3832e-05
1679	AT1G16730	1974	2361	1823	4687	4373	4315	AT1G16730	3235.96	2063.91	4408.01	2.13576	1.09475	5.23467e-75	4.05739e-73
1680	AT1G16740	1510	1922	1468	1737	1641	1562	AT1G16740	1634.92	1641.2	1628.64	0.992348	-0.0110818	0.83214	1
1681	AT1G16750	241	257	269	501	411	377	AT1G16750	342.411	259.651	425.171	1.63747	0.711468	1.27794e-06	7.42898e-06
1682	AT1G16760	0	0	0	0	0	0	AT1G16760	1.00016	1.01126	0.989053	0.97804	-0.0320349	1	1
1683	AT1G16770	34	67	30	89	90	62	AT1G16770	62.2909	44.2338	80.3481	1.81644	0.861113	0.00671988	0.0207045
1684	AT1G16780	154	186	158	258	216	199	AT1G16780	195.308	168.117	222.498	1.32347	0.404324	0.00563387	0.0177033
1685	AT1G16790	490	564	540	481	511	480	AT1G16790	511.849	537.309	486.39	0.905233	-0.143638	0.145419	0.299537
1686	AT1G16800	172	204	161	295	259	260	AT1G16800	225.041	180.989	269.093	1.48679	0.572202	3.36272e-05	0.000160446
1687	AT1G16810	1701	2147	1708	2255	2045	2022	AT1G16810	1972.99	1862.34	2083.64	1.11883	0.16199	0.0141453	0.0402674
1688	AT1G16820	99	87	69	150	103	86	AT1G16820	99.5398	86.7326	112.347	1.29532	0.373314	0.18919	0.37107
1689	AT1G16825	146	177	144	121	160	115	AT1G16825	144.624	157.584	131.664	0.83552	-0.259254	0.116463	0.249113
1690	AT1G16830	81	96	42	80	81	67	AT1G16830	74.9201	73.727	76.1133	1.03237	0.0459548	0.934673	1
1691	AT1G16840	1356	1757	1382	1990	1863	1895	AT1G16840	1700.71	1506.21	1895.2	1.25826	0.331429	1.01022e-06	5.9335e-06
1692	AT1G16850	372	473	408	487	519	491	AT1G16850	458.029	421.4	494.658	1.17384	0.231239	0.0248857	0.066072
1693	AT1G16858	960	1002	844	1134	1009	968	AT1G16858	984.615	943.654	1025.57	1.08681	0.120102	0.119829	0.255011
1694	AT1G16860	960	1002	844	1134	1009	968	AT1G16860	984.615	943.654	1025.57	1.08681	0.120102	0.119829	0.255011
1695	AT1G16870	653	828	600	885	786	747	AT1G16870	747.122	696.944	797.301	1.144	0.194081	0.055769	0.133467
1696	AT1G16880	552	697	522	432	464	423	AT1G16880	514.789	593.652	435.926	0.734312	-0.445534	3.43547e-06	1.88515e-05
1697	AT1G16890	2932	3508	2961	2975	2660	2799	AT1G16890	2967.6	3155.44	2779.75	0.88094	-0.182884	0.00196008	0.00684544
1698	AT1G16900	799	915	658	941	872	871	AT1G16900	840.161	794.967	885.354	1.1137	0.15536	0.0725924	0.167369
1699	AT1G16905	0	0	2	0	2	0	AT1G16905	1.68889	1.72206	1.65572	0.961477	-0.056676	1	1
1700	AT1G16910	0	0	2	0	0	0	AT1G16910	1.35556	1.72206	0.989053	0.574343	-0.800015	0.822685	1
1701	AT1G16916	142	147	149	196	195	157	AT1G16916	165.081	148.653	181.51	1.22103	0.288103	0.0631695	0.148731
1702	AT1G16920	483	538	439	812	761	860	AT1G16920	647.007	490.915	803.1	1.63593	0.710107	3.58663e-15	4.36004e-14
1703	AT1G16930	383	429	387	419	390	356	AT1G16930	394.392	404.049	384.735	0.9522	-0.0706641	0.527646	0.812954
1704	AT1G16940	0	0	0	0	0	0	AT1G16940	1.00016	1.01126	0.989053	0.97804	-0.0320349	1	1
1705	AT1G16950	0	0	0	0	0	0	AT1G16950	1.00016	1.01126	0.989053	0.97804	-0.0320349	1	1
1706	AT1G16960	67	69	50	9	13	11	AT1G16960	37.6182	63.3458	11.8905	0.187708	-2.41344	7.62695e-12	7.30887e-11
1707	AT1G16970	361	403	328	352	310	334	AT1G16970	348.272	367.408	329.136	0.895832	-0.158701	0.160248	0.323396
1708	AT1G16980	0	0	0	0	0	0	AT1G16980	1.00016	1.01126	0.989053	0.97804	-0.0320349	1	1
1709	AT1G17000	0	0	0	0	0	0	AT1G17000	1.00016	1.01126	0.989053	0.97804	-0.0320349	1	1
1710	AT1G17010	2456	3073	2452	2703	2497	2441	AT1G17010	2596.75	2675.1	2518.4	0.941422	-0.0870865	0.143249	0.295895
1711	AT1G17020	28426	34137	27552	16287	14961	14625	AT1G17020	22663	30212.3	15113.7	0.500249	-0.99928	1.32651e-69	9.3013e-68
1712	AT1G17030	50	38	44	2	3	0	AT1G17030	24.1721	45.7105	2.63382	0.0576197	-4.11729	4.68448e-15	5.65923e-14
1713	AT1G17040	155	189	130	180	159	128	AT1G17040	157.065	159.444	154.685	0.970154	-0.0437136	0.773387	1
1714	AT1G17050	1069	1198	913	1222	1112	1170	AT1G17050	1111.16	1066.72	1155.61	1.08333	0.115477	0.134843	0.281286
1715	AT1G17060	2723	3324	2837	1943	1683	1737	AT1G17060	2374.73	2982.07	1767.38	0.592671	-0.754697	4.29158e-33	1.21495e-31
1716	AT1G17070	505	579	454	534	476	501	AT1G17070	507.696	516.582	498.81	0.965596	-0.0505089	0.591417	0.875984
1717	AT1G17080	1645	2081	1798	1657	1545	1543	AT1G17080	1709.5	1854.48	1564.52	0.843639	-0.245302	0.00021564	0.000905076
1718	AT1G17090	172	173	167	350	293	304	AT1G17090	243.153	173.482	312.824	1.80321	0.850566	1.54321e-10	1.32159e-09
1719	AT1G17100	1059	1276	995	1343	1254	1170	AT1G17100	1179.31	1116.67	1241.95	1.1122	0.153413	0.0416258	0.103555
1720	AT1G17110	2060	2382	2047	2748	2530	2214	AT1G17110	2323.98	2179.71	2468.24	1.13237	0.179344	0.0318664	0.0820826
1721	AT1G17120	928	1105	814	1152	1024	949	AT1G17120	992.014	953.983	1030.04	1.07973	0.110671	0.27735	0.502804
1722	AT1G17130	957	1259	1129	1290	1190	1291	AT1G17130	1183.84	1123.82	1243.87	1.10682	0.146418	0.103932	0.227097
1723	AT1G17140	97	117	117	141	93	104	AT1G17140	112.271	112.43	112.112	0.997169	-0.00409052	1	1
1724	AT1G17145	473	568	514	762	722	716	AT1G17145	624.715	523.449	725.98	1.38692	0.471882	1.94391e-07	1.23191e-06
1725	AT1G17147	804	866	733	390	379	367	AT1G17147	591.748	808.11	375.386	0.464524	-1.10618	5.18867e-32	1.42301e-30
1726	AT1G17150	1	0	0	0	1	0	AT1G17150	1.33928	1.35617	1.32239	0.975087	-0.0363964	1	1
1727	AT1G17160	826	935	737	1008	856	992	AT1G17160	890.265	838.575	941.954	1.12328	0.167717	0.0431527	0.106796
1728	AT1G17170	11358	14117	11335	6086	5600	5323	AT1G17170	8970.33	12336.6	5604.03	0.454259	-1.13841	9.14939e-53	4.63535e-51
1729	AT1G17180	1313	1615	1235	1482	1402	1300	AT1G17180	1387.21	1394.98	1379.43	0.988853	-0.0161718	0.78317	1
1730	AT1G17190	207	281	239	390	285	293	AT1G17190	282.056	244.725	319.386	1.30508	0.38414	0.0241835	0.0644214
1731	AT1G17200	445	555	461	817	668	686	AT1G17200	603.312	490.913	715.712	1.45792	0.543912	5.63393e-08	3.76915e-07
1732	AT1G17210	3279	3847	3065	5005	4624	4445	AT1G17210	4027.51	3417.5	4637.53	1.357	0.440417	1.27031e-14	1.48709e-13
1733	AT1G17220	2651	3174	2592	2877	2560	2489	AT1G17220	2717.51	2823.52	2611.49	0.924907	-0.11262	0.0585534	0.139346
1734	AT1G17230	1059	1164	939	781	617	580	AT1G17230	856.855	1061.94	651.772	0.613758	-0.704259	1.28225e-11	1.20818e-10
1735	AT1G17235	6	0	1	2	4	4	AT1G17235	3.86831	3.43613	4.30049	1.25155	0.323718	0.821919	1
1736	AT1G17240	11	25	18	248	228	243	AT1G17240	128.458	18.9762	237.941	12.5389	3.64834	8.58998e-62	5.32344e-60
1737	AT1G17250	121	110	93	199	130	172	AT1G17250	137.906	110.002	165.811	1.50734	0.592004	0.00516861	0.0164157
1738	AT1G17260	7	15	5	49	23	50	AT1G17260	25.4931	9.86688	41.1193	4.16741	2.05915	0.000230626	0.000963071
1739	AT1G17270	189	227	199	280	233	301	AT1G17270	238.383	207.509	269.257	1.29757	0.375807	0.00503261	0.01604
1740	AT1G17280	884	1126	972	968	898	954	AT1G17280	965.941	1001.49	930.392	0.929008	-0.106238	0.167093	0.334357
1741	AT1G17285	8	7	10	29	17	21	AT1G17285	16.253	9.50119	23.0049	2.42127	1.27576	0.0107355	0.0314629
1742	AT1G17290	6296	7939	6287	5675	5100	4812	AT1G17290	6005.06	6875.6	5134.53	0.746776	-0.421253	1.40632e-07	9.05568e-07
1743	AT1G17300	0	0	1	1	1	0	AT1G17300	1.50572	1.36666	1.64477	1.2035	0.267234	1	1
1744	AT1G17310	2	0	0	2	6	1	AT1G17310	2.83412	1.70108	3.96716	2.33214	1.22165	0.384671	0.647048
1745	AT1G17330	361	419	345	403	369	356	AT1G17330	375.501	378.425	372.577	0.984548	-0.0224672	0.836706	1
1746	AT1G17340	903	1097	776	1109	975	871	AT1G17340	951.608	929.368	973.848	1.04786	0.0674478	0.615871	0.90238
1747	AT1G17345	149	210	186	105	101	84	AT1G17345	140.156	183.807	96.5062	0.525042	-0.929495	5.79116e-08	3.86636e-07
1748	AT1G17350	169	266	157	191	161	212	AT1G17350	192.355	197.812	186.898	0.944829	-0.0818745	0.670162	0.95818
1749	AT1G17360	740	863	749	577	498	567	AT1G17360	666.397	790.789	542.006	0.685399	-0.544985	7.8162e-10	6.2617e-09
1750	AT1G17370	1020	1239	935	1473	1410	1416	AT1G17370	1244.12	1070.39	1417.86	1.32463	0.405588	3.41097e-08	2.33163e-07
1751	AT1G17380	360	449	316	162	183	206	AT1G17380	279.992	377.102	182.882	0.484968	-1.04404	4.20607e-13	4.41986e-12
1752	AT1G17400	0	0	0	0	0	2	AT1G17400	1.33349	1.01126	1.65572	1.63728	0.711304	0.84937	1
1753	AT1G17410	113	106	86	172	139	118	AT1G17410	122.809	103.511	142.106	1.37286	0.457181	0.0148915	0.0421185
1754	AT1G17420	6817	7966	6585	6884	6247	6316	AT1G17420	6788.78	7169.6	6407.96	0.893768	-0.162027	0.0021645	0.00748633
1755	AT1G17430	46	68	49	125	142	104	AT1G17430	89.3618	55.4363	123.287	2.22394	1.15312	9.08144e-08	5.96498e-07
1756	AT1G17440	854	932	836	1350	1327	1286	AT1G17440	1094.85	882.484	1307.21	1.48128	0.566849	5.55309e-14	6.2532e-13
1757	AT1G17450	875	970	804	1022	931	876	AT1G17450	911.486	890.171	932.801	1.04789	0.067487	0.401908	0.667663
1758	AT1G17455	183	194	154	243	210	216	AT1G17455	200.257	179.186	221.329	1.23519	0.304736	0.0355262	0.090338
1759	AT1G17460	303	364	268	409	395	488	AT1G17460	370.565	313.952	427.178	1.36065	0.444294	0.00124898	0.00453244
1760	AT1G17470	1652	2085	1539	2589	2391	2250	AT1G17470	2074.37	1766.09	2382.65	1.34911	0.432003	2.12298e-07	1.34164e-06
1761	AT1G17480	22	37	31	9	10	21	AT1G17480	22.6728	31.1218	14.2239	0.457038	-1.12961	0.00708077	0.0216848
1762	AT1G17490	1069	1206	1017	970	927	855	AT1G17490	1006.94	1106.17	907.703	0.820584	-0.285277	0.000211326	0.000888613
1763	AT1G17500	2823	3411	2828	2098	1860	1803	AT1G17500	2469.38	3040.41	1898.35	0.624374	-0.679518	3.64017e-28	8.59673e-27
1764	AT1G17510	337	507	352	583	462	568	AT1G17510	466.136	399.998	532.273	1.33069	0.412174	0.0115704	0.0336559
1765	AT1G17520	464	654	482	600	617	509	AT1G17520	552.734	535.713	569.754	1.06354	0.0888773	0.538881	0.82582
1766	AT1G17530	986	1134	897	1208	1204	1186	AT1G17530	1099.8	1012.5	1187.1	1.17244	0.229512	0.00261506	0.00888097
1767	AT1G17540	107	134	79	5	5	6	AT1G17540	56.9641	107.661	6.26765	0.0582168	-4.10242	3.45434e-26	7.50629e-25
1768	AT1G17545	0	1	0	0	0	0	AT1G17545	1.15563	1.32221	0.989053	0.74803	-0.418832	0.987654	1
1769	AT1G17550	2481	3294	2592	3715	3487	3445	AT1G17550	3155.76	2802.2	3509.32	1.25234	0.324632	5.53944e-06	2.95966e-05
1770	AT1G17560	134	126	103	96	104	129	AT1G17560	116.31	123.015	109.605	0.890986	-0.166525	0.371034	0.629402
1771	AT1G17580	885	1042	830	1058	946	955	AT1G17580	950.494	925.248	975.74	1.05457	0.0766559	0.346713	0.598824
1772	AT1G17590	148	137	124	98	108	86	AT1G17590	117.989	138.728	97.2495	0.70101	-0.512493	0.00577765	0.0180966
1773	AT1G17600	15	11	18	51	27	26	AT1G17600	25.55	16.0026	35.0974	2.19324	1.13306	0.0149021	0.0421442
1774	AT1G17610	2	10	2	4	2	4	AT1G17610	4.89999	5.52138	4.2786	0.774915	-0.36789	0.716399	0.999095
1775	AT1G17615	0	0	0	0	0	0	AT1G17615	1.00016	1.01126	0.989053	0.97804	-0.0320349	1	1
1776	AT1G17620	2549	2982	2342	3679	3241	3386	AT1G17620	3017.92	2639.79	3396.05	1.28649	0.363435	1.25609e-09	9.85389e-09
1777	AT1G17630	84	86	81	73	82	69	AT1G17630	80.1847	85.5128	74.8566	0.875384	-0.192012	0.400898	0.666674
1778	AT1G17640	148	191	101	238	236	206	AT1G17640	186.198	147.345	225.05	1.52737	0.611051	0.000731512	0.00278694
1779	AT1G17650	343	439	366	837	748	671	AT1G17650	564.862	385.899	743.826	1.92752	0.946743	3.02879e-17	4.24968e-16
1780	AT1G17665	291	386	302	203	234	229	AT1G17665	274.752	328.738	220.767	0.671559	-0.574413	3.84171e-06	2.09622e-05
1781	AT1G17680	844	1054	843	903	846	813	AT1G17680	882.281	919.459	845.104	0.919132	-0.121657	0.120654	0.25649
1782	AT1G17690	370	447	393	583	493	515	AT1G17690	466.117	407.295	524.94	1.28885	0.366079	0.000291053	0.00119469
1783	AT1G17700	0	6	2	1	1	4	AT1G17700	3.28293	3.58775	2.97811	0.830075	-0.268687	0.872445	1
1784	AT1G17710	1076	1299	988	370	291	332	AT1G17710	727.566	1127.19	327.938	0.290934	-1.78124	7.42291e-66	4.92555e-64
1785	AT1G17720	3422	3892	3067	3113	2931	2950	AT1G17720	3223.22	3481.52	2964.91	0.851613	-0.23173	6.41102e-05	0.00029314
1786	AT1G17730	980	1166	921	708	728	773	AT1G17730	879.243	1028.91	729.572	0.709069	-0.496001	5.50333e-10	4.4747e-09
1787	AT1G17744	502	585	517	114	156	122	AT1G17744	335.106	539.804	130.408	0.241584	-2.04941	6.53339e-62	4.05816e-60
1788	AT1G17745	1771	2048	1664	547	528	509	AT1G17745	1181.53	1840.06	523.001	0.284231	-1.81487	1.63718e-122	3.1815e-120
1789	AT1G17750	46	58	41	53	34	45	AT1G17750	46.9462	49.4836	44.4088	0.897445	-0.156104	0.595579	0.879803
1790	AT1G17760	349	313	283	544	440	415	AT1G17760	390.329	319.29	461.367	1.44498	0.531045	0.000315089	0.00128471
1791	AT1G17770	0	0	0	0	0	0	AT1G17770	1.00016	1.01126	0.989053	0.97804	-0.0320349	1	1
1792	AT1G17780	597	667	476	522	437	480	AT1G17780	529.219	583.497	474.941	0.813957	-0.296976	0.00950747	0.0282812
1793	AT1G17790	184	297	243	317	271	259	AT1G17790	261.52	243.189	279.852	1.15076	0.202587	0.237287	0.444756
1794	AT1G17800	0	0	0	0	0	0	AT1G17800	1.00016	1.01126	0.989053	0.97804	-0.0320349	1	1
1795	AT1G17810	475	599	504	862	824	736	AT1G17810	664.555	530.224	798.886	1.50669	0.591387	3.31699e-11	3.02116e-10
1796	AT1G17820	434	491	394	610	609	525	AT1G17820	509.525	443.406	575.644	1.29823	0.376549	0.000127027	0.000553562
1797	AT1G17830	386	476	340	346	305	254	AT1G17830	350.931	402.995	298.868	0.741617	-0.431253	0.0015503	0.00551918
1798	AT1G17840	2016	2193	1782	1706	1699	1562	AT1G17840	1824.78	2011.59	1637.98	0.814273	-0.296416	5.77756e-06	3.07924e-05
1799	AT1G17850	466	532	371	612	541	521	AT1G17850	505.654	459.018	552.289	1.2032	0.266873	0.0159337	0.044699
1800	AT1G17860	8279	10089	8383	9296	8575	8255	AT1G17860	8790.45	8973.01	8607.89	0.959309	-0.0599332	0.246376	0.45788
1801	AT1G17870	64	71	58	571	554	530	AT1G17870	306.09	65.7762	546.405	8.30703	3.05433	5.68517e-106	8.27116e-104
1802	AT1G17880	1889	2334	1827	4557	4309	4065	AT1G17880	3144.53	2027.62	4261.43	2.10169	1.07155	2.36834e-71	1.69561e-69
1803	AT1G17890	1543	1775	1352	2041	1911	2096	AT1G17890	1780.14	1565.64	1994.65	1.27401	0.349376	4.12447e-07	2.53411e-06
1804	AT1G17910	0	0	0	0	0	0	AT1G17910	1.00016	1.01126	0.989053	0.97804	-0.0320349	1	1
1805	AT1G17920	67	69	65	138	119	165	AT1G17920	104.411	68.6768	140.145	2.04065	1.02903	1.90998e-07	1.21182e-06
1806	AT1G17930	397	543	427	478	410	415	AT1G17930	444.316	458.542	430.09	0.93795	-0.0924172	0.361408	0.618045
1807	AT1G17940	98	115	99	136	119	112	AT1G17940	113.795	105.756	121.834	1.15202	0.204168	0.280234	0.506986
1808	AT1G17950	0	0	0	0	3	1	AT1G17950	1.66682	1.01126	2.32239	2.29653	1.19945	0.582727	0.86917
1809	AT1G17960	16	17	15	13	13	15	AT1G17960	15.8302	17.147	14.5134	0.846412	-0.240568	0.66443	0.952546
1810	AT1G17970	116	118	98	152	127	175	AT1G17970	131.6	112.542	150.658	1.33868	0.420816	0.0165395	0.04617
1811	AT1G17980	2561	3087	2431	2476	2142	2010	AT1G17980	2445.71	2708.21	2183.22	0.806149	-0.310882	0.000212965	0.00089454
1812	AT1G17990	4897	6022	4858	1679	1483	1475	AT1G17990	3408.69	5289.11	1528.27	0.288948	-1.79112	1.26879e-120	2.3806e-118
1813	AT1G18000	701	853	735	315	291	279	AT1G18000	530.897	769.252	292.541	0.380292	-1.39482	4.07733e-45	1.69356e-43
1814	AT1G18010	653	809	653	290	297	259	AT1G18010	494.843	709.872	279.814	0.394176	-1.34309	3.41592e-40	1.2085e-38
1815	AT1G18020	4471	5178	4178	1431	1315	1326	AT1G18020	2990.36	4638.06	1342.66	0.289486	-1.78843	4.78987e-184	1.69238e-181
1816	AT1G18030	751	834	667	335	385	309	AT1G18030	548.372	756.423	340.322	0.449909	-1.15229	7.97462e-33	2.2413e-31
1817	AT1G18040	125	164	129	130	145	118	AT1G18040	135.767	140.967	130.566	0.926213	-0.110583	0.509949	0.793507
1818	AT1G18050	2	0	0	0	0	0	AT1G18050	1.34507	1.70108	0.989053	0.581425	-0.782334	0.823113	1
1819	AT1G18060	180	244	180	347	287	284	AT1G18060	253.065	202.939	303.19	1.494	0.579179	1.08928e-05	5.59574e-05
1820	AT1G18070	3076	3542	2811	3599	3040	2930	AT1G18070	3156.81	3162.37	3151.26	0.996486	-0.00507872	0.942399	1
1821	AT1G18080	7192	8531	6917	12396	12053	11468	AT1G18080	9715.12	7592.62	11837.6	1.5591	0.640709	1.38944e-34	4.15854e-33
1822	AT1G18090	261	340	256	361	367	331	AT1G18090	318.888	287.738	350.037	1.21651	0.282751	0.0189965	0.0522038
1823	AT1G18100	175	257	176	283	288	249	AT1G18100	237.53	203.835	271.224	1.33061	0.412084	0.00267314	0.00905222
1824	AT1G18130	0	0	0	0	0	0	AT1G18130	1.00016	1.01126	0.989053	0.97804	-0.0320349	1	1
1825	AT1G18140	4	5	2	7	2	8	AT1G18140	5.61777	4.65645	6.57909	1.4129	0.498657	0.625801	0.912555
1826	AT1G18150	900	1125	788	898	766	712	AT1G18150	862.231	941.304	783.158	0.831993	-0.265357	0.0336901	0.0862333
1827	AT1G18160	1372	1511	1186	1383	1285	1378	AT1G18160	1350.05	1365.58	1334.52	0.977253	-0.0331955	0.615644	0.902135
1828	AT1G18170	208	261	209	254	253	232	AT1G18170	236.365	228.189	244.542	1.07166	0.099851	0.479877	0.758866
1829	AT1G18180	44	75	53	43	52	31	AT1G18180	50.4315	58.3447	42.5183	0.728743	-0.456518	0.0947799	0.210171
1830	AT1G18190	547	663	586	707	668	700	AT1G18190	644.509	604.101	684.916	1.13378	0.181137	0.0441988	0.109167
1831	AT1G18200	44	49	51	148	109	116	AT1G18200	86.6257	49.5492	123.702	2.49655	1.31994	1.38595e-09	1.0832e-08
1832	AT1G18210	7714	9288	7461	7233	7003	7052	AT1G18210	7609.6	8201.39	7017.81	0.855685	-0.224848	1.54234e-05	7.73187e-05
1833	AT1G18220	6	3	4	3	6	4	AT1G18220	5.36236	5.43517	5.28954	0.973206	-0.0391829	1	1
1834	AT1G18250	262	380	279	404	366	334	AT1G18250	336.631	308.695	364.566	1.18099	0.239998	0.0679104	0.158309
1835	AT1G18260	2018	2363	1795	2398	2331	2336	AT1G18260	2199.75	2069.76	2329.74	1.12561	0.170705	0.00835915	0.0251709
1836	AT1G18265	82	85	69	196	216	219	AT1G18265	144.712	80.2472	209.177	2.60665	1.3822	1.23749e-15	1.55148e-14
1837	AT1G18270	2193	2622	2140	1905	1547	1635	AT1G18270	2004.53	2333.27	1675.8	0.718221	-0.4775	2.26873e-10	1.918e-09
1838	AT1G18280	2	5	0	4	3	2	AT1G18280	3.60055	3.25583	3.94526	1.21175	0.277096	0.920027	1
1839	AT1G18290	204	281	183	138	132	133	AT1G18290	178.8	223.788	133.812	0.597939	-0.741929	5.11115e-06	2.74268e-05
1840	AT1G18300	14717	17693	14265	18233	17091	16693	AT1G18300	16394.4	15648.5	17140.4	1.09534	0.131378	0.0105352	0.0309393
1841	AT1G18310	0	0	0	3	0	0	AT1G18310	1.48374	1.01126	1.95621	1.93443	0.951907	0.707606	0.989969
1842	AT1G18320	55	53	49	92	77	47	AT1G18320	62.9291	53.8763	71.9819	1.33606	0.417984	0.153024	0.311545
1843	AT1G18330	208	292	179	293	240	227	AT1G18330	239.141	227.167	251.115	1.10542	0.144597	0.458867	0.734739
1844	AT1G18335	133	150	133	130	171	121	AT1G18335	140.514	140.795	140.233	0.996005	-0.00577468	0.982259	1
1845	AT1G18340	127	165	167	208	220	198	AT1G18340	181.426	155.473	207.379	1.33385	0.4156	0.00574213	0.0180081
1846	AT1G18350	0	4	1	0	0	1	AT1G18350	1.96642	2.61046	1.32239	0.506573	-0.981159	0.591254	0.875934
1847	AT1G18360	147	188	185	203	225	237	AT1G18360	198.177	175.921	220.433	1.25303	0.325418	0.0251048	0.0666017
1848	AT1G18370	59	51	50	60	51	50	AT1G18370	54.4941	54.9894	53.9989	0.981987	-0.0262247	0.96963	1
1849	AT1G18390	2308	2741	2222	1517	1535	1449	AT1G18390	1961.9	2439.08	1484.72	0.60872	-0.716149	1.83732e-28	4.38474e-27
1850	AT1G18400	4	5	2	2	2	1	AT1G18400	3.64514	4.65645	2.63382	0.565629	-0.822072	0.499162	0.78083
1851	AT1G18410	1	0	0	1	4	0	AT1G18410	2.00047	1.35617	2.64477	1.95017	0.963604	0.617287	0.903628
1852	AT1G18420	30	56	23	53	40	44	AT1G18420	41.5107	36.946	46.0755	1.24711	0.318584	0.365024	0.621922
1853	AT1G18440	123	176	138	217	196	208	AT1G18440	176.411	147.208	205.613	1.39676	0.482083	0.00185731	0.00651665
1854	AT1G18450	470	579	579	819	743	759	AT1G18450	657.313	548.935	765.69	1.39486	0.480123	7.60485e-08	5.03552e-07
1855	AT1G18460	2007	2468	1847	4485	3900	3874	AT1G18460	3077.66	2117.09	4038.22	1.90744	0.931635	1.26596e-27	2.93872e-26
1856	AT1G18470	1186	1349	1017	1059	961	896	AT1G18470	1076.19	1190.99	961.396	0.807225	-0.308957	0.000365482	0.00147702
1857	AT1G18480	648	898	674	779	701	627	AT1G18480	719.04	743.285	694.794	0.934761	-0.0973305	0.409134	0.676572
1858	AT1G18485	136	169	123	172	150	192	AT1G18485	157.312	144.184	170.439	1.1821	0.24135	0.146878	0.301786
1859	AT1G18486	0	9	0	0	0	0	AT1G18486	2.39943	3.8098	0.989053	0.259607	-1.9456	0.344676	0.596518
1860	AT1G18490	121	152	127	240	219	212	AT1G18490	178.587	135.146	222.028	1.64288	0.71623	2.93853e-06	1.62888e-05
1861	AT1G18500	1181	1321	1013	1098	1148	1134	AT1G18500	1147.39	1179.14	1115.64	0.946147	-0.0798635	0.257992	0.474765
1862	AT1G18510	1	0	0	0	0	0	AT1G18510	1.17261	1.35617	0.989053	0.729298	-0.455421	0.987682	1
1863	AT1G18520	0	0	0	0	0	0	AT1G18520	1.00016	1.01126	0.989053	0.97804	-0.0320349	1	1
1864	AT1G18530	0	0	0	1	4	0	AT1G18530	1.82802	1.01126	2.64477	2.61532	1.38699	0.477426	0.756483
1865	AT1G18540	5354	6581	5190	8607	7784	7937	AT1G18540	6877.32	5738.55	8016.1	1.39689	0.482215	9.65605e-19	1.47008e-17
1866	AT1G18550	132	171	143	259	295	243	AT1G18550	207.177	150.534	263.82	1.75256	0.809466	1.86769e-08	1.30926e-07
1867	AT1G18560	172	193	177	191	195	184	AT1G18560	186.077	183.255	188.898	1.03079	0.0437562	0.776368	1
1868	AT1G18570	1616	1958	1542	1049	924	989	AT1G18570	1346.05	1715.25	976.839	0.569501	-0.812229	4.01308e-30	1.02806e-28
1869	AT1G18580	511	646	547	972	949	821	AT1G18580	738.443	572.538	904.348	1.57954	0.659508	1.00844e-12	1.02986e-11
1870	AT1G18590	335	350	303	119	151	107	AT1G18590	229.214	333.075	125.353	0.376351	-1.40985	7.61536e-24	1.48732e-22
1871	AT1G18600	223	325	240	534	529	464	AT1G18600	384.212	264.281	504.143	1.9076	0.931761	9.1359e-17	1.244e-15
1872	AT1G18610	74	85	113	154	134	150	AT1G18610	119.214	93.1255	145.303	1.56029	0.641818	0.00044766	0.00177822
1873	AT1G18620	40	54	52	72	98	62	AT1G18620	63.807	50.0797	77.5342	1.54821	0.630605	0.0199052	0.054366
1874	AT1G18630	261	369	300	314	287	246	AT1G18630	296.139	312.393	279.885	0.895938	-0.15853	0.235155	0.441602
1875	AT1G18640	410	547	405	531	460	469	AT1G18640	469.147	456.451	481.843	1.05563	0.0781022	0.477255	0.756483
1876	AT1G18650	136	164	152	289	215	249	AT1G18650	200.88	152.936	248.825	1.62699	0.702209	1.14256e-06	6.67335e-06
1877	AT1G18660	1135	1542	1236	1252	1111	1113	AT1G18660	1228.6	1311.24	1145.95	0.873941	-0.194392	0.0426904	0.105843
1878	AT1G18670	224	235	225	340	294	269	AT1G18670	264.788	231.309	298.267	1.28947	0.36678	0.00362725	0.0119024
1879	AT1G18680	169	165	162	128	185	152	AT1G18680	161.385	168.183	154.588	0.919166	-0.121602	0.489104	0.769299
1880	AT1G18690	236	294	185	243	252	260	AT1G18690	244.787	239.578	249.995	1.04348	0.0614046	0.726774	1
1881	AT1G18700	983	1149	922	1217	1210	1124	AT1G18700	1098.18	1025.02	1171.33	1.14274	0.192501	0.011659	0.0338885
1882	AT1G18710	2	7	9	0	0	2	AT1G18710	4.36602	7.07632	1.65572	0.23398	-2.09554	0.0536043	0.129001
1883	AT1G18720	2779	3318	2724	3592	3384	3400	AT1G18720	3189.85	2959.36	3420.33	1.15577	0.208853	0.000443856	0.00176388
1884	AT1G18730	7	14	11	166	157	124	AT1G18730	79.93	11.6883	148.172	12.6769	3.66413	3.40212e-40	1.20518e-38
1885	AT1G18740	22009	25809	20834	18940	17635	17203	AT1G18740	20370.7	23021.8	17719.6	0.769688	-0.377654	2.68378e-14	3.0834e-13
1886	AT1G18750	34	30	27	92	101	135	AT1G18750	70.4889	31.6625	109.315	3.45251	1.78765	3.89008e-09	2.89637e-08
1887	AT1G18760	0	0	0	0	0	0	AT1G18760	1.00016	1.01126	0.989053	0.97804	-0.0320349	1	1
1888	AT1G18770	0	1	0	0	0	0	AT1G18770	1.15563	1.32221	0.989053	0.74803	-0.418832	0.987654	1
1889	AT1G18773	30	40	36	12	25	24	AT1G18773	28.891	36.591	21.191	0.579133	-0.788034	0.0322488	0.0829106
1890	AT1G18780	0	7	0	0	0	0	AT1G18780	2.08848	3.18791	0.989053	0.310252	-1.68849	0.358243	0.614061
1891	AT1G18790	0	0	0	0	0	0	AT1G18790	1.00016	1.01126	0.989053	0.97804	-0.0320349	1	1
1892	AT1G18800	681	885	686	877	777	756	AT1G18800	774.806	754.89	794.721	1.05276	0.0741829	0.418618	0.688611
1893	AT1G18810	0	0	0	0	0	0	AT1G18810	1.00016	1.01126	0.989053	0.97804	-0.0320349	1	1
1894	AT1G18830	13	9	4	2	1	7	AT1G18830	7.00787	9.71525	4.30049	0.442654	-1.17575	0.13884	0.288319
1895	AT1G18835	0	0	2	0	0	0	AT1G18835	1.35556	1.72206	0.989053	0.574343	-0.800015	0.822685	1
1896	AT1G18840	568	646	449	785	702	645	AT1G18840	630.215	557.369	703.062	1.2614	0.33502	0.00496269	0.015845
1897	AT1G18850	327	427	319	367	379	359	AT1G18850	362.625	359.945	365.305	1.01489	0.0213236	0.905028	1
1898	AT1G18860	2	11	13	5	14	4	AT1G18860	9.17135	9.74172	8.60098	0.882902	-0.179674	0.8605	1
1899	AT1G18870	9	4	8	3	9	8	AT1G18870	7.91267	8.20245	7.62288	0.929341	-0.10572	0.967877	1
1900	AT1G18871	0	0	0	0	0	0	AT1G18871	1.00016	1.01126	0.989053	0.97804	-0.0320349	1	1
1901	AT1G18880	41	39	54	32	27	23	AT1G18880	37.2216	46.4712	27.9721	0.601922	-0.73235	0.028289	0.0738223
1902	AT1G18890	1426	1607	1347	1285	1112	1076	AT1G18890	1307.93	1471.27	1144.59	0.777958	-0.362237	4.13498e-07	2.53942e-06
1903	AT1G18900	1378	1606	1258	1362	1282	1294	AT1G18900	1360.76	1422.78	1298.75	0.912825	-0.13159	0.0566185	0.135298
1904	AT1G18910	593	636	445	727	664	655	AT1G18910	618.245	561.46	675.03	1.20228	0.265768	0.0149877	0.0423642
1905	AT1G18940	103	137	84	78	67	54	AT1G18940	87.7296	108.991	66.4685	0.609854	-0.713463	0.000689918	0.00264253
1906	AT1G18950	942	1089	939	1135	1054	976	AT1G18950	1020.91	998.262	1043.56	1.04538	0.0640289	0.407261	0.674372
1907	AT1G18960	0	0	0	0	0	0	AT1G18960	1.00016	1.01126	0.989053	0.97804	-0.0320349	1	1
1908	AT1G18970	4	5	6	0	0	0	AT1G18970	3.53355	6.07805	0.989053	0.162725	-2.61949	0.0410798	0.102402
1909	AT1G18980	176	207	203	233	174	187	AT1G18980	197.333	198.228	196.438	0.99097	-0.0130863	0.968015	1
1910	AT1G18990	8	13	6	14	8	18	AT1G18990	12.0572	9.94529	14.1691	1.42471	0.510665	0.418102	0.688034
1911	AT1G19000	4096	5209	4131	5325	4970	4729	AT1G19000	4726.18	4501.66	4950.69	1.09975	0.137174	0.0494557	0.12037
1912	AT1G19010	257	325	214	306	271	280	AT1G19010	275.037	266.767	283.306	1.062	0.0867773	0.538466	0.825511
1913	AT1G19020	4379	5392	4382	2266	1954	1873	AT1G19020	3376.28	4745.38	2007.18	0.422976	-1.24135	8.27216e-59	4.80881e-57
1914	AT1G19025	162	186	203	112	121	98	AT1G19025	148.483	186.87	110.096	0.589161	-0.763266	5.28947e-06	2.83446e-05
1915	AT1G19040	0	0	0	0	0	0	AT1G19040	1.00016	1.01126	0.989053	0.97804	-0.0320349	1	1
1916	AT1G19050	6	2	8	5	3	6	AT1G19050	6.0734	6.54582	5.60098	0.855658	-0.224894	0.890991	1
1917	AT1G19060	0	0	0	0	0	1	AT1G19060	1.16682	1.01126	1.32239	1.30766	0.386989	1	1
1918	AT1G19070	14	28	32	26	32	29	AT1G19070	27.8119	25.9194	29.7044	1.14603	0.196647	0.623161	0.909534
1919	AT1G19080	152	166	121	164	150	199	AT1G19080	159.126	148.059	170.194	1.1495	0.201008	0.228009	0.431456
1920	AT1G19086	0	0	0	0	0	0	AT1G19086	1.00016	1.01126	0.989053	0.97804	-0.0320349	1	1
1921	AT1G19090	15	17	9	0	0	0	AT1G19090	7.82936	14.6697	0.989053	0.0674216	-3.89064	2.28009e-05	0.000111649
1922	AT1G19100	197	272	195	353	263	238	AT1G19100	252.316	222.84	281.791	1.26455	0.338619	0.0981465	0.216489
1923	AT1G19110	519	761	574	829	750	755	AT1G19110	695.283	620.652	769.914	1.24049	0.310912	0.0056191	0.0176691
1924	AT1G19115	3	2	1	27	23	50	AT1G19115	18.525	3.02329	34.0268	11.2549	3.49248	1.4871e-05	7.47148e-05
1925	AT1G19120	525	603	515	529	463	518	AT1G19120	525.577	552.623	498.531	0.902118	-0.148611	0.122809	0.260314
1926	AT1G19130	856	1022	867	1321	1230	1091	AT1G19130	1061.35	922.177	1200.53	1.30184	0.380553	2.69646e-06	1.50266e-05
1927	AT1G19140	1232	1401	1106	1358	1220	1153	AT1G19140	1242.22	1254.65	1229.79	0.980182	-0.0288784	0.674392	0.962518
1928	AT1G19150	27	22	41	36	30	43	AT1G19150	34.3322	31.7361	36.9283	1.1636	0.2186	0.494779	0.775624
1929	AT1G19160	0	0	0	0	0	0	AT1G19160	1.00016	1.01126	0.989053	0.97804	-0.0320349	1	1
1930	AT1G19170	255	318	247	410	385	376	AT1G19170	331.232	275.629	386.834	1.40346	0.488986	3.01364e-05	0.000145037
1931	AT1G19180	13482	16000	12985	9310	8889	8602	AT1G19180	11536.9	14241.2	8832.73	0.620226	-0.689134	3.46557e-41	1.26897e-39
1932	AT1G19190	13	31	19	19	22	30	AT1G19190	23.1674	21.8871	24.4477	1.11699	0.159617	0.770878	1
1933	AT1G19200	324	355	273	51	58	53	AT1G19200	187.302	320.174	54.4307	0.170004	-2.55636	6.29207e-54	3.27308e-52
1934	AT1G19210	5171	6471	5122	4885	4621	4444	AT1G19210	5107.28	5617.06	4597.51	0.818491	-0.288961	5.63689e-06	3.00936e-05
1935	AT1G19220	2425	2960	2200	1380	1282	1176	AT1G19220	1902.46	2539.71	1265.21	0.498173	-1.00528	3.41692e-24	6.78546e-23
1936	AT1G19230	412	451	387	843	866	748	AT1G19230	615.826	420.892	810.76	1.92629	0.945824	1.09681e-24	2.22498e-23
1937	AT1G19240	204	278	181	233	228	244	AT1G19240	227.791	222.144	233.438	1.05084	0.0715436	0.665794	0.953949
1938	AT1G19250	30	32	8	11	7	13	AT1G19250	17.6771	24.1522	11.202	0.463808	-1.1084	0.0801184	0.182082
1939	AT1G19260	4	0	0	0	0	0	AT1G19260	1.68998	2.39091	0.989053	0.413673	-1.27344	0.556099	0.842478
1940	AT1G19270	430	492	414	424	380	362	AT1G19270	417.23	449.446	385.014	0.856642	-0.223235	0.0343485	0.0877121
1941	AT1G19290	189	207	183	221	235	267	AT1G19290	217.587	195.604	239.57	1.22477	0.292509	0.0365742	0.0926737
1942	AT1G19300	119	184	169	338	284	269	AT1G19300	226.811	159.333	294.289	1.84701	0.885189	3.5917e-08	2.44963e-07
1943	AT1G19310	1017	1352	1128	1053	909	985	AT1G19310	1072.44	1173.08	971.795	0.828413	-0.271578	0.003744	0.0122397
1944	AT1G19320	12	13	3	8	0	0	AT1G19320	6.91344	10.2587	3.56814	0.347815	-1.52361	0.0970047	0.214405
1945	AT1G19330	82	81	59	43	43	60	AT1G19330	62.3172	75.4495	49.185	0.651893	-0.617293	0.0134119	0.0384251
1946	AT1G19340	59	72	63	75	80	46	AT1G19340	66.6538	66.1395	67.168	1.01555	0.0222609	0.948341	1
1947	AT1G19350	189	208	228	270	217	204	AT1G19350	220.137	211.908	228.367	1.07767	0.107913	0.46119	0.73746
1948	AT1G19360	1297	1709	1275	1246	1153	1207	AT1G19360	1311.13	1432.91	1189.35	0.830024	-0.268774	0.00273543	0.00924589
1949	AT1G19370	909	1052	831	977	908	824	AT1G19370	915.142	936.991	893.293	0.953364	-0.0689015	0.372657	0.631525
1950	AT1G19380	6726	8543	6874	4348	4131	3981	AT1G19380	5763.53	7420.34	4106.72	0.553441	-0.853498	2.95475e-29	7.32122e-28
1951	AT1G19390	0	0	0	0	0	0	AT1G19390	1.00016	1.01126	0.989053	0.97804	-0.0320349	1	1
1952	AT1G19394	48	82	58	94	91	77	AT1G19394	75.4857	63.678	87.2933	1.37086	0.455076	0.0522642	0.126301
1953	AT1G19396	181	194	116	239	188	186	AT1G19396	183.848	164.991	202.706	1.22859	0.297003	0.143057	0.295565
1954	AT1G19397	243	254	155	288	246	270	AT1G19397	242.364	218.893	265.836	1.21446	0.280313	0.10855	0.235182
1955	AT1G19400	512	567	470	697	547	585	AT1G19400	561.989	520.952	603.025	1.15755	0.211069	0.0346746	0.0884287
1956	AT1G19410	4	2	1	0	1	3	AT1G19410	2.84529	3.3682	2.32239	0.689503	-0.536372	0.751582	1
1957	AT1G19430	825	848	756	1101	1043	987	AT1G19430	925.266	817.93	1032.6	1.26246	0.336236	1.99257e-05	9.85098e-05
1958	AT1G19440	379	490	407	499	464	415	AT1G19440	441.802	428.745	454.86	1.06091	0.0853002	0.425079	0.69682
1959	AT1G19450	834	1074	843	791	749	717	AT1G19450	833.446	922.229	744.663	0.80746	-0.308537	0.000134345	0.000583028
1960	AT1G19460	0	0	0	0	0	0	AT1G19460	1.00016	1.01126	0.989053	0.97804	-0.0320349	1	1
1961	AT1G19470	0	0	0	0	0	0	AT1G19470	1.00016	1.01126	0.989053	0.97804	-0.0320349	1	1
1962	AT1G19480	193	264	195	273	251	227	AT1G19480	233.653	218.973	248.334	1.13409	0.18153	0.195268	0.380277
1963	AT1G19485	279	353	256	695	638	599	AT1G19485	467.685	297.989	637.381	2.13894	1.0969	2.36708e-26	5.17674e-25
1964	AT1G19490	1048	1272	1120	2272	2127	1941	AT1G19490	1622.75	1156.05	2089.45	1.8074	0.853915	1.96785e-29	4.90717e-28
1965	AT1G19500	0	0	0	2	0	0	AT1G19500	1.32254	1.01126	1.63382	1.61563	0.692099	0.849864	1
1966	AT1G19510	2	0	0	0	0	0	AT1G19510	1.34507	1.70108	0.989053	0.581425	-0.782334	0.823113	1
1967	AT1G19520	668	796	655	994	843	873	AT1G19520	802.577	711.714	893.441	1.25534	0.328074	8.27912e-05	0.000371809
1968	AT1G19530	2120	2501	1996	5989	5676	5404	AT1G19530	3922.19	2219.28	5625.09	2.53464	1.34178	4.45534e-117	7.77e-115
1969	AT1G19540	448	437	356	1012	1020	828	AT1G19540	680.591	417.939	943.244	2.2569	1.17434	1.01146e-17	1.45367e-16
1970	AT1G19550	81	121	86	100	105	83	AT1G19550	96.5163	97.1383	95.8943	0.987194	-0.018595	0.909374	1
1971	AT1G19570	1273	1715	1375	1358	1319	1369	AT1G19570	1398.41	1462.04	1334.79	0.912966	-0.131367	0.114424	0.245816
1972	AT1G19580	887	1079	877	989	822	871	AT1G19580	919.155	954.147	884.162	0.926652	-0.109901	0.160132	0.323211
1973	AT1G19600	1221	1550	1318	2177	1935	2011	AT1G19600	1695.35	1372.54	2018.16	1.47039	0.556194	1.39328e-16	1.87281e-15
1974	AT1G19610	16	13	18	36	29	26	AT1G19610	23.9488	16.9694	30.9283	1.82259	0.865993	0.0314355	0.0810752
1975	AT1G19620	0	0	0	0	0	0	AT1G19620	1.00016	1.01126	0.989053	0.97804	-0.0320349	1	1
1976	AT1G19630	262	323	276	87	100	90	AT1G19630	191.137	289.905	92.37	0.318622	-1.65008	6.24181e-27	1.3965e-25
1977	AT1G19640	4	0	2	2	0	0	AT1G19640	2.36776	3.1017	1.63382	0.526751	-0.924808	0.612409	0.898953
1978	AT1G19650	405	555	446	511	400	406	AT1G19650	453.09	471.785	434.395	0.920747	-0.119123	0.363893	0.620846
1979	AT1G19660	3369	3980	3161	4053	3668	3494	AT1G19660	3609.48	3524.01	3694.95	1.04851	0.0683364	0.301896	0.537068
1980	AT1G19670	41	54	43	55	50	41	AT1G19670	48.1398	47.2261	49.0536	1.0387	0.0547761	0.880742	1
1981	AT1G19680	1197	1394	1114	2064	1982	1898	AT1G19680	1601.49	1243.25	1959.73	1.5763	0.656538	8.47126e-22	1.51824e-20
1982	AT1G19690	222	266	207	328	331	263	AT1G19690	269.297	233.862	304.732	1.30304	0.381883	0.00282414	0.00951028
1983	AT1G19700	658	745	624	514	475	444	AT1G19700	577.209	681.389	473.029	0.694212	-0.526552	1.65485e-08	1.16577e-07
1984	AT1G19710	267	334	273	326	341	280	AT1G19710	303.535	293.984	313.087	1.06498	0.0908268	0.471708	0.750134
1985	AT1G19715	875	1119	921	672	641	584	AT1G19715	802.025	978.084	625.966	0.639992	-0.643874	8.64524e-15	1.02084e-13
1986	AT1G19720	711	781	797	998	927	856	AT1G19720	844.706	772.348	917.063	1.18737	0.247771	0.00361514	0.0118671
1987	AT1G19730	583	720	597	703	702	684	AT1G19730	663.889	638.152	689.626	1.08066	0.111916	0.220298	0.419731
1988	AT1G19740	698	795	679	813	766	707	AT1G19740	742.185	730.28	754.089	1.0326	0.0462841	0.593095	0.877514
1989	AT1G19750	47	64	47	62	68	47	AT1G19750	56.5685	53.8266	59.3103	1.10188	0.139963	0.629462	0.916273
1990	AT1G19770	16182	18614	15394	17996	17242	16979	AT1G19770	17025.5	16841.4	17209.6	1.02187	0.0312057	0.557947	0.843232
1991	AT1G19780	5	12	2	8	6	4	AT1G19780	7.03974	7.17801	6.90147	0.961475	-0.0566793	0.969098	1
1992	AT1G19790	8	3	0	10	2	6	AT1G19790	5.79149	4.7034	6.87958	1.46268	0.548616	0.571052	0.856688
1993	AT1G19800	476	568	444	555	503	464	AT1G19800	500.926	499.606	502.247	1.00529	0.00760608	0.968418	1
1994	AT1G19830	43	56	38	77	61	64	AT1G19830	57.1201	46.7608	67.4794	1.44308	0.529149	0.0469065	0.114905
1995	AT1G19835	256	311	267	501	428	395	AT1G19835	358.872	280.905	436.838	1.55511	0.637013	1.56352e-08	1.10371e-07
1996	AT1G19840	1	4	1	3	2	0	AT1G19840	2.78912	2.95537	2.62288	0.887496	-0.172188	0.980616	1
1997	AT1G19850	966	1207	913	241	278	227	AT1G19850	640.504	1033.99	247.017	0.238897	-2.06554	8.54682e-68	5.90164e-66
[truncated: 25,209 more rows]
