# Supplementary material for: Combinations of maternal-specific repressive epigenetic marks in the endosperm control seed dormancy
Source: eLife journal article supplement (doi:10.7554/elife.64593), 2021-08-24
Supplement: supp [file elife-64593-supp-v1.zip › elife_poa_e64593_Figure_7_figure_supplement_3.pdf]

| AGI code  | Name   | Log2FC  | pvalue  | Description                                              |
|-----------|--------|---------|---------|----------------------------------------------------------|
| AT1G27570 |        | 3.55276 | 1.1E-06 | phosphatidylinositol 3- and 4-kinase family protein      |
| AT4G31650 |        | 1.9492  | 0.00851 | transcriptional factor B3 family protein                 |
| AT4G29200 | DEG3   | 1.89793 | 6.3E-25 | over-expressed by salt stress                            |
| AT2G46420 |        | 1.84373 | 6.6E-60 | helicase with zinc finger protein                        |
| AT1G17580 | MYA1   | 1.62722 | 3.7E-14 | member of the type XI myosin protein family              |
| AT3G58640 |        | 1.56124 | 1.1E-24 | MAPKKK-like protein                                      |
| AT1G59890 | SNL5   | 1.53126 | 1.8E-08 | related to histone deacetylation                         |
| AT2G19390 |        | 1.51376 | 3.7E-10 | serine/arginine repetitive matrix protein                |
| AT1G47500 | RBP47C | 1.49849 | 2.2E-24 | RNA-binding protein                                      |
| AT1G49600 | RBP47A | 1.4612  | 8E-170  | RNA-binding protein                                      |
| AT5G42670 |        | 1.45621 | 0.00365 | Agenet domain-containing protein                         |
| AT4G10730 |        | 1.39714 | 4.7E-16 | protein kinase superfamily protein                       |
| AT3G51120 |        | 1.36742 | 1.4E-21 | zinc finger CCCH domain-containing protein               |
| AT3G12200 | NEK7   | 1.24968 | 1.1E-09 | member of the NIMA-related serine/threonine kinases      |
| AT5G24430 |        | 1.24295 | 5.2E-20 | calcium-dependent protein kinase (CDPK) family protein   |
| AT1G07705 | NOT2A  | 1.2257  | 0.00019 | a negative regulator of translation                      |
| AT5G20320 | DCL4   | 1.22428 | 6.2E-05 | related to RNA processing                                |
| AT5G43810 | AGO10  | 1.22149 | 0.00199 | related to RNA processing                                |
| AT1G08600 | ATRX   | 1.21933 | 3.8E-16 | related to chromatin remodeling                          |
| AT3G24520 | HSFC1  | 1.19593 | 6.4E-47 | HSF type transcription factor related to seed dormancy   |
| AT1G47490 | RBP47C | 1.18058 | 1.7E-24 | RNA-binding protein                                      |
| AT5G50350 |        | 1.16848 | 1.1E-09 | hypothetical protein                                     |
| AT3G50780 | BTBPOZ | 1.14854 | 0.00013 | BTB/POZ domain protein related to protein ubiquitination |
| AT3G24650 | ABI3   | 1.07477 | 7.2E-82 | B3 type transcription factor related to seed dormancy    |
| AT4G11330 | MPK5   | 1.07155 | 0.00206 | MAP kinase                                               |
| AT5G38600 |        | 1.00075 | 3.2E-07 | proline-rich spliceosome-associated (PSP) family protein |
