# Supplementary material for: Combinations of maternal-specific repressive epigenetic marks in the endosperm control seed dormancy
Source: eLife journal article supplement (doi:10.7554/elife.64593), 2021-08-24
Supplement: supp [file elife-64593-supp-v1.zip › elife_poa_e64593_Figure_7_source_data_1.xlsx]

## Sheet: Figure 7-source data 1
Figure 7-source data 1. Transcriptome analysis of suvh456 endosperm during germination.
		raw read counts	raw read counts	raw read counts	raw read counts	raw read counts	raw read counts			wt	suvh456	suvh456/wt
id	id	endo_wt_rep1	endo_wt_rep2	endo_wt_rep3	endo_suv_rep1	endo_suv_rep2	endo_suv_rep3	id	baseMean	baseMeanA	baseMeanB	foldChange(baseMeanB/baseMeanA)	log2FoldChange	pval	padj
1	AT1G01010	9	3	11	15	13	18	AT1G01010	11.8414	11.8495	11.8333	0.998627	-0.00198177	1	1
2	AT1G01020	21	32	39	84	61	33	AT1G01020	43.0039	43.9846	42.0232	0.955406	-0.0658141	0.987263	1
3	AT1G01030	11	8	5	13	21	6	AT1G01030	11.0255	12.1799	9.8712	0.810453	-0.3032	0.739705	0.915567
4	AT1G01040	164	177	117	528	487	443	AT1G01040	278.413	210.034	346.793	1.65113	0.723453	2.3395e-06	1.1973e-05
5	AT1G01050	163	126	209	572	614	440	AT1G01050	306.624	229.593	383.656	1.67103	0.740736	0.000119605	0.000489614
6	AT1G01060	46	71	64	456	490	439	AT1G01060	207.455	84.8866	330.024	3.88782	1.95896	2.02052e-26	4.28452e-25
7	AT1G01070	94	90	72	118	168	128	AT1G01070	108.377	117.936	98.8179	0.837893	-0.255162	0.279111	0.484217
8	AT1G01073	0	0	0	0	0	0	AT1G01073	1.04405	1.37209	0.716013	0.52184	-0.938321	0.86677	0.937107
9	AT1G01080	135	73	119	161	205	151	AT1G01080	136.299	149.721	122.877	0.820706	-0.285062	0.270491	0.47282
10	AT1G01090	1988	1873	1603	2481	2594	2118	AT1G01090	2097.03	2490.66	1703.4	0.683914	-0.548113	8.9836e-14	9.01209e-13
11	AT1G01100	3130	3011	2925	6595	6456	5288	AT1G01100	4240.05	4141.83	4338.27	1.04743	0.066849	0.124139	0.257952
12	AT1G01110	69	87	89	307	304	251	AT1G01110	159.401	114.102	204.7	1.79401	0.843185	1.77093e-05	8.10972e-05
13	AT1G01115	0	0	0	0	0	0	AT1G01115	1.04405	1.37209	0.716013	0.52184	-0.938321	0.86677	0.937107
14	AT1G01120	125	77	106	188	202	168	AT1G01120	137.061	141.165	132.958	0.941866	-0.0864066	0.657543	0.865433
15	AT1G01130	33	46	41	29	41	35	AT1G01130	41.1653	56.6075	25.7231	0.454411	-1.13793	0.00381586	0.0120869
16	AT1G01140	157	183	183	225	270	237	AT1G01140	208.186	241.488	174.883	0.724188	-0.465563	0.00800774	0.0236643
17	AT1G01150	2	2	0	1	0	0	AT1G01150	2.05111	3.15926	0.942948	0.298471	-1.74434	0.424157	0.65624
18	AT1G01160	317	249	240	601	597	508	AT1G01160	386.193	367.425	404.961	1.10216	0.140333	0.306008	0.520784
19	AT1G01170	271	264	236	231	223	200	AT1G01170	254.565	353.162	155.968	0.441635	-1.17907	4.8767e-14	4.99155e-13
20	AT1G01180	249	237	257	313	369	286	AT1G01180	285.457	341.195	229.72	0.673282	-0.570717	0.000122772	0.000500993
21	AT1G01190	0	2	0	0	0	2	AT1G01190	1.7865	2.3149	1.25809	0.543476	-0.879712	0.748433	0.919603
22	AT1G01200	21	30	33	55	45	57	AT1G01200	39.3146	40.1708	38.4584	0.957373	-0.0628465	0.907739	0.966082
23	AT1G01210	52	42	45	156	138	95	AT1G01210	78.3066	64.6573	91.9559	1.4222	0.508128	0.0702026	0.159827
24	AT1G01220	109	119	98	445	432	361	AT1G01220	222.06	150.381	293.74	1.95331	0.96592	1.23988e-08	8.07374e-08
25	AT1G01225	34	36	31	35	56	23	AT1G01225	37.3167	47.5306	27.1028	0.570218	-0.810414	0.0560011	0.131421
26	AT1G01230	159	149	126	332	305	268	AT1G01230	207.114	199.03	215.199	1.08124	0.112683	0.538071	0.768536
27	AT1G01240	126	134	112	644	696	576	AT1G01240	313.032	171.328	454.736	2.65418	1.40827	7.16248e-22	1.18819e-20
28	AT1G01250	33	15	41	85	64	61	AT1G01250	46.2437	41.994	50.4934	1.2024	0.265912	0.517955	0.750786
29	AT1G01260	217	174	172	583	662	547	AT1G01260	341.466	257.313	425.619	1.65409	0.726038	1.51331e-07	8.86928e-07
30	AT1G01280	4	0	0	0	0	1	AT1G01280	2.02394	3.06082	0.987053	0.32248	-1.63272	0.423973	0.65624
31	AT1G01290	117	105	78	345	343	284	AT1G01290	184.18	137.588	230.771	1.67726	0.746104	6.76722e-05	0.00028785
32	AT1G01300	23295	22078	22016	30435	31911	25353	AT1G01300	25757.8	30778.6	20737	0.673747	-0.569721	5.40178e-49	2.5514e-47
33	AT1G01305	0	0	0	0	2	0	AT1G01305	1.26209	1.37209	1.15209	0.839658	-0.252127	1	1
34	AT1G01310	17	7	9	8	5	5	AT1G01310	10.5662	16.1556	4.97688	0.30806	-1.69872	0.0310991	0.07911
35	AT1G01320	308	326	284	1060	1070	879	AT1G01320	566.895	420.978	712.812	1.69323	0.759777	1.20756e-12	1.10615e-11
36	AT1G01340	48	65	58	140	148	125	AT1G01340	89.334	80.0315	98.6365	1.23247	0.301554	0.23892	0.433882
37	AT1G01350	145	133	93	239	250	187	AT1G01350	164.967	169.786	160.147	0.943229	-0.0843197	0.653627	0.863473
38	AT1G01355	24	10	12	29	22	27	AT1G01355	20.6863	21.9606	19.412	0.88395	-0.177964	0.710003	0.889067
39	AT1G01360	50	37	24	65	97	51	AT1G01360	50.9234	51.4073	50.4395	0.981174	-0.0274191	0.944864	0.993811
40	AT1G01370	14	5	13	29	21	21	AT1G01370	16.714	15.8603	17.5678	1.10766	0.147515	0.872223	0.941841
41	AT1G01380	349	329	296	294	311	223	AT1G01380	320.565	445.444	195.687	0.439307	-1.1867	3.54681e-17	4.48811e-16
42	AT1G01390	28	22	14	32	13	18	AT1G01390	22.9772	30.2632	15.6912	0.51849	-0.947612	0.064852	0.149522
43	AT1G01400	0	1	0	0	0	0	AT1G01400	1.27976	1.8435	0.716013	0.388399	-1.36439	0.69833	0.878823
44	AT1G01410	1	0	0	1	0	0	AT1G01410	1.36861	1.79427	0.942948	0.525532	-0.92815	0.79702	0.937107
45	AT1G01420	6	5	4	8	8	4	AT1G01420	6.7681	8.17623	5.35996	0.655553	-0.609215	0.580449	0.793872
46	AT1G01430	69	41	65	54	88	62	AT1G01430	64.9478	80.9332	48.9623	0.604972	-0.725059	0.017681	0.0481415
47	AT1G01440	175	94	85	312	464	273	AT1G01440	203.461	160.239	246.683	1.53947	0.622435	0.0619944	0.143677
48	AT1G01450	13	11	16	60	57	51	AT1G01450	30.1427	19.702	40.5833	2.05986	1.04254	0.0257302	0.0671028
49	AT1G01453	4	2	0	2	0	0	AT1G01453	2.58676	4.00363	1.16988	0.292206	-1.77494	0.329834	0.55167
50	AT1G01460	1	0	0	0	0	0	AT1G01460	1.25514	1.79427	0.716013	0.399054	-1.32534	0.696842	0.878823
51	AT1G01470	846	856	782	1529	1677	1317	AT1G01470	1103.28	1136.25	1070.31	0.941964	-0.0862561	0.293016	0.502889
52	AT1G01471	0	0	0	0	0	0	AT1G01471	1.04405	1.37209	0.716013	0.52184	-0.938321	0.86677	0.937107
53	AT1G01480	5	12	9	48	55	45	AT1G01480	24.6221	13.4464	35.7978	2.66225	1.41265	0.00661072	0.0198929
54	AT1G01490	549	520	485	534	518	509	AT1G01490	541.579	710.356	372.802	0.524811	-0.930131	5.57785e-18	7.41696e-17
55	AT1G01500	301	280	223	405	457	322	AT1G01500	323.346	367.149	279.543	0.761388	-0.393296	0.00460551	0.0143312
56	AT1G01510	324	256	368	977	1095	783	AT1G01510	554.168	434.929	673.407	1.54832	0.630699	2.2119e-05	0.000100045
57	AT1G01520	16	8	11	63	79	49	AT1G01520	31.3403	17.1618	45.5189	2.65234	1.40726	0.00262492	0.00857073
58	AT1G01530	3	4	4	0	5	0	AT1G01530	4.12224	6.43829	1.8062	0.280541	-1.83372	0.203276	0.384279
59	AT1G01540	191	235	173	687	794	608	AT1G01540	385.053	275.571	494.535	1.79459	0.84365	9.54336e-11	7.53662e-10
60	AT1G01550	705	642	613	1793	1994	1507	AT1G01550	1072.91	894.977	1250.84	1.39762	0.48297	1.07048e-09	7.68026e-09
61	AT1G01560	22	25	40	99	57	76	AT1G01560	48.8976	41.5855	56.2098	1.35167	0.434741	0.281796	0.48757
62	AT1G01570	2	8	0	11	8	14	AT1G01570	7.36943	5.98769	8.75117	1.46153	0.547475	0.626733	0.839946
63	AT1G01580	31	39	37	63	109	77	AT1G01580	55.0992	50.5493	59.6491	1.18002	0.238811	0.467786	0.69628
64	AT1G01590	14	3	7	4	2	13	AT1G01590	8.81487	12.0464	5.58335	0.463487	-1.1094	0.167846	0.327954
65	AT1G01600	12	16	19	19	45	30	AT1G01600	23.0215	23.0724	22.9707	0.995592	-0.00637306	1	1
66	AT1G01610	200	145	126	229	264	185	AT1G01610	187.421	214.454	160.389	0.747893	-0.419097	0.0178863	0.0486178
67	AT1G01620	651	562	627	924	944	772	AT1G01620	733.32	841.166	625.475	0.743581	-0.427438	5.50894e-06	2.68451e-05
68	AT1G01630	106	46	95	206	188	143	AT1G01630	120.24	113.266	127.214	1.12315	0.167547	0.617428	0.830625
69	AT1G01640	23	15	31	20	17	17	AT1G01640	23.2781	32.9871	13.569	0.411344	-1.28158	0.0146822	0.040797
70	AT1G01650	242	272	265	556	586	507	AT1G01650	375.323	358.566	392.079	1.09346	0.128905	0.299144	0.511502
71	AT1G01660	5	2	1	0	0	0	AT1G01660	2.81016	4.90432	0.716013	0.145997	-2.77599	0.118604	0.248096
72	AT1G01670	10	4	0	1	0	1	AT1G01670	4.34676	7.47952	1.21399	0.162308	-2.62319	0.0672497	0.154097
73	AT1G01680	0	0	0	0	0	2	AT1G01680	1.31509	1.37209	1.25809	0.916916	-0.125139	1	1
74	AT1G01690	8	9	4	19	23	21	AT1G01690	13.3204	10.9062	15.7345	1.44271	0.52878	0.492882	0.724986
75	AT1G01695	2	4	0	0	2	2	AT1G01695	2.89812	4.10207	1.69417	0.413003	-1.27578	0.459241	0.686376
76	AT1G01700	0	4	3	16	15	12	AT1G01700	7.78163	4.69323	10.87	2.31611	1.2117	0.206377	0.387782
77	AT1G01710	124	93	102	276	332	257	AT1G01710	175.883	146.371	205.396	1.40326	0.488779	0.010478	0.0301148
78	AT1G01720	3671	3298	3328	8172	9259	7328	AT1G01720	5279.29	4698.36	5860.22	1.24729	0.318797	1.26119e-12	1.15295e-11
79	AT1G01725	73	34	37	64	62	69	AT1G01725	56.6919	65.9239	47.46	0.719921	-0.474089	0.196835	0.375218
80	AT1G01730	119	117	123	256	244	197	AT1G01730	165.515	165.622	165.408	0.998703	-0.00187299	0.992089	1
81	AT1G01740	6	5	0	19	24	20	AT1G01740	10.9718	6.2622	15.6815	2.50415	1.32432	0.114426	0.241361
82	AT1G01750	0	2	0	9	11	6	AT1G01750	4.54899	2.3149	6.78309	2.93018	1.55099	0.254269	0.456489
83	AT1G01760	0	0	4	18	21	14	AT1G01760	8.23016	3.28612	13.1742	4.00904	2.00326	0.0382907	0.0946258
84	AT1G01770	59	51	68	387	405	309	AT1G01770	171.729	82.8609	260.597	3.14499	1.65305	8.49772e-17	1.04848e-15
85	AT1G01780	32	50	43	176	198	155	AT1G01780	92.4336	59.0279	125.839	2.13186	1.09211	2.73633e-05	0.000122321
86	AT1G01790	37	28	27	91	113	73	AT1G01790	54.4516	43.1118	65.7913	1.52606	0.609813	0.0756982	0.170456
87	AT1G01800	472	395	376	1218	1295	949	AT1G01800	691.732	566.765	816.699	1.44098	0.527053	6.11798e-08	3.72779e-07
88	AT1G01810	56	41	36	21	7	30	AT1G01810	38.3536	61.5681	15.1391	0.245892	-2.0239	4.63206e-07	2.57604e-06
89	AT1G01820	228	215	272	745	648	601	AT1G01820	401.551	329.135	473.966	1.44003	0.526103	0.00058066	0.00213595
90	AT1G01830	149	104	117	487	458	448	AT1G01830	250.905	169.289	332.521	1.96422	0.97396	2.1703e-09	1.51833e-08
91	AT1G01840	11	44	13	57	57	54	AT1G01840	36.8471	32.9785	40.7156	1.23461	0.304058	0.630715	0.844076
92	AT1G01860	29	16	30	80	97	54	AT1G01860	45.0849	35.513	54.6567	1.53906	0.622048	0.0942148	0.204876
93	AT1G01880	2	2	7	23	14	14	AT1G01880	9.64572	6.50882	12.7826	1.96389	0.973715	0.253176	0.454797
94	AT1G01900	6	6	11	17	1	9	AT1G01900	9.61425	11.9972	7.23131	0.60275	-0.730368	0.396277	0.625149
95	AT1G01910	391	302	242	1085	1199	918	AT1G01910	590.895	424.608	757.183	1.78325	0.83451	2.04922e-12	1.83755e-11
96	AT1G01920	46	40	24	168	241	146	AT1G01920	91.0464	51.1328	130.96	2.56118	1.35681	7.75631e-07	4.20606e-06
97	AT1G01930	39	54	27	126	115	88	AT1G01930	67.2242	56.2127	78.2357	1.39178	0.476931	0.114912	0.242274
98	AT1G01940	77	46	62	89	67	91	AT1G01940	72.7093	85.2321	60.1864	0.706147	-0.501959	0.0673997	0.154389
99	AT1G01950	81	68	108	464	446	364	AT1G01950	210.61	119.303	301.917	2.53068	1.33952	2.85046e-14	2.96897e-13
100	AT1G01960	1138	877	912	2424	2692	2041	AT1G01960	1511.3	1331.64	1690.96	1.26984	0.344642	8.82982e-07	4.75409e-06
101	AT1G01970	110	54	60	228	259	172	AT1G01970	128.763	101.978	155.548	1.5253	0.609097	0.0206966	0.055187
102	AT1G01980	6	8	1	2	0	2	AT1G01980	4.93344	8.15492	1.71196	0.20993	-2.25202	0.0669095	0.153499
103	AT1G01990	332	401	317	676	850	668	AT1G01990	501.384	482.256	520.511	1.07932	0.110129	0.476652	0.7065
104	AT1G02000	162	158	207	215	210	204	AT1G02000	196.943	243.298	150.587	0.61894	-0.692128	0.0025875	0.00845998
105	AT1G02010	27	26	14	95	58	90	AT1G02010	45.5206	31.7266	59.3147	1.86956	0.902695	0.0330152	0.0832602
106	AT1G02020	264	161	319	388	360	297	AT1G02020	294.564	341.368	247.759	0.725784	-0.462388	0.189255	0.362852
107	AT1G02030	13	16	12	46	19	28	AT1G02030	21.5159	20.145	22.8869	1.13611	0.184098	0.770612	0.937107
108	AT1G02040	1	0	3	3	5	0	AT1G02040	2.8584	3.2298	2.48701	0.77002	-0.377033	0.928171	0.981072
109	AT1G02050	46	25	44	252	203	152	AT1G02050	98.4977	53.6319	143.363	2.6731	1.41851	2.18005e-07	1.25366e-06
110	AT1G02060	22	26	46	121	136	69	AT1G02060	60.729	44.9279	76.5301	1.7034	0.768414	0.0391501	0.0963472
111	AT1G02065	5	1	0	0	0	0	AT1G02065	2.33521	3.9544	0.716013	0.181067	-2.4654	0.205269	0.386099
112	AT1G02070	0	0	0	0	0	0	AT1G02070	1.04405	1.37209	0.716013	0.52184	-0.938321	0.86677	0.937107
113	AT1G02074	0	0	1	0	0	0	AT1G02074	1.28331	1.8506	0.716013	0.386908	-1.36994	0.698542	0.878823
114	AT1G02080	462	442	446	1388	1416	1276	AT1G02080	794.243	618.195	970.291	1.56955	0.650355	1.30215e-12	1.1896e-11
115	AT1G02090	227	236	248	659	595	517	AT1G02090	373.628	327.129	420.127	1.28429	0.360966	0.004672	0.0145198
116	AT1G02100	255	205	164	739	774	621	AT1G02100	394.82	284.141	505.498	1.77904	0.831097	1.40039e-10	1.0901e-09
117	AT1G02110	246	246	190	590	561	390	AT1G02110	337.372	312.111	362.633	1.16187	0.216451	0.13379	0.273615
118	AT1G02120	309	192	197	724	643	571	AT1G02120	388.291	316.602	459.979	1.45286	0.5389	0.00245225	0.00805553
119	AT1G02130	176	237	228	633	573	477	AT1G02130	347.543	296.499	398.588	1.34432	0.426872	0.0116374	0.0331144
120	AT1G02140	860	714	690	1632	1682	1451	AT1G02140	1081.15	1031.2	1131.09	1.09687	0.133392	0.110206	0.233655
121	AT1G02145	39	82	58	188	190	159	AT1G02145	106.074	84.2458	127.902	1.51821	0.602367	0.0262158	0.0681666
122	AT1G02150	378	374	306	1387	1387	1094	AT1G02150	699.048	483.685	914.411	1.89051	0.918775	5.52475e-21	8.67318e-20
123	AT1G02160	212	182	195	311	307	253	AT1G02160	238.391	269.979	206.804	0.765999	-0.384586	0.0168001	0.0460658
124	AT1G02170	553	439	517	737	763	546	AT1G02170	585.746	689.173	482.318	0.69985	-0.514882	9.7466e-07	5.21467e-06
125	AT1G02180	16	48	34	52	67	59	AT1G02180	45.0701	47.0237	43.1165	0.916912	-0.125146	0.863403	0.937107
126	AT1G02190	24	14	34	10	4	2	AT1G02190	19.3865	34.3734	4.3996	0.127994	-2.96585	9.85686e-05	0.000408727
127	AT1G02205	193	169	215	477	526	372	AT1G02205	294.939	265.4	324.479	1.22261	0.289959	0.0392143	0.0964702
128	AT1G02210	0	1	0	0	0	0	AT1G02210	1.27976	1.8435	0.716013	0.388399	-1.36439	0.69833	0.878823
129	AT1G02220	78	78	54	220	254	201	AT1G02220	128.707	96.9112	160.502	1.65618	0.72786	0.00109325	0.00382693
130	AT1G02230	12	20	1	10	11	15	AT1G02230	12.8971	16.3449	9.44938	0.578125	-0.790545	0.410519	0.641319
131	AT1G02250	5	6	0	2	1	0	AT1G02250	3.84967	6.31143	1.38792	0.219906	-2.18504	0.132868	0.272383
132	AT1G02260	159	95	183	505	501	471	AT1G02260	276.532	200.849	352.215	1.75363	0.810344	0.000351355	0.00134123
133	AT1G02270	88	62	32	227	192	165	AT1G02270	110.939	83.0634	138.815	1.6712	0.740881	0.0144947	0.040309
134	AT1G02280	238	177	204	719	744	564	AT1G02280	380.937	282.905	478.969	1.69304	0.759613	5.3809e-09	3.62808e-08
135	AT1G02290	15	32	39	147	109	116	AT1G02290	65.3669	41.4516	89.2823	2.15389	1.10695	0.000859959	0.00307357
136	AT1G02300	13	6	19	27	18	18	AT1G02300	17.2136	18.7805	15.6467	0.833133	-0.263382	0.69859	0.878842
137	AT1G02305	383	339	367	1214	1175	1073	AT1G02305	660.861	498.486	823.236	1.65147	0.723753	5.12932e-13	4.85385e-12
138	AT1G02310	15	0	16	0	4	3	AT1G02310	8.88111	15.3609	2.40129	0.156324	-2.67739	0.0506339	0.12032
139	AT1G02320	0	3	0	0	0	0	AT1G02320	1.75116	2.78631	0.716013	0.256976	-1.9603	0.438275	0.662565
140	AT1G02330	175	154	110	134	139	136	AT1G02330	149.39	200.486	98.294	0.490279	-1.02833	2.23568e-06	1.14719e-05
141	AT1G02335	0	0	0	0	0	0	AT1G02335	1.04405	1.37209	0.716013	0.52184	-0.938321	0.86677	0.937107
142	AT1G02340	13	0	9	2	5	3	AT1G02340	7.12011	11.167	3.07319	0.275203	-1.86143	0.106078	0.22658
143	AT1G02350	1	0	5	8	9	2	AT1G02350	4.61136	4.18681	5.03591	1.2028	0.266401	0.860965	0.937107
144	AT1G02360	217	233	211	310	265	273	AT1G02360	253.314	303.788	202.84	0.667703	-0.582722	0.000176971	0.000705759
145	AT1G02370	21	38	17	90	114	83	AT1G02370	52.3894	36.2859	68.4928	1.88759	0.916544	0.00809605	0.0239103
146	AT1G02380	11	10	5	17	11	8	AT1G02380	11.1317	13.1227	9.14065	0.696554	-0.521693	0.514051	0.746319
147	AT1G02390	23	53	27	101	74	67	AT1G02390	53.4587	48.9864	57.9309	1.18259	0.241953	0.558814	0.770792
148	AT1G02391	0	0	0	0	0	0	AT1G02391	1.04405	1.37209	0.716013	0.52184	-0.938321	0.86677	0.937107
149	AT1G02400	339	321	305	1655	1607	1463	AT1G02400	782.485	441.757	1123.21	2.5426	1.3463	7.6739e-46	3.27749e-44
150	AT1G02405	82	93	100	148	187	100	AT1G02405	114.931	127.682	102.179	0.800263	-0.321453	0.207958	0.389703
151	AT1G02410	89	39	49	168	254	165	AT1G02410	109.861	80.7779	138.944	1.72008	0.782475	0.0184186	0.0498603
152	AT1G02420	29	36	12	101	87	70	AT1G02420	48.9533	36.328	61.5786	1.69507	0.761346	0.0367577	0.0914202
153	AT1G02430	27	23	15	36	29	28	AT1G02430	26.7944	30.7909	22.7979	0.74041	-0.433603	0.360618	0.580912
154	AT1G02440	4	0	2	4	0	2	AT1G02440	3.09183	4.01783	2.16583	0.539055	-0.891495	0.585352	0.798528
155	AT1G02450	42	70	58	71	58	38	AT1G02450	59.8148	79.8555	39.7741	0.498076	-1.00556	0.00906777	0.0264968
156	AT1G02460	1	0	2	2	2	0	AT1G02460	2.17862	2.75129	1.60596	0.583711	-0.776673	0.773427	0.937107
157	AT1G02470	29	56	72	62	76	45	AT1G02470	59.0101	74.4665	43.5537	0.584876	-0.773798	0.166998	0.326582
158	AT1G02475	62	66	57	57	58	62	AT1G02475	64.5185	85.935	43.102	0.501565	-0.99549	0.00116663	0.00406499
159	AT1G02490	0	0	0	0	0	0	AT1G02490	1.04405	1.37209	0.716013	0.52184	-0.938321	0.86677	0.937107
160	AT1G02500	973	762	908	3344	3702	2828	AT1G02500	1769.56	1205.85	2333.26	1.93495	0.9523	5.06245e-42	1.91025e-40
161	AT1G02510	0	0	0	0	0	0	AT1G02510	1.04405	1.37209	0.716013	0.52184	-0.938321	0.86677	0.937107
162	AT1G02520	51	51	45	159	115	91	AT1G02520	77.5078	68.4778	86.5377	1.26373	0.337692	0.227366	0.416855
163	AT1G02530	88	26	54	4	6	15	AT1G02530	41.8088	76.62	6.99758	0.0913285	-3.45279	6.52461e-05	0.00027827
164	AT1G02540	0	0	0	0	0	0	AT1G02540	1.04405	1.37209	0.716013	0.52184	-0.938321	0.86677	0.937107
165	AT1G02550	0	0	0	0	0	0	AT1G02550	1.04405	1.37209	0.716013	0.52184	-0.938321	0.86677	0.937107
166	AT1G02560	366	438	396	1249	1387	1012	AT1G02560	706.362	551.855	860.869	1.55996	0.641506	7.32002e-09	4.86084e-08
167	AT1G02570	0	0	2	0	1	0	AT1G02570	1.63158	2.32911	0.934051	0.401034	-1.3182	0.654099	0.863473
168	AT1G02575	2	0	2	0	0	0	AT1G02575	1.94474	3.17347	0.716013	0.225625	-2.148	0.342557	0.558285
169	AT1G02580	2	2	1	4	3	2	AT1G02580	3.22886	3.63777	2.81995	0.775185	-0.367387	0.878988	0.947079
170	AT1G02590	0	0	1	0	0	0	AT1G02590	1.28331	1.8506	0.716013	0.386908	-1.36994	0.698542	0.878823
171	AT1G02610	18	12	12	11	25	11	AT1G02610	16.0075	20.3703	11.6447	0.57165	-0.806796	0.210038	0.391914
172	AT1G02620	237	203	188	487	571	524	AT1G02620	332.421	287.084	377.758	1.31585	0.395992	0.00528536	0.0162515
173	AT1G02630	13	22	31	27	70	39	AT1G02630	32.3708	32.0651	32.6765	1.01907	0.0272492	0.927157	0.980292
174	AT1G02640	17446	17083	16287	29878	31461	24682	AT1G02640	21771.9	23213.2	20330.6	0.87582	-0.191294	1.52585e-05	7.04911e-05
175	AT1G02650	7	2	4	28	13	5	AT1G02650	9.22204	7.1842	11.2599	1.56731	0.648293	0.479266	0.70933
176	AT1G02660	199	125	124	704	732	521	AT1G02660	332.47	203.647	461.294	2.26517	1.17962	9.06446e-16	1.04274e-14
177	AT1G02670	3	7	9	12	31	8	AT1G02670	11.3059	10.245	12.3667	1.20709	0.271539	0.695295	0.878823
178	AT1G02680	55	39	39	90	109	79	AT1G02680	63.9786	61.6386	66.3185	1.07592	0.105576	0.774109	0.937107
179	AT1G02690	23	27	39	178	195	149	AT1G02690	83.2424	42.472	124.013	2.91987	1.54591	3.85585e-08	2.40491e-07
180	AT1G02700	573	533	510	3200	3395	2695	AT1G02700	1468.09	738.579	2197.6	2.97544	1.5731	7.06549e-106	1.12411e-103
181	AT1G02710	14	16	8	15	22	28	AT1G02710	17.5796	18.6532	16.506	0.88489	-0.17643	0.756935	0.927203
182	AT1G02720	63	67	27	174	120	107	AT1G02720	83.9209	72.4733	95.3686	1.31591	0.396064	0.314572	0.532724
183	AT1G02730	30	21	3	16	29	14	AT1G02730	19.9186	25.3725	14.4646	0.57009	-0.810739	0.311052	0.528047
184	AT1G02740	136	131	98	600	575	445	AT1G02740	275.149	167.436	382.862	2.28661	1.19321	1.21563e-14	1.30258e-13
185	AT1G02750	97	58	68	126	146	123	AT1G02750	98.3425	102.204	94.4813	0.924442	-0.113346	0.607166	0.821818
186	AT1G02770	130	116	121	369	357	265	AT1G02770	201.479	168.838	234.12	1.38666	0.47161	0.00679064	0.0203667
187	AT1G02780	3405	3104	2969	9796	10407	8647	AT1G02780	5579.7	4322.83	6836.58	1.58151	0.661299	7.36133e-56	4.31037e-54
188	AT1G02790	9	10	41	4	5	0	AT1G02790	16.1093	29.5046	2.71394	0.0919838	-3.44248	0.0515458	0.122135
189	AT1G02800	16	6	14	2	3	0	AT1G02800	9.73926	17.6545	1.824	0.103316	-3.27486	0.000368194	0.00140138
190	AT1G02810	106	88	96	696	639	556	AT1G02810	291.115	133.544	448.687	3.35986	1.7484	1.6026e-29	3.89637e-28
191	AT1G02813	0	0	0	0	0	0	AT1G02813	1.04405	1.37209	0.716013	0.52184	-0.938321	0.86677	0.937107
192	AT1G02816	173	112	127	342	325	255	AT1G02816	203.141	187.977	218.305	1.16134	0.21579	0.240695	0.436644
193	AT1G02820	8	3	0	0	0	0	AT1G02820	3.43988	6.16376	0.716013	0.116165	-3.10575	0.0505192	0.120094
194	AT1G02830	0	0	0	0	0	0	AT1G02830	1.04405	1.37209	0.716013	0.52184	-0.938321	0.86677	0.937107
195	AT1G02840	509	478	426	1901	2001	1720	AT1G02840	990.02	645.438	1334.6	2.06775	1.04806	1.13143e-35	3.42018e-34
196	AT1G02850	365	359	396	1202	1298	1004	AT1G02850	671.41	514.191	828.629	1.61152	0.688421	2.00887e-12	1.80315e-11
197	AT1G02860	218	254	151	482	452	358	AT1G02860	295.542	285.399	305.684	1.07108	0.0990618	0.654665	0.863792
198	AT1G02870	81	74	87	151	136	158	AT1G02870	109.772	112.083	107.461	0.958761	-0.0607565	0.779673	0.937107
199	AT1G02880	204	186	219	603	720	501	AT1G02880	355.154	279.971	430.336	1.53707	0.620185	2.53765e-06	1.29384e-05
200	AT1G02890	352	243	231	1279	1379	1049	AT1G02890	625.514	375.066	875.961	2.33548	1.22372	2.87641e-31	7.44581e-30
201	AT1G02900	100	68	78	101	93	76	AT1G02900	88.7412	112.969	64.513	0.571067	-0.808269	0.00189579	0.00635496
202	AT1G02910	81	64	64	200	181	203	AT1G02910	118.476	96.3631	140.589	1.45895	0.544931	0.0222515	0.0588886
203	AT1G02920	1413	1382	1468	907	928	768	AT1G02920	1284.44	1951.84	617.044	0.316134	-1.66139	5.15378e-50	2.5173e-48
204	AT1G02930	2612	2350	2527	1284	1290	1081	AT1G02930	2143.73	3421.1	866.364	0.253241	-1.98141	6.32251e-147	1.81063e-144
205	AT1G02940	38	17	21	4	6	1	AT1G02940	19.3403	35.4775	3.20302	0.0902831	-3.4694	1.2855e-07	7.56995e-07
206	AT1G02950	1	8	0	0	0	0	AT1G02950	3.14076	5.56551	0.716013	0.128652	-2.95846	0.18517	0.356477
207	AT1G02960	32	52	52	57	59	55	AT1G02960	52.85	64.2773	41.4228	0.644438	-0.633886	0.0729013	0.165018
208	AT1G02965	1	3	0	4	0	0	AT1G02965	2.41612	3.20849	1.62375	0.506081	-0.982561	0.655181	0.863823
209	AT1G02970	3	3	12	14	16	13	AT1G02970	10.3501	9.79494	10.9052	1.11335	0.154912	0.861838	0.937107
210	AT1G02980	31	16	12	10	6	1	AT1G02980	16.1545	27.7443	4.56463	0.164525	-2.60362	0.000196602	0.000778905
211	AT1G02990	65	27	63	213	194	145	AT1G02990	101.171	71.6878	130.653	1.82253	0.865945	0.00189403	0.00634983
212	AT1G03000	194	185	187	850	822	657	AT1G03000	405.439	259.966	550.911	2.11917	1.0835	1.44218e-17	1.86749e-16
213	AT1G03010	0	1	4	0	0	0	AT1G03010	2.23677	3.75753	0.716013	0.190554	-2.39173	0.263921	0.46775
214	AT1G03020	0	0	0	0	0	0	AT1G03020	1.04405	1.37209	0.716013	0.52184	-0.938321	0.86677	0.937107
215	AT1G03022	0	0	0	0	0	0	AT1G03022	1.04405	1.37209	0.716013	0.52184	-0.938321	0.86677	0.937107
216	AT1G03030	111	84	53	227	331	249	AT1G03030	152.541	113.193	191.89	1.69524	0.761492	0.00597715	0.0181428
217	AT1G03040	248	204	189	630	632	500	AT1G03040	354.841	292.677	417.005	1.42479	0.510753	0.000151408	0.000610344
218	AT1G03050	2	5	0	0	0	0	AT1G03050	2.64475	4.57348	0.716013	0.156558	-2.67523	0.155087	0.309287
219	AT1G03055	4	0	1	4	2	0	AT1G03055	2.79958	3.53933	2.05983	0.581983	-0.78095	0.680137	0.878823
220	AT1G03060	617	485	479	710	750	604	AT1G03060	604.385	719.694	489.077	0.679562	-0.557324	3.8457e-08	2.39913e-07
221	AT1G03070	20	6	2	11	10	0	AT1G03070	9.49692	13.6012	5.39268	0.396486	-1.33466	0.27141	0.47397
222	AT1G03080	176	157	112	364	441	311	AT1G03080	233.524	203.279	263.769	1.29757	0.375809	0.0234898	0.061823
223	AT1G03090	34	40	32	146	151	123	AT1G03090	75.0024	49.8947	100.11	2.00643	1.00463	0.00056814	0.0020947
224	AT1G03100	23	17	6	70	66	65	AT1G03100	35.2884	21.9672	48.6096	2.21283	1.14589	0.0103209	0.0297164
225	AT1G03103	0	0	2	0	3	2	AT1G03103	2.12066	2.32911	1.91221	0.821004	-0.284539	0.990507	1
226	AT1G03106	2003	1948	1852	5483	5862	4835	AT1G03106	3242.56	2651.49	3833.62	1.44583	0.531902	3.09265e-26	6.47719e-25
227	AT1G03110	29	21	28	114	139	109	AT1G03110	61.6752	36.9131	86.4373	2.34164	1.22752	0.000173597	0.000693114
228	AT1G03120	133	96	121	298	404	307	AT1G03120	200.158	160.676	239.639	1.49144	0.576706	0.00123354	0.00428221
229	AT1G03130	99	86	76	31	44	50	AT1G03130	75.486	120.075	30.8967	0.257311	-1.95842	1.42213e-11	1.19415e-10
230	AT1G03140	184	186	161	918	925	791	AT1G03140	434.447	243.774	625.12	2.56434	1.35859	1.46908e-27	3.32512e-26
231	AT1G03150	73	76	82	113	141	71	AT1G03150	91.8013	107.256	76.3469	0.711821	-0.490413	0.0741749	0.167525
232	AT1G03160	152	142	167	495	509	444	AT1G03160	278.383	212.394	344.372	1.62138	0.697226	3.57332e-06	1.78476e-05
233	AT1G03170	4	0	2	0	0	2	AT1G03170	2.63796	4.01783	1.25809	0.313127	-1.67518	0.329949	0.55167
234	AT1G03180	7	15	14	13	15	14	AT1G03180	14.4144	18.0975	10.7313	0.59297	-0.753968	0.284567	0.491021
235	AT1G03190	46	50	36	198	249	177	AT1G03190	104.752	61.5889	147.915	2.40164	1.26402	4.06291e-07	2.26879e-06
236	AT1G03200	8	12	20	50	76	41	AT1G03200	29.8614	19.9765	39.7463	1.98965	0.992513	0.0281283	0.0724128
237	AT1G03210	54	41	61	122	200	139	AT1G03210	91.1853	72.6864	109.684	1.50901	0.593598	0.0320215	0.0810774
238	AT1G03220	2940	3068	2747	4688	5170	4068	AT1G03220	3648.87	4003.31	3294.43	0.822927	-0.281164	0.000430521	0.00161801
239	AT1G03230	1832	1755	1790	4116	4425	3432	AT1G03230	2644.23	2458.65	2829.81	1.15096	0.202837	0.000120116	0.000491412
240	AT1G03240	6	11	4	23	16	23	AT1G03240	13.3314	11.0047	15.6581	1.42286	0.50879	0.507364	0.739059
241	AT1G03250	157	124	114	468	460	360	AT1G03250	242.726	180.659	304.793	1.68712	0.754566	3.66449e-06	1.82761e-05
242	AT1G03260	46	51	52	178	164	124	AT1G03260	90.097	69.7165	110.478	1.58467	0.664183	0.0104399	0.0300147
243	AT1G03270	16	4	8	52	44	32	AT1G03270	22.3121	13.8407	30.7836	2.22414	1.15325	0.041128	0.10056
244	AT1G03280	150	54	114	303	405	250	AT1G03280	185.124	144.705	225.543	1.55864	0.640286	0.0574491	0.134356
245	AT1G03290	89	79	100	283	243	273	AT1G03290	157.977	124.038	191.916	1.54723	0.629692	0.0023995	0.00790134
246	AT1G03300	8	10	17	21	32	20	AT1G03300	17.7389	17.5982	17.8797	1.01599	0.0228903	0.96844	1
247	AT1G03310	119	138	138	416	433	357	AT1G03310	234.496	182.7	286.293	1.56701	0.648018	6.09924e-05	0.000261275
248	AT1G03320	2	4	0	0	2	2	AT1G03320	2.89812	4.10207	1.69417	0.413003	-1.27578	0.459241	0.686376
249	AT1G03330	199	137	146	201	225	193	AT1G03330	183.765	219.831	147.699	0.671877	-0.57373	0.00125492	0.00434921
250	AT1G03340	289	228	167	730	767	657	AT1G03340	411.23	310.773	511.687	1.6465	0.719398	1.25386e-06	6.61351e-06
251	AT1G03350	217	171	141	766	781	638	AT1G03350	379.412	241.065	517.759	2.1478	1.10286	1.09907e-16	1.34448e-15
252	AT1G03360	26	36	16	59	74	75	AT1G03360	43.7717	36.9755	50.568	1.36761	0.451655	0.254655	0.456911
253	AT1G03365	53	49	41	225	164	166	AT1G03365	99.4963	66.4653	132.527	1.99393	0.995615	9.92472e-05	0.00041104
254	AT1G03370	259	231	296	903	885	799	AT1G03370	488.206	361.25	615.163	1.70287	0.767972	2.12012e-10	1.62616e-09
255	AT1G03380	206	225	167	659	812	560	AT1G03380	376.707	274.318	479.095	1.7465	0.804463	2.07302e-08	1.32734e-07
256	AT1G03390	8	7	8	0	1	0	AT1G03390	6.40574	11.8774	0.934051	0.0786408	-3.66858	0.00209055	0.00695131
257	AT1G03400	22	32	32	86	81	69	AT1G03400	48.8263	41.0573	56.5953	1.37845	0.463044	0.185064	0.356348
258	AT1G03410	591	590	513	518	557	435	AT1G03410	566.051	774.484	357.618	0.46175	-1.11482	1.86295e-25	3.76549e-24
259	AT1G03430	70	60	49	154	175	122	AT1G03430	94.7717	82.6559	106.888	1.29316	0.370904	0.152868	0.306187
260	AT1G03440	30	19	18	65	102	61	AT1G03440	42.9237	31.6074	54.2401	1.71606	0.7791	0.0471644	0.113443
261	AT1G03445	20	12	7	5	5	0	AT1G03445	10.8815	18.8221	2.94088	0.156246	-2.67811	0.00125285	0.00434369
262	AT1G03457	3	16	4	7	9	12	AT1G03457	9.80726	12.0951	7.51938	0.621686	-0.685741	0.524245	0.757762
263	AT1G03470	100	86	75	177	230	140	AT1G03470	124.498	120.019	128.978	1.07464	0.10386	0.639621	0.853351
264	AT1G03475	588	527	681	1311	1296	1018	AT1G03475	840.316	823.909	856.724	1.03983	0.0563461	0.650036	0.863266
265	AT1G03490	4	4	3	0	0	0	AT1G03490	3.54899	6.38196	0.716013	0.112193	-3.15594	0.049354	0.117845
266	AT1G03495	33	45	26	75	95	56	AT1G03495	51.2932	48.9585	53.628	1.09538	0.131427	0.689942	0.878823
267	AT1G03510	9	9	11	18	34	22	AT1G03510	16.4275	14.6779	18.177	1.23839	0.308465	0.64187	0.855596
268	AT1G03520	46	53	47	221	217	190	AT1G03520	108.974	68.2667	149.681	2.19258	1.13263	3.13639e-06	1.57936e-05
269	AT1G03530	114	67	89	377	371	295	AT1G03530	185.396	123.672	247.119	1.99818	0.998689	1.07811e-07	6.39855e-07
270	AT1G03540	0	8	13	5	14	10	AT1G03540	9.48877	11.3639	7.61362	0.669981	-0.577807	0.623544	0.836868
271	AT1G03550	67	26	43	167	123	114	AT1G03550	79.411	62.4906	96.3314	1.54153	0.624368	0.0700762	0.159593
272	AT1G03560	86	75	73	240	267	227	AT1G03560	141.444	107.966	174.923	1.62016	0.696139	0.00106608	0.00374147
273	AT1G03590	140	109	108	452	532	414	AT1G03590	247.518	163.539	331.497	2.02702	1.01936	3.68436e-10	2.76058e-09
274	AT1G03600	389	378	323	689	830	694	AT1G03600	512.249	498.349	526.148	1.05578	0.0783098	0.509806	0.741581
275	AT1G03610	680	728	771	1489	1540	1230	AT1G03610	1004.17	1000.57	1007.78	1.00721	0.0103628	0.850816	0.937107
276	AT1G03620	2	1	9	24	31	12	AT1G03620	11.5843	6.99443	16.1741	2.31243	1.20941	0.108522	0.230552
277	AT1G03630	55	24	26	132	131	101	AT1G03630	67.4782	48.347	86.6095	1.79141	0.841099	0.00823904	0.0242904
278	AT1G03650	3	2	3	18	19	14	AT1G03650	8.87755	5.01697	12.7381	2.53901	1.34427	0.144165	0.291415
279	AT1G03660	1	0	0	0	0	0	AT1G03660	1.25514	1.79427	0.716013	0.399054	-1.32534	0.696842	0.878823
280	AT1G03670	2	0	4	0	0	0	AT1G03670	2.42325	4.13049	0.716013	0.173348	-2.52825	0.203298	0.384279
281	AT1G03680	408	303	305	578	535	433	AT1G03680	414.149	462.402	365.895	0.791292	-0.337719	0.00499792	0.015434
282	AT1G03687	48	42	35	204	221	154	AT1G03687	97.5604	58.1835	136.937	2.35354	1.23483	1.83561e-06	9.5087e-06
283	AT1G03700	0	0	1	0	0	0	AT1G03700	1.28331	1.8506	0.716013	0.386908	-1.36994	0.698542	0.878823
284	AT1G03710	28	16	17	10	14	35	AT1G03710	22.1973	28.8703	15.5243	0.537726	-0.895056	0.0808517	0.180196
285	AT1G03720	0	0	0	0	0	0	AT1G03720	1.04405	1.37209	0.716013	0.52184	-0.938321	0.86677	0.937107
286	AT1G03730	201	206	197	243	255	196	AT1G03730	221.095	277.606	164.585	0.592872	-0.754207	7.74933e-06	3.71046e-05
287	AT1G03740	113	99	81	432	396	303	AT1G03740	200.863	134.507	267.22	1.98667	0.99035	3.30154e-08	2.07297e-07
288	AT1G03750	56	77	48	234	241	209	AT1G03750	123.647	84.2808	163.013	1.93417	0.951715	2.65426e-05	0.000118828
289	AT1G03760	32	35	29	37	33	44	AT1G03760	36.7457	45.2578	28.2336	0.62384	-0.680751	0.090643	0.198107
290	AT1G03770	47	25	28	70	78	45	AT1G03770	46.1016	46.3979	45.8052	0.987226	-0.0185484	0.963205	1
291	AT1G03780	30	5	10	5	10	2	AT1G03780	12.8764	21.1796	4.57315	0.215922	-2.21142	0.0656033	0.150896
292	AT1G03790	7007	6840	7220	14501	14961	11683	AT1G03790	9679.48	9638.83	9720.13	1.00843	0.0121176	0.777967	0.937107
293	AT1G03800	19	4	2	4	2	4	AT1G03800	7.69008	12.2362	3.14399	0.256942	-1.96048	0.156698	0.311131
294	AT1G03810	0	0	0	0	0	0	AT1G03810	1.04405	1.37209	0.716013	0.52184	-0.938321	0.86677	0.937107
295	AT1G03820	10	4	0	0	0	0	AT1G03820	4.09777	7.47952	0.716013	0.0957298	-3.38489	0.0372129	0.092382
296	AT1G03830	34	28	29	75	89	75	AT1G03830	50.1359	42.8023	57.4695	1.34267	0.425109	0.244105	0.441476
297	AT1G03840	1	2	8	0	2	3	AT1G03840	4.26518	6.56514	1.96521	0.29934	-1.74014	0.203502	0.384286
298	AT1G03850	857	749	823	1107	969	892	AT1G03850	907.527	1110.08	704.98	0.635074	-0.655004	3.7175e-14	3.83827e-13
299	AT1G03860	202	147	204	526	515	425	AT1G03860	300.565	253.565	347.565	1.37072	0.454931	0.00167582	0.00567562
300	AT1G03870	585	599	589	630	640	475	AT1G03870	612.267	812.56	411.973	0.507007	-0.979924	3.30417e-21	5.25078e-20
301	AT1G03880	19	12	29	256	272	152	AT1G03880	94.1214	28.9271	159.316	5.50749	2.4614	1.8741e-13	1.84267e-12
302	AT1G03890	3	13	4	20	35	16	AT1G03890	13.9518	10.6809	17.2227	1.61247	0.689273	0.302779	0.516225
303	AT1G03900	1244	1083	1123	4346	4563	3501	AT1G03900	2252.63	1574.46	2930.79	1.86146	0.896434	3.12119e-53	1.69491e-51
304	AT1G03905	75	37	38	256	258	197	AT1G03905	118.561	68.6609	168.46	2.45351	1.29485	6.40077e-08	3.89486e-07
305	AT1G03910	167	197	148	608	658	547	AT1G03910	332.991	235.562	430.42	1.82721	0.869639	3.58048e-10	2.68941e-09
306	AT1G03920	2	3	2	0	1	0	AT1G03920	2.76087	4.58768	0.934051	0.2036	-2.29619	0.208365	0.390277
307	AT1G03930	154	109	117	516	569	442	AT1G03930	267.717	173.756	361.678	2.08152	1.05764	1.56834e-11	1.31247e-10
308	AT1G03940	29	29	34	113	113	70	AT1G03940	56.763	43.5553	69.9708	1.60648	0.683903	0.0358328	0.0895113
309	AT1G03950	44	29	35	37	61	43	AT1G03950	42.2171	50.3666	34.0676	0.676394	-0.564064	0.136374	0.278081
310	AT1G03960	50	35	23	141	134	117	AT1G03960	71.8143	49.986	93.6426	1.87338	0.905642	0.00311411	0.0100086
311	AT1G03970	260	159	188	558	530	426	AT1G03970	317.21	276.052	358.369	1.29819	0.376506	0.0188562	0.0508879
312	AT1G03980	202	119	158	390	376	304	AT1G03980	235.977	218.354	253.599	1.16141	0.215881	0.234105	0.426852
313	AT1G03982	3	0	0	0	0	0	AT1G03982	1.67733	2.63864	0.716013	0.271357	-1.88173	0.438633	0.662565
314	AT1G03990	18	34	51	108	124	94	AT1G03990	63.5712	49.403	77.7395	1.57358	0.654049	0.0561209	0.131646
315	AT1G04000	487	445	504	530	538	433	AT1G04000	506.787	657.917	355.656	0.540579	-0.887422	3.29872e-15	3.66755e-14
316	AT1G04010	60	51	47	97	85	79	AT1G04010	67.9543	73.2345	62.6741	0.855801	-0.224653	0.447264	0.672762
317	AT1G04020	13	31	6	61	62	34	AT1G04020	30.8189	24.345	37.2928	1.53184	0.615268	0.28373	0.489981
318	AT1G04030	31	19	41	72	85	72	AT1G04030	49.0693	43.0352	55.1034	1.28043	0.356625	0.324692	0.546462
319	AT1G04040	12	21	27	17	40	30	AT1G04040	25.342	29.2575	21.4266	0.732347	-0.4494	0.418799	0.651263
320	AT1G04050	1	20	7	31	23	20	AT1G04050	16.3793	14.5719	18.1867	1.24806	0.319691	0.664828	0.872519
321	AT1G04070	146	134	119	335	318	291	AT1G04070	204.035	183.121	224.948	1.22841	0.296793	0.0973309	0.210469
322	AT1G04080	364	339	292	2025	2092	1657	AT1G04080	910.042	454.576	1365.51	3.00391	1.58684	1.21834e-70	1.00443e-68
323	AT1G04090	2	6	6	8	14	18	AT1G04090	9.18934	7.91593	10.4627	1.32173	0.402431	0.679082	0.878823
324	AT1G04100	12	19	17	69	71	43	AT1G04100	33.5198	23.5296	43.5099	1.84916	0.886869	0.0381261	0.0942853
325	AT1G04110	3	0	7	10	13	6	AT1G04110	6.71714	5.98819	7.4461	1.24346	0.314364	0.788397	0.937107
326	AT1G04120	351	345	377	1013	1146	831	AT1G04120	599.148	492.59	705.707	1.43265	0.518683	3.70752e-07	2.08059e-06
327	AT1G04130	36	35	46	119	103	101	AT1G04130	66.3177	55.0811	77.5542	1.408	0.493648	0.107219	0.228408
328	AT1G04140	1135	1132	1223	2446	2820	2037	AT1G04140	1661.08	1599.39	1722.77	1.07714	0.10721	0.243335	0.44025
329	AT1G04150	10	4	4	2	4	1	AT1G04150	5.85331	9.39355	2.31307	0.246241	-2.02186	0.0709302	0.161119
330	AT1G04160	25	36	9	53	31	30	AT1G04160	30.4189	33.2038	27.634	0.832254	-0.264905	0.673133	0.878823
331	AT1G04170	477	482	430	2156	2078	1606	AT1G04170	1007.04	635.728	1378.36	2.16816	1.11647	2.87234e-41	1.06755e-39
332	AT1G04171	0	0	0	0	0	0	AT1G04171	1.04405	1.37209	0.716013	0.52184	-0.938321	0.86677	0.937107
333	AT1G04180	2	0	3	10	15	13	AT1G04180	6.71572	3.65198	9.77945	2.67785	1.42108	0.194406	0.371314
334	AT1G04190	116	52	87	229	230	197	AT1G04190	136.358	116.488	156.228	1.34115	0.423466	0.10296	0.221049
335	AT1G04200	72	74	88	212	161	148	AT1G04200	116.403	108.762	124.044	1.14051	0.189684	0.393135	0.62155
336	AT1G04210	230	253	200	970	949	742	AT1G04210	471.157	313.441	628.873	2.00635	1.00458	1.37111e-17	1.78055e-16
337	AT1G04220	73	94	108	162	121	165	AT1G04220	118.383	128.182	108.584	0.847105	-0.239388	0.455463	0.682492
338	AT1G04230	41	70	62	116	120	148	AT1G04230	87.3331	81.3473	93.319	1.14717	0.198076	0.575674	0.788928
339	AT1G04240	15	3	0	16	23	19	AT1G04240	11.8153	9.11902	14.5116	1.59136	0.670256	0.495287	0.727933
340	AT1G04250	21	16	18	73	69	57	AT1G04250	37.0848	26.3935	47.7762	1.81015	0.856108	0.0420289	0.102505
341	AT1G04260	176	185	209	352	332	325	AT1G04260	251.984	262.894	241.074	0.917	-0.125006	0.446989	0.672423
342	AT1G04270	2274	1858	2116	8053	8532	6954	AT1G04270	4211.57	2849.8	5573.34	1.95569	0.967679	1.82656e-92	2.2588e-90
343	AT1G04280	172	119	108	705	713	551	AT1G04280	323.636	181.763	465.509	2.56108	1.35675	8.47902e-21	1.31068e-19
344	AT1G04290	247	156	130	241	288	234	AT1G04290	211.511	241.396	181.626	0.752397	-0.410433	0.117406	0.246327
345	AT1G04300	242	284	233	1132	1213	1006	AT1G04300	571.832	348.911	794.753	2.27781	1.18765	5.28008e-28	1.21737e-26
346	AT1G04310	90	56	85	215	213	138	AT1G04310	119.896	106.44	133.353	1.25284	0.325203	0.148526	0.299029
347	AT1G04330	2	0	2	6	5	4	AT1G04330	3.71272	3.17347	4.25197	1.33985	0.422071	0.850166	0.937107
348	AT1G04340	63	79	113	196	309	219	AT1G04340	145.604	119.282	171.927	1.44135	0.52742	0.0963728	0.208711
349	AT1G04350	25	15	15	40	48	25	AT1G04350	26.6053	26.1753	27.0352	1.03285	0.0466345	0.962508	1
350	AT1G04360	4	6	0	14	13	2	AT1G04360	6.57946	5.88925	7.26968	1.2344	0.303808	0.802078	0.937107
351	AT1G04370	0	0	0	0	0	2	AT1G04370	1.31509	1.37209	1.25809	0.916916	-0.125139	1	1
352	AT1G04380	56	26	31	60	89	65	AT1G04380	51.7298	52.1045	51.3551	0.985617	-0.0209003	0.908812	0.96677
353	AT1G04390	64	49	95	246	280	190	AT1G04390	133.02	96.9487	169.09	1.74412	0.8025	0.00155202	0.00528791
354	AT1G04400	513	494	424	2778	2921	2321	AT1G04400	1275.41	653.712	1897.11	2.90206	1.53708	7.17963e-90	8.49257e-88
355	AT1G04410	16785	15705	15789	46894	48703	38724	AT1G04410	26901.9	22046.2	31757.5	1.44049	0.526563	3.28375e-71	2.74042e-69
356	AT1G04420	118	69	60	207	254	240	AT1G04420	140.275	112.427	168.123	1.4954	0.580529	0.0464728	0.112077
357	AT1G04430	275	279	259	831	882	722	AT1G04430	475.113	372.927	577.299	1.54802	0.630426	5.3941e-08	3.30895e-07
358	AT1G04440	252	171	210	712	763	704	AT1G04440	404.164	288.859	519.469	1.79835	0.846674	1.14238e-09	8.17238e-09
359	AT1G04445	5	6	0	6	4	10	AT1G04445	5.9858	6.31143	5.66018	0.896814	-0.157119	0.890809	0.955871
360	AT1G04450	31	5	105	3	1	0	AT1G04450	34.3374	67.06	1.61486	0.0240808	-5.37598	0.0357057	0.0892504
361	AT1G04470	10	0	0	0	2	0	AT1G04470	3.373	5.59391	1.15209	0.205954	-2.2796	0.309136	0.525422
362	AT1G04480	962	696	752	2135	2135	1764	AT1G04480	1262.15	1095.45	1428.85	1.30435	0.383335	9.04579e-06	4.29643e-05
363	AT1G04490	345	310	416	836	882	731	AT1G04490	536.546	492.219	580.873	1.18011	0.238923	0.106817	0.227713
364	AT1G04500	1	0	1	0	2	1	AT1G04500	1.84796	2.27278	1.42313	0.626162	-0.675393	0.82856	0.937107
365	AT1G04501	0	0	0	0	0	0	AT1G04501	1.04405	1.37209	0.716013	0.52184	-0.938321	0.86677	0.937107
366	AT1G04510	175	157	181	672	718	556	AT1G04510	348.17	235.874	460.466	1.95217	0.965077	1.22973e-12	1.12533e-11
367	AT1G04520	30	48	16	121	95	94	AT1G04520	59.3438	44.3211	74.3665	1.6779	0.746661	0.051147	0.121338
368	AT1G04530	229	232	245	759	766	626	AT1G04530	417.15	324.652	509.648	1.56983	0.650608	1.14907e-07	6.80342e-07
369	AT1G04540	16	33	23	73	43	89	AT1G04540	42.7347	34.689	50.7805	1.46388	0.549795	0.326324	0.548632
370	AT1G04550	135	90	117	262	255	196	AT1G04550	162.837	156.778	168.897	1.07729	0.107413	0.601754	0.815752
371	AT1G04555	48	29	19	34	30	23	AT1G04555	32.803	44.3992	21.2069	0.477641	-1.066	0.0180159	0.0489162
372	AT1G04560	2175	1927	1756	8819	9411	7874	AT1G04560	4428.23	2668.27	6188.18	2.31917	1.21361	1.09363e-138	2.94587e-136
373	AT1G04570	20	28	21	60	51	39	AT1G04570	34.5432	33.0637	36.0226	1.08949	0.123655	0.766807	0.935547
374	AT1G04580	18	21	10	25	27	16	AT1G04580	20.1345	23.6559	16.6131	0.702279	-0.509884	0.382369	0.607992
375	AT1G04590	60	51	63	164	181	153	AT1G04590	99.879	80.8906	118.867	1.46948	0.555309	0.0268107	0.0694798
376	AT1G04600	14	2	3	12	10	2	AT1G04600	7.91133	9.66096	6.16169	0.637793	-0.64884	0.530186	0.761616
377	AT1G04610	12	4	9	17	14	15	AT1G04610	12.1612	12.6305	11.692	0.925702	-0.11138	0.886645	0.953668
378	AT1G04620	14	15	33	96	127	80	AT1G04620	51.0101	30.1444	71.8758	2.38438	1.25361	0.00035223	0.00134419
379	AT1G04625	30	22	15	30	36	23	AT1G04625	26.5967	31.586	21.6074	0.684079	-0.547765	0.255105	0.457448
380	AT1G04630	243	288	244	653	664	649	AT1G04630	413.035	356.482	469.587	1.31728	0.397561	0.00937462	0.0272689
381	AT1G04635	8	16	11	40	32	30	AT1G04635	21.2287	17.5556	24.9018	1.41846	0.504321	0.358675	0.578499
382	AT1G04640	39	37	5	70	84	40	AT1G04640	41.715	37.6717	45.7583	1.21466	0.280552	0.667672	0.875491
383	AT1G04645	28	23	14	10	8	2	AT1G04645	18.0032	30.7346	5.27175	0.171525	-2.54351	5.82826e-05	0.000250574
384	AT1G04650	20	6	6	22	17	18	AT1G04650	14.9046	15.5152	14.294	0.921288	-0.118277	0.819536	0.937107
385	AT1G04660	327	244	261	302	365	261	AT1G04660	299.457	379.339	219.576	0.578838	-0.788768	3.68296e-08	2.29919e-07
386	AT1G04670	2	0	0	0	0	0	AT1G04670	1.46623	2.21646	0.716013	0.323044	-1.6302	0.555354	0.768536
387	AT1G04680	68	57	79	213	200	154	AT1G04680	114.577	94.7526	134.401	1.41844	0.504306	0.0280434	0.0722217
388	AT1G04684	0	0	0	0	0	0	AT1G04684	1.04405	1.37209	0.716013	0.52184	-0.938321	0.86677	0.937107
389	AT1G04690	567	589	508	2051	2340	1662	AT1G04690	1094.16	761.488	1426.84	1.87375	0.905928	2.32069e-23	4.19512e-22
390	AT1G04700	19	44	19	67	74	63	AT1G04700	44.179	39.227	49.131	1.25248	0.324787	0.442748	0.667298
391	AT1G04710	128	94	101	341	327	321	AT1G04710	192.228	148.053	236.403	1.59675	0.67514	0.000265667	0.00103253
392	AT1G04730	18	6	11	66	37	38	AT1G04730	25.562	17.0634	34.0607	1.99613	0.997204	0.0572772	0.134011
393	AT1G04750	468	512	468	1050	1091	864	AT1G04750	687.655	664.254	711.056	1.07046	0.0982288	0.275971	0.479573
394	AT1G04760	1	1	5	2	0	3	AT1G04760	3.32061	4.65822	1.983	0.4257	-1.23209	0.441203	0.665523
395	AT1G04770	221	196	192	344	364	277	AT1G04770	256.084	278.943	233.226	0.836105	-0.258244	0.0992049	0.214034
396	AT1G04778	0	0	0	3	0	0	AT1G04778	1.38446	1.37209	1.39682	1.01802	0.0257657	1	1
397	AT1G04780	420	357	377	1496	1648	1242	AT1G04780	781.773	527.377	1036.17	1.96476	0.974353	1.0543e-25	2.14856e-24
398	AT1G04790	60	56	56	254	213	196	AT1G04790	118.911	79.898	157.923	1.97656	0.982993	2.32663e-05	0.000104833
399	AT1G04800	15	48	10	9	8	2	AT1G04800	20.0811	35.1173	5.04481	0.143656	-2.79931	0.0621096	0.143876
400	AT1G04810	751	618	582	2204	2434	1894	AT1G04810	1216.59	888.25	1544.94	1.7393	0.798509	1.01459e-25	2.07074e-24
401	AT1G04820	4780	4291	4367	8456	8749	6905	AT1G04820	5915.33	6131.84	5698.82	0.929383	-0.105655	0.0110833	0.0316968
402	AT1G04830	54	62	58	263	274	193	AT1G04830	126.802	81.1504	172.453	2.1251	1.08753	1.06303e-06	5.66408e-06
403	AT1G04840	1	2	1	7	8	5	AT1G04840	4.30983	3.21559	5.40406	1.68058	0.74896	0.615872	0.829271
404	AT1G04850	612	509	540	2037	2182	1709	AT1G04850	1080.02	758.086	1401.95	1.84933	0.887	1.83227e-28	4.30102e-27
405	AT1G04860	214	221	244	949	1012	836	AT1G04860	487.988	312.655	663.321	2.12157	1.08514	8.06369e-21	1.25003e-19
406	AT1G04870	63	60	66	412	503	365	AT1G04870	195.326	87.8353	302.816	3.44754	1.78557	2.12554e-21	3.4177e-20
407	AT1G04880	7	4	4	6	3	2	AT1G04880	5.70041	8.12701	3.27382	0.402832	-1.31175	0.246175	0.444432
408	AT1G04890	0	4	0	0	0	0	AT1G04890	1.98686	3.25771	0.716013	0.21979	-2.1858	0.341857	0.558285
409	AT1G04900	56	29	46	99	118	93	AT1G04900	67.4071	60.6963	74.1178	1.22112	0.288211	0.37422	0.597969
410	AT1G04910	100	114	100	648	546	524	AT1G04910	277.012	145.181	408.844	2.81609	1.4937	5.64243e-21	8.84772e-20
411	AT1G04920	411	361	420	3742	4033	3273	AT1G04920	1581.2	546.039	2616.37	4.79154	2.26049	2.07132e-212	1.19898e-209
412	AT1G04930	74	65	57	155	96	99	AT1G04930	87.0926	90.5297	83.6556	0.924067	-0.11393	0.66313	0.870628
413	AT1G04940	205	282	278	725	762	600	AT1G04940	423.947	353.88	494.013	1.39599	0.481287	0.0029056	0.00940172
414	AT1G04945	198	257	279	705	771	601	AT1G04945	415.663	339.619	491.708	1.44782	0.533885	0.00100057	0.00352746
415	AT1G04950	65	25	21	289	290	196	AT1G04950	116.651	50.6476	182.655	3.60639	1.85055	6.17153e-11	4.95727e-10
416	AT1G04960	92	74	64	185	205	187	AT1G04960	121.901	105.721	138.081	1.30609	0.385253	0.103217	0.221548
417	AT1G04970	90	63	65	230	230	255	AT1G04970	136.172	100.17	172.175	1.71883	0.781427	0.000693602	0.00252039
418	AT1G04980	117	94	94	352	377	299	AT1G04980	191.949	140.059	243.838	1.74097	0.799891	1.22086e-05	5.70993e-05
419	AT1G04985	121	153	114	271	308	205	AT1G04985	182.033	179.131	184.934	1.0324	0.0459996	0.749204	0.920055
420	AT1G04990	176	203	157	563	618	480	AT1G04990	319.912	246.497	393.327	1.59567	0.674161	1.44452e-06	7.56055e-06
421	AT1G05000	376	306	402	852	919	719	AT1G05000	543.021	496.722	589.319	1.18642	0.246611	0.0387747	0.0955623
422	AT1G05010	44	33	31	35	28	31	AT1G05010	36.7521	50.3382	23.166	0.460209	-1.11964	0.00569607	0.0173925
423	AT1G05020	121	104	63	508	453	470	AT1G05020	236.894	131.628	342.159	2.59944	1.3782	1.33075e-10	1.03916e-09
424	AT1G05030	44	28	48	70	102	69	AT1G05030	56.8294	56.1158	57.5431	1.02544	0.036237	0.926074	0.979752
425	AT1G05040	0	0	0	0	0	0	AT1G05040	1.04405	1.37209	0.716013	0.52184	-0.938321	0.86677	0.937107
426	AT1G05055	35	40	58	205	244	204	AT1G05055	109.245	62.7581	155.731	2.48145	1.31118	6.70067e-08	4.06825e-07
427	AT1G05060	58	49	45	98	131	84	AT1G05060	72.3881	70.4903	74.286	1.05385	0.0756659	0.809328	0.937107
428	AT1G05065	2	1	1	1	5	4	AT1G05065	3.14183	3.16637	3.1173	0.984503	-0.0225327	1	1
429	AT1G05070	32	49	19	77	71	61	AT1G05070	48.6383	47.0724	50.2042	1.06653	0.0929266	0.831682	0.937107
430	AT1G05080	0	4	0	2	6	0	AT1G05080	2.86791	3.25771	2.47811	0.76069	-0.394619	0.929335	0.981921
431	AT1G05085	0	0	0	2	0	0	AT1G05085	1.27099	1.37209	1.16988	0.852627	-0.230014	1	1
432	AT1G05090	46	41	43	240	249	189	AT1G05090	110.697	60.6958	160.698	2.6476	1.40469	8.98888e-09	5.93283e-08
433	AT1G05100	23	37	23	145	84	78	AT1G05100	56.3039	39.5299	73.0779	1.84867	0.886491	0.0328816	0.0830002
434	AT1G05120	92	75	47	317	363	291	AT1G05120	164.366	98.058	230.675	2.35243	1.23415	1.0067e-09	7.24094e-09
435	AT1G05136	0	0	0	0	0	0	AT1G05136	1.04405	1.37209	0.716013	0.52184	-0.938321	0.86677	0.937107
436	AT1G05140	167	143	145	378	355	277	AT1G05140	223.825	208.671	238.979	1.14524	0.195655	0.239951	0.435498
437	AT1G05150	193	188	179	752	768	732	AT1G05150	397.178	257.13	537.226	2.08932	1.06303	1.94807e-16	2.33682e-15
438	AT1G05160	20	24	23	90	131	95	AT1G05160	53.7935	32.1351	75.4519	2.34796	1.23141	0.00038828	0.00147084
439	AT1G05170	21	25	35	198	198	192	AT1G05170	89.8156	38.7708	140.86	3.63316	1.86122	2.05033e-11	1.69858e-10
440	AT1G05180	169	134	131	618	613	467	AT1G05180	299.884	198.573	401.195	2.02039	1.01463	6.10228e-12	5.27881e-11
441	AT1G05190	372	338	323	939	805	738	AT1G05190	530.836	472.316	589.356	1.2478	0.319387	0.00397259	0.0125366
442	AT1G05200	67	17	18	40	49	15	AT1G05200	35.4141	46.2852	24.5429	0.530253	-0.915248	0.305911	0.520683
443	AT1G05205	258	275	232	265	283	211	AT1G05205	265.346	350.945	179.748	0.512183	-0.965269	3.89303e-10	2.90812e-09
444	AT1G05210	12	8	8	17	15	24	AT1G05210	14.1935	14.0376	14.3494	1.02222	0.031702	1	1
445	AT1G05220	16	8	7	26	21	8	AT1G05220	14.3056	15.2478	13.3634	0.876419	-0.190308	0.807461	0.937107
446	AT1G05230	62	49	31	99	102	60	AT1G05230	63.5824	65.4799	61.6849	0.942043	-0.0861355	0.788463	0.937107
447	AT1G05240	5	2	1	3	1	0	AT1G05240	3.25959	4.90432	1.61486	0.329272	-1.60265	0.31111	0.528113
448	AT1G05250	6	0	4	3	7	0	AT1G05250	4.37115	5.81921	2.92308	0.502316	-0.993333	0.476306	0.70614
449	AT1G05260	115	103	89	28	11	5	AT1G05260	75.9443	141.065	10.8238	0.0767294	-3.70408	2.79865e-29	6.70839e-28
450	AT1G05270	280	174	255	665	776	589	AT1G05270	402.047	323.627	480.468	1.48464	0.57011	0.000333653	0.00127832
451	AT1G05280	7	16	10	4	13	12	AT1G05280	12.1828	16.6549	7.71073	0.46297	-1.11101	0.136088	0.277583
452	AT1G05290	0	3	0	0	0	0	AT1G05290	1.75116	2.78631	0.716013	0.256976	-1.9603	0.438275	0.662565
453	AT1G05291	3	4	0	0	1	0	AT1G05291	2.72915	4.52426	0.934051	0.206454	-2.27611	0.208802	0.390718
454	AT1G05300	158	180	141	173	170	165	AT1G05300	171.081	220.399	121.764	0.55247	-0.856033	5.89694e-06	2.8623e-05
455	AT1G05310	0	3	0	0	0	0	AT1G05310	1.75116	2.78631	0.716013	0.256976	-1.9603	0.438275	0.662565
456	AT1G05320	35	28	44	20	24	36	AT1G05320	35.3236	50.4021	20.2451	0.401671	-1.31591	0.00151019	0.00515512
457	AT1G05330	49	48	47	100	101	92	AT1G05330	68.7716	67.1762	70.367	1.0475	0.0669486	0.847624	0.937107
458	AT1G05340	111	107	118	298	344	268	AT1G05340	185.562	155.138	215.986	1.39222	0.477385	0.00851207	0.0250329
459	AT1G05350	79	58	67	221	272	234	AT1G05350	133.862	94.1259	173.598	1.84432	0.88309	6.2688e-05	0.000268075
460	AT1G05360	61	50	27	147	136	133	AT1G05360	81.696	63.6151	99.777	1.56845	0.649338	0.0248466	0.0650289
461	AT1G05370	4	3	0	7	3	10	AT1G05370	5.07205	4.47503	5.66907	1.26682	0.341215	0.896742	0.95839
462	AT1G05380	215	162	211	771	802	693	AT1G05380	403.927	269.474	538.38	1.9979	0.998481	5.39119e-15	5.93816e-14
463	AT1G05385	26	20	26	16	20	20	AT1G05385	24.1733	34.2181	14.1285	0.412897	-1.27615	0.0121375	0.0343937
464	AT1G05400	34	31	39	43	52	37	AT1G05400	40.4211	49.0016	31.8407	0.649789	-0.621958	0.120917	0.252294
465	AT1G05410	71	32	35	167	224	162	AT1G05410	97.2714	63.1797	131.363	2.0792	1.05603	0.000164856	0.000661028
466	AT1G05420	0	0	3	1	0	0	AT1G05420	1.87528	2.80762	0.942948	0.335854	-1.5741	0.529685	0.761299
467	AT1G05430	60	68	58	178	203	192	AT1G05430	111.962	86.5119	137.412	1.58836	0.667536	0.00507864	0.0156655
468	AT1G05440	2	4	0	0	1	1	AT1G05440	2.65358	4.10207	1.20509	0.293776	-1.76721	0.329981	0.55167
469	AT1G05450	2	2	0	0	3	1	AT1G05450	2.40022	3.15926	1.64117	0.519477	-0.944867	0.654076	0.863473
470	AT1G05460	72	40	48	189	190	191	AT1G05460	105.198	73.5937	136.803	1.85889	0.894442	0.0004173	0.00157201
471	AT1G05470	8	0	0	34	14	5	AT1G05470	8.79454	4.74954	12.8395	2.70332	1.43473	0.287686	0.495711
472	AT1G05490	124	78	43	17	12	17	AT1G05490	61.433	111.068	11.798	0.106224	-3.23482	1.19834e-05	5.61523e-05
473	AT1G05500	137	107	95	412	413	302	AT1G05500	210.613	155.109	266.117	1.71567	0.778774	8.17144e-06	3.89748e-05
474	AT1G05510	73	73	80	581	491	406	AT1G05510	227.274	104.884	349.664	3.3338	1.73717	1.60855e-23	2.93313e-22
475	AT1G05520	606	637	477	1621	1703	1431	AT1G05520	956.751	785.747	1127.75	1.43526	0.521317	7.09416e-07	3.86626e-06
476	AT1G05530	3	2	3	5	17	5	AT1G05530	5.96475	5.01697	6.91253	1.37783	0.462398	0.7069	0.886493
477	AT1G05540	9	0	0	0	8	0	AT1G05540	3.81602	5.17172	2.46032	0.475724	-1.0718	0.570528	0.783454
478	AT1G05550	2	2	0	0	0	0	AT1G05550	1.93764	3.15926	0.716013	0.226639	-2.14153	0.342676	0.558285
479	AT1G05560	375	334	382	1081	1109	904	AT1G05560	616.393	499.929	732.857	1.46592	0.551809	6.50836e-08	3.95856e-07
480	AT1G05570	2031	1697	1784	5690	5808	4717	AT1G05570	3174.65	2512.45	3836.84	1.52713	0.610821	3.83294e-33	1.06734e-31
481	AT1G05575	401	402	393	511	576	439	AT1G05575	454.741	548.225	361.256	0.658956	-0.601745	4.08642e-07	2.28051e-06
482	AT1G05577	2	1	9	1	2	4	AT1G05577	4.72881	6.99443	2.46318	0.352164	-1.50568	0.27568	0.479273
483	AT1G05580	5	7	4	0	0	0	AT1G05580	4.70644	8.69686	0.716013	0.0823301	-3.60244	0.0105502	0.0302996
484	AT1G05590	56	74	78	219	221	175	AT1G05590	121.627	97.2218	146.033	1.50206	0.586945	0.00772898	0.0229107
485	AT1G05600	36	47	23	117	167	100	AT1G05600	70.258	49.7323	90.7838	1.82545	0.868251	0.00389018	0.0122951
486	AT1G05610	6	2	10	0	0	1	AT1G05610	5.31006	9.63307	0.987053	0.102465	-3.28679	0.00969014	0.0280935
487	AT1G05615	0	0	0	0	0	0	AT1G05615	1.04405	1.37209	0.716013	0.52184	-0.938321	0.86677	0.937107
488	AT1G05620	156	115	120	522	544	501	AT1G05620	276.222	178.865	373.58	2.08862	1.06255	7.94416e-12	6.80292e-11
489	AT1G05630	29	24	10	54	66	32	AT1G05630	32.8742	29.7141	36.0343	1.2127	0.278221	0.550636	0.768536
490	AT1G05640	15	10	11	94	64	51	AT1G05640	33.7539	17.6824	49.8254	2.81779	1.49456	0.0009077	0.00322682
491	AT1G05650	2	0	0	0	0	0	AT1G05650	1.46623	2.21646	0.716013	0.323044	-1.6302	0.555354	0.768536
492	AT1G05660	0	2	0	0	0	0	AT1G05660	1.51546	2.3149	0.716013	0.309306	-1.69289	0.55626	0.768536
493	AT1G05670	38	17	9	77	84	81	AT1G05670	44.0974	29.7354	58.4594	1.96599	0.975254	0.0208133	0.0554708
494	AT1G05675	16	20	31	6	9	16	AT1G05675	20.3827	32.3888	8.37661	0.258627	-1.95106	0.00115373	0.00402365
495	AT1G05680	261	270	242	846	809	668	AT1G05680	452.395	354.639	550.151	1.5513	0.633473	8.96202e-08	5.36932e-07
496	AT1G05690	25	27	11	45	30	33	AT1G05690	28.1658	29.9181	26.4136	0.882861	-0.179742	0.69701	0.878823
497	AT1G05700	0	1	1	4	1	2	AT1G05700	2.35294	2.32201	2.38387	1.02664	0.0379352	1	1
498	AT1G05710	33	13	7	13	4	25	AT1G05710	18.0481	24.7819	11.3143	0.456556	-1.13114	0.188152	0.361159
499	AT1G05720	179	118	88	182	205	137	AT1G05720	149.263	174.677	123.848	0.709014	-0.496113	0.0932744	0.20314
500	AT1G05730	50	32	24	42	62	37	AT1G05730	41.4222	49.0503	33.7941	0.688969	-0.537489	0.154798	0.308937
501	AT1G05740	0	0	0	0	0	0	AT1G05740	1.04405	1.37209	0.716013	0.52184	-0.938321	0.86677	0.937107
502	AT1G05750	51	33	32	124	117	122	AT1G05750	70.6026	53.7719	87.4333	1.626	0.70133	0.0243016	0.0637559
503	AT1G05760	0	0	0	2	8	2	AT1G05760	2.41418	1.37209	3.45627	2.51897	1.33284	0.536909	0.768536
504	AT1G05770	0	0	2	2	0	0	AT1G05770	1.7495	2.32911	1.16988	0.502288	-0.993413	0.745206	0.917172
505	AT1G05780	65	75	60	126	119	87	AT1G05780	85.8582	92.8797	78.8368	0.848806	-0.236493	0.408283	0.640549
506	AT1G05785	52	63	74	105	75	77	AT1G05785	75.1003	88.4336	61.7671	0.698458	-0.517755	0.0789428	0.176578
507	AT1G05790	95	49	101	294	328	267	AT1G05790	162.113	112.907	211.319	1.87161	0.904283	4.007e-05	0.00017549
508	AT1G05800	1	4	6	5	14	6	AT1G05800	6.5402	6.55094	6.52946	0.996721	-0.0047381	1	1
509	AT1G05805	36	74	66	122	138	113	AT1G05805	86.0775	83.0361	89.1189	1.07325	0.101993	0.705382	0.885258
510	AT1G05810	220	161	193	647	749	505	AT1G05810	355.114	262.5	447.729	1.70563	0.770307	9.10343e-09	6.00553e-08
511	AT1G05820	5	3	8	10	8	16	AT1G05820	8.89579	8.72527	9.06631	1.03909	0.0553152	1	1
512	AT1G05830	99	72	45	301	294	230	AT1G05830	147.054	98.642	195.466	1.98157	0.986643	3.47883e-06	1.74044e-05
513	AT1G05835	15	7	10	11	33	19	AT1G05835	15.6735	15.7897	15.5573	0.985281	-0.0213928	0.992409	1
514	AT1G05840	109	86	54	296	302	284	AT1G05840	162.241	113.77	210.712	1.85208	0.889149	1.48607e-05	6.8735e-05
515	AT1G05850	1147	948	986	2229	2458	1856	AT1G05850	1474.93	1404.31	1545.54	1.10057	0.138247	0.0450178	0.108993
516	AT1G05860	48	39	56	108	115	95	AT1G05860	71.4331	66.818	76.0482	1.13814	0.186677	0.52917	0.761299
517	AT1G05870	114	116	142	318	338	291	AT1G05870	198.791	172.132	225.451	1.30976	0.3893	0.0251771	0.0658054
518	AT1G05880	0	0	1	0	1	2	AT1G05880	1.66337	1.8506	1.47613	0.79765	-0.326173	0.98477	1
519	AT1G05890	264	183	217	1278	1285	994	AT1G05890	571.631	302.931	840.332	2.774	1.47197	1.63591e-40	5.88711e-39
520	AT1G05894	2	5	2	13	3	10	AT1G05894	6.28059	5.53049	7.03069	1.27126	0.346257	0.809916	0.937107
521	AT1G05900	20	23	16	56	43	28	AT1G05900	29.3516	28.3141	30.3891	1.07328	0.102032	0.829933	0.937107
522	AT1G05910	127	123	80	525	585	373	AT1G05910	249.88	151.252	348.507	2.30414	1.20423	5.62177e-11	4.52771e-10
523	AT1G05920	6	0	0	0	1	0	AT1G05920	2.41962	3.90518	0.934051	0.239183	-2.06382	0.267399	0.468318
524	AT1G05925	0	1	0	0	0	0	AT1G05925	1.27976	1.8435	0.716013	0.388399	-1.36439	0.69833	0.878823
525	AT1G05930	0	0	0	0	0	2	AT1G05930	1.31509	1.37209	1.25809	0.916916	-0.125139	1	1
526	AT1G05940	459	481	471	618	637	530	AT1G05940	535.39	647.276	423.503	0.654286	-0.612008	2.49319e-08	1.58462e-07
527	AT1G05950	16	6	14	7	6	21	AT1G05950	13.4796	17.6545	9.30463	0.527039	-0.924017	0.149857	0.301176
528	AT1G05960	266	172	212	896	978	823	AT1G05960	468.277	296.197	640.357	2.16193	1.11232	2.32543e-20	3.52259e-19
529	AT1G05970	13	20	24	35	55	71	AT1G05970	33.8337	27.7727	39.8947	1.43647	0.522528	0.329126	0.55167
530	AT1G05990	0	0	0	0	0	0	AT1G05990	1.04405	1.37209	0.716013	0.52184	-0.938321	0.86677	0.937107
531	AT1G06000	1272	1139	998	3702	3979	3264	AT1G06000	2072.97	1552.87	2593.08	1.66986	0.739731	2.69593e-34	7.72871e-33
532	AT1G06010	78	77	38	109	168	123	AT1G06010	92.102	88.7837	95.4202	1.07475	0.104001	0.796569	0.937107
533	AT1G06020	2	0	0	1	2	6	AT1G06020	2.61086	2.21646	3.00527	1.35589	0.439238	0.951276	0.998126
534	AT1G06030	4	2	1	1	0	0	AT1G06030	2.71254	4.48213	0.942948	0.210379	-2.24894	0.209031	0.390978
535	AT1G06040	912	751	722	3134	3284	2704	AT1G06040	1623.38	1085.91	2160.86	1.98991	0.992703	8.13903e-49	3.83098e-47
536	AT1G06050	26	31	21	62	69	51	AT1G06050	40.3323	37.011	43.6536	1.17948	0.238148	0.553706	0.768536
537	AT1G06060	80	54	52	141	211	208	AT1G06060	110.291	85.4848	135.096	1.58035	0.660247	0.0490165	0.117163
538	AT1G06070	185	185	186	672	618	593	AT1G06070	352.189	255.688	448.691	1.75484	0.811337	2.01552e-09	1.41581e-08
539	AT1G06080	70	70	61	173	132	98	AT1G06080	94.2154	93.1121	95.3187	1.0237	0.0337914	0.881874	0.949564
540	AT1G06090	0	2	2	0	0	0	AT1G06090	1.99397	3.27192	0.716013	0.218836	-2.19208	0.341739	0.558285
541	AT1G06100	0	0	0	3	1	5	AT1G06100	2.17108	1.37209	2.97006	2.16462	1.11411	0.676505	0.878823
542	AT1G06110	423	401	404	1349	1333	1116	AT1G06110	731.141	562.305	899.977	1.60051	0.678535	8.47629e-13	7.85978e-12
543	AT1G06120	0	1	0	2	0	0	AT1G06120	1.50669	1.8435	1.16988	0.6346	-0.656081	0.89219	0.956007
544	AT1G06130	105	111	145	553	560	419	AT1G06130	264.644	167.411	361.878	2.16162	1.11211	6.55417e-13	6.15296e-12
545	AT1G06135	103	70	61	52	56	61	AT1G06135	74.1521	107.044	41.2602	0.385451	-1.37538	1.21234e-06	6.41317e-06
546	AT1G06137	1	3	2	1	1	0	AT1G06137	2.66324	4.1655	1.16099	0.278714	-1.84314	0.329999	0.55167
547	AT1G06140	9	16	22	73	102	63	AT1G06140	39.9195	23.2414	56.5977	2.43521	1.28405	0.00123753	0.00429497
548	AT1G06148	8	0	18	0	3	0	AT1G06148	7.3664	13.3627	1.37013	0.102534	-3.28583	0.0864355	0.19075
549	AT1G06149	51	25	50	163	239	188	AT1G06149	99.6934	58.6138	140.773	2.4017	1.26406	1.48387e-05	6.86566e-05
550	AT1G06150	67	43	56	231	303	223	AT1G06150	128.185	76.7251	179.645	2.34142	1.22738	6.32478e-08	3.84948e-07
551	AT1G06160	2	0	8	7	13	6	AT1G06160	6.4049	6.04452	6.76529	1.11924	0.162525	0.904591	0.963749
552	AT1G06170	8	21	6	34	36	16	AT1G06170	19.0689	17.5201	20.6178	1.17681	0.234881	0.689667	0.878823
553	AT1G06180	4	4	0	0	15	0	AT1G06180	4.46651	4.94644	3.98658	0.80595	-0.311238	0.900753	0.96094
554	AT1G06190	255	278	159	735	735	588	AT1G06190	401.652	316.161	487.143	1.5408	0.623683	0.000754202	0.00272169
555	AT1G06200	277	235	214	515	546	446	AT1G06200	344.509	331.497	357.52	1.0785	0.109029	0.449026	0.675002
556	AT1G06210	203	152	201	642	641	459	AT1G06210	332.743	254.908	410.578	1.61069	0.687678	5.50611e-07	3.03483e-06
557	AT1G06220	287	235	256	1210	1178	988	AT1G06220	577.88	355.816	799.944	2.24819	1.16877	3.57158e-27	7.92565e-26
558	AT1G06225	2	0	0	0	0	0	AT1G06225	1.46623	2.21646	0.716013	0.323044	-1.6302	0.555354	0.768536
559	AT1G06230	256	227	234	1256	1129	943	AT1G06230	557.966	328.43	787.502	2.39778	1.2617	2.4205e-30	6.01389e-29
560	AT1G06240	89	64	85	158	151	116	AT1G06240	105.363	109.789	100.936	0.919363	-0.121294	0.630822	0.844094
561	AT1G06250	20	6	5	41	26	18	AT1G06250	17.8024	15.0367	20.5681	1.36786	0.451919	0.536888	0.768536
562	AT1G06260	4	3	3	35	16	30	AT1G06260	13.0946	5.91055	20.2786	3.43091	1.77859	0.0199522	0.0534744
563	AT1G06270	200	200	118	463	482	371	AT1G06270	273.995	236.553	311.437	1.31656	0.396777	0.0412599	0.100837
564	AT1G06280	0	0	0	0	0	0	AT1G06280	1.04405	1.37209	0.716013	0.52184	-0.938321	0.86677	0.937107
565	AT1G06290	1489	1281	1226	6448	6676	5385	AT1G06290	3099.84	1820.52	4379.17	2.40545	1.26631	6.7982e-129	1.50367e-126
566	AT1G06310	1	4	4	4	2	5	AT1G06310	4.50448	5.59392	3.41503	0.610489	-0.711962	0.61635	0.829791
567	AT1G06320	0	4	0	3	0	2	AT1G06320	2.59831	3.25771	1.9389	0.595172	-0.748621	0.733138	0.910266
568	AT1G06330	1	0	0	0	0	0	AT1G06330	1.25514	1.79427	0.716013	0.399054	-1.32534	0.696842	0.878823
569	AT1G06340	0	0	4	0	0	0	AT1G06340	2.00107	3.28612	0.716013	0.21789	-2.19833	0.341621	0.558285
570	AT1G06350	14	6	6	66	62	47	AT1G06350	27.4665	12.9821	41.951	3.23145	1.69218	0.000963075	0.00340898
571	AT1G06360	57	81	60	202	238	176	AT1G06360	119.242	92.3306	146.153	1.58293	0.662598	0.00324231	0.0103826
572	AT1G06380	44	26	75	148	122	136	AT1G06380	82.9286	68.0927	97.7645	1.43576	0.521811	0.223622	0.411461
573	AT1G06390	159	153	154	593	736	476	AT1G06390	319.547	214.314	424.779	1.98204	0.986988	4.62892e-12	4.03635e-11
574	AT1G06400	476	380	440	841	903	637	AT1G06400	576.558	592.007	561.109	0.947808	-0.0773338	0.493063	0.725213
575	AT1G06410	1064	988	888	2355	2524	2129	AT1G06410	1501.88	1341.24	1662.52	1.23954	0.309809	7.33547e-06	3.52097e-05
576	AT1G06420	20	18	2	7	14	4	AT1G06420	12.8496	19.258	6.44125	0.334471	-1.58005	0.101983	0.219163
577	AT1G06430	182	134	161	805	817	581	AT1G06430	368.713	218.417	519.01	2.37623	1.24868	1.33841e-20	2.05142e-19
578	AT1G06440	50	20	29	79	102	62	AT1G06440	51.7371	45.786	57.6882	1.25995	0.333372	0.375234	0.59939
579	AT1G06450	86	87	102	273	252	246	AT1G06450	155.895	127.5	184.291	1.44542	0.53149	0.00771737	0.0228788
580	AT1G06460	35	38	43	76	84	42	AT1G06460	51.1498	54.6376	47.6619	0.872328	-0.197057	0.64916	0.862398
581	AT1G06470	90	55	67	243	310	258	AT1G06470	145.368	97.3557	193.381	1.98634	0.990112	3.49924e-06	1.75001e-05
582	AT1G06475	28	52	30	20	36	20	AT1G06475	35.2932	52.0614	18.5249	0.355827	-1.49075	0.00641255	0.0193393
583	AT1G06490	14	10	7	19	29	26	AT1G06490	16.8721	15.3462	18.3979	1.19886	0.261659	0.742749	0.916979
584	AT1G06500	85	48	73	99	100	78	AT1G06500	80.4717	94.816	66.1275	0.69743	-0.51988	0.0564158	0.13228
585	AT1G06510	4	23	33	31	42	32	AT1G06510	27.6379	29.6939	25.5819	0.86152	-0.215043	0.843324	0.937107
586	AT1G06515	112	92	101	185	191	169	AT1G06515	135.252	140.355	130.15	0.927293	-0.108904	0.600366	0.814468
587	AT1G06520	122	57	64	67	106	66	AT1G06520	83.647	110.373	56.9213	0.515719	-0.955343	0.0266447	0.0691102
588	AT1G06530	803	711	687	1924	1810	1624	AT1G06530	1138.22	1004.29	1272.16	1.26673	0.341105	1.29738e-05	6.046e-05
589	AT1G06540	0	2	0	1	2	2	AT1G06540	2.118	2.3149	1.9211	0.829886	-0.269015	0.990117	1
590	AT1G06550	308	189	184	98	94	108	AT1G06550	190.634	308.545	72.7236	0.235699	-2.08499	1.35354e-09	9.63233e-09
591	AT1G06560	29	28	16	134	158	113	AT1G06560	65.3368	34.4708	96.2028	2.79085	1.4807	4.15775e-06	2.06077e-05
592	AT1G06570	212	177	159	747	811	593	AT1G06570	379.094	250.396	507.792	2.02796	1.02003	9.23104e-15	9.96191e-14
593	AT1G06580	13	12	10	65	68	55	AT1G06580	31.2515	17.3024	45.2006	2.61239	1.38537	0.00300147	0.00967512
594	AT1G06590	18	14	19	88	92	81	AT1G06590	43.6813	24.6627	62.7	2.54231	1.34614	0.000589544	0.00216628
595	AT1G06620	35	28	24	76	80	60	AT1G06620	46.2502	40.8319	51.6685	1.26539	0.339587	0.376528	0.601198
596	AT1G06630	52	72	79	244	246	189	AT1G06630	128.01	95.0687	160.952	1.69301	0.759588	0.000438428	0.001645
597	AT1G06640	45	34	35	140	133	82	AT1G06640	68.4285	53.1458	83.7112	1.57513	0.655467	0.0300194	0.0766645
598	AT1G06645	0	7	9	11	14	5	AT1G06645	8.29926	8.97849	7.62003	0.848698	-0.236677	0.920353	0.9755
599	AT1G06650	127	53	81	359	281	240	AT1G06650	163.618	118.733	208.504	1.75608	0.812358	0.00680521	0.0204036
600	AT1G06660	8	3	4	4	11	12	AT1G06660	7.67622	8.07779	7.27465	0.900575	-0.151082	0.87185	0.94155
601	AT1G06670	112	109	122	674	693	523	AT1G06670	302.471	158.417	446.524	2.81866	1.49501	1.02053e-23	1.88874e-22
602	AT1G06680	354	368	303	500	570	415	AT1G06680	410.118	469.289	350.947	0.747827	-0.419224	0.00080465	0.00288991
603	AT1G06690	39	40	61	194	221	187	AT1G06690	104.747	65.8823	143.612	2.17983	1.12422	4.88978e-06	2.40172e-05
604	AT1G06700	301	364	362	1651	1647	1341	AT1G06700	785.609	473.26	1097.96	2.31999	1.21412	1.94968e-38	6.5324e-37
605	AT1G06710	21	8	7	47	58	38	AT1G06710	25.8432	17.3587	34.3277	1.97755	0.983715	0.0614365	0.142505
606	AT1G06720	93	64	94	198	268	168	AT1G06720	132.701	115.785	149.618	1.29221	0.369841	0.0829476	0.184143
607	AT1G06730	138	119	111	350	303	260	AT1G06730	192.762	168.845	216.679	1.28331	0.359865	0.0478689	0.114853
608	AT1G06750	18	15	7	45	33	31	AT1G06750	22.9588	19.392	26.5256	1.36786	0.451925	0.43312	0.662565
609	AT1G06760	1083	936	931	2731	2581	2094	AT1G06760	1548.05	1345.32	1750.79	1.30139	0.380057	1.87194e-08	1.2034e-07
610	AT1G06770	4	5	23	91	101	62	AT1G06770	38.3085	16.4235	60.1934	3.66507	1.87384	1.07712e-05	5.07608e-05
611	AT1G06780	36	38	43	149	149	100	AT1G06780	74.5904	55.0598	94.121	1.70943	0.773517	0.0067194	0.0201686
612	AT1G06790	69	73	57	208	240	179	AT1G06790	120.477	92.1901	148.764	1.61366	0.69034	0.00243588	0.0080095
613	AT1G06800	173	157	125	357	322	290	AT1G06800	219.388	208.233	230.542	1.10713	0.146826	0.414991	0.646635
614	AT1G06810	2	0	0	0	0	0	AT1G06810	1.46623	2.21646	0.716013	0.323044	-1.6302	0.555354	0.768536
615	AT1G06820	100	82	76	256	255	216	AT1G06820	145.784	118.612	172.956	1.45816	0.544153	0.00966593	0.0280323
616	AT1G06830	0	0	0	0	0	0	AT1G06830	1.04405	1.37209	0.716013	0.52184	-0.938321	0.86677	0.937107
617	AT1G06840	36	34	54	131	143	121	AT1G06840	76.4288	58.4378	94.4198	1.61573	0.692188	0.0145259	0.0403875
618	AT1G06850	45	48	45	53	58	45	AT1G06850	51.0585	64.5305	37.5866	0.582462	-0.779764	0.026626	0.0690814
619	AT1G06870	192	202	213	265	290	259	AT1G06870	236.93	279.577	194.284	0.694923	-0.525076	0.00122015	0.00423733
620	AT1G06890	470	373	384	853	976	670	AT1G06890	574.036	559.378	588.693	1.05241	0.0736929	0.482235	0.712213
621	AT1G06900	168	113	147	633	714	615	AT1G06900	331.321	195.908	466.735	2.38242	1.25243	1.6017e-18	2.20415e-17
622	AT1G06910	10	12	12	28	38	15	AT1G06910	18.207	16.9929	19.4212	1.14291	0.192707	0.733261	0.910336
623	AT1G06920	0	1	0	0	1	0	AT1G06920	1.38877	1.8435	0.934051	0.506673	-0.980873	0.799176	0.937107
624	AT1G06923	5	0	1	6	1	2	AT1G06923	3.39962	3.96151	2.83774	0.716329	-0.481306	0.766881	0.935552
625	AT1G06925	2	0	0	3	0	1	AT1G06925	1.94216	2.21646	1.66786	0.752489	-0.410258	0.905723	0.964578
626	AT1G06930	2	0	0	2	0	2	AT1G06930	1.96421	2.21646	1.71196	0.772388	-0.372602	0.908719	0.96673
627	AT1G06950	291	418	333	1542	1585	1339	AT1G06950	769.89	480.617	1059.16	2.20376	1.13996	4.43667e-18	5.9314e-17
628	AT1G06960	34	27	28	91	85	40	AT1G06960	46.2972	41.8524	50.7419	1.2124	0.277868	0.434222	0.662565
629	AT1G06970	3	0	3	2	0	0	AT1G06970	2.62202	4.07416	1.16988	0.287147	-1.80014	0.329915	0.55167
630	AT1G06980	0	6	0	3	6	0	AT1G06980	3.45278	4.20052	2.70504	0.643978	-0.634916	0.775962	0.937107
631	AT1G06990	0	0	1	0	0	4	AT1G06990	1.82539	1.8506	1.80017	0.972751	-0.0398571	1	1
632	AT1G07000	959	837	668	2500	2384	1998	AT1G07000	1374.92	1120.45	1629.39	1.45423	0.540254	1.11098e-07	6.58358e-07
633	AT1G07010	46	24	34	47	41	53	AT1G07010	41.531	48.3754	34.6866	0.717031	-0.479893	0.184446	0.355287
634	AT1G07020	177	148	150	269	270	222	AT1G07020	199.222	217.642	180.803	0.830734	-0.267542	0.124637	0.258747
635	AT1G07025	0	0	0	0	0	0	AT1G07025	1.04405	1.37209	0.716013	0.52184	-0.938321	0.86677	0.937107
636	AT1G07030	458	545	507	999	1103	879	AT1G07030	700.207	694.25	706.164	1.01716	0.0245486	0.785739	0.937107
637	AT1G07040	194	157	155	363	428	299	AT1G07040	244.455	231.454	257.455	1.11233	0.15359	0.340861	0.558285
638	AT1G07050	7	4	8	1	0	0	AT1G07050	5.49199	10.041	0.942948	0.0939094	-3.41259	0.00723618	0.0215698
639	AT1G07060	0	0	0	0	0	0	AT1G07060	1.04405	1.37209	0.716013	0.52184	-0.938321	0.86677	0.937107
640	AT1G07070	79	75	60	84	75	73	AT1G07070	77.3538	98.7902	55.9173	0.566021	-0.821072	0.00320016	0.0102597
641	AT1G07080	2551	2259	2177	7868	8229	6456	AT1G07080	4257.64	3184.97	5330.31	1.67358	0.74294	5.59875e-59	3.54232e-57
642	AT1G07090	206	225	138	298	354	218	AT1G07090	232.528	260.441	204.615	0.785646	-0.348049	0.172779	0.335999
643	AT1G07110	132	98	139	538	565	482	AT1G07110	273.225	169.81	376.64	2.218	1.14926	1.2068e-13	1.19913e-12
644	AT1G07120	10	18	21	52	43	25	AT1G07120	26.3981	24.1278	28.6683	1.18818	0.248756	0.570735	0.783658
645	AT1G07130	480	422	475	1001	922	815	AT1G07130	640.025	630.243	649.807	1.03104	0.0441026	0.661344	0.868766
646	AT1G07135	2255	2136	2083	3653	4001	3322	AT1G07135	2779.76	2957.04	2602.47	0.880094	-0.184271	0.000504391	0.00187542
647	AT1G07140	1443	1213	1418	4322	4562	3843	AT1G07140	2439.37	1860.92	3017.83	1.62169	0.697496	1.79862e-24	3.44125e-23
648	AT1G07150	864	819	940	2639	2739	2261	AT1G07150	1505.82	1202.01	1809.63	1.50549	0.590237	5.78283e-14	5.87702e-13
649	AT1G07160	1527	1351	1252	3549	3864	3227	AT1G07160	2202.63	1882	2523.25	1.34073	0.423017	7.32607e-13	6.84689e-12
650	AT1G07170	81	98	93	224	235	172	AT1G07170	137.837	126.268	149.407	1.18326	0.242766	0.225934	0.415014
651	AT1G07175	0	0	0	0	0	0	AT1G07175	1.04405	1.37209	0.716013	0.52184	-0.938321	0.86677	0.937107
652	AT1G07180	39	37	29	131	139	131	AT1G07180	72.7069	49.1558	96.258	1.95822	0.969544	0.00126119	0.00436705
653	AT1G07190	0	0	0	0	0	0	AT1G07190	1.04405	1.37209	0.716013	0.52184	-0.938321	0.86677	0.937107
654	AT1G07200	103	56	49	254	254	208	AT1G07200	132.409	94.7023	170.115	1.79632	0.845043	0.000200804	0.000794282
655	AT1G07210	179	145	156	539	588	486	AT1G07210	301.455	219.943	382.966	1.7412	0.800083	4.69801e-08	2.90157e-07
656	AT1G07220	41	23	25	214	272	198	AT1G07220	101.869	41.4865	162.252	3.91097	1.96753	1.28296e-13	1.27202e-12
657	AT1G07230	142	77	79	485	469	407	AT1G07230	229.387	135.422	323.353	2.38774	1.25565	3.43729e-13	3.30558e-12
658	AT1G07240	987	971	975	1048	1263	1005	AT1G07240	1064.33	1342.34	786.321	0.585782	-0.771563	4.60078e-20	6.89255e-19
659	AT1G07250	243	220	204	613	665	551	AT1G07250	369.726	305.287	434.166	1.42216	0.508081	0.000116327	0.000477273
660	AT1G07260	79	100	79	199	186	155	AT1G07260	124.055	119.667	128.442	1.07333	0.102096	0.627805	0.841095
661	AT1G07270	2	0	4	1	2	1	AT1G07270	2.89028	4.13049	1.65006	0.399484	-1.32379	0.459006	0.686214
662	AT1G07280	55	59	43	233	214	168	AT1G07280	109.384	72.9808	145.787	1.99761	0.998271	3.56435e-05	0.000157243
663	AT1G07290	8	8	7	14	13	17	AT1G07290	11.6028	11.8703	11.3353	0.954925	-0.0665403	0.952259	0.998734
664	AT1G07300	28	9	10	37	19	10	AT1G07300	19.0933	22.2209	15.9657	0.718501	-0.476938	0.502537	0.735253
665	AT1G07310	1487	1513	1423	1805	1844	1598	AT1G07310	1634.41	2023.31	1245.52	0.615585	-0.69997	5.74574e-21	9.00453e-20
666	AT1G07320	989	907	770	2065	1923	1591	AT1G07320	1267.39	1214.92	1319.85	1.08636	0.119506	0.168316	0.328675
667	AT1G07330	2	0	0	0	0	2	AT1G07330	1.73727	2.21646	1.25809	0.567615	-0.817015	0.744123	0.916979
668	AT1G07340	76	53	76	11	0	3	AT1G07340	49.4172	94.8089	4.02542	0.0424583	-4.55781	3.08714e-25	6.17111e-24
669	AT1G07350	158	116	102	600	540	514	AT1G07350	282.75	171.567	393.932	2.29608	1.19917	8.97532e-15	9.69748e-14
670	AT1G07360	341	293	305	980	1085	877	AT1G07360	563.394	429.402	697.386	1.62408	0.699627	8.62726e-11	6.84096e-10
671	AT1G07370	78	54	36	173	166	115	AT1G07370	92.162	76.9843	107.34	1.39431	0.479546	0.0752314	0.169573
672	AT1G07380	97	114	91	757	868	649	AT1G07380	338.638	139.608	537.668	3.85127	1.94533	5.40464e-41	1.98433e-39
673	AT1G07390	9	3	0	31	29	24	AT1G07390	13.5825	6.58594	20.5791	3.1247	1.64372	0.0304018	0.0775537
674	AT1G07400	42	43	57	43	28	29	AT1G07400	45.5442	66.649	24.4394	0.366689	-1.44737	0.000117698	0.000482534
675	AT1G07410	27	29	28	60	66	39	AT1G07410	39.5666	39.8399	39.2932	0.986276	-0.0199362	1	1
676	AT1G07420	154	162	149	257	243	220	AT1G07420	192.852	214.053	171.65	0.801905	-0.318496	0.0765155	0.171975
677	AT1G07430	532	426	437	2678	2749	2343	AT1G07430	1239.39	635.899	1842.88	2.89807	1.53509	7.99516e-87	9.17791e-85
678	AT1G07440	41	36	37	83	96	78	AT1G07440	57.4906	53.3569	61.6244	1.15495	0.207828	0.546666	0.768536
679	AT1G07450	2	2	0	0	0	0	AT1G07450	1.93764	3.15926	0.716013	0.226639	-2.14153	0.342676	0.558285
680	AT1G07460	0	0	0	0	0	0	AT1G07460	1.04405	1.37209	0.716013	0.52184	-0.938321	0.86677	0.937107
681	AT1G07470	95	118	104	287	355	246	AT1G07470	178.398	146.87	209.926	1.42933	0.515341	0.00465017	0.0144586
682	AT1G07473	11	11	30	59	66	44	AT1G07473	32.9891	25.5568	40.4214	1.58163	0.661416	0.133984	0.273866
683	AT1G07476	6	2	3	5	4	4	AT1G07476	5.04526	6.28351	3.807	0.605871	-0.722916	0.552055	0.768536
684	AT1G07480	92	85	82	307	295	246	AT1G07480	160.451	119.52	201.382	1.68493	0.752686	0.000149419	0.000602773
685	AT1G07485	2	2	1	0	0	1	AT1G07485	2.31241	3.63777	0.987053	0.271335	-1.88186	0.337373	0.558285
686	AT1G07490	2	2	1	0	0	0	AT1G07490	2.17689	3.63777	0.716013	0.196827	-2.345	0.265195	0.46775
687	AT1G07500	70	43	53	104	162	98	AT1G07500	81.3787	76.5561	86.2013	1.12599	0.171193	0.557258	0.769267
688	AT1G07510	472	353	392	2013	2059	1682	AT1G07510	958.494	554.622	1362.37	2.45638	1.29654	4.44645e-51	2.26536e-49
689	AT1G07520	132	82	72	461	431	372	AT1G07520	215.171	130.208	300.134	2.30504	1.20479	1.11426e-11	9.4438e-11
690	AT1G07530	732	595	620	1771	1838	1536	AT1G07530	1053.63	887.569	1219.69	1.37419	0.458582	1.44002e-08	9.33679e-08
691	AT1G07540	1	0	0	16	17	5	AT1G07540	5.60155	1.79427	9.40882	5.2438	2.39061	0.0583372	0.136187
692	AT1G07550	4	4	4	0	0	0	AT1G07550	3.78824	6.86047	0.716013	0.104368	-3.26025	0.0364902	0.0908864
693	AT1G07560	4	2	0	0	0	0	AT1G07560	2.35982	4.00363	0.716013	0.178841	-2.48325	0.204713	0.385293
694	AT1G07570	59	63	69	248	275	223	AT1G07570	133.197	88.9963	177.398	1.99332	0.995175	4.8487e-06	2.38283e-05
695	AT1G07590	3474	3431	3475	3262	3332	2700	AT1G07590	3473.76	4748.23	2199.29	0.463181	-1.11035	1.24775e-44	5.12784e-43
696	AT1G07600	856	894	824	825	860	672	AT1G07600	868.037	1178.49	557.589	0.47314	-1.07966	2.83276e-31	7.34682e-30
697	AT1G07610	739	669	748	687	666	602	AT1G07610	725.829	986.657	465	0.471288	-1.08532	6.18477e-28	1.41874e-26
698	AT1G07615	40	46	48	211	190	173	AT1G07615	99.9144	62.9123	136.916	2.17631	1.12188	9.19634e-06	4.36642e-05
699	AT1G07620	109	91	80	287	359	232	AT1G07620	167.786	128.568	207.003	1.61007	0.687119	0.000387457	0.00146874
700	AT1G07630	196	235	224	1227	1213	1015	AT1G07630	560.418	302.085	818.751	2.71033	1.43847	7.38775e-39	2.51868e-37
701	AT1G07640	45	27	19	27	16	11	AT1G07640	27.7516	42.1898	13.3133	0.315557	-1.66403	0.00116346	0.00405548
702	AT1G07645	270	298	301	739	731	603	AT1G07645	445.557	399.87	491.244	1.22851	0.296907	0.0102945	0.0296561
703	AT1G07650	55	48	13	80	120	72	AT1G07650	58.9952	53.4401	64.5503	1.2079	0.272501	0.609978	0.824887
704	AT1G07660	274	204	214	485	472	391	AT1G07660	317.643	315.617	319.67	1.01284	0.0184094	0.948111	0.996035
705	AT1G07670	1153	1031	1128	2705	2849	2323	AT1G07670	1689.66	1513.92	1865.39	1.23216	0.301188	3.05993e-06	1.5445e-05
706	AT1G07680	0	0	0	1	0	4	AT1G07680	1.6996	1.37209	2.02711	1.47738	0.563045	0.948796	0.996485
707	AT1G07690	55	44	42	34	46	32	AT1G07690	46.283	65.4312	27.1348	0.414708	-1.26983	0.000535319	0.00198175
708	AT1G07700	46	71	87	92	137	109	AT1G07700	88.4505	95.8923	81.0086	0.844787	-0.24334	0.563428	0.775701
709	AT1G07705	71	77	113	321	502	375	AT1G07705	203.187	121.716	284.657	2.33869	1.2257	4.46973e-05	0.00019494
710	AT1G07710	35	6	18	6	6	8	AT1G07710	16.5721	27.59	5.55417	0.201311	-2.3125	0.0207816	0.0553972
711	AT1G07720	160	145	123	54	29	43	AT1G07720	113.54	196.131	30.9483	0.157794	-2.66389	4.23001e-27	9.34105e-26
712	AT1G07725	156	125	104	398	410	418	AT1G07725	234.825	175.923	293.726	1.66963	0.739532	6.03085e-05	0.000258753
713	AT1G07730	41	47	56	104	71	67	AT1G07730	62.7958	67.634	57.9576	0.856931	-0.222749	0.520765	0.753853
714	AT1G07740	71	54	96	154	124	102	AT1G07740	96.5432	102.74	90.3468	0.879377	-0.185446	0.599137	0.813177
715	AT1G07745	2	14	15	45	49	32	AT1G07745	23.1395	15.9937	30.2852	1.89357	0.921108	0.069173	0.157879
716	AT1G07747	0	0	0	0	0	0	AT1G07747	1.04405	1.37209	0.716013	0.52184	-0.938321	0.86677	0.937107
717	AT1G07750	1632	1417	1558	1323	1421	1114	AT1G07750	1508.29	2103.87	912.722	0.433831	-1.2048	4.28231e-64	3.074e-62
718	AT1G07770	1484	1276	1489	4012	3882	3287	AT1G07770	2295.21	1941.9	2648.51	1.36388	0.447714	4.94912e-09	3.3519e-08
719	AT1G07780	39	29	20	117	124	115	AT1G07780	63.2759	41.078	85.4737	2.08076	1.05711	0.00122996	0.00427032
720	AT1G07790	499	426	452	676	757	559	AT1G07790	549.917	629.144	470.69	0.748144	-0.418613	0.000106077	0.000437727
721	AT1G07795	10	6	10	4	2	0	AT1G07795	7.63362	13.2074	2.05983	0.15596	-2.68075	0.00827369	0.0243899
722	AT1G07810	850	757	843	1841	2177	1834	AT1G07810	1255.36	1120.46	1390.26	1.24079	0.311262	0.00236685	0.00780137
723	AT1G07820	526	394	529	882	923	732	AT1G07820	631.413	662.303	600.523	0.906719	-0.141272	0.321766	0.542275
724	AT1G07830	99	104	147	393	400	326	AT1G07830	214.005	162.535	265.476	1.63335	0.707832	9.87799e-05	0.000409354
725	AT1G07840	98	75	49	205	179	164	AT1G07840	116.133	101.548	130.717	1.28724	0.364285	0.140134	0.284492
726	AT1G07850	0	0	6	0	0	0	AT1G07850	2.47958	4.24314	0.716013	0.168746	-2.56707	0.273601	0.476451
727	AT1G07860	0	0	0	1	1	4	AT1G07860	1.80862	1.37209	2.24515	1.63629	0.710431	0.875668	0.944512
728	AT1G07870	43	42	65	188	186	147	AT1G07870	97.1028	70.4279	123.778	1.75751	0.813534	0.00117088	0.0040777
729	AT1G07880	3	0	1	0	0	0	AT1G07880	1.91658	3.11714	0.716013	0.229702	-2.12217	0.343026	0.558285
730	AT1G07885	2	0	0	0	0	0	AT1G07885	1.46623	2.21646	0.716013	0.323044	-1.6302	0.555354	0.768536
731	AT1G07890	6136	5832	5514	9180	9344	7581	AT1G07890	7077.84	7979.6	6176.08	0.773984	-0.369624	2.04554e-21	3.29296e-20
732	AT1G07900	0	0	0	0	0	0	AT1G07900	1.04405	1.37209	0.716013	0.52184	-0.938321	0.86677	0.937107
733	AT1G07901	3	4	7	29	14	20	AT1G07901	11.8221	7.87381	15.7705	2.0029	1.00209	0.193121	0.369377
734	AT1G07910	24	31	15	194	181	158	AT1G07910	80.1631	33.2956	127.031	3.81524	1.93177	7.85352e-11	6.2566e-10
735	AT1G07920	11935	11205	11099	25511	26402	21351	AT1G07920	16483.4	15633.1	17333.7	1.10878	0.148969	2.13785e-06	1.09969e-05
736	AT1G07930	9712	9069	9312	20392	21205	16965	AT1G07930	13341.3	12832.6	13850.1	1.07929	0.110076	0.00125813	0.00435764
737	AT1G07940	10128	9542	9585	21628	22111	17358	AT1G07940	13898.2	13361.9	14434.6	1.08029	0.111412	0.00127798	0.00442126
738	AT1G07950	129	154	70	240	256	203	AT1G07950	163.972	161.925	166.019	1.02528	0.0360224	0.93044	0.982634
739	AT1G07960	183	149	117	477	422	356	AT1G07960	251.161	204.856	297.466	1.45208	0.538117	0.000848359	0.0030357
740	AT1G07970	68	56	74	234	202	200	AT1G07970	121.98	91.8886	152.071	1.65494	0.726782	0.00145143	0.00497389
741	AT1G07980	88	95	129	213	231	153	AT1G07980	142.962	145.035	140.889	0.971415	-0.0418409	0.958445	1
742	AT1G07985	1294	1239	1261	4384	4517	3674	AT1G07985	2355.71	1735.14	2976.28	1.71529	0.778455	1.83522e-42	7.05213e-41
743	AT1G07990	261	242	215	959	943	736	AT1G07990	475.981	328.52	623.442	1.89773	0.924272	3.20103e-15	3.56039e-14
744	AT1G08000	103	98	92	259	271	256	AT1G08000	161.522	135.077	187.967	1.39155	0.476694	0.0168905	0.0462763
745	AT1G08005	1	0	0	0	0	0	AT1G08005	1.25514	1.79427	0.716013	0.399054	-1.32534	0.696842	0.878823
746	AT1G08010	162	155	146	310	325	255	AT1G08010	211.869	212.695	211.043	0.992234	-0.011248	0.971543	1
747	AT1G08030	36	26	28	108	151	109	AT1G08030	64.9587	42.2253	87.6921	2.07676	1.05434	0.000902547	0.00321186
748	AT1G08032	0	0	0	0	0	0	AT1G08032	1.04405	1.37209	0.716013	0.52184	-0.938321	0.86677	0.937107
749	AT1G08035	4	4	13	1	1	4	AT1G08035	6.70609	11.167	2.24515	0.201051	-2.31436	0.0446195	0.108115
750	AT1G08040	74	65	64	289	311	221	AT1G08040	143.945	93.8793	194.01	2.06659	1.04725	6.76877e-07	3.69485e-06
751	AT1G08050	424	399	474	326	383	341	AT1G08050	422.955	595.28	250.63	0.421029	-1.24801	2.60407e-13	2.53023e-12
752	AT1G08060	62	72	69	314	275	229	AT1G08060	144.254	94.5055	194.002	2.05281	1.0376	7.0011e-07	3.81631e-06
753	AT1G08065	1	8	0	0	0	2	AT1G08065	3.4118	5.56551	1.25809	0.226052	-2.14527	0.267276	0.468224
754	AT1G08070	0	2	8	25	21	6	AT1G08070	9.36869	6.14296	12.5944	2.05022	1.03578	0.212777	0.395391
755	AT1G08080	1	0	0	0	0	0	AT1G08080	1.25514	1.79427	0.716013	0.399054	-1.32534	0.696842	0.878823
756	AT1G08090	21	27	16	27	27	18	AT1G08090	24.1155	30.6219	17.609	0.575045	-0.798252	0.12688	0.262581
757	AT1G08100	0	1	2	0	0	0	AT1G08100	1.75826	2.80051	0.716013	0.255672	-1.96763	0.438238	0.662565
758	AT1G08110	252	214	210	464	523	458	AT1G08110	326.657	309.129	344.184	1.1134	0.154972	0.291404	0.500778
759	AT1G08120	1	2	3	3	0	2	AT1G08120	3.05575	4.17261	1.9389	0.464673	-1.10571	0.525436	0.75888
760	AT1G08125	77	48	36	182	185	139	AT1G08125	96.8818	73.7337	120.03	1.62788	0.702996	0.00752134	0.0223512
761	AT1G08130	52	38	43	244	220	198	AT1G08130	109.769	61.8147	157.722	2.55154	1.35137	4.32639e-08	2.68057e-07
762	AT1G08135	0	0	0	0	0	0	AT1G08135	1.04405	1.37209	0.716013	0.52184	-0.938321	0.86677	0.937107
763	AT1G08140	4	7	0	0	0	0	AT1G08140	3.53833	6.36065	0.716013	0.112569	-3.15112	0.0494656	0.11807
764	AT1G08150	1	2	2	0	2	2	AT1G08150	2.69413	3.6941	1.69417	0.458615	-1.12464	0.552426	0.768536
765	AT1G08160	0	8	7	8	6	2	AT1G08160	6.43734	8.49288	4.3818	0.515938	-0.95473	0.427842	0.660006
766	AT1G08165	0	0	2	2	2	0	AT1G08165	1.96753	2.32911	1.60596	0.689516	-0.536343	0.909167	0.966895
767	AT1G08170	40	38	39	226	194	134	AT1G08170	92.7283	54.8345	130.622	2.38211	1.25224	1.98546e-06	1.02576e-05
768	AT1G08180	45	47	40	68	75	61	AT1G08180	55.3502	61.6666	49.0339	0.795145	-0.330709	0.330816	0.552667
769	AT1G08190	1623	1557	1544	4990	5216	4024	AT1G08190	2760.22	2159.36	3361.07	1.55651	0.638315	3.5367e-33	9.85856e-32
770	AT1G08200	698	664	681	2787	2926	2300	AT1G08200	1414.74	934.931	1894.56	2.02641	1.01893	1.45753e-46	6.36494e-45
771	AT1G08210	141	91	133	397	382	300	AT1G08210	211.425	167.439	255.412	1.5254	0.60919	0.000429401	0.00161425
772	AT1G08220	24	19	30	124	111	84	AT1G08220	55.3209	34.8164	75.8255	2.17787	1.12292	0.000959117	0.00339585
773	AT1G08230	426	354	372	540	505	432	AT1G08230	438.281	526.103	350.459	0.666142	-0.586099	8.33139e-07	4.50176e-06
774	AT1G08250	63	68	107	178	220	176	AT1G08250	124.004	111.225	136.782	1.22977	0.298391	0.281824	0.487588
775	AT1G08260	36	36	41	124	100	84	AT1G08260	63.2936	53.16	73.4271	1.38125	0.465972	0.133181	0.272743
776	AT1G08270	19	16	15	56	47	29	AT1G08270	27.823	24.1136	31.5323	1.30766	0.386983	0.423692	0.65624
777	AT1G08280	72	68	27	208	182	119	AT1G08280	98.2998	76.7444	119.855	1.56175	0.64316	0.0720586	0.163396
778	AT1G08290	3	4	1	2	2	2	AT1G08290	3.5754	5.00276	2.14804	0.429371	-1.2197	0.419627	0.652219
779	AT1G08300	18	24	6	23	30	17	AT1G08300	20.1202	23.1561	17.0843	0.73779	-0.438719	0.469619	0.698473
780	AT1G08310	11	7	28	37	35	27	AT1G08310	23.3881	22.7141	24.062	1.05934	0.0831676	0.88713	0.953668
781	AT1G08315	251	264	267	565	669	562	AT1G08315	393.339	359.552	427.126	1.18794	0.248462	0.0466474	0.112408
782	AT1G08320	397	401	356	2342	2429	1852	AT1G08320	1046.07	528.36	1563.78	2.95968	1.56544	1.60829e-78	1.57392e-76
783	AT1G08340	15	27	28	33	17	36	AT1G08340	27.75	33.8309	21.669	0.640507	-0.642713	0.186473	0.358301
784	AT1G08350	61	86	44	157	146	89	AT1G08350	90.5106	88.7203	92.3009	1.04036	0.0570812	0.841861	0.937107
785	AT1G08360	1131	993	890	3051	3137	2413	AT1G08360	1701.97	1372.84	2031.1	1.47949	0.565102	4.6295e-18	6.17705e-17
786	AT1G08370	325	299	321	682	759	574	AT1G08370	454.843	433.132	476.554	1.10025	0.137832	0.226737	0.415883
787	AT1G08380	50	57	76	34	32	26	AT1G08380	54.0869	85.7178	22.4561	0.261977	-1.93249	1.11659e-06	5.93667e-06
788	AT1G08390	6	6	33	26	28	29	AT1G08390	21.553	22.5244	20.5816	0.913746	-0.130134	0.941818	0.991414
789	AT1G08400	7	8	29	111	105	79	AT1G08400	46.0936	21.9753	70.212	3.19504	1.67583	1.09747e-05	5.16304e-05
790	AT1G08410	51	45	87	409	349	349	AT1G08410	174.984	85.7467	264.221	3.08141	1.62359	2.25682e-11	1.86453e-10
791	AT1G08420	1453	1329	1187	2105	2233	1798	AT1G08420	1630.95	1809.29	1452.62	0.802871	-0.31676	1.18408e-06	6.26853e-06
792	AT1G08430	0	0	4	0	4	0	AT1G08430	2.43714	3.28612	1.58816	0.483294	-1.04903	0.656629	0.864636
793	AT1G08440	0	0	0	1	1	0	AT1G08440	1.26654	1.37209	1.16099	0.846142	-0.241028	1	1
794	AT1G08450	68	56	64	198	232	160	AT1G08450	113.352	87.1036	139.6	1.60269	0.680499	0.00365231	0.0115976
795	AT1G08460	198	149	188	683	759	643	AT1G08460	370.322	245.163	495.482	2.02103	1.01509	2.75539e-14	2.87215e-13
796	AT1G08465	4	0	2	2	10	0	AT1G08465	3.68405	4.01783	3.35026	0.833848	-0.262144	0.933154	0.984695
797	AT1G08470	38	21	45	134	165	110	AT1G08470	72.8816	48.8473	96.916	1.98406	0.988455	0.000806436	0.00289521
798	AT1G08480	694	708	728	2308	2210	2135	AT1G08480	1280.75	976.474	1585.02	1.6232	0.698845	2.00254e-09	1.40729e-08
799	AT1G08490	146	189	159	496	492	396	AT1G08490	278.036	228.189	327.882	1.43689	0.522951	0.000378386	0.00143736
800	AT1G08500	51	44	76	202	223	185	AT1G08500	112.667	80.0117	145.322	1.81626	0.860968	0.000242466	0.000947504
801	AT1G08510	626	445	391	1099	1202	982	AT1G08510	720.445	662.529	778.361	1.17483	0.232455	0.146793	0.295914
802	AT1G08520	217	168	160	651	709	548	AT1G08520	350.156	248.743	451.57	1.81541	0.860295	3.15445e-10	2.38257e-09
803	AT1G08530	41	31	22	63	42	55	AT1G08530	41.45	43.8222	39.0777	0.891733	-0.165316	0.626298	0.839569
804	AT1G08540	51	70	56	173	197	146	AT1G08540	102.6	82.6981	122.501	1.48131	0.566869	0.0188088	0.0507938
805	AT1G08550	74	34	59	124	122	110	AT1G08550	81.0721	76.8732	85.271	1.10924	0.149574	0.652024	0.863473
806	AT1G08560	30	24	22	17	15	4	AT1G08560	22.4035	35.8784	8.92864	0.248858	-2.0066	0.000295923	0.00114229
807	AT1G08570	1018	859	969	2345	2539	2134	AT1G08570	1482.32	1299.76	1664.88	1.28091	0.357167	2.32796e-07	1.33561e-06
808	AT1G08580	220	219	166	179	217	181	AT1G08580	207.316	276.922	137.71	0.497288	-1.00785	4.40523e-09	2.99772e-08
809	AT1G08590	397	444	374	1752	1836	1455	AT1G08590	875.115	557.243	1192.99	2.14087	1.0982	1.76672e-35	5.28192e-34
810	AT1G08600	141	155	118	599	707	563	AT1G08600	316.915	190.431	443.398	2.32839	1.21933	2.99563e-17	3.8066e-16
811	AT1G08610	35	30	38	188	187	174	AT1G08610	89.8939	48.4739	131.314	2.70896	1.43774	1.33815e-07	7.86981e-07
812	AT1G08620	173	127	135	840	842	642	AT1G08620	373.907	198.876	548.937	2.76019	1.46477	2.48715e-27	5.54181e-26
813	AT1G08630	41	29	17	54	49	56	AT1G08630	39.6597	40.4869	38.8326	0.959141	-0.0601858	0.82332	0.937107
814	AT1G08640	252	228	221	757	743	599	AT1G08640	408.927	320.992	496.861	1.54789	0.630304	4.58699e-07	2.5515e-06
815	AT1G08650	5674	5212	5185	7623	7840	6368	AT1G08650	6250.45	7334.85	5166.04	0.704315	-0.505708	3.45655e-36	1.07106e-34
816	AT1G08660	79	89	57	265	264	217	AT1G08660	140.593	103.954	177.232	1.7049	0.769685	0.000288901	0.00111693
817	AT1G08670	2	3	1	5	3	0	AT1G08670	3.30699	4.10918	2.5048	0.609563	-0.714153	0.708446	0.887738
818	AT1G08680	129	154	113	532	633	484	AT1G08680	286.574	182.501	390.647	2.14052	1.09796	2.7193e-13	2.63936e-12
819	AT1G08695	0	0	0	0	0	0	AT1G08695	1.04405	1.37209	0.716013	0.52184	-0.938321	0.86677	0.937107
820	AT1G08700	1639	1594	1307	1407	1528	1145	AT1G08700	1516.84	2070.16	963.516	0.465432	-1.10336	1.00078e-22	1.74645e-21
821	AT1G08710	30	59	55	151	111	82	AT1G08710	74.7895	68.1683	81.4107	1.19426	0.256117	0.443818	0.668429
822	AT1G08720	62	58	51	336	357	258	AT1G08720	152.013	79.2927	224.734	2.83423	1.50296	7.76859e-13	7.23066e-12
823	AT1G08730	6	9	10	0	12	6	AT1G08730	8.9458	12.9329	4.95871	0.383418	-1.38301	0.122878	0.255798
824	AT1G08750	41	16	34	63	54	62	AT1G08750	43.0424	42.4933	43.5915	1.02584	0.0368117	1	1
825	AT1G08760	160	188	222	583	517	531	AT1G08760	326.72	263.774	389.667	1.47728	0.562941	0.00489216	0.0151418
826	AT1G08770	359	289	368	355	343	262	AT1G08770	346.17	465.262	227.077	0.488064	-1.03486	8.0984e-11	6.44414e-10
827	AT1G08780	178	174	118	182	162	84	AT1G08780	157.558	215.009	100.108	0.465598	-1.10284	7.42461e-05	0.000313801
828	AT1G08790	0	0	0	0	0	0	AT1G08790	1.04405	1.37209	0.716013	0.52184	-0.938321	0.86677	0.937107
829	AT1G08800	68	40	72	311	272	240	AT1G08800	139.519	83.3891	195.649	2.34621	1.23033	1.41005e-08	9.15554e-08
830	AT1G08810	29	24	17	2	12	4	AT1G08810	18.9671	33.0637	4.8705	0.147307	-2.76311	8.80594e-06	4.18763e-05
831	AT1G08820	173	179	205	686	742	535	AT1G08820	360.034	256.885	463.184	1.80308	0.850463	1.08453e-10	8.52768e-10
832	AT1G08830	592	512	490	547	623	505	AT1G08830	562.347	727.131	397.562	0.546755	-0.871035	2.01921e-16	2.41683e-15
833	AT1G08840	34	33	26	60	80	66	AT1G08840	46.6938	43.7238	49.6638	1.13585	0.183776	0.648404	0.861983
834	AT1G08845	26	19	5	30	29	37	AT1G08845	23.7868	23.698	23.8757	1.0075	0.010773	0.962823	1
835	AT1G08860	41	20	17	18	39	29	AT1G08860	28.7044	36.2442	21.1645	0.583941	-0.776106	0.11267	0.238174
836	AT1G08880	442	379	399	772	801	708	AT1G08880	550.009	557.563	542.455	0.972903	-0.0396324	0.685967	0.878823
837	AT1G08890	228	188	200	606	697	550	AT1G08890	360.619	281.955	439.283	1.55799	0.639686	1.64656e-06	8.55709e-06
838	AT1G08900	3	2	2	0	4	2	AT1G08900	3.33435	4.53846	2.13024	0.469376	-1.09118	0.497351	0.730217
839	AT1G08910	117	67	76	295	366	278	AT1G08910	170.765	118.718	222.813	1.87683	0.908294	3.96855e-06	1.97094e-05
840	AT1G08920	255	198	214	416	487	376	AT1G08920	303.992	304.767	303.217	0.994913	-0.00735836	0.944899	0.993811
841	AT1G08930	1922	1811	1632	3094	3472	2759	AT1G08930	2327.56	2447.44	2207.68	0.902036	-0.148744	0.00849059	0.024973
842	AT1G08940	56	60	31	116	109	94	AT1G08940	72.2083	68.1322	76.2844	1.11965	0.16305	0.612912	0.827579
843	AT1G08960	161	176	138	205	224	199	AT1G08960	184.18	218.345	150.015	0.687057	-0.541498	0.00288795	0.00935464
844	AT1G08970	405	438	392	1138	1140	957	AT1G08970	666.661	566.406	766.917	1.35401	0.437234	7.77409e-06	3.72035e-05
845	AT1G08980	122	125	115	318	346	262	AT1G08980	193.084	166.832	219.335	1.3147	0.394739	0.0259741	0.0676287
846	AT1G08985	0	4	7	0	0	0	AT1G08985	3.66164	6.60726	0.716013	0.108368	-3.206	0.048201	0.115558
847	AT1G08990	2	0	3	0	0	0	AT1G08990	2.184	3.65198	0.716013	0.196062	-2.35062	0.265043	0.46775
848	AT1G09000	7	4	4	3	15	8	AT1G09000	7.48136	8.12701	6.83571	0.84111	-0.249634	0.825684	0.937107
849	AT1G09010	261	162	182	1264	1302	1015	AT1G09010	560.785	275.017	846.553	3.07818	1.62208	6.63541e-47	2.93533e-45
850	AT1G09020	661	544	574	1031	1024	962	AT1G09020	765.119	811.541	718.697	0.885596	-0.17528	0.0456688	0.110382
851	AT1G09026	0	0	0	0	0	0	AT1G09026	1.04405	1.37209	0.716013	0.52184	-0.938321	0.86677	0.937107
852	AT1G09030	0	0	2	0	0	0	AT1G09030	1.52256	2.32911	0.716013	0.307419	-1.70172	0.556385	0.768536
853	AT1G09040	4	21	9	88	56	45	AT1G09040	31.1801	17.2669	45.0932	2.61154	1.3849	0.00932703	0.0271566
854	AT1G09050	9	6	19	41	35	21	AT1G09050	20.2177	17.0918	23.3435	1.36577	0.449718	0.408909	0.64058
855	AT1G09060	62	92	79	395	354	314	AT1G09060	180.683	108.719	252.647	2.32386	1.21653	1.01897e-10	8.03536e-10
856	AT1G09070	13685	12181	11968	24361	25118	20522	AT1G09070	16908	17247.9	16568	0.960584	-0.0580158	0.0634698	0.146758
857	AT1G09080	10	5	6	6	0	4	AT1G09080	6.99188	10.822	3.16178	0.292163	-1.77515	0.0707157	0.160726
858	AT1G09090	19	48	29	90	85	75	AT1G09090	52.9495	45.8977	60.0014	1.30729	0.386575	0.281975	0.487786
859	AT1G09100	251	291	250	937	1022	850	AT1G09100	515.359	364.145	666.573	1.83051	0.872249	7.37038e-15	8.03038e-14
860	AT1G09130	386	336	368	899	916	673	AT1G09130	542.84	498.817	586.863	1.17651	0.234515	0.0268922	0.0696658
861	AT1G09140	417	331	287	1180	1181	961	AT1G09140	628.63	470.788	786.472	1.67054	0.740317	8.43169e-13	7.82642e-12
862	AT1G09150	70	91	114	256	304	253	AT1G09150	161.02	128.372	193.668	1.50864	0.59325	0.00709736	0.0211978
863	AT1G09155	23	2	4	0	0	2	AT1G09155	7.5986	13.9391	1.25809	0.0902565	-3.46983	0.0736446	0.166507
864	AT1G09157	8	2	0	0	2	0	AT1G09157	3.42222	5.69235	1.15209	0.202392	-2.30477	0.132824	0.272335
865	AT1G09160	260	214	182	399	453	402	AT1G09160	299.05	299.108	298.992	0.999613	-0.000558406	0.927125	0.980292
866	AT1G09170	3	0	0	0	0	0	AT1G09170	1.67733	2.63864	0.716013	0.271357	-1.88173	0.438633	0.662565
867	AT1G09176	0	0	0	0	0	0	AT1G09176	1.04405	1.37209	0.716013	0.52184	-0.938321	0.86677	0.937107
868	AT1G09180	3	6	3	0	1	5	AT1G09180	4.59592	6.90259	2.28925	0.331651	-1.59226	0.19976	0.379702
869	AT1G09190	50	31	34	112	123	98	AT1G09190	66.4386	53.364	79.5133	1.49002	0.575331	0.0697438	0.159007
870	AT1G09195	11	19	7	68	51	54	AT1G09195	30.113	18.3223	41.9037	2.28703	1.19347	0.0113632	0.0324223
871	AT1G09200	495	435	391	367	436	279	AT1G09200	428.598	602.509	254.686	0.422709	-1.24226	3.86131e-24	7.26995e-23
872	AT1G09210	733	611	584	1929	1848	1497	AT1G09210	1062.73	878.308	1247.15	1.41995	0.505843	3.0783e-10	2.32892e-09
873	AT1G09220	2	5	2	26	43	20	AT1G09220	13.4716	5.53049	21.4128	3.87176	1.95299	0.00812306	0.0239796
874	AT1G09230	77	55	52	163	200	117	AT1G09230	98.8577	84.6897	113.026	1.33459	0.416393	0.0991517	0.213936
875	AT1G09240	254	219	280	675	765	585	AT1G09240	412.54	345.826	479.255	1.38583	0.470747	0.000121504	0.000496292
876	AT1G09245	0	0	0	0	0	0	AT1G09245	1.04405	1.37209	0.716013	0.52184	-0.938321	0.86677	0.937107
877	AT1G09250	330	314	230	726	853	672	AT1G09250	466.183	398.77	533.596	1.33811	0.420193	0.0014196	0.00487462
878	AT1G09260	5	0	1	0	2	2	AT1G09260	2.82784	3.96151	1.69417	0.427658	-1.22547	0.457104	0.684239
879	AT1G09270	680	614	527	1987	1954	1585	AT1G09270	1068.68	830.071	1307.28	1.5749	0.655262	3.24267e-16	3.82899e-15
880	AT1G09280	108	104	129	651	644	508	AT1G09280	292.138	157.721	426.556	2.70449	1.43536	1.82847e-21	2.95563e-20
881	AT1G09290	95	95	55	207	195	190	AT1G09290	127.144	112.581	141.707	1.25871	0.331948	0.155464	0.309766
882	AT1G09300	56	34	47	125	111	85	AT1G09300	69.9277	63.5319	76.3235	1.20134	0.264647	0.391761	0.619991
883	AT1G09310	129	56	48	109	134	103	AT1G09310	93.8933	105.2	82.5861	0.785036	-0.34917	0.42718	0.659284
884	AT1G09320	70	50	50	210	224	207	AT1G09320	115.869	78.4204	153.318	1.95508	0.967228	5.21592e-05	0.000225531
885	AT1G09330	187	141	148	444	465	395	AT1G09330	263.765	217.607	309.924	1.42423	0.510187	0.00117388	0.00408761
886	AT1G09340	31	37	50	117	81	82	AT1G09340	61.4904	55.8271	67.1538	1.20289	0.266504	0.383383	0.609354
887	AT1G09350	1	0	0	0	0	0	AT1G09350	1.25514	1.79427	0.716013	0.399054	-1.32534	0.696842	0.878823
888	AT1G09360	0	0	0	0	0	0	AT1G09360	1.04405	1.37209	0.716013	0.52184	-0.938321	0.86677	0.937107
889	AT1G09370	102	73	66	19	3	8	AT1G09370	59.1394	110.429	7.85021	0.0710886	-3.81424	1.6067e-24	3.08918e-23
890	AT1G09380	5198	4685	4900	6261	6503	5299	AT1G09380	5512.39	6749.09	4275.7	0.633522	-0.658532	9.63317e-56	5.61199e-54
891	AT1G09390	150	209	159	569	531	393	AT1G09390	295.722	239.306	352.139	1.4715	0.557291	0.00247121	0.00811195
892	AT1G09400	5	9	13	28	36	19	AT1G09400	17.0078	13.9462	20.0693	1.43905	0.525116	0.374824	0.598864
893	AT1G09410	5	16	3	18	17	26	AT1G09410	14.0078	12.461	15.5545	1.24826	0.319916	0.714046	0.893001
894	AT1G09415	23	26	20	37	26	24	AT1G09415	27.0977	32.9089	21.2866	0.646832	-0.628536	0.198885	0.378461
895	AT1G09420	43	48	44	143	202	171	AT1G09420	93.3834	63.2076	123.559	1.95482	0.967032	0.000222408	0.000873513
896	AT1G09430	215	324	274	1222	1192	953	AT1G09430	586.11	375.987	796.233	2.11771	1.08251	3.79138e-13	3.63327e-12
897	AT1G09440	30	13	14	4	4	0	AT1G09440	14.6804	26.8649	2.4959	0.0929058	-3.42809	5.46841e-06	2.66715e-05
898	AT1G09450	18	3	11	3	8	9	AT1G09450	10.6148	15.6492	5.58048	0.3566	-1.48762	0.0678743	0.155241
899	AT1G09460	38	12	14	23	16	21	AT1G09460	22.4435	29.7709	15.116	0.507742	-0.977831	0.139243	0.283001
900	AT1G09470	10	9	6	2	6	6	AT1G09470	8.40597	12.7076	4.10435	0.322984	-1.63046	0.0677666	0.155081
901	AT1G09480	0	0	1	2	2	0	AT1G09480	1.72828	1.8506	1.60596	0.867804	-0.204559	1	1
902	AT1G09483	1	1	0	0	0	0	AT1G09483	1.49085	2.26568	0.716013	0.316026	-1.66189	0.555814	0.768536
903	AT1G09490	45	32	49	90	110	79	AT1G09490	62.7193	58.9021	66.5365	1.12961	0.175828	0.580636	0.794047
904	AT1G09500	19	20	23	23	61	48	AT1G09500	31.0365	29.8273	32.2458	1.08108	0.112476	0.831417	0.937107
905	AT1G09510	17	12	13	5	14	6	AT1G09510	13.478	20.4266	6.52946	0.319654	-1.64542	0.0200933	0.0537944
906	AT1G09520	142	141	104	424	536	354	AT1G09520	243.654	177.555	309.753	1.74455	0.802855	6.206e-07	3.39924e-06
907	AT1G09530	250	210	263	1582	1763	1335	AT1G09530	718.863	331.76	1105.97	3.33364	1.7371	1.95565e-67	1.51152e-65
908	AT1G09540	37	28	8	0	2	3	AT1G09540	17.9927	34.0202	1.96521	0.057766	-4.11364	0.0001211	0.000494842
909	AT1G09550	3	0	1	0	0	0	AT1G09550	1.91658	3.11714	0.716013	0.229702	-2.12217	0.343026	0.558285
910	AT1G09560	1445	1409	1452	1480	1759	1360	AT1G09560	1529.57	1970.43	1088.72	0.552532	-0.85587	2.10281e-23	3.80886e-22
911	AT1G09570	3630	3397	3482	15515	16092	12712	AT1G09570	7638.58	4801.41	10475.7	2.1818	1.12552	1.32931e-187	5.56388e-185
912	AT1G09575	8	40	21	59	53	72	AT1G09575	39.4152	33.6544	45.1761	1.34235	0.424765	0.471681	0.700784
913	AT1G09580	61	64	39	131	144	110	AT1G09580	83.8066	75.9568	91.6564	1.20669	0.271055	0.332218	0.554771
914	AT1G09590	1539	1365	1423	2507	2841	2099	AT1G09590	1866.75	1975.49	1758	0.889905	-0.168276	0.0080686	0.0238369
915	AT1G09600	2	8	4	19	14	14	AT1G09600	9.8883	7.90172	11.8749	1.50282	0.587673	0.488705	0.720172
916	AT1G09610	12	10	4	10	17	18	AT1G09610	12.3185	13.0663	11.5707	0.885537	-0.175375	0.798962	0.937107
917	AT1G09620	616	433	533	2350	2532	2027	AT1G09620	1178.04	720.598	1635.48	2.26962	1.18245	1.26729e-51	6.52988e-50
918	AT1G09625	0	1	0	0	2	0	AT1G09625	1.49779	1.8435	1.15209	0.624947	-0.678194	0.890942	0.955871
919	AT1G09630	263	249	181	297	323	272	AT1G09630	264.33	316.395	212.265	0.670885	-0.575863	0.000392242	0.0014846
920	AT1G09640	2211	1811	1970	6630	6822	5331	AT1G09640	3584.43	2731.19	4437.66	1.62481	0.700272	6.6117e-47	2.92961e-45
921	AT1G09645	146	154	143	239	260	192	AT1G09645	183.858	204.033	163.683	0.802236	-0.317901	0.0922263	0.2011
922	AT1G09650	9	33	10	26	17	26	AT1G09650	21.4416	25.5131	17.37	0.680826	-0.554642	0.536526	0.768536
923	AT1G09660	281	198	185	619	664	529	AT1G09660	365.607	301.867	429.346	1.4223	0.508228	0.000168947	0.000675939
924	AT1G09665	0	0	0	0	0	0	AT1G09665	1.04405	1.37209	0.716013	0.52184	-0.938321	0.86677	0.937107
925	AT1G09680	3	16	5	39	45	35	AT1G09680	20.7191	12.5736	28.8646	2.29564	1.1989	0.032192	0.0814332
926	AT1G09690	2642	2231	2127	5689	5793	4830	AT1G09690	3525.12	3186.26	3863.97	1.2127	0.278217	1.89433e-08	1.21636e-07
927	AT1G09700	82	52	87	195	231	197	AT1G09700	125.432	102.134	148.73	1.45622	0.54223	0.0162858	0.044818
928	AT1G09710	27	35	20	113	88	60	AT1G09710	50.3249	38.8403	61.8094	1.59137	0.670272	0.0552208	0.129836
929	AT1G09720	5	3	0	1	0	0	AT1G09720	2.92008	4.89721	0.942948	0.192548	-2.37671	0.162989	0.320882
930	AT1G09730	61	84	102	416	449	406	AT1G09730	209.297	115.531	303.062	2.62321	1.39134	4.68699e-14	4.80099e-13
931	AT1G09740	61	96	91	172	172	144	AT1G09740	116.103	115.924	116.281	1.00308	0.0044357	0.931445	0.98331
932	AT1G09750	185	197	241	262	241	217	AT1G09750	229.599	287.663	171.536	0.596309	-0.745868	0.000888452	0.00316543
933	AT1G09760	118	140	110	329	433	320	AT1G09760	213.171	169.822	256.521	1.51053	0.595053	0.000459348	0.00171686
934	AT1G09770	401	415	369	2016	2124	1683	AT1G09770	960.18	542.869	1377.49	2.53743	1.34337	2.95802e-55	1.68008e-53
935	AT1G09780	2654	2431	2383	4701	4845	3943	AT1G09780	3300.38	3408.11	3192.64	0.936778	-0.0942204	0.059376	0.138339
936	AT1G09790	73	73	63	11	3	6	AT1G09790	51.1212	96.7498	5.49265	0.0567717	-4.13868	1.93246e-23	3.50966e-22
937	AT1G09794	53	36	48	30	40	25	AT1G09794	43.3541	63.6866	23.0216	0.361482	-1.468	0.00012701	0.000517009
938	AT1G09795	242	270	196	720	817	665	AT1G09795	423.547	324.607	522.488	1.6096	0.686705	2.97406e-08	1.87557e-07
939	AT1G09800	19	12	18	68	37	32	AT1G09800	28.2759	23.6635	32.8883	1.38983	0.474909	0.326276	0.548586
940	AT1G09810	64	28	51	96	137	131	AT1G09810	76.9371	65.9949	87.8792	1.33161	0.413168	0.276389	0.480107
941	AT1G09812	0	2	0	0	0	0	AT1G09812	1.51546	2.3149	0.716013	0.309306	-1.69289	0.55626	0.768536
942	AT1G09815	192	151	167	401	327	268	AT1G09815	234.589	233.524	235.654	1.00912	0.0131017	0.946942	0.995267
943	AT1G09820	14	15	24	62	74	68	AT1G09820	37.5947	25.8379	49.3515	1.91005	0.933607	0.0235643	0.061995
944	AT1G09830	348	179	188	389	419	383	AT1G09830	303.396	322.632	284.16	0.880756	-0.183186	0.483505	0.713702
945	AT1G09840	134	132	112	368	359	264	AT1G09840	203.91	173.763	234.058	1.347	0.42975	0.0130746	0.0368189
946	AT1G09850	22	19	45	92	115	83	AT1G09850	55.1572	41.1496	69.1647	1.68081	0.749158	0.0354124	0.088575
947	AT1G09860	0	0	1	5	3	2	AT1G09860	2.44874	1.8506	3.04688	1.64643	0.71934	0.768187	0.936768
948	AT1G09870	147	112	100	532	549	414	AT1G09870	258.72	164.081	353.359	2.15357	1.10673	4.1823e-12	3.66571e-11
949	AT1G09880	7	6	0	2	4	0	AT1G09880	4.59891	7.15579	2.04203	0.285368	-1.8091	0.16319	0.321135
950	AT1G09890	2	0	3	1	0	1	AT1G09890	2.43298	3.65198	1.21399	0.332419	-1.58892	0.409517	0.64058
951	AT1G09900	62	62	57	170	223	176	AT1G09900	109.835	84.0493	135.62	1.61358	0.690267	0.00396005	0.0125
952	AT1G09910	57	116	92	346	326	265	AT1G09910	173.142	124.142	222.142	1.78941	0.839487	0.000496236	0.00184661
953	AT1G09920	199	168	132	246	272	212	AT1G09920	200.527	227.745	173.309	0.760977	-0.394075	0.0214176	0.0569087
954	AT1G09930	6	7	6	0	4	2	AT1G09930	6.10315	10.0761	2.13024	0.211416	-2.24184	0.0445682	0.10802
955	AT1G09932	14	13	12	14	20	10	AT1G09932	15.0586	19.153	10.9643	0.572457	-0.80476	0.234281	0.427058
956	AT1G09935	0	0	0	0	0	0	AT1G09935	1.04405	1.37209	0.716013	0.52184	-0.938321	0.86677	0.937107
957	AT1G09940	1003	773	834	3787	3832	3218	AT1G09940	1878.07	1188.29	2567.85	2.16096	1.11167	5.97037e-68	4.62763e-66
958	AT1G09950	313	289	285	705	716	574	AT1G09950	439.261	406.125	472.397	1.16318	0.218076	0.0674413	0.154432
959	AT1G09960	3010	2729	2827	4181	4390	3572	AT1G09960	3393.11	3911.34	2874.87	0.73501	-0.444165	2.00503e-19	2.90153e-18
960	AT1G09970	1623	1540	1500	4656	4859	4017	AT1G09970	2667.92	2130.3	3205.54	1.50474	0.589513	1.34647e-27	3.05522e-26
961	AT1G09980	83	62	60	286	302	251	AT1G09980	146.924	94.3507	199.498	2.11443	1.08027	3.30734e-07	1.86873e-06
962	AT1G09995	2	0	15	20	14	17	AT1G09995	11.1545	9.39407	12.9149	1.3748	0.459217	0.653335	0.863473
963	AT1G10000	79	60	57	91	104	65	AT1G10000	75.9721	90.2836	61.6606	0.682966	-0.550114	0.0535627	0.126364
964	AT1G10010	6	3	0	0	0	0	AT1G10010	3.0177	5.31939	0.716013	0.134604	-2.8932	0.0897131	0.196273
965	AT1G10020	124	162	125	90	96	82	AT1G10020	127.1	189.904	64.2971	0.338578	-1.56244	2.83096e-09	1.9548e-08
966	AT1G10030	50	63	58	154	140	106	AT1G10030	87.4263	79.9331	94.9196	1.18749	0.247913	0.326253	0.548581
967	AT1G10040	23	13	24	68	53	61	AT1G10040	36.4659	28.6947	44.2371	1.54165	0.624471	0.148677	0.299269
968	AT1G10050	36	55	58	190	215	180	AT1G10050	104.875	70.2513	139.499	1.98571	0.989658	4.60903e-05	0.000200629
969	AT1G10060	10	6	7	4	6	16	AT1G10060	9.52026	11.7719	7.26862	0.617456	-0.695591	0.367784	0.589764
970	AT1G10070	14	20	19	30	25	19	AT1G10070	21.9636	25.8024	18.1248	0.702446	-0.50954	0.377468	0.602252
971	AT1G10090	83	104	123	258	324	239	AT1G10090	169.492	144.296	194.688	1.34923	0.432137	0.0322087	0.0814679
972	AT1G10095	52	23	56	71	50	53	AT1G10095	51.5298	60.9642	42.0954	0.690494	-0.5343	0.224371	0.412532
973	AT1G10100	0	0	0	0	0	0	AT1G10100	1.04405	1.37209	0.716013	0.52184	-0.938321	0.86677	0.937107
974	AT1G10110	9	6	3	12	33	10	AT1G10110	11.3903	9.43567	13.3449	1.4143	0.500089	0.542078	0.768536
975	AT1G10120	51	62	36	83	116	104	AT1G10120	71.1944	69.3567	73.0322	1.05299	0.0744976	0.842715	0.937107
976	AT1G10130	116	143	218	558	539	482	AT1G10130	298.79	222.071	375.51	1.69095	0.757831	0.00251956	0.00825472
977	AT1G10140	8	4	17	15	12	3	AT1G10140	11.1597	14.7698	7.54961	0.511152	-0.968175	0.308567	0.524516
978	AT1G10150	168	103	186	241	269	235	AT1G10150	193.805	209.856	177.754	0.84703	-0.239515	0.392778	0.621166
979	AT1G10155	4	0	1	0	0	0	AT1G10155	2.12767	3.53933	0.716013	0.202302	-2.30542	0.266256	0.46775
980	AT1G10170	983	1053	957	2552	2668	2195	AT1G10170	1563.6	1370.7	1756.51	1.28147	0.357804	2.42203e-07	1.38782e-06
981	AT1G10180	75	58	54	429	533	313	AT1G10180	192.669	86.2166	299.121	3.46941	1.79469	7.35975e-15	8.022e-14
982	AT1G10190	17	10	9	3	2	0	AT1G10190	9.70134	17.5698	1.83289	0.104321	-3.2609	0.000371226	0.00141213
983	AT1G10200	256	160	155	341	344	290	AT1G10200	245.376	259.044	231.708	0.894472	-0.160892	0.383849	0.609917
984	AT1G10210	8	26	13	54	70	69	AT1G10210	35.0808	23.2267	46.9349	2.02074	1.01488	0.0187128	0.0505562
985	AT1G10220	0	0	4	4	7	0	AT1G10220	3.21807	3.28612	3.15002	0.958582	-0.0610269	1	1
986	AT1G10230	93	61	87	152	149	100	AT1G10230	102.911	111.021	94.8018	0.85391	-0.227843	0.367193	0.589059
987	AT1G10240	46	32	29	205	159	123	AT1G10240	82.4989	49.7541	115.244	2.31626	1.2118	1.8569e-05	8.4806e-05
988	AT1G10250	0	1	1	0	1	2	AT1G10250	1.89907	2.32201	1.47613	0.635714	-0.65355	0.834352	0.937107
989	AT1G10270	134	111	108	420	491	309	AT1G10270	224.393	161.949	286.837	1.77115	0.824689	8.52737e-07	4.60217e-06
990	AT1G10280	43	15	60	146	116	86	AT1G10280	68.8789	55.3074	82.4504	1.49077	0.576053	0.212932	0.395644
991	AT1G10290	493	349	436	1522	1729	1352	AT1G10290	836.101	582.657	1089.54	1.86996	0.903007	7.21425e-21	1.12155e-19
992	AT1G10300	3	6	0	7	3	2	AT1G10300	4.48391	5.46706	3.50075	0.640335	-0.643101	0.660326	0.868
993	AT1G10310	89	96	112	216	212	168	AT1G10310	139.643	137.794	141.493	1.02684	0.0382162	0.81551	0.937107
994	AT1G10320	108	70	58	155	177	115	AT1G10320	106.686	107.719	105.653	0.980819	-0.027941	0.881519	0.949355
995	AT1G10330	31	16	23	37	61	25	AT1G10330	31.0984	33.0079	29.1889	0.884302	-0.177389	0.725609	0.903601
996	AT1G10340	9	24	26	104	91	117	AT1G10340	52.3985	28.9266	75.8704	2.62286	1.39114	0.00052438	0.00194478
997	AT1G10350	106	60	89	199	189	181	AT1G10350	126.569	116.995	136.144	1.16367	0.218685	0.367099	0.588989
998	AT1G10360	12	5	6	4	7	2	AT1G10360	7.67922	11.6663	3.6921	0.316475	-1.65984	0.0823466	0.182958
999	AT1G10370	197	238	200	721	726	609	AT1G10370	390.066	292.438	487.695	1.66769	0.737851	6.47805e-09	4.32707e-08
1000	AT1G10380	11	2	0	0	2	0	AT1G10380	4.05549	6.9589	1.15209	0.165556	-2.59461	0.161036	0.317975
1001	AT1G10385	11	4	2	0	0	1	AT1G10385	4.92289	8.85872	0.987053	0.111422	-3.1659	0.0135601	0.0380445
1002	AT1G10390	1191	1023	1181	2308	2494	1855	AT1G10390	1561.3	1551.55	1571.05	1.01256	0.0180132	0.773063	0.937107
1003	AT1G10400	1	5	3	4	2	1	AT1G10400	3.95884	5.58682	2.33087	0.417209	-1.26116	0.402897	0.633853
1004	AT1G10410	148	108	148	444	436	347	AT1G10410	238.088	185.586	290.591	1.5658	0.646902	6.91921e-05	0.000293948
1005	AT1G10417	0	0	5	0	1	0	AT1G10417	2.34934	3.76463	0.934051	0.248112	-2.01094	0.337181	0.558285
1006	AT1G10430	255	211	237	556	629	489	AT1G10430	359.239	321.901	396.576	1.23198	0.300982	0.023067	0.060875
1007	AT1G10450	82	64	40	172	206	117	AT1G10450	100.839	85.3011	116.376	1.3643	0.448161	0.106596	0.227419
1008	AT1G10455	0	0	0	0	0	0	AT1G10455	1.04405	1.37209	0.716013	0.52184	-0.938321	0.86677	0.937107
1009	AT1G10460	11	6	8	8	12	10	AT1G10460	10.2655	12.6726	7.85835	0.620107	-0.689411	0.389822	0.61746
1010	AT1G10470	518	519	474	1199	1173	984	AT1G10470	743.403	691.534	795.273	1.15001	0.201651	0.0296042	0.0757535
1011	AT1G10480	2	1	4	0	0	0	AT1G10480	2.65895	4.60189	0.716013	0.155591	-2.68417	0.154793	0.308937
1012	AT1G10490	206	177	173	435	412	412	AT1G10490	277.747	254.562	300.933	1.18216	0.241426	0.125606	0.26038
1013	AT1G10500	323	255	303	492	371	382	AT1G10500	349.865	402.933	296.797	0.736593	-0.44106	0.00343262	0.0109597
1014	AT1G10510	47	50	74	257	294	213	AT1G10510	130.534	80.1944	180.873	2.25543	1.1734	9.13238e-08	5.46416e-07
1015	AT1G10520	3	4	0	17	21	16	AT1G10520	9.0068	4.52426	13.4893	2.98156	1.57607	0.089326	0.195574
1016	AT1G10522	230	183	240	376	322	279	AT1G10522	265.727	299.583	231.872	0.773983	-0.369625	0.0235976	0.0620706
1017	AT1G10530	20	10	2	91	60	34	AT1G10530	29.5758	15.4868	43.6647	2.81949	1.49543	0.0243354	0.0638325
1018	AT1G10540	318	164	170	170	241	174	AT1G10540	216.643	294.282	139.003	0.472346	-1.08208	0.0056271	0.017209
1019	AT1G10550	450	382	408	287	318	270	AT1G10550	387.512	566.661	208.363	0.367703	-1.44339	2.77945e-29	6.66822e-28
1020	AT1G10560	0	4	5	0	18	0	AT1G10560	5.14547	5.65025	4.64069	0.821325	-0.283974	0.964799	1
1021	AT1G10570	40	56	13	78	73	65	AT1G10570	51.415	50.8786	51.9513	1.02108	0.0301017	0.989004	1
1022	AT1G10580	350	271	265	1025	1100	885	AT1G10580	558.364	403.691	713.037	1.76629	0.820726	6.18005e-14	6.26607e-13
1023	AT1G10585	3	0	0	0	0	0	AT1G10585	1.67733	2.63864	0.716013	0.271357	-1.88173	0.438633	0.662565
1024	AT1G10586	1	0	1	0	1	0	AT1G10586	1.60342	2.27278	0.934051	0.410972	-1.28289	0.652491	0.863473
1025	AT1G10588	0	0	0	0	0	0	AT1G10588	1.04405	1.37209	0.716013	0.52184	-0.938321	0.86677	0.937107
1026	AT1G10590	693	691	515	1722	1876	1561	AT1G10590	1044.87	866.116	1223.63	1.41278	0.498537	5.55328e-06	2.70418e-05
1027	AT1G10600	18	26	39	125	168	95	AT1G10600	65.6759	39.8897	91.4621	2.29288	1.19716	0.000192917	0.00076542
1028	AT1G10610	30	85	74	144	154	82	AT1G10610	89.3571	89.5165	89.1978	0.99644	-0.00514544	0.926098	0.979752
1029	AT1G10620	1	0	0	0	0	0	AT1G10620	1.25514	1.79427	0.716013	0.399054	-1.32534	0.696842	0.878823
1030	AT1G10630	552	427	536	1152	1209	982	AT1G10630	742.05	692.186	791.914	1.14408	0.194185	0.0502292	0.119557
1031	AT1G10640	37	20	22	6	11	4	AT1G10640	21.2541	36.9481	5.5602	0.150487	-2.73229	2.75875e-06	1.40027e-05
1032	AT1G10650	272	163	272	448	434	367	AT1G10650	309.841	323.198	296.483	0.917341	-0.12447	0.587946	0.801225
1033	AT1G10652	0	0	0	0	0	0	AT1G10652	1.04405	1.37209	0.716013	0.52184	-0.938321	0.86677	0.937107
1034	AT1G10657	5	2	2	3	0	0	AT1G10657	3.38982	5.38282	1.39682	0.259495	-1.94622	0.20909	0.390978
1035	AT1G10660	314	252	314	795	864	697	AT1G10660	480.706	402.982	558.429	1.38574	0.470658	4.40432e-05	0.000192149
1036	AT1G10670	768	616	553	2418	2309	1819	AT1G10670	1213.26	880.607	1545.92	1.75551	0.811892	2.23897e-18	3.0533e-17
1037	AT1G10680	4	3	6	0	2	0	AT1G10680	4.24908	7.34608	1.15209	0.15683	-2.67272	0.060608	0.140799
1038	AT1G10690	29	33	15	30	72	27	AT1G10690	33.4451	36.3493	30.5409	0.840205	-0.251187	0.668777	0.876685
1039	AT1G10700	148	157	86	555	528	382	AT1G10700	262.172	179.017	345.326	1.92901	0.947863	3.79126e-06	1.88634e-05
1040	AT1G10710	7	8	3	4	8	1	AT1G10710	6.58661	9.53412	3.6391	0.381692	-1.38952	0.195262	0.372688
1041	AT1G10717	14	2	8	0	1	0	AT1G10717	6.49378	12.0535	0.934051	0.0774921	-3.68981	0.00244494	0.00803541
1042	AT1G10720	123	136	127	434	388	300	AT1G10720	221.649	178.182	265.117	1.4879	0.573276	0.000518696	0.00192543
1043	AT1G10730	25	19	28	117	122	100	AT1G10730	57.6268	34.2815	80.9721	2.36197	1.23999	0.000236605	0.000926198
1044	AT1G10740	260	197	289	533	573	506	AT1G10740	363.025	342.295	383.754	1.12112	0.164945	0.359208	0.579152
1045	AT1G10745	12	18	13	0	0	0	AT1G10745	10.9301	21.1441	0.716013	0.0338634	-4.88413	9.12028e-07	4.90077e-06
1046	AT1G10747	0	0	0	0	0	0	AT1G10747	1.04405	1.37209	0.716013	0.52184	-0.938321	0.86677	0.937107
1047	AT1G10750	0	5	10	25	31	21	AT1G10750	13.6773	8.51419	18.8404	2.21282	1.14589	0.0933085	0.203182
1048	AT1G10760	345	268	259	1687	1817	1445	AT1G10760	784.339	397.294	1171.38	2.9484	1.55993	1.36607e-59	8.74479e-58
1049	AT1G10770	15	9	12	0	1	2	AT1G10770	9.58284	17.6895	1.47613	0.0834466	-3.583	0.000120725	0.000493529
1050	AT1G10780	12	5	4	39	41	13	AT1G10780	16.3694	10.7093	22.0296	2.05704	1.04057	0.111015	0.235114
1051	AT1G10790	2	0	3	0	1	0	AT1G10790	2.29301	3.65198	0.934051	0.255766	-1.96711	0.337471	0.558285
1052	AT1G10800	0	0	0	1	0	0	AT1G10800	1.15752	1.37209	0.942948	0.687233	-0.541128	0.968234	1
1053	AT1G10810	0	6	7	51	18	20	AT1G10810	14.5926	7.55007	21.6352	2.86556	1.51882	0.0719925	0.163274
1054	AT1G10820	171	142	144	309	443	264	AT1G10820	224.197	209.41	238.984	1.14123	0.190588	0.273095	0.476332
1055	AT1G10830	226	161	233	305	266	271	AT1G10830	242.777	284.173	201.381	0.708656	-0.496843	0.0177662	0.0483201
1056	AT1G10840	430	299	378	1708	1761	1400	AT1G10840	828.239	504.736	1151.74	2.28187	1.19022	1.62273e-38	5.45037e-37
1057	AT1G10850	124	61	84	238	257	181	AT1G10850	141.247	122.673	159.821	1.30282	0.381637	0.114081	0.240726
1058	AT1G10865	131	81	92	181	222	133	AT1G10865	132.564	138.884	126.244	0.908987	-0.137669	0.519795	0.75277
1059	AT1G10870	59	66	44	296	304	199	AT1G10870	133.279	78.4478	188.109	2.39789	1.26177	1.01255e-08	6.65236e-08
1060	AT1G10880	0	0	1	0	1	0	AT1G10880	1.39233	1.8506	0.934051	0.504728	-0.986421	0.799552	0.937107
1061	AT1G10890	179	164	155	476	540	402	AT1G10890	281.929	228.422	335.436	1.46849	0.554337	0.00020093	0.000794665
1062	AT1G10900	103	68	48	375	458	348	AT1G10900	189.94	99.8806	280	2.80335	1.48715	6.01215e-15	6.59543e-14
1063	AT1G10910	51	34	18	77	72	81	AT1G10910	51.6936	47.5442	55.843	1.17455	0.232106	0.630775	0.844094
1064	AT1G10920	1	0	8	0	2	0	AT1G10920	3.38721	5.62234	1.15209	0.204913	-2.28692	0.275909	0.479573
1065	AT1G10930	29	15	17	74	76	79	AT1G10930	42.1567	28.821	55.4923	1.92541	0.945164	0.020127	0.0538688
1066	AT1G10940	501	471	412	1521	1499	1202	AT1G10940	815.287	632.062	998.513	1.57977	0.659717	2.95578e-13	2.85564e-12
1067	AT1G10950	2028	1961	2012	3262	3272	2719	AT1G10950	2468.05	2744.74	2191.36	0.798385	-0.324844	7.19693e-08	4.35788e-07
1068	AT1G10960	2674	2226	2375	3169	3368	2674	AT1G10960	2747.54	3316.09	2178.99	0.657096	-0.605825	3.89338e-30	9.62066e-29
1069	AT1G10970	1093	1138	1113	1643	1811	1452	AT1G10970	1346.92	1531.85	1161.99	0.75855	-0.398684	5.07534e-06	2.48703e-05
1070	AT1G10980	5	0	0	0	0	0	AT1G10980	2.09951	3.483	0.716013	0.205574	-2.28227	0.266868	0.46775
1071	AT1G10990	4	8	6	19	20	4	AT1G10990	10.0879	9.7031	10.4727	1.07931	0.110115	0.881666	0.949417
1072	AT1G11000	33	58	39	281	269	196	AT1G11000	118.784	61.3073	176.261	2.87504	1.52358	8.54943e-11	6.78715e-10
1073	AT1G11020	175	180	159	364	411	342	AT1G11020	250.91	236.189	265.63	1.12465	0.169473	0.284034	0.490257
1074	AT1G11040	2	0	0	0	0	0	AT1G11040	1.46623	2.21646	0.716013	0.323044	-1.6302	0.555354	0.768536
1075	AT1G11050	203	225	200	607	478	407	AT1G11050	320.922	288.842	353.001	1.22212	0.28939	0.0793823	0.177386
1076	AT1G11060	58	38	38	258	285	216	AT1G11060	120.953	61.9553	179.951	2.90453	1.5383	9.46979e-11	7.48287e-10
1077	AT1G11070	11	11	5	14	6	2	AT1G11070	9.66874	13.5941	5.74341	0.422494	-1.243	0.14586	0.294338
1078	AT1G11080	6	8	3	0	1	0	AT1G11080	5.023	9.11194	0.934051	0.102508	-3.28619	0.0132556	0.0372784
1079	AT1G11090	218	176	103	351	337	241	AT1G11090	222.415	225.661	219.17	0.971234	-0.0421095	0.84821	0.937107
1080	AT1G11100	26	24	14	81	68	46	AT1G11100	38.3769	30.3616	46.3922	1.52799	0.611633	0.137646	0.280172
1081	AT1G11110	0	1	0	0	0	0	AT1G11110	1.27976	1.8435	0.716013	0.388399	-1.36439	0.69833	0.878823
1082	AT1G11112	1	3	6	0	10	10	AT1G11112	5.84316	6.07953	5.60679	0.922241	-0.116785	0.985457	1
1083	AT1G11120	6	7	7	51	36	35	AT1G11120	20.09	10.5546	29.6255	2.80689	1.48897	0.0112604	0.0321627
1084	AT1G11125	46	10	27	171	178	141	AT1G11125	77.4877	38.4262	116.549	3.03307	1.60078	1.09016e-07	6.46588e-07
1085	AT1G11130	13	33	2	37	22	47	AT1G11130	25.0111	23.3738	26.6483	1.14009	0.189152	0.88157	0.949373
1086	AT1G11145	0	0	0	0	0	2	AT1G11145	1.31509	1.37209	1.25809	0.916916	-0.125139	1	1
1087	AT1G11160	17	6	7	3	0	3	AT1G11160	8.46855	14.7272	2.20994	0.150059	-2.7364	0.0029785	0.00960789
1088	AT1G11170	8	10	8	40	23	23	AT1G11170	17.1669	13.2916	21.0422	1.58312	0.662766	0.291873	0.501458
1089	AT1G11180	45	49	53	201	215	192	AT1G11180	107.039	68.83	145.248	2.11024	1.07741	1.05284e-05	4.9694e-05
1090	AT1G11190	0	4	3	0	4	1	AT1G11190	3.27622	4.69323	1.8592	0.396146	-1.3359	0.439932	0.6639
1091	AT1G11200	163	151	159	432	481	381	AT1G11200	262.173	217.452	306.894	1.41132	0.497043	0.00125128	0.00433883
1092	AT1G11210	30	26	24	73	77	65	AT1G11210	44.7335	37.7782	51.6888	1.36822	0.452297	0.241351	0.437567
1093	AT1G11220	3	3	2	2	4	0	AT1G11220	3.52595	5.00987	2.04203	0.407603	-1.29476	0.41819	0.650576
1094	AT1G11230	0	0	0	2	0	0	AT1G11230	1.27099	1.37209	1.16988	0.852627	-0.230014	1	1
1095	AT1G11240	148	148	127	170	175	180	AT1G11240	160.316	194.393	126.239	0.649399	-0.622822	0.00119466	0.0041552
1096	AT1G11250	0	1	0	0	0	0	AT1G11250	1.27976	1.8435	0.716013	0.388399	-1.36439	0.69833	0.878823
1097	AT1G11260	3133	3160	3044	3060	3116	2593	AT1G11260	3173.82	4270.28	2077.35	0.486467	-1.03959	8.79195e-44	3.50724e-42
1098	AT1G11270	19	23	14	66	134	81	AT1G11270	46.9	26.9349	66.8651	2.48246	1.31177	0.00250892	0.00822482
1099	AT1G11280	29	19	28	161	129	130	AT1G11280	68.2925	35.9702	100.615	2.79716	1.48396	2.50427e-06	1.2773e-05
1100	AT1G11290	10	28	10	73	101	98	AT1G11290	44.7222	23.5783	65.866	2.7935	1.48207	0.000742429	0.00268312
1101	AT1G11300	262	252	258	1212	1165	1100	AT1G11300	591.076	354.232	827.92	2.33722	1.22479	3.74119e-30	9.25298e-29
1102	AT1G11310	445	396	430	1468	1396	1233	AT1G11310	777.054	581.677	972.43	1.67177	0.741376	1.28383e-15	1.46264e-14
1103	AT1G11320	13	13	18	66	36	52	AT1G11320	29.6195	21.6018	37.6372	1.74231	0.801004	0.0901548	0.197151
1104	AT1G11330	23	9	14	34	27	8	AT1G11330	19.2556	22.024	16.4871	0.748599	-0.417735	0.492866	0.724986
1105	AT1G11340	3	1	2	2	0	0	AT1G11340	2.61847	4.06706	1.16988	0.287649	-1.79762	0.329908	0.55167
1106	AT1G11350	1	10	15	24	70	25	AT1G11350	20.9435	13.6859	28.2011	2.06059	1.04306	0.187162	0.359549
1107	AT1G11360	591	467	392	795	786	678	AT1G11360	597.437	658.602	536.272	0.814259	-0.296441	0.0261967	0.0681261
1108	AT1G11362	0	0	0	0	0	0	AT1G11362	1.04405	1.37209	0.716013	0.52184	-0.938321	0.86677	0.937107
1109	AT1G11370	1	1	0	0	1	1	AT1G11370	1.73539	2.26568	1.20509	0.53189	-0.910801	0.743955	0.916979
1110	AT1G11380	48	41	26	81	127	123	AT1G11380	66.766	53.4056	80.1265	1.50034	0.585289	0.11218	0.237248
1111	AT1G11390	313	303	176	534	545	416	AT1G11390	357.025	360.568	353.483	0.98035	-0.0286307	0.880078	0.948066
1112	AT1G11400	150	132	95	271	239	195	AT1G11400	169.781	172.383	167.179	0.969814	-0.0442204	0.797264	0.937107
1113	AT1G11410	36	53	53	136	137	115	AT1G11410	79.768	66.916	92.62	1.38412	0.468973	0.0830863	0.184391
1114	AT1G11420	8	1	10	11	6	11	AT1G11420	8.754	10.006	7.50197	0.749745	-0.415528	0.640713	0.85443
1115	AT1G11430	304	358	384	705	773	618	AT1G11430	489.488	482.225	496.751	1.03012	0.0428176	0.719639	0.898426
1116	AT1G11440	75	48	57	225	161	126	AT1G11440	101.985	82.938	121.032	1.4593	0.545277	0.0497699	0.11863
1117	AT1G11450	3	0	2	0	0	0	AT1G11450	2.15583	3.59565	0.716013	0.199133	-2.3282	0.265648	0.46775
1118	AT1G11460	1	0	0	0	0	0	AT1G11460	1.25514	1.79427	0.716013	0.399054	-1.32534	0.696842	0.878823
1119	AT1G11470	0	0	0	0	0	0	AT1G11470	1.04405	1.37209	0.716013	0.52184	-0.938321	0.86677	0.937107
1120	AT1G11475	133	91	115	76	100	67	AT1G11475	106.687	155.448	57.9266	0.372642	-1.42414	4.19728e-09	2.8605e-08
1121	AT1G11480	437	327	310	1927	2021	1598	AT1G11480	900.074	488.352	1311.8	2.68617	1.42555	3.45234e-57	2.10593e-55
1122	AT1G11490	0	0	0	0	0	0	AT1G11490	1.04405	1.37209	0.716013	0.52184	-0.938321	0.86677	0.937107
1123	AT1G11500	0	0	1	0	0	0	AT1G11500	1.28331	1.8506	0.716013	0.386908	-1.36994	0.698542	0.878823
1124	AT1G11510	0	2	0	0	0	0	AT1G11510	1.51546	2.3149	0.716013	0.309306	-1.69289	0.55626	0.768536
1125	AT1G11520	4	4	1	0	0	0	AT1G11520	3.07048	5.42494	0.716013	0.131985	-2.92155	0.088873	0.194755
1126	AT1G11530	55	70	66	74	82	54	AT1G11530	69.5982	89.1719	50.0245	0.560989	-0.833955	0.00644632	0.0194323
1127	AT1G11540	17	3	2	0	2	4	AT1G11540	6.57833	10.9204	2.23625	0.204777	-2.28787	0.126807	0.262471
1128	AT1G11545	6	10	14	32	18	29	AT1G11545	17.5406	15.3183	19.7628	1.29014	0.367527	0.561846	0.774032
1129	AT1G11560	0	0	0	0	0	1	AT1G11560	1.17957	1.37209	0.987053	0.719378	-0.475179	0.972199	1
1130	AT1G11570	0	0	0	0	0	0	AT1G11570	1.04405	1.37209	0.716013	0.52184	-0.938321	0.86677	0.937107
1131	AT1G11572	0	2	0	0	0	0	AT1G11572	1.51546	2.3149	0.716013	0.309306	-1.69289	0.55626	0.768536
1132	AT1G11580	503	422	417	2056	2387	1894	AT1G11580	1056.65	612.2	1501.1	2.45198	1.29395	1.54019e-55	8.89648e-54
1133	AT1G11590	139	114	72	12	14	8	AT1G11590	78.454	148.248	8.66008	0.0584162	-4.09749	1.99468e-16	2.38957e-15
1134	AT1G11593	21	8	7	4	0	0	AT1G11593	9.49122	17.3587	1.62375	0.0935412	-3.41825	0.00059382	0.00218023
1135	AT1G11600	14	7	5	18	8	19	AT1G11600	12.335	12.975	11.6949	0.901342	-0.149854	0.799883	0.937107
1136	AT1G11608	0	2	0	0	0	0	AT1G11608	1.51546	2.3149	0.716013	0.309306	-1.69289	0.55626	0.768536
1137	AT1G11610	4	0	0	0	1	0	AT1G11610	1.99743	3.06082	0.934051	0.305164	-1.71234	0.423784	0.65624
1138	AT1G11620	0	0	5	0	0	0	AT1G11620	2.24032	3.76463	0.716013	0.190195	-2.39445	0.266586	0.46775
1139	AT1G11630	26	37	32	106	135	86	AT1G11630	61.3094	45.103	77.5157	1.71864	0.781265	0.012822	0.0361674
1140	AT1G11650	2033	1635	1730	6249	6538	5276	AT1G11650	3366.3	2458.23	4274.37	1.7388	0.798092	4.75375e-57	2.87401e-55
1141	AT1G11655	0	0	2	0	0	0	AT1G11655	1.52256	2.32911	0.716013	0.307419	-1.70172	0.556385	0.768536
1142	AT1G11660	109	82	96	364	434	333	AT1G11660	200.093	131.982	268.205	2.03214	1.023	1.33016e-08	8.64921e-08
1143	AT1G11670	606	551	544	1933	2036	1623	AT1G11670	1050.24	777.266	1323.2	1.70238	0.767556	1.91925e-21	3.09514e-20
1144	AT1G11680	1024	961	922	2340	2461	1841	AT1G11680	1447.6	1327.89	1567.32	1.18031	0.239165	0.000444891	0.00166764
1145	AT1G11684	1	6	0	0	0	0	AT1G11684	2.66936	4.6227	0.716013	0.154891	-2.69068	0.158706	0.314225
1146	AT1G11690	2	0	0	0	0	0	AT1G11690	1.46623	2.21646	0.716013	0.323044	-1.6302	0.555354	0.768536
1147	AT1G11700	42	54	48	90	87	73	AT1G11700	63.7117	67.5279	59.8954	0.886972	-0.173039	0.618893	0.831979
1148	AT1G11710	31	0	10	59	86	64	AT1G11710	34.7239	19.2448	50.203	2.60865	1.38331	0.0212797	0.0565753
1149	AT1G11720	81	72	61	277	321	222	AT1G11720	146.218	98.6989	193.738	1.96292	0.973002	3.29095e-06	1.65161e-05
1150	AT1G11730	2	0	0	3	3	0	AT1G11730	2.13369	2.21646	2.05093	0.92532	-0.111975	1	1
1151	AT1G11740	24	41	55	14	15	22	AT1G11740	35.1383	57.1499	13.1266	0.229686	-2.12226	0.00131043	0.00452605
1152	AT1G11750	138	138	135	311	389	272	AT1G11750	209.559	189.285	229.832	1.21421	0.280019	0.0953025	0.206878
1153	AT1G11755	27	16	41	99	90	84	AT1G11755	52.7528	39.9323	65.5734	1.64211	0.715555	0.0384156	0.0948744
1154	AT1G11760	135	161	128	252	255	202	AT1G11760	181.883	195.512	168.253	0.86058	-0.216619	0.261331	0.466336
1155	AT1G11765	3	2	0	0	0	0	AT1G11765	2.14873	3.58145	0.716013	0.199923	-2.32248	0.265801	0.46775
1156	AT1G11770	5	4	10	0	2	1	AT1G11770	5.78841	10.1537	1.42313	0.140159	-2.83487	0.0174191	0.0475425
1157	AT1G11780	91	54	56	141	160	125	AT1G11780	96.7614	92.0429	101.48	1.10253	0.140817	0.642459	0.856171
1158	AT1G11785	13	3	4	25	23	16	AT1G11785	12.9648	10.1887	15.7409	1.54494	0.627549	0.437828	0.662565
1159	AT1G11790	39	34	57	227	244	175	AT1G11790	107.002	61.1398	152.864	2.50023	1.32206	6.93981e-08	4.20688e-07
1160	AT1G11800	115	76	79	138	198	134	AT1G11800	117.538	123.552	111.524	0.902649	-0.147762	0.497637	0.73052
1161	AT1G11810	4	2	4	3	4	2	AT1G11810	4.36435	5.91766	2.81105	0.475027	-1.07392	0.432404	0.662565
1162	AT1G11820	91	55	63	173	239	193	AT1G11820	120.131	95.8638	144.398	1.50628	0.590988	0.0123031	0.0348192
1163	AT1G11840	1702	1358	1475	4051	4053	3328	AT1G11840	2385.82	2065.89	2705.76	1.30973	0.38927	7.88566e-12	6.75495e-11
1164	AT1G11850	8	2	2	13	12	4	AT1G11850	7.00808	6.64937	7.36678	1.10789	0.147818	0.962894	1
1165	AT1G11860	688	708	720	2739	2805	2158	AT1G11860	1394.45	970.113	1818.79	1.87483	0.906756	1.91246e-37	6.20889e-36
1166	AT1G11870	67	74	57	241	250	190	AT1G11870	126.616	91.8171	161.414	1.758	0.813935	0.000252344	0.000984128
1167	AT1G11880	50	27	26	80	55	32	AT1G11880	43.5932	47.6503	39.5362	0.829716	-0.269311	0.519231	0.752193
1168	AT1G11890	183	145	178	299	324	261	AT1G11890	221.057	232.159	209.955	0.904359	-0.145032	0.389355	0.616864
1169	AT1G11900	0	8	34	41	52	44	AT1G11900	27.3483	21.4126	33.2841	1.55442	0.636373	0.427009	0.659095
1170	AT1G11905	64	53	58	199	187	148	AT1G11905	103.946	81.1296	126.763	1.56248	0.643835	0.0087932	0.0257798
1171	AT1G11910	7143	6631	6254	12841	13288	10798	AT1G11910	8937.13	9135.48	8738.77	0.956574	-0.064051	0.0791126	0.1769
1172	AT1G11915	1	1	1	0	6	0	AT1G11915	2.38421	2.74419	2.02424	0.737647	-0.438998	0.91615	0.97203
1173	AT1G11920	0	0	0	0	2	0	AT1G11920	1.26209	1.37209	1.15209	0.839658	-0.252127	1	1
1174	AT1G11925	0	0	0	0	0	0	AT1G11925	1.04405	1.37209	0.716013	0.52184	-0.938321	0.86677	0.937107
1175	AT1G11930	219	171	200	558	559	500	AT1G11930	327.445	270.141	384.749	1.42425	0.510203	0.000284379	0.0011007
1176	AT1G11940	16	18	20	61	55	61	AT1G11940	34.6335	26.1824	43.0846	1.64555	0.718573	0.0982888	0.212344
1177	AT1G11950	4	13	9	32	35	44	AT1G11950	20.5153	13.4956	27.535	2.04029	1.02877	0.0710623	0.161379
1178	AT1G11960	136	75	92	445	457	326	AT1G11960	213.936	138.167	289.705	2.09677	1.06817	1.202e-09	8.58083e-09
1179	AT1G11970	0	0	0	0	0	0	AT1G11970	1.04405	1.37209	0.716013	0.52184	-0.938321	0.86677	0.937107
1180	AT1G11980	0	0	0	0	0	0	AT1G11980	1.04405	1.37209	0.716013	0.52184	-0.938321	0.86677	0.937107
1181	AT1G11990	4	3	0	0	0	0	AT1G11990	2.59552	4.47503	0.716013	0.160002	-2.64384	0.156117	0.310476
1182	AT1G12000	218	172	167	577	561	461	AT1G12000	316.663	254.4	378.926	1.48949	0.574819	5.81531e-05	0.000250057
1183	AT1G12010	37	13	11	2	2	0	AT1G12010	14.9953	28.3846	1.60596	0.0565784	-4.1436	0.000586237	0.00215471
1184	AT1G12020	12	6	27	29	53	23	AT1G12020	23.6367	22.1864	25.0871	1.13074	0.177268	0.778404	0.937107
1185	AT1G12030	0	0	0	0	2	4	AT1G12030	1.80417	1.37209	2.23625	1.62981	0.704703	0.876542	0.94508
1186	AT1G12040	17	4	1	1	0	2	AT1G12040	6.19916	10.9133	1.48503	0.136075	-2.87752	0.087513	0.192456
1187	AT1G12050	193	168	124	584	569	483	AT1G12050	304.803	221.384	388.222	1.75361	0.810331	3.34874e-08	2.10115e-07
1188	AT1G12060	76	64	84	126	158	102	AT1G12060	97.6142	103.822	91.4059	0.880406	-0.183758	0.504375	0.736274
1189	AT1G12064	355	424	396	935	1105	935	AT1G12064	623.933	540.611	707.255	1.30825	0.387639	0.00586174	0.0178303
1190	AT1G12070	1	2	5	11	13	7	AT1G12070	6.53685	5.12962	7.94407	1.54867	0.631026	0.554459	0.768536
1191	AT1G12080	32	40	13	6	12	11	AT1G12080	23.8171	39.9587	7.67552	0.192086	-2.38017	0.00156741	0.00533437
1192	AT1G12090	437	333	371	620	611	487	AT1G12090	463.501	520.369	406.633	0.781432	-0.355807	0.00204799	0.00682478
1193	AT1G12100	0	0	0	0	0	0	AT1G12100	1.04405	1.37209	0.716013	0.52184	-0.938321	0.86677	0.937107
1194	AT1G12110	426	379	395	1010	1085	793	AT1G12110	615.16	548.894	681.426	1.24145	0.31203	0.00196717	0.00657801
1195	AT1G12120	169	173	131	517	572	519	AT1G12120	300.194	216.958	383.429	1.76729	0.821542	2.48079e-08	1.57803e-07
1196	AT1G12130	72	66	72	567	650	401	AT1G12130	238.567	97.3344	379.8	3.90201	1.96422	1.21546e-23	2.23582e-22
1197	AT1G12140	100	69	79	227	268	243	AT1G12140	145.223	113.919	176.527	1.54958	0.631879	0.00304915	0.00981487
1198	AT1G12150	12	2	0	1	8	0	AT1G12150	5.03416	7.38108	2.68725	0.364073	-1.4577	0.376872	0.60157
1199	AT1G12160	30	53	33	161	154	136	AT1G12160	81.2523	54.8127	107.692	1.96472	0.974326	0.00044542	0.00166924
1200	AT1G12170	8	6	0	0	0	2	AT1G12170	4.41803	7.57797	1.25809	0.16602	-2.59057	0.0469275	0.112973
1201	AT1G12180	16	13	5	0	4	0	AT1G12180	9.11798	16.6478	1.58816	0.0953979	-3.3899	0.000403485	0.00152503
1202	AT1G12190	3	2	1	0	3	0	AT1G12190	2.71504	4.05995	1.37013	0.337473	-1.56715	0.393495	0.621939
1203	AT1G12200	410	482	432	1258	1341	1073	AT1G12200	738.907	608.399	869.415	1.42902	0.515028	1.15699e-07	6.84733e-07
1204	AT1G12210	9	9	6	43	44	44	AT1G12210	22.1395	12.2854	31.9937	2.6042	1.38084	0.0142529	0.039734
1205	AT1G12211	0	0	0	0	0	0	AT1G12211	1.04405	1.37209	0.716013	0.52184	-0.938321	0.86677	0.937107
1206	AT1G12220	23	36	52	96	104	88	AT1G12220	60.9822	52.9352	69.0293	1.30403	0.38298	0.229001	0.419344
1207	AT1G12230	242	157	228	490	506	395	AT1G12230	307.976	286.65	329.302	1.14879	0.200121	0.220429	0.406742
1208	AT1G12240	27	27	39	104	119	83	AT1G12240	58.4604	44.1607	72.7601	1.64762	0.720384	0.0252792	0.0660215
1209	AT1G12244	17	15	17	21	58	29	AT1G12244	24.8714	23.7549	25.988	1.09401	0.129623	0.807574	0.937107
1210	AT1G12250	3	16	18	25	26	23	AT1G12250	18.5433	18.7942	18.2923	0.973292	-0.0390547	1	1
1211	AT1G12260	5	1	1	0	0	0	AT1G12260	2.57446	4.43291	0.716013	0.161522	-2.6302	0.156562	0.311066
1212	AT1G12270	133	74	133	280	251	219	AT1G12270	167.195	156.048	178.343	1.14288	0.192669	0.453829	0.680906
1213	AT1G12280	7	2	9	55	55	32	AT1G12280	21.7198	9.57674	33.8628	3.53594	1.8221	0.00144881	0.00496739
1214	AT1G12290	6	11	9	49	66	53	AT1G12290	26.9943	13.3972	40.5915	3.02985	1.59924	0.00148023	0.00506619
1215	AT1G12300	5	18	18	47	59	61	AT1G12300	30.6805	20.5814	40.7796	1.98138	0.986507	0.0292403	0.0749212
1216	AT1G12310	798	702	609	1910	1832	1624	AT1G12310	1117.19	960.61	1273.78	1.32601	0.40709	2.97083e-07	1.68806e-06
1217	AT1G12320	19	27	24	27	26	22	AT1G12320	26.0404	33.6056	18.4751	0.549763	-0.863119	0.0865028	0.190837
1218	AT1G12330	240	142	182	406	480	412	AT1G12330	282.951	256.723	309.178	1.20432	0.268225	0.179492	0.34734
1219	AT1G12340	0	5	2	14	10	11	AT1G12340	6.87053	4.68613	9.05492	1.93228	0.950305	0.361428	0.581935
1220	AT1G12350	63	61	35	145	167	119	AT1G12350	87.8803	73.473	102.288	1.39218	0.477348	0.0781231	0.175148
1221	AT1G12360	238	157	185	522	527	479	AT1G12360	314.148	264.386	363.91	1.37644	0.460939	0.00162817	0.00552317
1222	AT1G12370	53	32	32	166	139	147	AT1G12370	81.3411	54.1449	108.537	2.00457	1.0033	0.000507863	0.00188756
1223	AT1G12380	18	11	5	8	12	4	AT1G12380	11.3907	16.5493	6.23211	0.376577	-1.40898	0.0643755	0.148575
1224	AT1G12390	66	27	43	102	124	123	AT1G12390	73.3889	62.5398	84.238	1.34695	0.429697	0.241857	0.438225
1225	AT1G12400	90	73	94	103	107	94	AT1G12400	95.8294	118.761	72.8982	0.613824	-0.704103	0.00530697	0.0163088
1226	AT1G12410	167	192	242	553	546	477	AT1G12410	326.365	278.185	374.546	1.34639	0.429099	0.0190727	0.0514061
1227	AT1G12411	0	0	0	0	0	0	AT1G12411	1.04405	1.37209	0.716013	0.52184	-0.938321	0.86677	0.937107
1228	AT1G12420	17	24	11	121	144	130	AT1G12420	59.9671	25.1265	94.8078	3.77323	1.9158	2.57758e-08	1.63577e-07
1229	AT1G12423	0	0	0	0	0	0	AT1G12423	1.04405	1.37209	0.716013	0.52184	-0.938321	0.86677	0.937107
1230	AT1G12430	34	38	31	152	162	153	AT1G12430	80.2374	48.4734	112.001	2.31058	1.20825	2.41675e-05	0.00010857
1231	AT1G12440	1017	767	897	2420	2400	2025	AT1G12440	1421.78	1221.52	1622.05	1.32789	0.409139	1.91603e-07	1.10627e-06
1232	AT1G12450	58	23	24	88	43	71	AT1G12450	48.7454	48.1851	49.3058	1.02326	0.0331701	0.976281	1
1233	AT1G12451	0	0	0	0	0	0	AT1G12451	1.04405	1.37209	0.716013	0.52184	-0.938321	0.86677	0.937107
1234	AT1G12460	43	58	30	73	105	69	AT1G12460	60.0503	61.2226	58.878	0.961704	-0.0563346	0.902279	0.96204
1235	AT1G12470	82	90	111	364	416	367	AT1G12470	202.514	131.532	273.496	2.07932	1.05611	2.60947e-09	1.80783e-08
1236	AT1G12480	5	5	1	8	16	11	AT1G12480	7.66004	6.31853	9.00154	1.42463	0.510583	0.650169	0.863401
1237	AT1G12490	0	6	3	7	4	1	AT1G12490	4.5419	5.63604	3.44775	0.611732	-0.709028	0.664206	0.871787
1238	AT1G12500	170	122	130	134	135	100	AT1G12500	140.262	192.86	87.6644	0.454549	-1.13749	5.42854e-08	3.32933e-07
1239	AT1G12520	247	224	258	631	735	624	AT1G12520	404	334.7	473.299	1.4141	0.499881	6.67982e-05	0.00028431
1240	AT1G12530	79	109	88	58	65	34	AT1G12530	82.7411	128.216	37.2661	0.29065	-1.78264	1.46479e-08	9.49514e-08
1241	AT1G12540	0	0	3	0	0	0	AT1G12540	1.76181	2.80762	0.716013	0.255025	-1.97129	0.438219	0.662565
1242	AT1G12550	72	30	28	51	71	67	AT1G12550	52.6198	59.3095	45.9301	0.774414	-0.368824	0.415158	0.646858
1243	AT1G12560	1	1	2	0	0	0	AT1G12560	1.96935	3.22269	0.716013	0.222178	-2.17021	0.342148	0.558285
1244	AT1G12570	1	0	1	0	4	2	AT1G12570	2.20151	2.27278	2.13024	0.937285	-0.0934402	1	1
1245	AT1G12580	366	373	306	1544	1577	1223	AT1G12580	752.29	478.148	1026.43	2.14668	1.10211	4.078e-31	1.04864e-29
1246	AT1G12600	22	20	15	11	9	11	AT1G12600	17.7109	27.2658	8.15608	0.299132	-1.74114	0.00392275	0.012388
1247	AT1G12610	49	31	45	158	182	173	AT1G12610	90.675	58.2054	123.145	2.11569	1.08113	6.36241e-05	0.000271864
1248	AT1G12620	16	42	23	109	120	72	AT1G12620	55.0315	38.9317	71.1314	1.82708	0.869542	0.0145645	0.0404865
1249	AT1G12630	1	0	0	0	0	0	AT1G12630	1.25514	1.79427	0.716013	0.399054	-1.32534	0.696842	0.878823
1250	AT1G12640	127	131	133	369	413	334	AT1G12640	222.708	180.385	265.032	1.46926	0.555091	0.000850414	0.00304226
1251	AT1G12650	76	54	67	174	174	149	AT1G12650	104.75	90.9737	118.526	1.30286	0.381685	0.126	0.261038
1252	AT1G12660	0	0	0	0	1	0	AT1G12660	1.15307	1.37209	0.934051	0.680749	-0.554806	0.967425	1
1253	AT1G12663	0	0	0	0	0	0	AT1G12663	1.04405	1.37209	0.716013	0.52184	-0.938321	0.86677	0.937107
1254	AT1G12665	5	5	2	0	0	0	AT1G12665	3.75653	6.79704	0.716013	0.105342	-3.24685	0.0367544	0.0914202
1255	AT1G12672	0	6	1	0	0	0	AT1G12672	2.69752	4.67903	0.716013	0.153026	-2.70815	0.154621	0.308742
1256	AT1G12680	185	190	185	543	542	421	AT1G12680	306.896	257.566	356.226	1.38305	0.467849	0.000906372	0.00322294
1257	AT1G12700	12	4	2	15	17	18	AT1G12700	10.9932	9.2809	12.7054	1.36898	0.453106	0.660486	0.868103
1258	AT1G12710	79	74	119	298	297	267	AT1G12710	166.009	126.551	205.468	1.6236	0.699195	0.00135975	0.00468271
1259	AT1G12730	45	20	24	64	63	61	AT1G12730	43.3961	41.2825	45.5097	1.1024	0.140643	0.807669	0.937107
1260	AT1G12740	6	0	2	0	2	4	AT1G12740	3.54922	4.8622	2.23625	0.459926	-1.12053	0.41887	0.651336
1261	AT1G12750	12	10	9	94	125	78	AT1G12750	42.9513	15.4589	70.4438	4.55685	2.18804	1.23671e-07	7.30007e-07
1262	AT1G12760	451	468	506	909	880	753	AT1G12760	628.742	654.518	602.967	0.921238	-0.118355	0.333421	0.556336
1263	AT1G12770	133	85	112	377	386	319	AT1G12770	204.04	151.184	256.895	1.69922	0.764869	1.76872e-05	8.10096e-05
1264	AT1G12775	4	2	4	36	25	24	AT1G12775	13.3796	5.91766	20.8416	3.52193	1.81637	0.0151473	0.0419395
1265	AT1G12780	3296	3034	3191	10440	10953	8807	AT1G12780	5747.59	4350.04	7145.14	1.64255	0.715933	5.07253e-67	3.90944e-65
1266	AT1G12790	31	39	45	85	108	86	AT1G12790	60.6202	54.3773	66.863	1.22961	0.298204	0.336782	0.558285
1267	AT1G12800	118	105	96	697	656	545	AT1G12800	298.132	146.624	449.639	3.06662	1.61665	2.04901e-26	4.33816e-25
1268	AT1G12805	4080	3686	3821	3489	3586	2750	AT1G12805	3804.79	5289.85	2319.74	0.438526	-1.18926	1.68607e-136	4.3687e-134
1269	AT1G12810	540	410	450	1371	1614	1162	AT1G12810	808.33	637.954	978.706	1.53413	0.617422	4.97714e-11	4.02162e-10
1270	AT1G12820	201	228	246	659	628	522	AT1G12820	370.05	311.424	428.677	1.37651	0.461013	0.000297661	0.00114819
1271	AT1G12830	197	159	133	193	249	186	AT1G12830	186.178	223.137	149.219	0.668735	-0.580492	0.001145	0.00399471
1272	AT1G12840	1624	1614	1613	3341	3368	2763	AT1G12840	2230.91	2219.67	2242.14	1.01012	0.0145295	0.73942	0.915309
1273	AT1G12845	11	8	13	17	28	19	AT1G12845	15.9183	16.0079	15.8287	0.988806	-0.0162403	1	1
1274	AT1G12850	294	353	293	1268	1245	906	AT1G12850	618.796	432.102	805.489	1.86412	0.898494	2.33275e-12	2.08423e-11
1275	AT1G12855	0	2	0	0	1	0	AT1G12855	1.62448	2.3149	0.934051	0.403495	-1.30938	0.653697	0.863473
1276	AT1G12860	35	59	44	130	159	83	AT1G12860	76.1988	65.0156	87.3819	1.34401	0.426548	0.14408	0.291286
1277	AT1G12870	0	0	0	0	0	0	AT1G12870	1.04405	1.37209	0.716013	0.52184	-0.938321	0.86677	0.937107
1278	AT1G12880	74	72	67	90	71	72	AT1G12880	77.3752	98.6146	56.1358	0.569244	-0.812882	0.00375238	0.0118983
1279	AT1G12890	26	33	25	56	46	32	AT1G12890	35.9976	39.8678	32.1274	0.805848	-0.311421	0.494228	0.726573
1280	AT1G12900	199	165	195	162	189	116	AT1G12900	183.303	256.477	110.129	0.429393	-1.21963	5.98977e-11	4.81696e-10
1281	AT1G12910	445	387	470	927	1082	746	AT1G12910	622.886	596.575	649.198	1.08821	0.121955	0.285959	0.493142
1282	AT1G12920	728	682	680	2907	2972	2454	AT1G12920	1464.58	955.603	1973.56	2.06525	1.04632	4.68898e-50	2.2944e-48
1283	AT1G12930	145	180	139	363	427	302	AT1G12930	236.002	213.954	258.05	1.2061	0.27035	0.0829099	0.184074
1284	AT1G12938	0	0	0	0	0	0	AT1G12938	1.04405	1.37209	0.716013	0.52184	-0.938321	0.86677	0.937107
1285	AT1G12940	70	21	28	0	5	0	AT1G12940	28.0143	54.2225	1.8062	0.0333109	-4.90786	5.50319e-05	0.000237391
1286	AT1G12950	17	12	24	13	15	5	AT1G12950	16.9911	25.6902	8.29194	0.322766	-1.63144	0.010811	0.0309799
1287	AT1G12960	4	0	0	0	0	0	AT1G12960	1.88842	3.06082	0.716013	0.233929	-2.09586	0.343495	0.558285
1288	AT1G12970	166	124	178	295	285	271	AT1G12970	209.169	215.083	203.255	0.945007	-0.0816038	0.649155	0.862398
1289	AT1G12980	4	3	6	0	2	0	AT1G12980	4.24908	7.34608	1.15209	0.15683	-2.67272	0.060608	0.140799
1290	AT1G12990	153	140	175	268	362	247	AT1G12990	211.556	215.701	207.411	0.961567	-0.0565407	0.808821	0.937107
1291	AT1G13000	40	16	27	75	45	60	AT1G13000	41.2659	38.7215	43.8103	1.13142	0.178133	0.743099	0.916979
1292	AT1G13020	328	290	279	1217	1192	983	AT1G13020	606.644	410.058	803.23	1.95882	0.969983	2.38685e-20	3.6116e-19
1293	AT1G13030	17	15	17	42	35	32	AT1G13030	25.1534	23.7549	26.5519	1.11775	0.160592	0.779013	0.937107
1294	AT1G13040	2	7	2	27	25	21	AT1G13040	12.2297	6.4733	17.986	2.7785	1.4743	0.0529615	0.125087
1295	AT1G13050	4	5	10	4	48	19	AT1G13050	13.7211	10.2029	17.2393	1.68965	0.756722	0.456771	0.684037
1296	AT1G13060	1092	857	868	3208	3276	2486	AT1G13060	1699.28	1281.73	2116.82	1.65153	0.723805	2.7145e-28	6.32825e-27
1297	AT1G13080	803	848	810	2711	2894	2191	AT1G13080	1484.26	1127.73	1840.79	1.6323	0.706907	5.11662e-25	1.01091e-23
1298	AT1G13090	67	60	42	193	253	201	AT1G13090	116.098	78.0398	154.157	1.97536	0.982119	3.56335e-05	0.000157224
1299	AT1G13100	0	3	0	1	4	4	AT1G13100	2.84278	2.78631	2.89926	1.04054	0.0573308	1	1
1300	AT1G13110	17	21	21	12	27	10	AT1G13110	20.267	28.4973	12.0367	0.422378	-1.24339	0.032898	0.0830339
1301	AT1G13120	49	47	46	111	159	90	AT1G13120	75.5969	66.2263	84.9674	1.28299	0.359505	0.197753	0.376519
1302	AT1G13130	1	17	21	0	4	2	AT1G13130	10.9935	19.8568	2.13024	0.10728	-3.22054	0.0273583	0.0706981
1303	AT1G13140	15	6	3	18	14	18	AT1G13140	12.3504	11.9688	12.7321	1.06378	0.0891963	1	1
1304	AT1G13150	0	4	2	10	4	7	AT1G13150	4.98476	4.21473	5.7548	1.3654	0.449326	0.753779	0.924383
1305	AT1G13160	72	102	113	331	359	329	AT1G13160	188.602	133.924	243.279	1.81655	0.861202	1.86369e-05	8.50588e-05
1306	AT1G13170	99	83	104	363	341	315	AT1G13170	187.441	132.059	242.822	1.83873	0.878712	1.96837e-06	1.0177e-05
1307	AT1G13180	94	86	77	287	310	321	AT1G13180	169.443	118.443	220.442	1.86117	0.896206	5.42388e-06	2.64638e-05
1308	AT1G13190	414	264	309	1254	1218	981	AT1G13190	632.609	448.465	816.753	1.82122	0.864905	1.46454e-13	1.44678e-12
1309	AT1G13195	60	44	26	89	96	64	AT1G13195	59.5387	59.886	59.1914	0.988403	-0.0168294	0.940855	0.990822
1310	AT1G13200	0	0	0	0	0	0	AT1G13200	1.04405	1.37209	0.716013	0.52184	-0.938321	0.86677	0.937107
1311	AT1G13210	640	572	532	2360	2529	1966	AT1G13210	1208.17	795.777	1620.57	2.03646	1.02606	6.51663e-41	2.38295e-39
1312	AT1G13220	105	64	63	110	132	96	AT1G13220	93.2484	106.017	80.4797	0.759121	-0.397598	0.106672	0.227509
1313	AT1G13230	6	4	0	0	5	6	AT1G13230	4.61162	5.7908	3.43244	0.592741	-0.754526	0.530749	0.762183
1314	AT1G13245	77	107	92	187	158	145	AT1G13245	122.623	128.343	116.904	0.910869	-0.134685	0.596917	0.811172
1315	AT1G13250	40	30	9	0	8	0	AT1G13250	19.5842	36.708	2.46032	0.0670239	-3.89918	0.000231757	0.000908658
1316	AT1G13260	259	299	203	452	446	345	AT1G13260	321.424	348.804	294.044	0.843007	-0.246383	0.203382	0.384283
1317	AT1G13270	121	75	74	254	278	205	AT1G13270	148.878	123.221	174.535	1.41644	0.502271	0.0173831	0.0474727
1318	AT1G13280	585	459	581	1616	1557	1219	AT1G13280	890.031	742.736	1037.33	1.39663	0.481949	6.28748e-06	3.04481e-05
1319	AT1G13290	3	3	8	0	0	0	AT1G13290	4.29846	7.88091	0.716013	0.0908541	-3.4603	0.0195174	0.0524537
1320	AT1G13300	0	2	0	0	0	0	AT1G13300	1.51546	2.3149	0.716013	0.309306	-1.69289	0.55626	0.768536
1321	AT1G13310	0	0	2	0	0	0	AT1G13310	1.52256	2.32911	0.716013	0.307419	-1.70172	0.556385	0.768536
1322	AT1G13320	185	176	164	857	882	745	AT1G13320	415.176	240.918	589.434	2.44661	1.29079	3.64686e-24	6.88047e-23
1323	AT1G13330	16	30	8	78	68	46	AT1G13330	35.9043	26.0972	45.7114	1.75158	0.808659	0.0680021	0.155496
1324	AT1G13340	134	120	82	584	645	478	AT1G13340	278.594	153.751	403.438	2.62398	1.39175	3.91147e-19	5.56566e-18
1325	AT1G13350	67	87	94	321	346	297	AT1G13350	172.576	115.65	229.502	1.98445	0.988741	2.07265e-07	1.19341e-06
1326	AT1G13360	1655	1566	1460	3563	3457	2883	AT1G13360	2240.69	2136.92	2344.45	1.09712	0.133716	0.0201257	0.0538688
1327	AT1G13370	1	0	1	0	0	0	AT1G13370	1.4944	2.27278	0.716013	0.315038	-1.6664	0.55588	0.768536
1328	AT1G13380	190	169	156	432	514	267	AT1G13380	259.546	235.901	283.191	1.20047	0.263594	0.183389	0.353575
1329	AT1G13390	984	865	785	1975	1767	1469	AT1G13390	1216.27	1200.19	1232.34	1.02679	0.0381397	0.678218	0.878823
1330	AT1G13400	0	0	0	0	0	0	AT1G13400	1.04405	1.37209	0.716013	0.52184	-0.938321	0.86677	0.937107
1331	AT1G13410	9	18	12	60	40	44	AT1G13410	27.1892	19.3991	34.9794	1.80315	0.850516	0.0799333	0.178471
1332	AT1G13420	43	33	44	117	91	89	AT1G13420	63.684	56.1366	71.2314	1.2689	0.343573	0.283243	0.489327
1333	AT1G13430	11	12	4	20	26	29	AT1G13430	16.1854	13.587	18.7839	1.38249	0.46727	0.518377	0.751277
1334	AT1G13440	11422	11246	11082	21217	22326	17773	AT1G13440	14964.2	15427.8	14500.7	0.93991	-0.0894055	0.0850014	0.188047
1335	AT1G13450	104	62	49	250	286	208	AT1G13450	137.069	97.9529	176.185	1.79867	0.846931	0.000135427	0.000548932
1336	AT1G13460	72	57	76	255	214	186	AT1G13460	125.332	95.0058	155.658	1.63841	0.712293	0.00144359	0.00495012
1337	AT1G13470	0	0	0	0	0	0	AT1G13470	1.04405	1.37209	0.716013	0.52184	-0.938321	0.86677	0.937107
1338	AT1G13480	0	10	0	0	2	2	AT1G13480	3.89015	6.08614	1.69417	0.278365	-1.84495	0.424227	0.65624
1339	AT1G13485	0	0	0	0	0	0	AT1G13485	1.04405	1.37209	0.716013	0.52184	-0.938321	0.86677	0.937107
1340	AT1G13490	0	1	2	0	0	0	AT1G13490	1.75826	2.80051	0.716013	0.255672	-1.96763	0.438238	0.662565
1341	AT1G13500	2	0	1	0	0	0	AT1G13500	1.70549	2.69496	0.716013	0.265686	-1.91221	0.438502	0.662565
1342	AT1G13510	15	0	0	10	4	2	AT1G13510	6.0522	7.70481	4.3996	0.571019	-0.808389	0.630121	0.843406
1343	AT1G13520	146	115	91	209	266	230	AT1G13520	164.625	160.766	168.483	1.048	0.0676363	0.813146	0.937107
1344	AT1G13530	60	89	100	197	174	158	AT1G13530	121.347	116.509	126.185	1.08305	0.115104	0.618313	0.831488
1345	AT1G13540	14	25	48	70	41	61	AT1G13540	42.0553	42.0361	42.0745	1.00091	0.00131611	0.983352	1
1346	AT1G13550	9	12	11	19	16	31	AT1G13550	16.5054	16.0922	16.9186	1.05136	0.0722548	0.984912	1
1347	AT1G13560	235	206	199	575	675	561	AT1G13560	361.675	292.917	430.433	1.46947	0.555296	3.28257e-05	0.000145449
1348	AT1G13570	110	107	100	376	445	339	AT1G13570	210.528	146.103	274.953	1.88191	0.912199	1.55797e-07	9.12116e-07
1349	AT1G13580	48	36	41	140	160	140	AT1G13580	81.7724	58.2262	105.319	1.80878	0.855021	0.00245865	0.00807362
1350	AT1G13590	449	334	430	324	300	244	AT1G13590	379.963	554.139	205.788	0.371366	-1.42909	4.9237e-16	5.73925e-15
1351	AT1G13600	4	4	0	3	0	4	AT1G13600	3.71371	4.94644	2.48098	0.501569	-0.99548	0.475445	0.705133
1352	AT1G13605	42	29	23	11	2	0	AT1G13605	23.7142	43.7801	3.64837	0.0833341	-3.58495	1.10058e-09	7.88164e-09
1353	AT1G13607	10	1	0	0	1	0	AT1G13607	3.49968	6.06531	0.934051	0.153999	-2.69901	0.187998	0.360951
1354	AT1G13608	2	2	0	0	0	0	AT1G13608	1.93764	3.15926	0.716013	0.226639	-2.14153	0.342676	0.558285
1355	AT1G13609	37	26	22	13	9	15	AT1G13609	24.7353	39.7765	9.69411	0.243715	-2.03673	6.21937e-05	0.000266128
1356	AT1G13610	4	0	8	12	10	7	AT1G13610	7.20289	6.88888	7.51689	1.09116	0.125867	0.945383	0.994206
1357	AT1G13620	6	0	0	0	0	2	AT1G13620	2.58164	3.90518	1.25809	0.32216	-1.63415	0.329822	0.55167
1358	AT1G13630	9	5	3	34	29	18	AT1G13630	14.2989	8.96427	19.6336	2.19021	1.13107	0.111926	0.236813
1359	AT1G13635	8	1	6	0	0	0	AT1G13635	4.404	8.09199	0.716013	0.0884841	-3.49844	0.0147536	0.0409661
1360	AT1G13640	1094	1084	1011	6105	6492	5407	AT1G13640	2862.59	1458.01	4267.17	2.9267	1.54928	3.63989e-177	1.3382e-174
1361	AT1G13650	6	8	0	0	0	0	AT1G13650	4.19621	7.67642	0.716013	0.0932744	-3.42238	0.0204669	0.0546869
1362	AT1G13670	2	1	2	0	0	0	AT1G13670	2.18044	3.64488	0.716013	0.196444	-2.34781	0.265119	0.46775
1363	AT1G13680	1	5	1	2	0	0	AT1G13680	2.89984	4.6298	1.16988	0.252685	-1.98459	0.263895	0.46775
1364	AT1G13690	191	162	177	317	342	313	AT1G13690	237.566	243.072	232.059	0.954692	-0.0668928	0.657007	0.864841
1365	AT1G13700	11	11	8	7	9	6	AT1G13700	10.4614	15.0296	5.89314	0.392102	-1.3507	0.0935147	0.203582
1366	AT1G13710	16	8	16	36	32	19	AT1G13710	20.2835	19.5544	21.0126	1.07458	0.103768	0.877812	0.946181
1367	AT1G13730	111	83	88	384	388	289	AT1G13730	190.129	129.469	250.788	1.93705	0.953859	2.20762e-07	1.26844e-06
1368	AT1G13740	578	520	510	2387	2380	1988	AT1G13740	1167.37	734.562	1600.17	2.1784	1.12327	6.69969e-47	2.95896e-45
1369	AT1G13750	2	1	0	27	17	10	AT1G13750	7.97408	2.68786	13.2603	4.93341	2.30258	0.0250933	0.0656052
1370	AT1G13755	5	7	0	0	0	0	AT1G13755	3.74942	6.78283	0.716013	0.105563	-3.24383	0.036814	0.0915338
1371	AT1G13760	0	0	3	0	0	0	AT1G13760	1.76181	2.80762	0.716013	0.255025	-1.97129	0.438219	0.662565
1372	AT1G13770	20	20	27	170	172	149	AT1G13770	74.673	32.1635	117.182	3.64334	1.86526	9.69382e-10	6.98253e-09
1373	AT1G13780	14	19	17	153	153	135	AT1G13780	64.8806	24.3739	105.387	4.32377	2.11229	2.25827e-10	1.72872e-09
1374	AT1G13790	28	11	30	7	6	6	AT1G13790	18.9864	32.7338	5.23903	0.160049	-2.64341	0.000213906	0.000842435
1375	AT1G13800	10	2	0	7	12	2	AT1G13800	5.9999	6.53671	5.46309	0.835755	-0.258848	0.835096	0.937107
1376	AT1G13810	38	21	61	99	106	109	AT1G13810	66.1707	56.5034	75.838	1.34218	0.424582	0.327859	0.550634
1377	AT1G13820	15	17	26	33	54	21	AT1G13820	26.9153	28.1599	25.6708	0.911607	-0.133516	0.88511	0.952506
1378	AT1G13830	27	9	12	10	7	20	AT1G13830	16.3441	22.7557	9.93243	0.436481	-1.19601	0.0727538	0.164739
1379	AT1G13860	21	12	10	54	76	65	AT1G13860	33.9194	20.6798	47.159	2.28043	1.18931	0.00883768	0.0258953
1380	AT1G13870	116	56	38	255	249	180	AT1G13870	128.295	94.9271	161.663	1.70302	0.768099	0.0337344	0.0848694
1381	AT1G13880	180	173	157	693	676	595	AT1G13880	350.344	234.043	466.645	1.99384	0.995548	3.20687e-13	3.09054e-12
1382	AT1G13890	0	0	0	0	0	0	AT1G13890	1.04405	1.37209	0.716013	0.52184	-0.938321	0.86677	0.937107
1383	AT1G13900	287	212	209	428	398	341	AT1G13900	299.766	322.484	277.048	0.859106	-0.219091	0.110757	0.23466
1384	AT1G13910	8	6	2	12	7	8	AT1G13910	7.8344	8.53499	7.13382	0.835833	-0.258714	0.794319	0.937107
1385	AT1G13920	1	1	0	0	0	0	AT1G13920	1.49085	2.26568	0.716013	0.316026	-1.66189	0.555814	0.768536
1386	AT1G13930	251	254	253	254	290	237	AT1G13930	266.982	348.139	185.825	0.533767	-0.905718	3.3412e-09	2.29547e-08
1387	AT1G13940	26	31	51	200	147	147	AT1G13940	84.6819	51.3662	117.997	2.29718	1.19986	8.94743e-05	0.000373178
1388	AT1G13950	5	19	6	28	40	37	AT1G13950	20.5655	15.3107	25.8202	1.68641	0.753957	0.179597	0.347519
1389	AT1G13960	135	108	134	604	700	519	AT1G13960	302.24	173.398	431.081	2.48608	1.31387	7.38338e-19	1.03436e-17
1390	AT1G13970	4	6	10	10	11	5	AT1G13970	8.70665	10.6743	6.73898	0.631326	-0.663542	0.509618	0.741347
1391	AT1G13980	233	179	200	1064	1091	949	AT1G13980	508.547	279.823	737.271	2.63478	1.39768	3.90654e-33	1.08672e-31
1392	AT1G13990	165	122	143	510	508	418	AT1G13990	268.74	196.97	340.511	1.72875	0.789726	3.43958e-07	1.93942e-06
1393	AT1G14000	212	234	214	684	716	512	AT1G14000	377.206	303.584	450.827	1.48502	0.57048	7.3318e-06	3.51983e-05
1394	AT1G14010	113	130	135	241	233	217	AT1G14010	169.993	174.96	165.026	0.943222	-0.08433	0.693969	0.878823
1395	AT1G14020	72	72	65	395	409	356	AT1G14020	186.418	96.8133	276.023	2.85109	1.51151	1.92484e-15	2.17292e-14
1396	AT1G14030	53	36	38	187	222	194	AT1G14030	101.52	58.9015	144.139	2.44712	1.29108	5.32132e-07	2.93693e-06
1397	AT1G14040	7	4	9	54	54	47	AT1G14040	24.0015	10.5195	37.4834	3.56322	1.83318	0.000797658	0.00286672
1398	AT1G14048	0	0	0	0	0	0	AT1G14048	1.04405	1.37209	0.716013	0.52184	-0.938321	0.86677	0.937107
1399	AT1G14060	70	57	78	323	286	238	AT1G14060	148	95.1184	200.882	2.11192	1.07855	2.11976e-07	1.2195e-06
1400	AT1G14070	0	6	4	9	14	8	AT1G14070	7.04692	6.11455	7.97928	1.30497	0.384012	0.704647	0.884581
1401	AT1G14080	4	13	8	38	31	45	AT1G14080	20.6563	13.0171	28.2955	2.17371	1.12016	0.0497556	0.118606
1402	AT1G14100	0	0	4	0	0	0	AT1G14100	2.00107	3.28612	0.716013	0.21789	-2.19833	0.341621	0.558285
1403	AT1G14110	2	0	0	0	0	4	AT1G14110	2.00832	2.21646	1.80017	0.812186	-0.300118	0.9146	0.970899
1404	AT1G14120	10	0	0	0	1	1	AT1G14120	3.3995	5.59391	1.20509	0.215429	-2.21471	0.304911	0.519502
1405	AT1G14130	61	48	43	126	131	117	AT1G14130	79.9564	70.3284	89.5845	1.2738	0.349142	0.234246	0.427052
1406	AT1G14140	36	21	21	147	115	139	AT1G14140	66.6716	36.5188	96.8244	2.65136	1.40673	1.33684e-05	6.22135e-05
1407	AT1G14150	12	7	3	6	10	10	AT1G14150	9.07101	11.1736	6.9684	0.623648	-0.681197	0.405714	0.637364
1408	AT1G14160	3	0	0	0	0	0	AT1G14160	1.67733	2.63864	0.716013	0.271357	-1.88173	0.438633	0.662565
1409	AT1G14170	63	114	54	309	269	212	AT1G14170	147.25	107.549	186.952	1.73829	0.797671	0.00986527	0.0285496
1410	AT1G14180	16	10	18	28	25	27	AT1G14180	20.6467	21.4542	19.8392	0.924726	-0.112903	0.854887	0.937107
1411	AT1G14185	0	0	0	0	0	0	AT1G14185	1.04405	1.37209	0.716013	0.52184	-0.938321	0.86677	0.937107
1412	AT1G14190	0	0	1	0	1	0	AT1G14190	1.39233	1.8506	0.934051	0.504728	-0.986421	0.799552	0.937107
1413	AT1G14200	321	293	315	525	584	434	AT1G14200	395.283	425.744	364.822	0.856906	-0.222791	0.0854499	0.188835
1414	AT1G14205	35	17	14	26	32	20	AT1G14205	24.9379	30.8614	19.0143	0.61612	-0.698717	0.150388	0.302131
1415	AT1G14210	325	260	288	360	343	263	AT1G14210	313.72	398.956	228.483	0.572702	-0.804143	1.17398e-08	7.65565e-08
1416	AT1G14220	0	0	0	0	0	0	AT1G14220	1.04405	1.37209	0.716013	0.52184	-0.938321	0.86677	0.937107
1417	AT1G14225	0	0	0	0	0	0	AT1G14225	1.04405	1.37209	0.716013	0.52184	-0.938321	0.86677	0.937107
1418	AT1G14230	90	68	101	414	520	353	AT1G14230	211.739	119.753	303.724	2.53625	1.3427	2.30957e-14	2.42416e-13
1419	AT1G14240	0	4	0	0	0	0	AT1G14240	1.98686	3.25771	0.716013	0.21979	-2.1858	0.341857	0.558285
1420	AT1G14250	2	2	1	3	1	2	AT1G14250	2.89735	3.63777	2.15694	0.592928	-0.754071	0.687682	0.878823
1421	AT1G14260	14	10	3	28	23	30	AT1G14260	16.8242	13.4322	20.2163	1.50506	0.589822	0.406443	0.638362
1422	AT1G14270	129	73	74	229	284	193	AT1G14270	146.287	125.656	166.918	1.32837	0.409662	0.0873596	0.192253
1423	AT1G14280	0	0	0	2	2	0	AT1G14280	1.48903	1.37209	1.60596	1.17044	0.227056	1	1
1424	AT1G14290	26	38	14	54	40	38	AT1G14290	34.4764	36.9613	31.9915	0.865542	-0.208324	0.666806	0.874609
1425	AT1G14300	40	33	44	264	297	250	AT1G14300	124.007	54.87	193.144	3.52003	1.81559	1.71229e-14	1.819e-13
1426	AT1G14310	12	11	13	25	17	23	AT1G14310	17.0871	17.8443	16.33	0.915135	-0.127944	0.853504	0.937107
1427	AT1G14315	0	1	2	0	0	0	AT1G14315	1.75826	2.80051	0.716013	0.255672	-1.96763	0.438238	0.662565
1428	AT1G14320	6701	6051	6218	16467	17318	13547	AT1G14320	9921.83	8658.24	11185.4	1.29188	0.369474	1.23117e-25	2.50337e-24
1429	AT1G14330	576	505	482	643	700	514	AT1G14330	575.912	713.248	438.576	0.6149	-0.701576	2.73119e-11	2.24418e-10
1430	AT1G14340	47	60	57	135	150	99	AT1G14340	83.8324	76.7738	90.8909	1.18388	0.243522	0.336922	0.558285
1431	AT1G14345	11	22	27	21	31	27	AT1G14345	24.4328	29.3067	19.5589	0.667387	-0.583404	0.281445	0.487086
1432	AT1G14350	14	30	15	6	15	17	AT1G14350	19.2791	28.6024	9.95588	0.348079	-1.52252	0.02406	0.0631525
1433	AT1G14360	237	174	222	465	486	457	AT1G14360	312.877	289.682	336.073	1.16014	0.214302	0.148857	0.299609
1434	AT1G14370	192	195	202	397	482	310	AT1G14370	275.47	271.013	279.926	1.03289	0.0466814	0.689718	0.878823
1435	AT1G14380	97	82	104	274	270	217	AT1G14380	155.663	130.744	180.582	1.38119	0.465915	0.0188458	0.0508707
1436	AT1G14390	17	7	7	19	21	12	AT1G14390	14.0288	15.1986	12.8591	0.846071	-0.24115	0.725286	0.903403
1437	AT1G14400	644	591	601	1883	2093	1685	AT1G14400	1090.27	839.44	1341.09	1.5976	0.675908	1.35361e-17	1.75865e-16
1438	AT1G14410	86	92	135	406	483	359	AT1G14410	220.557	145.647	295.467	2.02865	1.02052	1.371e-07	8.0595e-07
1439	AT1G14420	1	12	3	0	0	0	AT1G14420	4.80133	8.88665	0.716013	0.0805718	-3.63358	0.0638656	0.147536
1440	AT1G14430	49	65	60	50	38	29	AT1G14430	54.8095	81.4107	28.2084	0.346495	-1.5291	9.65418e-06	4.57263e-05
1441	AT1G14440	45	47	28	92	62	48	AT1G14440	52.0234	55.9245	48.1223	0.860488	-0.216774	0.547637	0.768536
1442	AT1G14450	756	715	626	1324	1472	1152	AT1G14450	945.755	957.141	934.368	0.976207	-0.0347407	0.678199	0.878823
1443	AT1G14455	31	11	43	6	4	8	AT1G14455	22.6695	40.221	5.1181	0.127249	-2.97427	0.00262515	0.00857073
1444	AT1G14460	16	8	22	20	26	26	AT1G14460	20.1981	22.4254	17.9707	0.801357	-0.319483	0.579086	0.792518
1445	AT1G14470	5	5	2	15	23	19	AT1G14470	10.5409	6.79704	14.2847	2.1016	1.07149	0.206204	0.387563
1446	AT1G14480	14	3	8	42	28	25	AT1G14480	17.8266	12.5249	23.1284	1.84659	0.884863	0.168347	0.328695
1447	AT1G14490	66	57	46	82	109	68	AT1G14490	69.8195	78.1175	61.5215	0.787552	-0.344553	0.250817	0.451335
1448	AT1G14500	4	2	0	2	2	5	AT1G14500	3.48239	4.00363	2.96116	0.739619	-0.435145	0.774264	0.937107
1449	AT1G14510	691	604	476	1460	1437	1179	AT1G14510	885.258	805.597	964.918	1.19777	0.260348	0.019188	0.0516628
1450	AT1G14520	575	411	291	813	866	714	AT1G14520	572.338	577.119	567.558	0.983432	-0.0241024	0.846474	0.937107
1451	AT1G14530	47	44	32	328	399	301	AT1G14530	150.5	57.2687	243.731	4.25592	2.08947	1.62783e-21	2.64241e-20
1452	AT1G14540	674	516	556	1553	1677	1184	AT1G14540	917.462	795.217	1039.71	1.30745	0.386756	1.36104e-05	6.32531e-05
1453	AT1G14549	0	0	0	0	0	0	AT1G14549	1.04405	1.37209	0.716013	0.52184	-0.938321	0.86677	0.937107
1454	AT1G14550	21	7	25	10	7	10	AT1G14550	16.3612	25.5004	7.22203	0.283212	-1.82004	0.014736	0.0409379
1455	AT1G14560	180	128	161	606	541	458	AT1G14560	297.539	214.744	380.334	1.7711	0.824646	2.20916e-08	1.41019e-07
1456	AT1G14570	165	250	195	989	956	742	AT1G14570	458.451	282.192	634.711	2.24922	1.16942	5.33716e-14	5.44034e-13
1457	AT1G14580	176	184	184	330	424	265	AT1G14580	245.169	250.46	239.878	0.957752	-0.0622767	0.77988	0.937107
1458	AT1G14590	38	46	26	167	161	140	AT1G14590	81.6023	51.5408	111.664	2.16652	1.11538	7.84369e-05	0.000330231
1459	AT1G14600	33	50	16	65	64	43	AT1G14600	43.8032	46.5304	41.0759	0.882776	-0.179881	0.744553	0.916979
1460	AT1G14610	303	232	186	1009	1122	956	AT1G14610	530.554	327.661	733.446	2.23843	1.16249	4.86437e-20	7.27943e-19
1461	AT1G14620	60	45	50	204	176	159	AT1G14620	100.161	71.8415	128.481	1.78839	0.838663	0.00096331	0.00340937
1462	AT1G14630	10	2	0	0	2	0	AT1G14630	3.8444	6.53671	1.15209	0.176249	-2.50431	0.153158	0.3067
1463	AT1G14640	37	35	48	63	92	41	AT1G14640	51.3227	56.4603	46.185	0.818009	-0.289811	0.470201	0.699097
1464	AT1G14642	4	3	0	6	7	8	AT1G14642	5.12362	4.47503	5.77221	1.28987	0.367226	0.858104	0.937107
1465	AT1G14650	334	335	276	1490	1526	1275	AT1G14650	724.76	432.369	1017.15	2.35251	1.2342	1.04264e-36	3.28693e-35
1466	AT1G14660	10	19	7	58	48	73	AT1G14660	31.0151	17.9001	44.13	2.46534	1.30179	0.0116573	0.0331609
1467	AT1G14670	1077	1037	998	2945	2921	2380	AT1G14670	1686.73	1422.46	1951	1.37157	0.45583	1.98846e-12	1.78601e-11
1468	AT1G14680	0	5	4	14	3	7	AT1G14680	6.04382	5.64315	6.4445	1.142	0.191568	0.894108	0.95704
1469	AT1G14685	308	311	338	924	928	749	AT1G14685	527.749	439.746	615.752	1.40024	0.485679	7.70217e-06	3.68944e-05
1470	AT1G14686	0	0	0	0	0	0	AT1G14686	1.04405	1.37209	0.716013	0.52184	-0.938321	0.86677	0.937107
1471	AT1G14687	40	48	40	34	24	12	AT1G14687	38.4721	60.0271	16.9172	0.281826	-1.82712	1.28311e-05	5.98462e-05
1472	AT1G14688	4	0	0	0	0	0	AT1G14688	1.88842	3.06082	0.716013	0.233929	-2.09586	0.343495	0.558285
1473	AT1G14690	105	100	114	361	353	279	AT1G14690	191.309	147.391	235.227	1.59593	0.674402	0.000171543	0.000685516
1474	AT1G14700	1	0	0	4	2	2	AT1G14700	2.19809	1.79427	2.60191	1.45012	0.53617	0.895614	0.957635
1475	AT1G14710	393	280	302	1123	1062	921	AT1G14710	590.27	443.792	736.748	1.66012	0.731289	7.35962e-12	6.32425e-11
1476	AT1G14720	79	49	46	54	110	59	AT1G14720	66.3903	79.8346	52.946	0.663197	-0.592491	0.0821532	0.182558
1477	AT1G14730	0	1	2	1	2	0	AT1G14730	2.08977	2.80051	1.37902	0.492418	-1.02204	0.697589	0.878823
1478	AT1G14740	640	444	498	2465	2519	1965	AT1G14740	1180.56	719.168	1641.94	2.28311	1.191	2.6631e-52	1.4014e-50
1479	AT1G14750	31	58	42	301	281	221	AT1G14750	126.045	61.8985	190.192	3.07264	1.61948	1.61771e-12	1.46753e-11
1480	AT1G14755	2	5	0	2	4	0	AT1G14755	3.30776	4.57348	2.04203	0.446495	-1.16328	0.49625	0.729073
1481	AT1G14760	24	19	25	51	103	54	AT1G14760	40.9038	32.4238	49.3838	1.52307	0.606983	0.118837	0.248526
1482	AT1G14770	75	50	59	105	102	91	AT1G14770	78.1433	84.8379	71.4487	0.84218	-0.2478	0.358316	0.577987
1483	AT1G14780	63	47	62	59	65	66	AT1G14780	62.9796	79.793	46.1663	0.578576	-0.789422	0.0103172	0.0297089
1484	AT1G14790	35	13	27	10	18	34	AT1G14790	25.6609	35.1964	16.1254	0.458155	-1.12609	0.051503	0.122044
1485	AT1G14800	2	7	7	17	13	14	AT1G14800	10.0344	8.86584	11.203	1.26361	0.337551	0.695211	0.878823
1486	AT1G14810	209	205	193	776	782	683	AT1G14810	405.521	278.598	532.444	1.91115	0.934445	1.75566e-13	1.72872e-12
1487	AT1G14820	95	65	40	104	132	90	AT1G14820	84.3764	91.2609	77.4919	0.849124	-0.235952	0.455011	0.682002
1488	AT1G14830	280	192	148	1050	917	813	AT1G14830	470.103	280.912	659.294	2.34698	1.23081	4.00155e-12	3.51181e-11
1489	AT1G14840	36	32	14	57	89	63	AT1G14840	44.2434	38.3547	50.1322	1.30707	0.386336	0.338729	0.558285
1490	AT1G14850	423	370	415	1219	1362	1001	AT1G14850	699.292	552.955	845.629	1.52929	0.612862	1.82972e-10	1.41138e-09
1491	AT1G14860	463	375	382	1436	1412	1168	AT1G14860	753.724	556.409	951.039	1.70925	0.77336	2.84924e-16	3.37615e-15
1492	AT1G14870	1138	1013	1001	1422	1575	1190	AT1G14870	1213.85	1438.33	989.365	0.687855	-0.539823	5.59049e-13	5.27557e-12
1493	AT1G14880	0	0	0	0	0	0	AT1G14880	1.04405	1.37209	0.716013	0.52184	-0.938321	0.86677	0.937107
1494	AT1G14890	58	25	16	45	40	22	AT1G14890	35.4562	45.2998	25.6125	0.565399	-0.822659	0.212564	0.395123
1495	AT1G14900	231	235	246	1392	1409	1157	AT1G14900	632.404	327.389	937.418	2.86332	1.51769	1.97477e-47	8.86563e-46
1496	AT1G14910	211	196	154	709	780	592	AT1G14910	374.338	256.538	492.138	1.91839	0.939892	1.12329e-12	1.0307e-11
1497	AT1G14920	1274	1142	1101	2309	2543	1834	AT1G14920	1590.34	1604.41	1576.27	0.982458	-0.0255325	0.743667	0.916979
1498	AT1G14930	3262	3184	2908	4376	4390	3602	AT1G14930	3599.12	4270.98	2927.26	0.685383	-0.545018	2.63894e-26	5.55689e-25
1499	AT1G14940	550	392	390	730	727	532	AT1G14940	537.033	604.98	469.085	0.775373	-0.367037	0.00851927	0.0250514
1500	AT1G14950	320	298	227	676	740	557	AT1G14950	426.006	385.57	466.442	1.20975	0.274704	0.0258212	0.0673142
1501	AT1G14960	106	73	110	261	259	216	AT1G14960	154.067	133.172	174.963	1.31381	0.393759	0.0511586	0.121344
1502	AT1G14970	16	22	24	57	63	29	AT1G14970	32.615	29.9821	35.2479	1.17563	0.233435	0.552064	0.768536
1503	AT1G14980	477	480	412	1066	1141	908	AT1G14980	681.843	626.172	737.514	1.17781	0.236113	0.0147534	0.0409661
1504	AT1G14990	70	36	51	99	88	88	AT1G14990	69.2603	72.2992	66.2215	0.915936	-0.126682	0.625477	0.83881
1505	AT1G15000	92	85	81	453	445	341	AT1G15000	206.005	119.041	292.969	2.46107	1.29929	3.4757e-13	3.34134e-12
1506	AT1G15010	581	555	539	930	1022	766	AT1G15010	704.211	766.204	642.217	0.83818	-0.254668	0.00907693	0.0265078
1507	AT1G15015	2	0	1	0	0	0	AT1G15015	1.70549	2.69496	0.716013	0.265686	-1.91221	0.438502	0.662565
1508	AT1G15020	88	76	75	540	566	459	AT1G15020	240.658	110.239	371.078	3.36613	1.75109	7.42098e-25	1.45248e-23
1509	AT1G15030	144	82	109	379	369	260	AT1G15030	195.315	152.979	237.651	1.55349	0.635513	0.00071888	0.0026041
1510	AT1G15040	13	26	8	51	31	36	AT1G15040	25.8757	22.945	28.8063	1.25545	0.328204	0.554455	0.768536
1511	AT1G15045	0	0	0	0	0	0	AT1G15045	1.04405	1.37209	0.716013	0.52184	-0.938321	0.86677	0.937107
1512	AT1G15050	0	0	0	7	3	0	AT1G15050	2.16538	1.37209	2.95867	2.15632	1.10857	0.644208	0.85783
1513	AT1G15060	81	87	98	256	269	225	AT1G15060	150.961	123.475	178.448	1.44522	0.531285	0.00800015	0.0236475
1514	AT1G15080	13	13	7	32	32	36	AT1G15080	20.5254	16.3383	24.7126	1.51256	0.596992	0.322091	0.542689
1515	AT1G15100	648	459	514	906	901	793	AT1G15100	677.49	737.273	617.706	0.837825	-0.255278	0.0223005	0.0590067
1516	AT1G15110	239	224	275	442	400	361	AT1G15110	312.77	339.458	286.082	0.842762	-0.246803	0.11163	0.236233
1517	AT1G15120	591	561	580	1178	1231	930	AT1G15120	790.696	792.874	788.517	0.994506	-0.00794805	0.996259	1
1518	AT1G15125	26	18	9	24	28	29	AT1G15125	22.6342	25.1407	20.1277	0.800603	-0.320841	0.506163	0.737622
1519	AT1G15130	347	414	388	1565	1656	1326	AT1G15130	802.515	528.691	1076.34	2.03586	1.02564	2.59965e-29	6.26448e-28
1520	AT1G15140	433	370	443	626	547	562	AT1G15140	492.472	570.575	414.369	0.72623	-0.461502	0.000797246	0.00286562
1521	AT1G15150	14	15	13	9	7	1	AT1G15150	12.565	20.5743	4.55573	0.221428	-2.17509	0.0043445	0.0135921
1522	AT1G15160	14	12	8	57	63	56	AT1G15160	29.6667	16.7675	42.5659	2.53859	1.34403	0.00541152	0.0166076
1523	AT1G15165	10	2	1	24	30	14	AT1G15165	11.7567	7.01522	16.4982	2.35176	1.23374	0.129107	0.266299
1524	AT1G15170	610	497	567	1099	1129	846	AT1G15170	745.043	764.504	725.582	0.949088	-0.0753856	0.44132	0.665576
1525	AT1G15180	1385	1289	1335	2801	3208	2396	AT1G15180	1908.89	1832.54	1985.24	1.08333	0.115467	0.0504894	0.120079
1526	AT1G15190	27	50	59	54	71	66	AT1G15190	55.4565	64.5732	46.3398	0.717633	-0.478681	0.308139	0.523919
1527	AT1G15200	381	347	257	563	546	471	AT1G15200	411.983	448.777	375.189	0.836026	-0.258381	0.0719235	0.163158
1528	AT1G15210	692	704	578	2132	2147	1517	AT1G15210	1132.9	901.968	1363.84	1.51207	0.596523	6.05267e-08	3.69213e-07
1529	AT1G15215	28	26	10	68	91	48	AT1G15215	39.6169	30.2348	48.999	1.62062	0.696543	0.0865323	0.190855
1530	AT1G15220	9	29	22	188	173	117	AT1G15220	71.0908	29.3696	112.812	3.84111	1.94152	3.55463e-10	2.67221e-09
1531	AT1G15230	488	337	298	1215	1080	917	AT1G15230	634.661	508.855	760.467	1.49447	0.57963	0.000490278	0.00182644
1532	AT1G15240	107	95	74	503	482	444	AT1G15240	233.519	126.738	340.3	2.68506	1.42495	6.60148e-17	8.18968e-16
1533	AT1G15250	81	85	98	183	246	171	AT1G15250	132.381	122.532	142.23	1.16076	0.215072	0.294117	0.504365
1534	AT1G15260	7	18	20	35	46	37	AT1G15260	25.5499	22.3828	28.717	1.28299	0.359513	0.448713	0.674606
1535	AT1G15270	793	750	739	480	609	435	AT1G15270	701.832	1043.33	360.332	0.345367	-1.5338	2.61428e-55	1.49107e-53
1536	AT1G15280	260	281	257	1181	1191	925	AT1G15280	572.851	366.58	779.122	2.12538	1.08772	4.1201e-24	7.74112e-23
1537	AT1G15290	91	49	76	290	322	247	AT1G15290	151.469	99.256	203.682	2.05209	1.03709	6.07862e-07	3.33014e-06
1538	AT1G15310	51	80	49	116	172	117	AT1G15310	90.1586	84.0626	96.2547	1.14504	0.195393	0.504247	0.736274
1539	AT1G15320	6	0	3	0	2	2	AT1G15320	3.51744	5.3407	1.69417	0.317218	-1.65645	0.25443	0.456687
1540	AT1G15330	300	314	248	2244	2206	1634	AT1G15330	914.273	394.717	1433.83	3.63255	1.86098	1.04808e-63	7.42551e-62
1541	AT1G15340	1170	871	786	1895	1788	1575	AT1G15340	1264.76	1282.02	1247.5	0.973069	-0.0393863	0.68896	0.878823
1542	AT1G15350	242	185	263	634	674	631	AT1G15350	389.587	316.597	462.577	1.46109	0.547044	0.00113603	0.00396598
1543	AT1G15360	0	0	0	0	0	0	AT1G15360	1.04405	1.37209	0.716013	0.52184	-0.938321	0.86677	0.937107
1544	AT1G15370	258	315	251	520	484	480	AT1G15370	366.622	378.893	354.352	0.93523	-0.0966066	0.581584	0.794944
1545	AT1G15380	3	5	2	2	5	6	AT1G15380	4.91949	5.95267	3.88631	0.652869	-0.615136	0.634572	0.84807
1546	AT1G15385	0	2	0	0	2	0	AT1G15385	1.7335	2.3149	1.15209	0.497683	-1.0067	0.743786	0.916979
1547	AT1G15390	143	190	113	420	476	403	AT1G15390	257.213	205.382	309.044	1.50473	0.589501	0.0046282	0.0143985
1548	AT1G15400	327	299	248	572	577	478	AT1G15400	392.467	399.045	385.888	0.967028	-0.0483702	0.680972	0.878823
1549	AT1G15410	273	223	303	971	1017	836	AT1G15410	518.071	366.739	669.404	1.82529	0.868125	9.35322e-15	1.00858e-13
1550	AT1G15415	36	24	28	94	100	76	AT1G15415	52.8666	41.2825	64.4507	1.56121	0.642665	0.0676303	0.154839
1551	AT1G15420	104	71	94	194	274	202	AT1G15420	141.481	123.728	159.234	1.28696	0.363971	0.0876133	0.192572
1552	AT1G15430	320	278	278	790	742	653	AT1G15430	459.657	400.546	518.768	1.29515	0.373123	0.00169339	0.005728
1553	AT1G15440	165	135	135	622	668	503	AT1G15440	311.561	199.27	423.852	2.12702	1.08884	6.02203e-14	6.11326e-13
1554	AT1G15460	17	18	15	2	4	0	AT1G15460	13.1271	24.2121	2.04203	0.0843395	-3.56765	9.79199e-06	4.63548e-05
1555	AT1G15470	78	73	69	175	192	136	AT1G15470	110.443	101.732	119.154	1.17126	0.228062	0.330185	0.55175
1556	AT1G15480	26	43	18	220	197	164	AT1G15480	89.6391	41.2323	138.046	3.348	1.7433	2.75986e-10	2.09792e-09
1557	AT1G15490	70	61	71	288	265	217	AT1G15490	138.162	93.6545	182.669	1.95046	0.963812	6.9455e-06	3.34264e-05
1558	AT1G15500	14497	12769	12876	21858	22546	18355	AT1G15500	16577.1	18302.4	14851.9	0.811474	-0.301384	2.77235e-21	4.42633e-20
1559	AT1G15510	31	19	28	129	124	145	AT1G15510	66.5714	36.8146	96.3282	2.61657	1.38768	1.5267e-05	7.05187e-05
1560	AT1G15520	15	5	0	2	10	13	AT1G15520	8.46781	10.0618	6.87379	0.683154	-0.549717	0.58538	0.798528
1561	AT1G15530	340	277	177	292	294	223	AT1G15530	275.857	360.189	191.526	0.531738	-0.911211	0.00197386	0.00659879
1562	AT1G15540	0	2	0	0	0	0	AT1G15540	1.51546	2.3149	0.716013	0.309306	-1.69289	0.55626	0.768536
1563	AT1G15550	27	12	8	6	4	0	AT1G15550	12.6028	22.2559	2.94977	0.132539	-2.91551	0.00174076	0.00587437
1564	AT1G15570	2	5	8	8	24	18	AT1G15570	10.5223	8.40154	12.6431	1.50486	0.589628	0.468438	0.697095
1565	AT1G15580	0	0	0	2	0	0	AT1G15580	1.27099	1.37209	1.16988	0.852627	-0.230014	1	1
1566	AT1G15590	2	0	1	0	0	0	AT1G15590	1.70549	2.69496	0.716013	0.265686	-1.91221	0.438502	0.662565
1567	AT1G15600	0	0	0	0	0	0	AT1G15600	1.04405	1.37209	0.716013	0.52184	-0.938321	0.86677	0.937107
1568	AT1G15610	0	0	0	0	0	0	AT1G15610	1.04405	1.37209	0.716013	0.52184	-0.938321	0.86677	0.937107
1569	AT1G15620	0	2	0	0	0	0	AT1G15620	1.51546	2.3149	0.716013	0.309306	-1.69289	0.55626	0.768536
1570	AT1G15630	8	1	0	0	0	0	AT1G15630	2.96848	5.22095	0.716013	0.137142	-2.86625	0.135705	0.276844
1571	AT1G15640	1	5	0	0	0	0	AT1G15640	2.43366	4.1513	0.716013	0.172479	-2.5355	0.203069	0.384279
1572	AT1G15660	67	46	53	85	113	109	AT1G15660	75.4454	76.7037	74.1872	0.967191	-0.0481276	0.824296	0.937107
1573	AT1G15670	1968	1780	1779	3267	3480	2607	AT1G15670	2365.04	2522.59	2207.49	0.875087	-0.192501	0.00081461	0.00292301
1574	AT1G15680	2	0	0	0	0	0	AT1G15680	1.46623	2.21646	0.716013	0.323044	-1.6302	0.555354	0.768536
1575	AT1G15690	25286	22606	23174	32572	34315	26506	AT1G15690	27240.4	32422.2	22058.6	0.680356	-0.555638	1.40402e-77	1.33093e-75
1576	AT1G15700	30	16	31	100	59	57	AT1G15700	44.0684	36.4137	51.723	1.42043	0.506324	0.197006	0.375438
1577	AT1G15710	256	197	173	323	370	262	AT1G15710	255.401	285.099	225.703	0.791664	-0.33704	0.027185	0.0703327
1578	AT1G15720	17	15	23	77	61	47	AT1G15720	35.4276	26.6259	44.2292	1.66113	0.732168	0.0809271	0.18029
1579	AT1G15730	50	30	26	195	219	171	AT1G15730	94.0655	49.0645	139.067	2.83436	1.50302	2.74652e-08	1.73852e-07
1580	AT1G15740	121	97	71	665	768	587	AT1G15740	305.169	132.156	478.181	3.6183	1.85531	8.04339e-34	2.27946e-32
1581	AT1G15750	429	353	388	2060	2092	1847	AT1G15750	979.752	534.555	1424.95	2.66567	1.4145	4.67568e-61	3.1026e-59
1582	AT1G15757	0	0	0	0	1	0	AT1G15757	1.15307	1.37209	0.934051	0.680749	-0.554806	0.967425	1
1583	AT1G15760	0	0	2	6	4	6	AT1G15760	3.45256	2.32911	4.57602	1.96471	0.974314	0.570499	0.783454
1584	AT1G15770	2	0	0	0	0	0	AT1G15770	1.46623	2.21646	0.716013	0.323044	-1.6302	0.555354	0.768536
1585	AT1G15772	0	1	0	0	0	0	AT1G15772	1.27976	1.8435	0.716013	0.388399	-1.36439	0.69833	0.878823
1586	AT1G15780	183	202	187	712	741	514	AT1G15780	363.255	263.336	463.174	1.75887	0.814652	5.05359e-10	3.73507e-09
1587	AT1G15790	3	7	3	3	6	5	AT1G15790	5.71712	7.37399	4.06025	0.550617	-0.860878	0.46554	0.693364
1588	AT1G15800	59	78	88	133	160	110	AT1G15800	100.379	105.159	95.5989	0.909089	-0.137507	0.663001	0.870582
1589	AT1G15810	221	103	136	420	455	389	AT1G15810	254.488	208.306	300.671	1.44341	0.529481	0.0377749	0.0935894
1590	AT1G15820	1026	650	863	188	218	163	AT1G15820	644.493	1153.9	135.092	0.117074	-3.0945	4.75951e-25	9.41725e-24
1591	AT1G15825	32	6	27	28	33	19	AT1G15825	25.0226	30.63	19.4152	0.633862	-0.657759	0.313151	0.530716
1592	AT1G15830	43	59	49	30	42	34	AT1G15830	48.3413	70.7856	25.897	0.365851	-1.45067	6.82714e-05	0.000290218
1593	AT1G15840	185	185	182	286	345	237	AT1G15840	229.426	253.774	205.079	0.808117	-0.307363	0.0704578	0.160287
1594	AT1G15850	0	1	0	0	0	0	AT1G15850	1.27976	1.8435	0.716013	0.388399	-1.36439	0.69833	0.878823
1595	AT1G15860	214	185	137	294	389	291	AT1G15860	237.804	244.484	231.124	0.945355	-0.0810723	0.622967	0.836341
1596	AT1G15870	17	17	17	29	39	18	AT1G15870	22.6885	24.6977	20.6793	0.837298	-0.256186	0.684105	0.878823
1597	AT1G15880	49	74	54	417	490	419	AT1G15880	199.267	82.7823	315.752	3.81425	1.9314	8.49295e-25	1.65515e-23
1598	AT1G15885	9	0	0	38	31	24	AT1G15885	13.8877	5.17172	22.6037	4.37063	2.12784	0.00574541	0.0175117
1599	AT1G15890	1	2	0	16	17	31	AT1G15890	9.59647	2.73708	16.4559	6.01219	2.58789	0.00684507	0.0205118
1600	AT1G15900	18	3	16	10	15	10	AT1G15900	13.504	18.0417	8.96633	0.496979	-1.00874	0.164758	0.323733
1601	AT1G15910	89	85	47	71	97	58	AT1G15910	77.6019	101.505	53.6984	0.52902	-0.918606	0.00710253	0.0212109
1602	AT1G15920	235	216	207	789	893	683	AT1G15920	430.528	301.459	559.596	1.85629	0.892423	3.71709e-13	3.56584e-12
1603	AT1G15930	2796	2559	2713	7043	7172	5813	AT1G15930	4212.32	3686.31	4738.34	1.28539	0.362207	1.32354e-15	1.50662e-14
1604	AT1G15940	156	114	108	166	150	152	AT1G15940	142.471	172.651	112.291	0.650392	-0.620619	0.00197849	0.00661345
1605	AT1G15950	1826	1714	1617	4519	4594	3869	AT1G15950	2715.28	2354.01	3076.56	1.30694	0.386196	6.84106e-13	6.40902e-12
1606	AT1G15960	531	420	399	1186	1144	950	AT1G15960	695.625	614.465	776.784	1.26416	0.338184	0.000619423	0.0022681
1607	AT1G15970	34	19	46	112	134	108	AT1G15970	65.6582	46.6943	84.6222	1.81226	0.857789	0.00578311	0.0176128
1608	AT1G15980	5	4	5	23	13	12	AT1G15980	9.89182	7.76116	12.0225	1.54906	0.631393	0.472117	0.701345
1609	AT1G15990	4	2	1	3	0	0	AT1G15990	2.93948	4.48213	1.39682	0.311641	-1.68204	0.320875	0.541263
1610	AT1G16000	184	147	177	177	259	182	AT1G16000	189.865	233.046	146.685	0.629424	-0.667895	0.000212948	0.000838901
1611	AT1G16010	894	614	709	1408	1588	1199	AT1G16010	999.484	1007.51	991.462	0.984075	-0.0231598	0.806852	0.937107
1612	AT1G16020	40	27	32	190	177	138	AT1G16020	83.0647	46.2995	119.83	2.58815	1.37192	1.28657e-06	6.77685e-06
1613	AT1G16022	0	0	1	4	5	0	AT1G16022	2.28227	1.8506	2.71394	1.46652	0.552396	0.837776	0.937107
1614	AT1G16025	0	0	1	2	3	0	AT1G16025	1.8373	1.8506	1.824	0.985624	-0.0208909	1	1
1615	AT1G16030	224	182	215	433	524	419	AT1G16030	305.706	284.615	326.797	1.1482	0.199379	0.168185	0.328522
1616	AT1G16040	75	52	43	147	189	136	AT1G16040	95.1353	78.1245	112.146	1.43548	0.521531	0.0487594	0.116733
1617	AT1G16060	10	5	9	18	45	27	AT1G16060	17.0941	12.2575	21.9306	1.78916	0.839283	0.18899	0.362493
1618	AT1G16070	4	0	0	0	0	1	AT1G16070	2.02394	3.06082	0.987053	0.32248	-1.63272	0.423973	0.65624
1619	AT1G16080	106	68	89	309	270	205	AT1G16080	153.019	120.766	185.272	1.53414	0.617434	0.00240604	0.00791999
1620	AT1G16090	4	6	8	41	19	13	AT1G16090	13.7019	9.71731	17.6866	1.82011	0.864028	0.207903	0.389703
1621	AT1G16110	22	24	32	55	77	40	AT1G16110	39.057	37.286	40.828	1.09499	0.130922	0.707835	0.887313
1622	AT1G16120	11	7	8	19	11	7	AT1G16120	11.2337	13.144	9.32348	0.709334	-0.495462	0.543116	0.768536
1623	AT1G16130	84	48	65	228	220	233	AT1G16130	127.072	90.5657	163.578	1.80618	0.852941	0.000205568	0.000811711
1624	AT1G16150	0	3	3	9	8	13	AT1G16150	6.12404	4.22183	8.02625	1.90113	0.926859	0.419382	0.651946
1625	AT1G16160	3	2	1	8	4	2	AT1G16160	4.00284	4.05995	3.94573	0.971865	-0.0411728	1	1
1626	AT1G16170	597	530	616	907	1054	745	AT1G16170	718.151	798.019	638.283	0.799834	-0.322228	0.00371489	0.0117808
1627	AT1G16180	5110	4833	5012	5266	5603	4441	AT1G16180	5228.2	6835.3	3621.11	0.529767	-0.916571	7.94871e-50	3.82748e-48
1628	AT1G16190	159	115	152	475	580	450	AT1G16190	276.192	195.444	356.94	1.82631	0.86893	1.28932e-08	8.39166e-08
1629	AT1G16210	757	718	690	788	795	687	AT1G16210	764.344	989.602	539.086	0.54475	-0.876334	2.02572e-21	3.26299e-20
1630	AT1G16220	4	7	0	19	18	3	AT1G16220	8.06311	6.36065	9.76558	1.53531	0.618532	0.514352	0.746677
1631	AT1G16225	0	0	0	0	0	0	AT1G16225	1.04405	1.37209	0.716013	0.52184	-0.938321	0.86677	0.937107
1632	AT1G16230	0	0	0	0	0	0	AT1G16230	1.04405	1.37209	0.716013	0.52184	-0.938321	0.86677	0.937107
1633	AT1G16240	221	184	195	516	535	481	AT1G16240	319.778	274.722	364.835	1.32802	0.409274	0.00411961	0.012945
1634	AT1G16250	193	190	182	359	392	267	AT1G16250	249.766	259.508	240.024	0.924919	-0.1126	0.52216	0.755511
1635	AT1G16260	6	72	94	27	31	23	AT1G16260	51.3312	82.826	19.8364	0.239494	-2.06194	0.103595	0.222148
1636	AT1G16270	201	150	184	903	971	759	AT1G16270	434.03	244.987	623.073	2.54329	1.3467	4.43285e-27	9.7731e-26
1637	AT1G16280	37	61	25	148	143	119	AT1G16280	77.7234	57.7112	97.7356	1.69353	0.760034	0.0132022	0.0371438
1638	AT1G16290	9	0	2	2	0	2	AT1G16290	3.92035	6.12874	1.71196	0.279334	-1.83994	0.199441	0.379227
1639	AT1G16300	151	100	86	347	436	318	AT1G16300	207.066	153.414	260.718	1.69944	0.765063	4.67382e-05	0.000203157
1640	AT1G16310	13	5	49	65	53	37	AT1G16310	34.8578	32.6643	37.0513	1.1343	0.181807	0.815865	0.937107
1641	AT1G16320	77	64	51	131	116	104	AT1G16320	86.1895	88.4538	83.9251	0.948801	-0.0758226	0.756446	0.926828
1642	AT1G16330	7	0	0	6	0	0	AT1G16330	3.20249	4.32736	2.07762	0.480113	-1.05855	0.540124	0.768536
1643	AT1G16340	27	18	22	91	94	81	AT1G16340	47.8002	31.7834	63.8169	2.00787	1.00566	0.00695093	0.0207993
1644	AT1G16350	196	220	194	952	941	792	AT1G16350	458.627	280.659	636.596	2.26822	1.18156	8.10508e-23	1.41988e-21
1645	AT1G16360	19	21	11	9	2	5	AT1G16360	14.5532	24.5566	4.54971	0.185274	-2.43227	0.00045181	0.00169124
1646	AT1G16370	14	15	31	8	6	5	AT1G16370	17.1912	29.1874	5.19492	0.177985	-2.49017	0.00255238	0.00835319
1647	AT1G16380	2	3	4	0	0	0	AT1G16380	3.13036	5.5447	0.716013	0.129135	-2.95305	0.087939	0.193092
1648	AT1G16390	142	120	107	38	16	12	AT1G16390	92.5857	169.091	16.0806	0.0951006	-3.3944	1.47637e-31	3.86585e-30
1649	AT1G16400	19	7	17	8	5	6	AT1G16400	13.038	20.828	5.24792	0.251965	-1.98871	0.00552686	0.0169329
1650	AT1G16410	5	2	1	2	0	0	AT1G16410	3.0371	4.90432	1.16988	0.238542	-2.06769	0.210267	0.392058
1651	AT1G16420	0	1	0	0	0	0	AT1G16420	1.27976	1.8435	0.716013	0.388399	-1.36439	0.69833	0.878823
1652	AT1G16430	22	32	12	56	37	38	AT1G16430	31.6392	31.4871	31.7913	1.00966	0.0138706	1	1
1653	AT1G16440	0	0	0	0	2	0	AT1G16440	1.26209	1.37209	1.15209	0.839658	-0.252127	1	1
1654	AT1G16445	25	10	10	17	12	11	AT1G16445	15.7988	21.4257	10.1718	0.474747	-1.07477	0.0818104	0.181975
1655	AT1G16460	68	100	56	248	257	207	AT1G16460	136.577	104.017	169.137	1.62605	0.701368	0.00129628	0.00447944
1656	AT1G16470	361	276	370	1019	992	801	AT1G16470	563.147	460.935	665.36	1.4435	0.529571	5.89164e-06	2.86024e-05
1657	AT1G16480	2	13	14	44	58	41	AT1G16480	24.7519	15.0438	34.46	2.29064	1.19575	0.0172656	0.0472111
1658	AT1G16490	20	6	5	15	10	22	AT1G16490	13.65	15.0367	12.2633	0.815559	-0.294139	0.636304	0.84988
1659	AT1G16500	301	236	214	245	305	268	AT1G16500	268.778	342.101	195.455	0.571339	-0.807582	5.54815e-08	3.39885e-07
1660	AT1G16510	10	12	2	16	15	4	AT1G16510	10.4547	12.2078	8.7017	0.7128	-0.488431	0.58005	0.793506
1661	AT1G16515	2	0	4	5	1	5	AT1G16515	3.77721	4.13049	3.42393	0.828941	-0.270659	0.898954	0.959709
1662	AT1G16520	72	68	56	130	200	142	AT1G16520	101.467	90.6211	112.313	1.23937	0.309604	0.217803	0.402852
1663	AT1G16530	0	0	0	0	0	0	AT1G16530	1.04405	1.37209	0.716013	0.52184	-0.938321	0.86677	0.937107
1664	AT1G16540	39	39	25	154	126	110	AT1G16540	70.5679	48.1846	92.9512	1.92906	0.947901	0.00177931	0.00599332
1665	AT1G16560	205	181	190	783	745	562	AT1G16560	378.664	264.16	493.169	1.86693	0.90067	4.56827e-12	3.98603e-11
1666	AT1G16570	18	29	54	216	225	217	AT1G16570	103.045	48.4815	157.608	3.25089	1.70084	4.43833e-09	3.01948e-08
1667	AT1G16590	43	22	11	65	84	96	AT1G16590	47.4811	35.1604	59.8018	1.70083	0.76624	0.15607	0.310476
1668	AT1G16610	543	453	567	1428	1574	1260	AT1G16610	862.479	715.477	1009.48	1.41092	0.496638	2.8427e-07	1.61796e-06
1669	AT1G16630	17	6	4	18	3	0	AT1G16630	9.37329	13.2916	5.45496	0.410405	-1.28488	0.225445	0.414283
1670	AT1G16640	16	23	24	15	35	22	AT1G16640	24.0839	30.4535	17.7142	0.581682	-0.781697	0.141664	0.287127
1671	AT1G16650	33	29	36	106	100	86	AT1G16650	58.0427	46.2011	69.8844	1.51261	0.597043	0.0700161	0.159482
1672	AT1G16670	343	386	388	1071	1230	900	AT1G16670	634.845	513.803	755.886	1.47116	0.556953	3.31187e-07	1.8709e-06
1673	AT1G16680	78	39	68	296	276	203	AT1G16680	134.157	85.2255	183.088	2.14828	1.10318	5.5607e-07	3.06244e-06
1674	AT1G16690	29	22	25	124	100	75	AT1G16690	53.4683	35.9489	70.9878	1.97468	0.981621	0.00466404	0.0144984
1675	AT1G16700	207	156	140	651	682	499	AT1G16700	330.848	229.294	432.402	1.8858	0.915175	7.86819e-11	6.26461e-10
1676	AT1G16705	7	21	10	0	7	0	AT1G16705	10.6271	19.0119	2.24228	0.117941	-3.08387	0.00454095	0.0141449
1677	AT1G16710	103	79	111	599	631	491	AT1G16710	271.262	135.212	407.313	3.0124	1.59091	9.77942e-24	1.81116e-22
1678	AT1G16720	99	97	82	675	768	611	AT1G16720	307.544	128.132	486.956	3.80043	1.92616	1.33869e-36	4.20073e-35
1679	AT1G16730	438	583	461	2404	2468	2007	AT1G16730	1155.04	681.708	1628.36	2.38865	1.2562	5.21783e-33	1.44558e-31
1680	AT1G16740	542	459	477	444	418	382	AT1G16740	485.485	674.817	296.152	0.438863	-1.18816	2.64804e-25	5.31679e-24
1681	AT1G16750	61	44	54	103	152	83	AT1G16750	76.7174	73.7064	79.7284	1.0817	0.113305	0.683456	0.878823
1682	AT1G16760	2	1	1	0	0	0	AT1G16760	1.94119	3.16637	0.716013	0.226131	-2.14477	0.342617	0.558285
1683	AT1G16770	8	3	3	28	38	23	AT1G16770	14.5944	7.59928	21.5896	2.841	1.5064	0.0342968	0.0861305
1684	AT1G16780	72	60	58	108	132	122	AT1G16780	87.4399	87.8069	87.0729	0.991641	-0.0121097	0.940149	0.990342
1685	AT1G16790	125	148	146	218	178	184	AT1G16790	166.322	193.775	138.87	0.716657	-0.480646	0.0133436	0.037495
1686	AT1G16800	38	12	26	107	107	93	AT1G16800	54.5239	35.513	73.5349	2.07064	1.05008	0.00300307	0.00967913
1687	AT1G16810	478	414	396	278	322	328	AT1G16810	405.369	587.825	222.913	0.379217	-1.3989	2.53292e-29	6.10909e-28
1688	AT1G16820	26	38	34	22	18	6	AT1G16820	28.8955	46.5314	11.2595	0.241976	-2.04706	3.33048e-05	0.00014738
1689	AT1G16825	17	29	15	44	47	41	AT1G16825	30.7296	29.3975	32.0616	1.09062	0.125151	0.796514	0.937107
1690	AT1G16830	24	13	11	54	41	40	AT1G16830	27.824	22.8963	32.7517	1.43044	0.516455	0.322814	0.54372
1691	AT1G16840	526	407	433	1145	1054	948	AT1G16840	684.905	622.495	747.315	1.20052	0.263654	0.00862096	0.0253176
1692	AT1G16850	50	59	49	267	217	191	AT1G16850	117.066	73.7409	160.391	2.17506	1.12105	1.63003e-06	8.48738e-06
1693	AT1G16858	249	221	233	646	606	431	AT1G16858	359.217	322.168	396.265	1.23	0.298654	0.0206009	0.0549747
1694	AT1G16860	249	221	233	646	606	431	AT1G16860	359.217	322.168	396.265	1.23	0.298654	0.0206009	0.0549747
1695	AT1G16870	86	78	97	407	394	341	AT1G16870	196.137	120.864	271.41	2.24557	1.16708	1.34043e-10	1.04612e-09
1696	AT1G16880	56	62	55	121	120	91	AT1G16880	79.7818	80.5592	79.0044	0.980699	-0.0281179	0.965889	1
1697	AT1G16890	625	558	540	748	689	552	AT1G16890	628.489	786.673	470.306	0.597841	-0.742166	2.13661e-13	2.09397e-12
1698	AT1G16900	197	233	185	382	363	337	AT1G16900	270.398	282.903	257.893	0.911597	-0.133532	0.388563	0.615932
1699	AT1G16905	1	1	1	0	0	0	AT1G16905	1.7301	2.74419	0.716013	0.26092	-1.93832	0.438381	0.662565
1700	AT1G16910	0	6	0	0	0	0	AT1G16910	2.45827	4.20052	0.716013	0.170458	-2.55251	0.266361	0.46775
1701	AT1G16916	46	33	33	76	70	44	AT1G16916	48.6455	52.1395	45.1515	0.865974	-0.207604	0.577103	0.790607
1702	AT1G16920	162	131	150	452	447	412	AT1G16920	257.859	203.296	312.422	1.53679	0.619918	8.78659e-05	0.000367145
1703	AT1G16930	48	40	36	109	142	128	AT1G16930	74.4129	57.7192	91.1065	1.57844	0.658501	0.0273229	0.0706212
1704	AT1G16940	0	0	0	0	1	0	AT1G16940	1.15307	1.37209	0.934051	0.680749	-0.554806	0.967425	1
1705	AT1G16950	1	0	0	0	0	0	AT1G16950	1.25514	1.79427	0.716013	0.399054	-1.32534	0.696842	0.878823
1706	AT1G16960	2	3	3	0	5	0	AT1G16960	3.4362	5.06619	1.8062	0.356521	-1.48794	0.364849	0.586343
1707	AT1G16970	20	48	44	89	79	35	AT1G16970	50.561	53.4975	47.6246	0.890222	-0.167763	0.845005	0.937107
1708	AT1G16980	23	31	3	6	12	0	AT1G16980	15.9127	27.1313	4.69408	0.173013	-2.53105	0.0455812	0.11019
1709	AT1G17000	0	6	2	0	1	0	AT1G17000	3.04579	5.15754	0.934051	0.181104	-2.46511	0.161194	0.318108
1710	AT1G17010	537	552	491	1574	1480	1256	AT1G17010	872.14	723.246	1021.03	1.41174	0.497473	1.02363e-08	6.72354e-08
1711	AT1G17020	3344	3035	3324	9781	10214	8222	AT1G17020	5555.16	4434.42	6675.9	1.50547	0.590217	7.38964e-37	2.34315e-35
1712	AT1G17030	12	3	11	4	0	5	AT1G17030	8.04751	13.1161	2.97895	0.227123	-2.13846	0.0197299	0.052936
1713	AT1G17040	40	18	15	74	63	58	AT1G17040	40.4441	33.9222	46.9659	1.38452	0.469383	0.28586	0.493002
1714	AT1G17050	26	29	32	179	200	172	AT1G17050	86.4478	41.3318	131.564	3.18312	1.67044	2.50177e-09	1.73808e-08
1715	AT1G17060	102	170	119	333	396	296	AT1G17060	212.186	181.516	242.856	1.33793	0.420008	0.0724008	0.164049
1716	AT1G17070	98	130	69	242	295	216	AT1G17070	157.773	137.045	178.5	1.30249	0.381271	0.134884	0.275417
1717	AT1G17080	265	327	309	527	548	470	AT1G17080	391.221	415.258	367.184	0.884232	-0.177504	0.290226	0.499114
1718	AT1G17090	49	45	29	102	78	52	AT1G17090	56.0567	57.1489	54.9644	0.961776	-0.0562274	0.891348	0.955937
1719	AT1G17100	125	103	86	327	293	278	AT1G17100	179.005	143.851	214.158	1.48875	0.5741	0.00275002	0.00893978
1720	AT1G17110	101	81	101	500	525	407	AT1G17110	234.746	130.525	338.967	2.59694	1.37681	2.70516e-16	3.20962e-15
1721	AT1G17120	513	374	341	663	754	578	AT1G17120	514.832	557.427	472.236	0.84717	-0.239277	0.0868963	0.191565
1722	AT1G17130	143	130	121	231	218	161	AT1G17130	162.617	180.926	144.308	0.797606	-0.326251	0.0984348	0.212592
1723	AT1G17140	20	14	14	44	40	51	AT1G17140	28.1801	23.1145	33.2457	1.43831	0.524371	0.311293	0.528357
1724	AT1G17145	82	50	52	156	183	157	AT1G17145	101.508	84.4436	118.572	1.40416	0.489705	0.0599835	0.139587
1725	AT1G17147	191	173	128	95	112	78	AT1G17147	146.323	224.811	67.8362	0.301748	-1.72858	5.61826e-16	6.53207e-15
1726	AT1G17150	2	2	0	1	0	0	AT1G17150	2.05111	3.15926	0.942948	0.298471	-1.74434	0.424157	0.65624
1727	AT1G17160	90	88	83	544	572	403	AT1G17160	239.342	120.568	358.116	2.97023	1.57058	8.09476e-21	1.25413e-19
1728	AT1G17170	1072	899	900	1087	1101	934	AT1G17170	1024.5	1308.4	740.606	0.566039	-0.821026	1.34927e-24	2.60526e-23
1729	AT1G17180	248	139	133	253	251	192	AT1G17180	200.069	235.24	164.898	0.700978	-0.51256	0.0824093	0.183047
1730	AT1G17190	29	55	47	41	40	25	AT1G17190	43.7752	62.0325	25.5179	0.411363	-1.28152	0.00560946	0.0171589
1731	AT1G17200	437	405	449	403	490	361	AT1G17200	444.244	591.634	296.855	0.501754	-0.994947	1.29113e-16	1.57166e-15
1732	AT1G17210	587	643	481	2826	3082	2289	AT1G17210	1358.45	782.468	1934.44	2.47223	1.30581	1.52037e-46	6.62871e-45
1733	AT1G17220	297	224	197	775	720	637	AT1G17220	416.426	326.621	506.231	1.5499	0.632179	6.07308e-07	3.32778e-06
1734	AT1G17230	64	39	32	144	145	88	AT1G17230	75.4752	62.0887	88.8617	1.43121	0.51723	0.0802817	0.179087
1735	AT1G17235	1	0	2	0	2	1	AT1G17235	2.08721	2.75129	1.42313	0.517259	-0.951042	0.697391	0.878823
1736	AT1G17240	3	4	4	113	150	108	AT1G17240	47.388	6.43829	88.3377	13.7207	3.77828	7.71452e-17	9.53139e-16
1737	AT1G17250	15	19	26	86	82	81	AT1G17250	44.5842	29.1027	60.0658	2.06393	1.04539	0.00572394	0.01746
1738	AT1G17260	66	64	15	20	18	2	AT1G17260	38.1525	66.5836	9.72147	0.146004	-2.77592	0.00445413	0.0139015
1739	AT1G17270	8	8	9	120	76	64	AT1G17270	37.3465	12.8273	61.8657	4.82295	2.26992	1.00365e-06	5.36237e-06
1740	AT1G17280	177	125	101	257	287	248	AT1G17280	186.093	183.353	188.833	1.02989	0.0424882	0.929114	0.98186
1741	AT1G17285	1	5	0	1	2	2	AT1G17285	3.0362	4.1513	1.9211	0.462772	-1.11163	0.524599	0.758073
1742	AT1G17290	1248	1171	1167	3019	3368	2562	AT1G17290	1876.64	1638.69	2114.59	1.29042	0.367837	2.33179e-09	1.62705e-08
1743	AT1G17300	0	0	6	0	0	0	AT1G17300	2.47958	4.24314	0.716013	0.168746	-2.56707	0.273601	0.476451
1744	AT1G17310	2	0	0	0	0	0	AT1G17310	1.46623	2.21646	0.716013	0.323044	-1.6302	0.555354	0.768536
1745	AT1G17330	62	43	26	108	113	111	AT1G17330	70.1038	60.2589	79.9487	1.32675	0.4079	0.214628	0.398157
1746	AT1G17340	107	92	73	399	459	407	AT1G17340	213.251	124.846	301.656	2.41623	1.27276	7.51549e-13	7.00947e-12
1747	AT1G17345	13	45	39	28	27	28	AT1G17345	33.6409	46.7354	20.5463	0.439631	-1.18564	0.0961925	0.20846
1748	AT1G17350	32	39	31	52	72	39	AT1G17350	43.4432	48.1004	38.7859	0.806353	-0.310516	0.45593	0.683042
1749	AT1G17360	21	48	56	61	117	78	AT1G17360	60.4362	59.6617	61.2106	1.02596	0.0369757	0.890091	0.955485
1750	AT1G17370	688	620	597	1404	1542	1271	AT1G17370	934.906	869.773	1000.04	1.14977	0.201346	0.0182026	0.0493591
1751	AT1G17380	11	30	32	8	16	10	AT1G17380	22.1005	35.4705	8.7305	0.246134	-2.02248	0.00872849	0.025614
1752	AT1G17400	0	3	1	0	0	3	AT1G17400	2.39697	3.26481	1.52913	0.468368	-1.09429	0.585275	0.798465
1753	AT1G17410	2	5	16	38	32	31	AT1G17410	18.4743	12.2296	24.719	2.02124	1.01524	0.0819323	0.182142
1754	AT1G17420	346	328	352	1895	1839	1542	AT1G17420	860.088	470.502	1249.67	2.65604	1.40928	1.27031e-54	7.11112e-53
1755	AT1G17430	39	17	21	28	40	37	AT1G17430	30.8599	35.8997	25.8202	0.719232	-0.475472	0.255424	0.457893
1756	AT1G17440	176	183	172	494	556	534	AT1G17440	311.516	244.246	378.786	1.55084	0.633048	4.04936e-05	0.000177285
1757	AT1G17450	110	104	96	456	401	343	AT1G17450	213.687	142.775	284.598	1.99334	0.995186	9.78784e-09	6.44297e-08
1758	AT1G17455	19	42	24	45	52	53	AT1G17455	38.6539	40.6767	36.6312	0.900545	-0.15113	0.77314	0.937107
1759	AT1G17460	52	46	33	123	118	73	AT1G17460	67.4721	60.8009	74.1434	1.21945	0.286227	0.348976	0.565706
1760	AT1G17470	328	315	309	1331	1399	1140	AT1G17470	676.493	436.199	916.787	2.10176	1.0716	6.48346e-27	1.41792e-25
1761	AT1G17480	2	3	1	0	6	1	AT1G17480	3.20223	4.10918	2.29528	0.558574	-0.840179	0.647636	0.861467
1762	AT1G17490	384	281	282	244	221	160	AT1G17490	289.267	430.893	147.641	0.342639	-1.54524	1.29474e-21	2.1156e-20
1763	AT1G17500	123	139	169	478	526	400	AT1G17500	265.994	199.693	332.295	1.66403	0.734678	1.18672e-06	6.28132e-06
1764	AT1G17510	121	181	141	203	247	229	AT1G17510	183.979	205.25	162.707	0.792729	-0.335101	0.231698	0.423262
1765	AT1G17520	68	75	49	178	177	158	AT1G17520	105.705	88.8826	122.528	1.37853	0.463132	0.0601619	0.139954
1766	AT1G17530	609	592	533	1293	1190	970	AT1G17530	804.557	792.596	816.517	1.03018	0.0428965	0.617269	0.830494
1767	AT1G17540	0	4	2	12	4	5	AT1G17540	4.94066	4.21473	5.66659	1.34447	0.427041	0.758899	0.928688
1768	AT1G17545	0	0	0	0	0	0	AT1G17545	1.04405	1.37209	0.716013	0.52184	-0.938321	0.86677	0.937107
1769	AT1G17550	374	398	365	1681	1732	1446	AT1G17550	836.651	521.542	1151.76	2.20837	1.14298	1.52232e-36	4.76595e-35
1770	AT1G17560	23	6	18	11	28	22	AT1G17560	18.902	22.5238	15.2802	0.678404	-0.559784	0.335122	0.558285
1771	AT1G17580	62	52	55	321	384	313	AT1G17580	160.251	78.3783	242.124	3.08918	1.62722	3.35981e-15	3.73242e-14
1772	AT1G17590	14	22	10	34	18	28	AT1G17590	21.1921	22.4386	19.9456	0.888897	-0.169912	0.769064	0.937107
1773	AT1G17600	0	0	1	5	2	8	AT1G17600	3.15284	1.8506	4.45509	2.40737	1.26746	0.494801	0.727259
1774	AT1G17610	4	0	0	0	0	0	AT1G17610	1.88842	3.06082	0.716013	0.233929	-2.09586	0.343495	0.558285
1775	AT1G17615	0	0	0	0	0	0	AT1G17615	1.04405	1.37209	0.716013	0.52184	-0.938321	0.86677	0.937107
1776	AT1G17620	728	642	534	1386	1325	1079	AT1G17620	881.743	866.885	896.601	1.03428	0.0486251	0.648196	0.861783
1777	AT1G17630	16	16	12	32	51	22	AT1G17630	23.2362	21.4116	25.0607	1.17043	0.22704	0.666518	0.874273
1778	AT1G17640	67	61	34	143	154	149	AT1G17640	90.9069	74.6832	107.131	1.43447	0.520515	0.0582545	0.13602
1779	AT1G17650	52	58	52	196	220	158	AT1G17650	105.769	75.5494	135.988	1.79999	0.847987	0.000464559	0.00173538
1780	AT1G17665	30	52	35	60	57	57	AT1G17665	48.7539	55.2983	42.2096	0.763306	-0.389666	0.292786	0.502634
1781	AT1G17680	56	74	64	315	320	246	AT1G17680	149.586	90.5227	208.649	2.30493	1.20472	5.40834e-09	3.64567e-08
1782	AT1G17690	42	34	11	134	144	93	AT1G17690	64.0623	40.395	87.7295	2.17179	1.11888	0.000568244	0.0020948
1783	AT1G17700	0	0	0	0	0	0	AT1G17700	1.04405	1.37209	0.716013	0.52184	-0.938321	0.86677	0.937107
1784	AT1G17710	41	42	38	59	59	46	AT1G17710	48.0505	56.6638	39.4373	0.695987	-0.522868	0.151763	0.304322
1785	AT1G17720	281	299	278	1382	1418	1158	AT1G17720	665.681	393.98	937.382	2.37926	1.25052	3.65062e-35	1.07372e-33
1786	AT1G17730	126	88	136	197	216	174	AT1G17730	150.403	161.128	139.679	0.866887	-0.206084	0.330186	0.55175
1787	AT1G17744	114	95	88	22	25	12	AT1G17744	75.4024	136.393	14.412	0.105665	-3.24242	2.48217e-24	4.72899e-23
1788	AT1G17745	404	328	345	131	144	112	AT1G17745	291.919	491.639	92.1985	0.187533	-2.41479	1.77867e-55	1.02306e-53
1789	AT1G17750	10	1	7	11	18	8	AT1G17750	9.36008	9.41486	9.3053	0.988363	-0.0168873	1	1
1790	AT1G17760	25	15	25	174	174	145	AT1G17760	74.2013	30.9604	117.442	3.7933	1.92345	4.76586e-10	3.52912e-09
1791	AT1G17770	10	1	10	2	2	0	AT1G17770	6.22817	10.8504	1.60596	0.148009	-2.75624	0.0161682	0.0445258
1792	AT1G17780	94	68	63	164	181	130	AT1G17780	107.946	103.259	112.633	1.09079	0.125373	0.635892	0.849417
1793	AT1G17790	29	29	29	219	154	139	AT1G17790	81.415	41.1628	121.667	2.95576	1.56353	5.17425e-08	3.18342e-07
1794	AT1G17800	7	2	1	0	0	0	AT1G17800	3.23235	5.74868	0.716013	0.124553	-3.00517	0.0674321	0.154424
1795	AT1G17810	1368	1117	1124	1787	1910	1431	AT1G17810	1426.94	1643.32	1210.56	0.736656	-0.440937	2.00981e-10	1.5433e-09
1796	AT1G17820	86	78	83	239	229	157	AT1G17820	130.801	114.165	147.437	1.29144	0.368978	0.0829773	0.184179
1797	AT1G17830	66	47	60	146	145	131	AT1G17830	90.5364	80.1025	100.97	1.26051	0.334011	0.21796	0.40306
1798	AT1G17840	405	328	291	807	754	672	AT1G17840	498.307	466.222	530.392	1.13764	0.186043	0.121697	0.253689
1799	AT1G17850	63	87	49	207	175	180	AT1G17850	113.532	92.4286	134.635	1.45664	0.542647	0.0365872	0.0910946
1800	AT1G17860	629	595	594	800	888	637	AT1G17860	690.089	831.643	548.534	0.659579	-0.600383	8.02766e-10	5.82712e-09
1801	AT1G17870	11	5	3	110	120	84	AT1G17870	42.2097	9.80863	74.6108	7.60665	2.92726	5.67282e-11	4.56612e-10
1802	AT1G17880	569	555	570	1427	1622	1240	AT1G17880	895.136	775.972	1014.3	1.30713	0.386407	5.22037e-06	2.55355e-05
1803	AT1G17890	364	258	301	1577	1516	1252	AT1G17890	724.59	420.699	1028.48	2.44469	1.28965	1.83499e-39	6.35148e-38
1804	AT1G17910	0	1	0	0	0	0	AT1G17910	1.27976	1.8435	0.716013	0.388399	-1.36439	0.69833	0.878823
1805	AT1G17920	4	4	18	24	57	33	AT1G17920	20.5473	13.5596	27.5349	2.03066	1.02195	0.137949	0.280663
1806	AT1G17930	55	36	12	151	210	148	AT1G17930	84.0949	47.3047	120.885	2.55546	1.35358	0.000115031	0.000472352
1807	AT1G17940	15	14	13	23	22	20	AT1G17940	18.3391	20.5251	16.1532	0.786996	-0.345571	0.572847	0.785765
1808	AT1G17950	0	0	0	0	0	0	AT1G17950	1.04405	1.37209	0.716013	0.52184	-0.938321	0.86677	0.937107
1809	AT1G17960	10	10	3	0	12	0	AT1G17960	7.53797	11.7435	3.33247	0.283772	-1.8172	0.0694239	0.158399
1810	AT1G17970	41	18	11	39	43	39	AT1G17970	30.9715	32.4304	29.5127	0.910032	-0.136012	0.741915	0.916979
1811	AT1G17980	211	218	151	934	982	835	AT1G17980	459.289	265.473	653.105	2.46015	1.29875	1.32536e-26	2.83919e-25
1812	AT1G17990	147	174	185	518	560	392	AT1G17990	290.299	233.981	346.617	1.48139	0.566952	7.13761e-05	0.00030247
1813	AT1G18000	141	128	107	110	139	103	AT1G18000	128.172	172.44	83.9033	0.486566	-1.03929	2.0145e-06	1.03958e-05
1814	AT1G18010	148	121	113	138	105	83	AT1G18010	126.195	174.966	77.4234	0.442505	-1.17624	1.10397e-07	6.54347e-07
1815	AT1G18020	164	151	163	512	510	378	AT1G18020	275.174	219.789	330.559	1.50399	0.588792	8.27605e-05	0.000347038
1816	AT1G18030	75	44	57	178	220	139	AT1G18030	103.903	81.0524	126.753	1.56384	0.645097	0.00920936	0.0268686
1817	AT1G18040	15	12	21	28	69	21	AT1G18040	25.6085	23.4103	27.8066	1.18779	0.248285	0.654816	0.863823
1818	AT1G18050	0	0	0	8	4	2	AT1G18050	2.65891	1.37209	3.94573	2.8757	1.52391	0.444859	0.6697
1819	AT1G18060	24	39	51	98	113	71	AT1G18060	60.5654	54.2931	66.8378	1.23105	0.299895	0.325036	0.546907
1820	AT1G18070	462	355	321	1396	1448	1154	AT1G18070	731.693	517.369	946.017	1.82851	0.870671	2.00973e-19	2.9068e-18
1821	AT1G18080	9423	8544	8745	16202	16584	13480	AT1G18080	11569.4	12191.8	10947.1	0.897904	-0.155367	6.96015e-06	3.3485e-05
1822	AT1G18090	25	30	12	94	72	60	AT1G18090	42.9099	31.8109	54.009	1.69782	0.763682	0.0499505	0.118998
1823	AT1G18100	82	65	31	255	225	151	AT1G18100	115.018	81.466	148.57	1.82371	0.866873	0.00649393	0.0195695
1824	AT1G18130	0	0	0	0	0	0	AT1G18130	1.04405	1.37209	0.716013	0.52184	-0.938321	0.86677	0.937107
1825	AT1G18140	3	1	2	0	2	2	AT1G18140	2.88061	4.06706	1.69417	0.416559	-1.26341	0.458716	0.685893
1826	AT1G18150	146	165	153	378	411	320	AT1G18150	238.424	214.004	262.844	1.22822	0.296569	0.0591077	0.137761
1827	AT1G18160	210	200	196	722	864	616	AT1G18160	399.004	278.099	519.909	1.86951	0.902662	1.10888e-12	1.01782e-11
1828	AT1G18170	59	61	35	114	92	74	AT1G18170	69.2436	71.7842	66.7031	0.929216	-0.105914	0.730602	0.908071
1829	AT1G18180	13	12	7	8	5	1	AT1G18180	9.87979	15.8669	3.89272	0.245337	-2.02716	0.0175721	0.0479122
1830	AT1G18190	90	74	65	191	170	137	AT1G18190	111.807	105.355	118.26	1.12248	0.166693	0.501488	0.734313
1831	AT1G18200	0	4	14	30	27	30	AT1G18200	15.7496	9.95682	21.5423	2.16357	1.11342	0.0807453	0.179974
1832	AT1G18210	2185	1747	1932	4173	4518	3703	AT1G18210	2804.17	2671.86	2936.47	1.09904	0.136241	0.0285698	0.0733896
1833	AT1G18220	0	0	1	2	2	2	AT1G18220	1.99932	1.8506	2.14804	1.16073	0.215027	1	1
1834	AT1G18250	87	69	43	71	109	85	AT1G18250	77.4188	91.2046	63.6329	0.697694	-0.519333	0.0922271	0.2011
1835	AT1G18260	268	185	197	981	952	854	AT1G18260	479.186	295.992	662.38	2.23783	1.1621	2.16679e-22	3.70986e-21
1836	AT1G18265	31	13	24	64	64	34	AT1G18265	35.2409	32.0722	38.4096	1.1976	0.260147	0.556385	0.768536
1837	AT1G18270	196	196	149	581	552	489	AT1G18270	316.637	247.813	385.461	1.55545	0.637335	7.91408e-06	3.78003e-05
1838	AT1G18280	4	4	10	3	1	0	AT1G18280	5.67318	9.73151	1.61486	0.165941	-2.59126	0.0319612	0.0809775
1839	AT1G18290	10	29	29	54	51	31	AT1G18290	32.817	33.1414	32.4927	0.980427	-0.0285179	0.986136	1
1840	AT1G18300	3163	3099	3044	10474	10514	9035	AT1G18300	5686.56	4254.19	7118.93	1.67339	0.742776	1.92202e-51	9.84752e-50
1841	AT1G18310	1	0	0	0	4	0	AT1G18310	1.69122	1.79427	1.58816	0.885129	-0.176041	1	1
1842	AT1G18320	4	1	2	32	28	27	AT1G18320	12.9452	4.48924	21.4011	4.7672	2.25314	0.00431278	0.0135021
1843	AT1G18330	33	30	27	158	156	100	AT1G18330	70.0278	42.3659	97.6897	2.30586	1.2053	7.20675e-05	0.000305115
1844	AT1G18335	28	20	22	44	46	26	AT1G18335	30.4632	33.1484	27.7779	0.837987	-0.255001	0.601141	0.815176
1845	AT1G18340	26	30	39	83	93	71	AT1G18340	52.1129	45.1527	59.073	1.30829	0.387685	0.248152	0.447338
1846	AT1G18350	7	8	0	4	4	0	AT1G18350	5.29725	8.0986	2.4959	0.30819	-1.69811	0.157426	0.312098
1847	AT1G18360	43	30	20	96	107	78	AT1G18360	55.1056	43.2382	66.973	1.54893	0.631273	0.0716152	0.162499
1848	AT1G18370	3	24	4	9	14	4	AT1G18370	11.3807	15.8664	6.89512	0.434574	-1.20233	0.43958	0.663516
1849	AT1G18390	168	117	139	370	435	352	AT1G18390	234.45	193.965	274.935	1.41744	0.503289	0.00250705	0.00821967
1850	AT1G18400	1	3	1	0	0	0	AT1G18400	2.2015	3.687	0.716013	0.1942	-2.36439	0.264669	0.46775
1851	AT1G18410	1	5	0	0	2	2	AT1G18410	2.92273	4.1513	1.69417	0.408106	-1.29298	0.459971	0.686938
1852	AT1G18420	2	5	3	6	0	6	AT1G18420	4.85643	6.009	3.70387	0.616386	-0.698094	0.587308	0.800596
1853	AT1G18440	26	11	36	74	76	72	AT1G18440	44.1778	34.7605	53.595	1.54183	0.624648	0.106451	0.227215
1854	AT1G18450	94	46	77	416	426	330	AT1G18450	188.518	99.5868	277.448	2.78599	1.47819	6.91253e-15	7.55271e-14
1855	AT1G18460	251	193	253	1474	1567	1119	AT1G18460	649.78	319.383	980.178	3.06897	1.61776	2.33479e-51	1.19399e-49
1856	AT1G18470	113	100	108	397	346	313	AT1G18470	199.492	147.898	251.086	1.6977	0.76358	1.87484e-05	8.55101e-05
1857	AT1G18480	125	121	113	594	657	505	AT1G18480	290.449	165.256	415.642	2.51514	1.33064	1.35939e-18	1.87354e-17
1858	AT1G18485	18	37	19	50	64	34	AT1G18485	35.3688	35.505	35.2326	0.992327	-0.0111118	0.986968	1
1859	AT1G18486	0	0	0	0	0	0	AT1G18486	1.04405	1.37209	0.716013	0.52184	-0.938321	0.86677	0.937107
1860	AT1G18490	29	7	18	114	65	63	AT1G18490	41.6815	25.5283	57.8346	2.26551	1.17983	0.0206092	0.0549863
1861	AT1G18500	159	147	165	444	458	316	AT1G18500	251.867	216.749	286.985	1.32404	0.40495	0.00829546	0.0244461
1862	AT1G18510	0	1	0	0	0	0	AT1G18510	1.27976	1.8435	0.716013	0.388399	-1.36439	0.69833	0.878823
1863	AT1G18520	0	0	0	2	0	0	AT1G18520	1.27099	1.37209	1.16988	0.852627	-0.230014	1	1
1864	AT1G18530	0	0	0	0	0	0	AT1G18530	1.04405	1.37209	0.716013	0.52184	-0.938321	0.86677	0.937107
1865	AT1G18540	1514	1320	1240	3807	3868	3261	AT1G18540	2224.02	1856.16	2591.89	1.39637	0.481685	2.25853e-16	2.69145e-15
1866	AT1G18550	14	9	11	45	71	66	AT1G18550	30.5431	16.7889	44.2974	2.6385	1.39972	0.00344445	0.0109923
1867	AT1G18560	39	28	18	71	55	56	AT1G18560	41.8242	39.6496	43.9987	1.10969	0.150155	0.774146	0.937107
1868	AT1G18570	104	117	121	277	266	160	AT1G18570	161.637	158.333	164.942	1.04174	0.0589954	0.694075	0.878823
1869	AT1G18580	69	54	51	285	331	248	AT1G18580	142.572	80.3623	204.781	2.54822	1.34949	4.27291e-10	3.17794e-09
1870	AT1G18590	55	23	28	86	75	71	AT1G18590	52.3308	48.8326	55.8291	1.14328	0.193174	0.667165	0.874994
1871	AT1G18600	68	107	55	261	291	214	AT1G18600	144.118	106.839	181.398	1.69787	0.763723	0.00213821	0.00709751
1872	AT1G18610	27	32	12	114	95	76	AT1G18610	50.7486	33.598	67.8993	2.02093	1.01502	0.00470287	0.0146074
1873	AT1G18620	24	31	35	33	34	23	AT1G18620	32.3589	42.8657	21.8521	0.50978	-0.972055	0.0322725	0.0816142
1874	AT1G18630	57	61	76	143	154	108	AT1G18630	93.2883	90.5587	96.0179	1.06028	0.0844504	0.699875	0.879848
1875	AT1G18640	113	122	98	300	367	288	AT1G18640	190.18	153.484	226.876	1.47818	0.563819	0.00185709	0.00623214
1876	AT1G18650	64	28	42	107	84	59	AT1G18650	60.4965	61.6883	59.3046	0.961359	-0.0568534	0.859783	0.937107
1877	AT1G18660	92	55	77	286	281	223	AT1G18660	145.158	102.985	187.33	1.819	0.863147	4.31461e-05	0.000188471
1878	AT1G18670	31	15	26	124	131	106	AT1G18670	60.0606	33.972	86.1492	2.53589	1.34249	6.16359e-05	0.000263824
1879	AT1G18680	34	16	12	46	75	39	AT1G18680	33.5446	29.0108	38.0784	1.31256	0.392383	0.430528	0.662565
1880	AT1G18690	16	13	11	116	125	95	AT1G18690	49.7814	19.5188	80.044	4.10086	2.03593	9.20376e-08	5.50445e-07
1881	AT1G18700	89	88	95	380	411	275	AT1G18700	188.494	125.888	251.101	1.99464	0.996126	4.64313e-08	2.86832e-07
1882	AT1G18710	1	8	4	0	0	0	AT1G18710	4.09778	7.47954	0.716013	0.0957296	-3.38489	0.0264046	0.0686051
1883	AT1G18720	315	337	376	842	966	790	AT1G18720	544.842	473.141	616.542	1.30308	0.381927	0.00247496	0.00812032
1884	AT1G18730	0	0	6	18	12	2	AT1G18730	6.10126	4.24314	7.95938	1.87582	0.907524	0.415987	0.647897
1885	AT1G18740	4265	4079	3680	12250	11960	9934	AT1G18740	6783.33	5485.74	8080.92	1.47308	0.558832	1.05708e-32	2.89909e-31
1886	AT1G18750	7	4	4	37	30	14	AT1G18750	13.7877	8.12701	19.4483	2.39305	1.25885	0.0779945	0.174946
1887	AT1G18760	2	0	0	0	0	0	AT1G18760	1.46623	2.21646	0.716013	0.323044	-1.6302	0.555354	0.768536
1888	AT1G18770	1	0	0	0	0	0	AT1G18770	1.25514	1.79427	0.716013	0.399054	-1.32534	0.696842	0.878823
1889	AT1G18773	10	3	4	3	9	10	AT1G18773	7.49586	8.92215	6.06956	0.68028	-0.555799	0.53519	0.767132
1890	AT1G18780	0	12	6	0	0	0	AT1G18780	5.308	9.89999	0.716013	0.0723246	-3.78937	0.0370005	0.0918967
1891	AT1G18790	4	0	0	0	0	0	AT1G18790	1.88842	3.06082	0.716013	0.233929	-2.09586	0.343495	0.558285
1892	AT1G18800	108	122	129	230	248	239	AT1G18800	168.985	166.206	171.763	1.03343	0.0474431	0.803915	0.937107
1893	AT1G18810	0	0	3	0	0	0	AT1G18810	1.76181	2.80762	0.716013	0.255025	-1.97129	0.438219	0.662565
1894	AT1G18830	0	5	4	3	7	2	AT1G18830	4.55415	5.64315	3.46516	0.614048	-0.703576	0.66502	0.872686
1895	AT1G18835	0	0	0	0	0	0	AT1G18835	1.04405	1.37209	0.716013	0.52184	-0.938321	0.86677	0.937107
1896	AT1G18840	127	54	65	193	206	141	AT1G18840	119.597	111.548	127.647	1.14432	0.194495	0.629081	0.842221
1897	AT1G18850	43	53	91	203	152	196	AT1G18850	110.552	88.0545	133.049	1.51099	0.595494	0.130769	0.268993
1898	AT1G18860	1	0	0	0	0	0	AT1G18860	1.25514	1.79427	0.716013	0.399054	-1.32534	0.696842	0.878823
1899	AT1G18870	5	4	2	0	3	2	AT1G18870	4.11892	6.32563	1.91221	0.302295	-1.72597	0.20327	0.384279
1900	AT1G18871	0	0	0	0	0	0	AT1G18871	1.04405	1.37209	0.716013	0.52184	-0.938321	0.86677	0.937107
1901	AT1G18880	18	6	12	16	18	8	AT1G18880	13.9909	17.5419	10.44	0.595146	-0.748684	0.276042	0.479626
1902	AT1G18890	159	102	143	407	465	361	AT1G18890	238.66	185.009	292.312	1.57999	0.659914	5.72039e-05	0.000246287
1903	AT1G18900	146	137	132	522	678	482	AT1G18900	294.202	190.756	397.647	2.08459	1.05976	8.91546e-13	8.24453e-12
1904	AT1G18910	21	33	14	165	207	128	AT1G18910	75.2403	32.4934	117.987	3.63112	1.86041	8.18505e-10	5.93504e-09
1905	AT1G18940	11	3	7	14	4	14	AT1G18940	9.66984	10.7799	8.55982	0.794057	-0.332685	0.661559	0.868982
1906	AT1G18950	159	79	81	369	399	311	AT1G18950	200.122	144.499	255.746	1.76988	0.82365	0.000409541	0.00154535
1907	AT1G18960	0	0	0	0	0	0	AT1G18960	1.04405	1.37209	0.716013	0.52184	-0.938321	0.86677	0.937107
1908	AT1G18970	0	0	0	0	0	2	AT1G18970	1.31509	1.37209	1.25809	0.916916	-0.125139	1	1
1909	AT1G18980	24	21	27	20	26	14	AT1G18980	24.521	34.3236	14.7183	0.428808	-1.2216	0.0185973	0.050299
1910	AT1G18990	11	10	3	0	1	4	AT1G18990	7.09193	12.1657	2.01821	0.165894	-2.59166	0.00974668	0.0282364
1911	AT1G19000	510	441	504	2204	2291	1869	AT1G19000	1086.36	665.742	1506.98	2.26361	1.17863	2.3395e-48	1.08246e-46
1912	AT1G19010	18	22	20	93	75	73	AT1G19010	43.4361	28.9124	57.9597	2.00467	1.00336	0.00922196	0.0268969
1913	AT1G19020	807	734	807	544	531	467	AT1G19020	720.381	1074.24	366.523	0.341193	-1.55134	3.70092e-58	2.28835e-56
1914	AT1G19025	8	9	22	40	37	36	AT1G19025	23.5688	19.5194	27.6183	1.41492	0.500718	0.328176	0.55093
1915	AT1G19040	0	2	0	0	0	0	AT1G19040	1.51546	2.3149	0.716013	0.309306	-1.69289	0.55626	0.768536
1916	AT1G19050	1	11	0	5	0	1	AT1G19050	4.55073	6.97972	2.12173	0.303985	-1.71793	0.409369	0.64058
1917	AT1G19060	1	2	1	0	0	0	AT1G19060	1.9658	3.21559	0.716013	0.222669	-2.16703	0.342207	0.558285
1918	AT1G19070	0	1	0	10	0	2	AT1G19070	2.68547	1.8435	3.52744	1.91345	0.936177	0.656434	0.864462
1919	AT1G19080	18	11	15	34	26	23	AT1G19080	20.8346	21.3344	20.3347	0.953141	-0.0692381	0.920541	0.975585
1920	AT1G19086	0	0	0	0	0	0	AT1G19086	1.04405	1.37209	0.716013	0.52184	-0.938321	0.86677	0.937107
1921	AT1G19090	3	9	11	7	10	8	AT1G19090	9.39906	12.1449	6.65326	0.547825	-0.868213	0.339303	0.558285
1922	AT1G19100	22	37	43	94	128	106	AT1G19100	63.6824	48.6779	78.687	1.61648	0.692859	0.0237851	0.0624912
1923	AT1G19110	63	72	79	342	347	271	AT1G19110	163.576	99.7127	227.439	2.28094	1.18963	1.69877e-09	1.20044e-08
1924	AT1G19115	2	2	1	0	0	2	AT1G19115	2.44793	3.63777	1.25809	0.345842	-1.53182	0.4097	0.64058
1925	AT1G19120	154	141	116	295	262	210	AT1G19120	185.035	188.363	181.706	0.96466	-0.0519073	0.780624	0.937107
1926	AT1G19130	315	341	355	814	899	718	AT1G19130	520.521	464.978	576.064	1.23891	0.309066	0.00408359	0.0128467
1927	AT1G19140	170	159	95	452	506	414	AT1G19140	259.691	193.554	325.828	1.68339	0.751373	2.22048e-05	0.000100366
1928	AT1G19150	9	9	11	17	4	13	AT1G19150	11.8238	14.6779	8.96958	0.611092	-0.710537	0.340067	0.558285
1929	AT1G19160	8	2	0	0	4	0	AT1G19160	3.64026	5.69235	1.58816	0.279	-1.84166	0.207788	0.389546
1930	AT1G19170	51	50	15	176	184	119	AT1G19170	83.3403	53.6512	113.029	2.10674	1.07502	0.001032	0.00363028
1931	AT1G19180	1399	1005	1258	1529	1665	1305	AT1G19180	1366.08	1667.73	1064.44	0.638258	-0.647789	2.42488e-06	1.2389e-05
1932	AT1G19190	56	62	19	40	9	15	AT1G19190	39.5772	63.333	15.8214	0.249812	-2.00108	0.00915129	0.0267135
1933	AT1G19200	16	19	17	8	14	14	AT1G19200	17.2984	25.2183	9.37859	0.371896	-1.42703	0.0195092	0.0524371
1934	AT1G19210	1577	1356	1442	4372	4443	3657	AT1G19210	2474.6	1996.38	2952.81	1.47908	0.5647	5.26466e-24	9.85756e-23
1935	AT1G19220	269	280	243	617	619	554	AT1G19220	394.533	363.209	425.857	1.17248	0.229566	0.0711129	0.161467
1936	AT1G19230	43	23	25	102	110	114	AT1G19230	60.5385	42.3309	78.7461	1.86025	0.895499	0.00808476	0.0238795
1937	AT1G19240	86	50	42	110	165	120	AT1G19240	87.7636	81.3472	94.1799	1.15775	0.211327	0.561083	0.773216
1938	AT1G19250	14	10	5	0	0	0	AT1G19250	7.55261	14.3892	0.716013	0.0497604	-4.32886	0.000143848	0.000581074
1939	AT1G19260	0	2	1	3	2	0	AT1G19260	2.31315	2.79341	1.83289	0.656149	-0.607904	0.850209	0.937107
1940	AT1G19270	66	52	12	170	169	109	AT1G19270	82.589	59.4912	105.687	1.77651	0.829047	0.0543769	0.128074
1941	AT1G19290	12	14	4	91	79	80	AT1G19290	37.6136	14.952	60.2753	4.03126	2.01123	5.24837e-06	2.56627e-05
1942	AT1G19300	221	229	259	216	233	171	AT1G19300	236.722	326.559	146.885	0.449795	-1.15266	6.15032e-11	4.94169e-10
1943	AT1G19310	629	614	629	706	853	677	AT1G19310	693.88	857.348	530.413	0.618667	-0.692765	8.45597e-13	7.84628e-12
1944	AT1G19320	19	5	18	9	4	4	AT1G19320	12.5392	20.3637	4.71474	0.231527	-2.11075	0.00729274	0.0217312
1945	AT1G19330	16	19	13	16	21	18	AT1G19330	18.5544	23.3043	13.8045	0.592359	-0.755457	0.200435	0.380719
1946	AT1G19340	7	0	14	58	34	27	AT1G19340	19.818	11.0265	28.6096	2.59463	1.37553	0.0387607	0.095553
1947	AT1G19350	33	53	24	123	127	105	AT1G19350	68.2759	51.7727	84.7791	1.63752	0.711516	0.0186461	0.050411
1948	AT1G19360	101	79	55	312	350	238	AT1G19360	159.956	107.571	212.341	1.97395	0.981087	1.18023e-06	6.25062e-06
1949	AT1G19370	162	163	154	643	535	441	AT1G19370	301.554	220.295	382.814	1.73774	0.797211	5.68023e-08	3.47429e-07
1950	AT1G19380	593	504	508	696	611	548	AT1G19380	586.405	732.395	440.414	0.601334	-0.733762	1.43422e-12	1.3063e-11
1951	AT1G19390	0	0	0	0	0	0	AT1G19390	1.04405	1.37209	0.716013	0.52184	-0.938321	0.86677	0.937107
1952	AT1G19394	1	2	0	11	24	23	AT1G19394	8.70811	2.73708	14.6791	5.36306	2.42306	0.0144344	0.0401577
1953	AT1G19396	6	22	3	52	50	45	AT1G19396	25.6635	15.7116	35.6153	2.26682	1.18067	0.0252372	0.0659307
1954	AT1G19397	20	31	5	104	71	69	AT1G19397	42.6608	26.8218	58.4997	2.18105	1.12502	0.0179041	0.0486563
1955	AT1G19400	188	142	197	392	473	322	AT1G19400	261.014	241.948	280.081	1.15761	0.211152	0.185754	0.357373
1956	AT1G19410	2	0	2	1	1	1	AT1G19410	2.30275	3.17347	1.43203	0.451249	-1.148	0.580675	0.794062
1957	AT1G19430	68	58	54	299	294	219	AT1G19430	137.646	83.2613	192.031	2.30636	1.20562	3.02481e-08	1.90626e-07
1958	AT1G19440	67	102	64	187	179	143	AT1G19440	114.653	108.366	120.94	1.11604	0.158384	0.509177	0.740943
1959	AT1G19450	194	133	157	347	383	337	AT1G19450	237.705	221.098	254.312	1.15022	0.201913	0.245496	0.443342
1960	AT1G19460	2	0	0	0	0	0	AT1G19460	1.46623	2.21646	0.716013	0.323044	-1.6302	0.555354	0.768536
1961	AT1G19470	3	0	0	0	0	2	AT1G19470	1.94837	2.63864	1.25809	0.476797	-1.06855	0.614083	0.828296
1962	AT1G19480	79	96	58	198	217	197	AT1G19480	127.045	107.733	146.358	1.35853	0.442048	0.0489201	0.11699
1963	AT1G19485	37	28	31	173	191	137	AT1G19485	81.8897	45.0259	118.754	2.63745	1.39914	9.07708e-07	4.87949e-06
1964	AT1G19490	148	169	167	1093	1356	1015	AT1G19490	521.477	223.433	819.521	3.66786	1.87494	2.24781e-42	8.61324e-41
1965	AT1G19500	0	0	0	0	0	0	AT1G19500	1.04405	1.37209	0.716013	0.52184	-0.938321	0.86677	0.937107
1966	AT1G19510	0	0	0	0	0	0	AT1G19510	1.04405	1.37209	0.716013	0.52184	-0.938321	0.86677	0.937107
1967	AT1G19520	126	124	179	625	673	478	AT1G19520	308.761	198.674	418.847	2.10821	1.07602	1.33331e-10	1.04086e-09
1968	AT1G19530	2510	2059	2266	2225	2370	1880	AT1G19530	2323.96	3115.97	1531.95	0.491646	-1.02431	1.17782e-50	5.92305e-49
1969	AT1G19540	102	143	179	539	512	427	AT1G19540	273.951	197.498	350.404	1.77421	0.827177	7.44729e-05	0.000314662
1970	AT1G19550	36	25	32	89	93	64	AT1G19550	51.1026	43.668	58.5373	1.34051	0.422781	0.2317	0.423262
1971	AT1G19570	744	540	514	1245	1294	1007	AT1G19570	827.157	815.986	838.329	1.02738	0.038971	0.814009	0.937107
1972	AT1G19580	168	114	98	429	518	412	AT1G19580	247.808	172.932	322.683	1.86595	0.899911	6.6935e-08	4.06481e-07
1973	AT1G19600	328	231	283	1437	1383	1271	AT1G19600	678.51	384.16	972.86	2.53244	1.34053	9.04631e-35	2.63224e-33
1974	AT1G19610	0	0	3	4	9	2	AT1G19610	3.46789	2.80762	4.12817	1.47035	0.556158	0.742982	0.916979
1975	AT1G19620	1	0	0	2	0	0	AT1G19620	1.48208	1.79427	1.16988	0.652009	-0.617036	0.888719	0.954275
1976	AT1G19630	15	17	14	23	21	20	AT1G19630	19.1765	22.4178	15.9351	0.710825	-0.492435	0.405132	0.636632
1977	AT1G19640	10	0	11	4	0	0	AT1G19640	6.24062	10.8575	1.62375	0.149551	-2.74129	0.0473931	0.113892
1978	AT1G19650	8	27	14	108	136	84	AT1G19650	50.911	24.1766	77.6455	3.2116	1.68329	2.99396e-06	1.5126e-05
1979	AT1G19660	251	281	271	814	797	648	AT1G19660	452.166	369.48	534.851	1.44758	0.533642	4.99815e-06	2.45097e-05
1980	AT1G19670	13	6	14	7	14	0	AT1G19670	10.8725	16.388	5.35709	0.326891	-1.61312	0.0500468	0.119165
1981	AT1G19680	387	405	379	1479	1608	1287	AT1G19680	786.408	537.029	1035.79	1.92873	0.947654	9.87051e-25	1.91812e-23
1982	AT1G19690	17	38	30	169	175	151	AT1G19690	79.4848	40.8178	118.152	2.89461	1.53337	9.28925e-08	5.5507e-07
1983	AT1G19700	72	68	78	134	135	71	AT1G19700	90.4763	101.148	79.8043	0.788983	-0.341933	0.227443	0.416941
1984	AT1G19710	28	47	26	68	87	51	AT1G19710	48.3652	47.7904	48.9399	1.02405	0.0342921	0.89405	0.957017
1985	AT1G19715	41	57	23	115	149	124	AT1G19715	74.7337	56.5573	92.9102	1.64276	0.716124	0.0277091	0.0714485
1986	AT1G19720	26	29	19	137	128	109	AT1G19720	62.1848	35.1112	89.2583	2.54216	1.34606	3.82885e-05	0.000168067
1987	AT1G19730	193	131	143	302	279	270	AT1G19730	208.149	213.034	203.264	0.95414	-0.0677279	0.628156	0.841264
1988	AT1G19740	253	227	215	572	533	440	AT1G19740	342.033	318.072	365.995	1.15067	0.20247	0.137341	0.279678
1989	AT1G19750	26	15	16	42	44	27	AT1G19750	27.1175	27.076	27.159	1.00307	0.0044179	1	1
1990	AT1G19770	2999	2889	2865	5641	6051	4595	AT1G19770	3922.97	4000.31	3845.63	0.961335	-0.056889	0.274844	0.478003
1991	AT1G19780	4	6	2	0	2	5	AT1G19780	4.67678	6.84626	2.50729	0.366228	-1.44919	0.236181	0.4299
1992	AT1G19790	2	4	6	3	1	0	AT1G19790	4.29399	6.97312	1.61486	0.231583	-2.1104	0.133473	0.273048
1993	AT1G19800	161	169	161	363	363	253	AT1G19800	228.432	226.05	230.814	1.02107	0.0300887	0.802689	0.937107
1994	AT1G19830	30	18	20	37	5	24	AT1G19830	24.4004	32.093	16.7078	0.520605	-0.941738	0.0532512	0.125673
1995	AT1G19835	62	52	49	50	44	34	AT1G19835	53.1895	75.5072	30.8718	0.408859	-1.29033	0.000167431	0.000670067
1996	AT1G19840	1	0	0	1	0	6	AT1G19840	2.18173	1.79427	2.56919	1.43188	0.517913	0.946102	0.994731
1997	AT1G19850	55	57	49	87	99	45	AT1G19850	64.5755	74.909	54.2419	0.724104	-0.465731	0.156378	0.310904
[truncated: 25,209 more rows]
