# Supplementary material for: Combinations of maternal-specific repressive epigenetic marks in the endosperm control seed dormancy
Source: eLife journal article supplement (doi:10.7554/elife.64593), 2021-08-24
Supplement: supp [file elife-64593-supp-v1.zip › elife_poa_e64593_Figure_8_figure_supplement_5.pdf]

| Fertilization            |                                |                                                                                   |                                                                                    |                                                                                                                            |
|--------------------------|--------------------------------|-----------------------------------------------------------------------------------|------------------------------------------------------------------------------------|----------------------------------------------------------------------------------------------------------------------------|
| Event in seeds           |                                | Development                                                                       | Dormancy                                                                           | Germination (no dormancy)                                                                                                  |
| Cell type                | Central cell                   | Cellularized endosperm                                                            | Micropylar Peripheral? Chalazal?                                                   | Micropylar Peripheral? Chalazal?                                                                                           |
| single H3K27me3          | FIS2-PRC2                      | 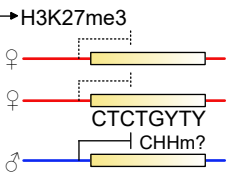 | 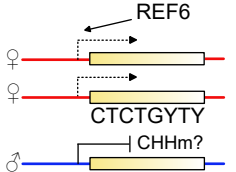 | 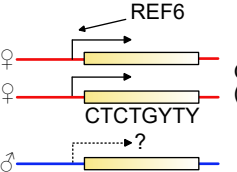 <p>Germination-related (EDF4 etc.)</p> |
| double H3K27me3/ H3K9me2 | FIS2-PRC2<br>SUVH4/5/6<br>CMT3 | 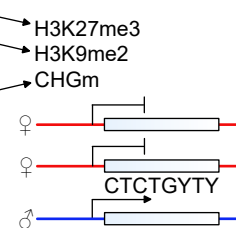 | 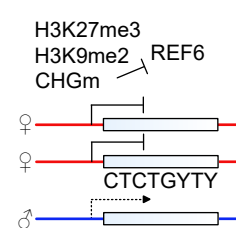 | 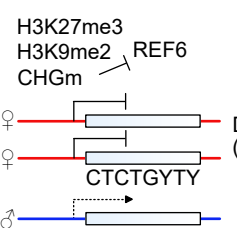 <p>Dormancy-related (ABI3 etc.)</p>    |
| single H3K9me2           | SUVH?                          | 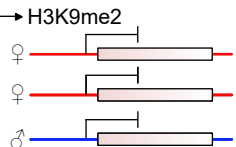 | 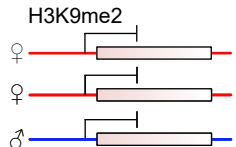 | 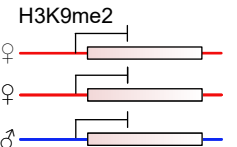                                        |
