# Supplementary figures and images for: Combinations of maternal-specific repressive epigenetic marks in the endosperm control seed dormancy
Source: eLife journal article supplement (doi:10.7554/elife.64593), 2021-08-24

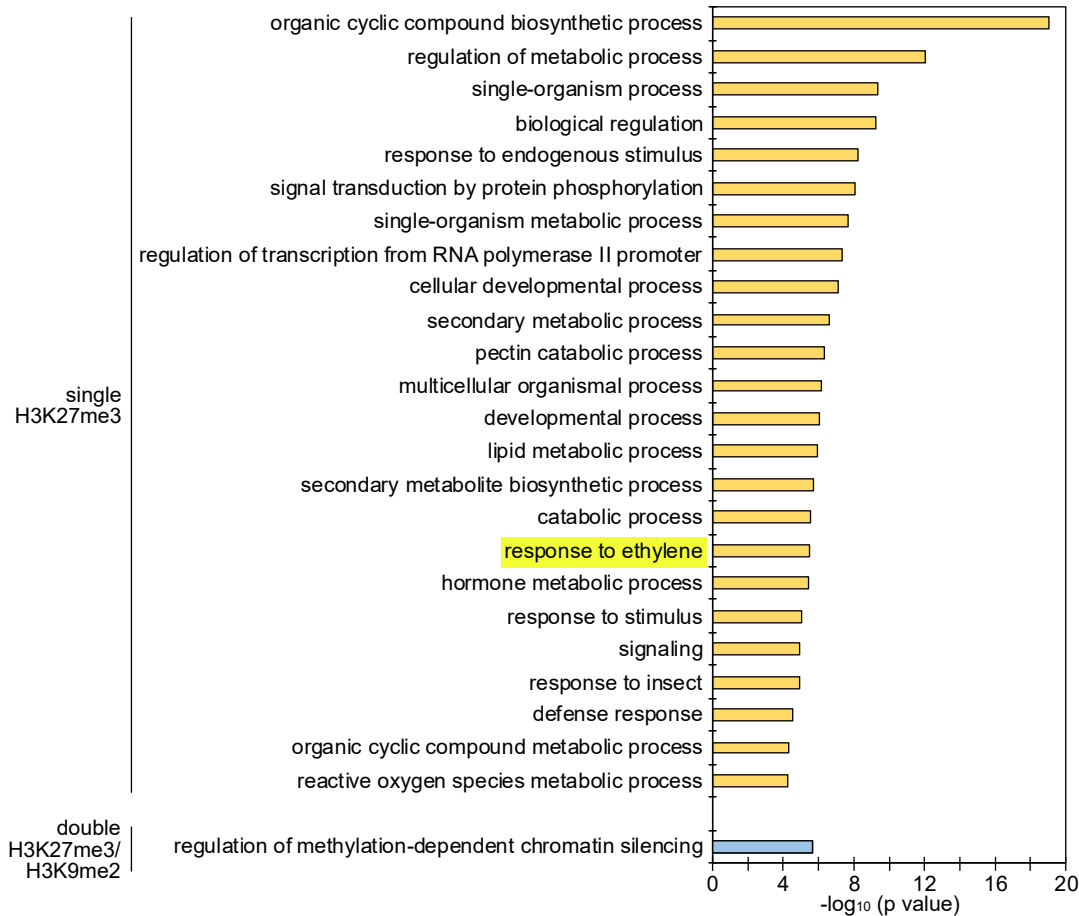

Supplement: supp [file elife-64593-supp-v1.zip › elife_poa_e64593_Figure_1_figure_supplement_1.pdf]

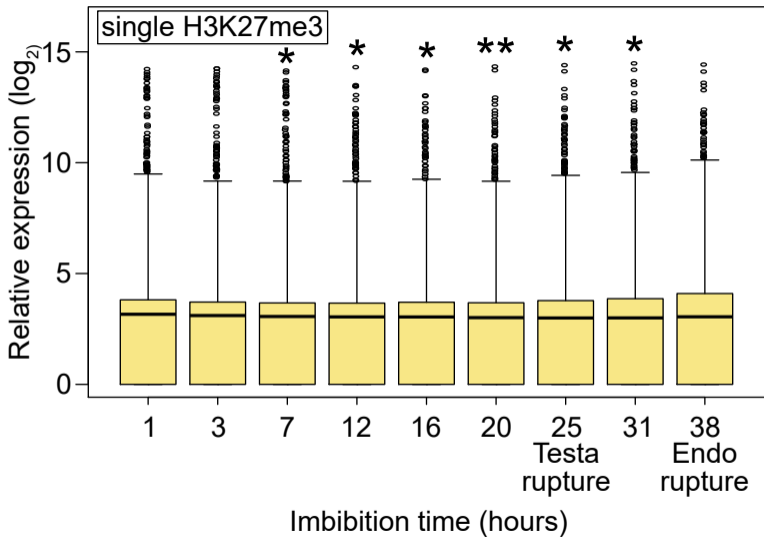

Supplement: supp [file elife-64593-supp-v1.zip › elife_poa_e64593_Figure_1_figure_supplement_2.pdf]

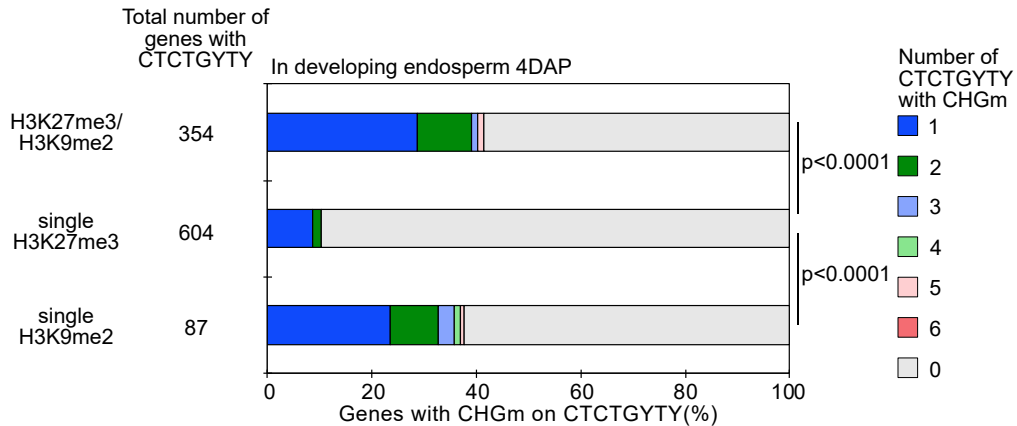

Supplement: supp [file elife-64593-supp-v1.zip › elife_poa_e64593_Figure_2_figure_supplement_1.pdf]

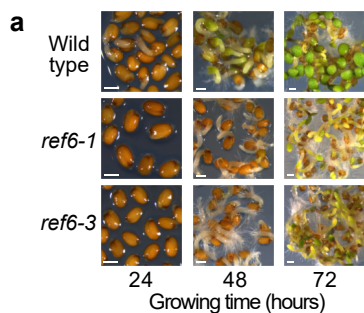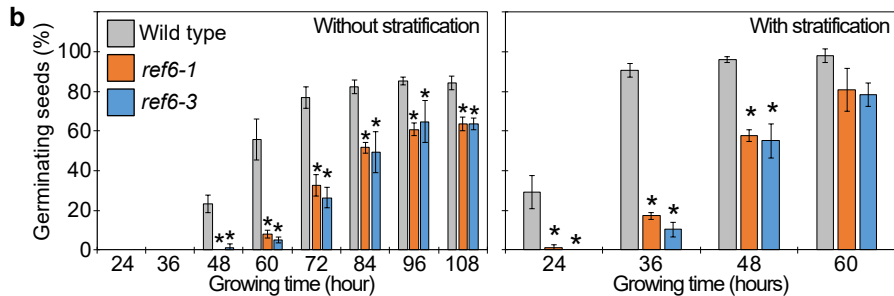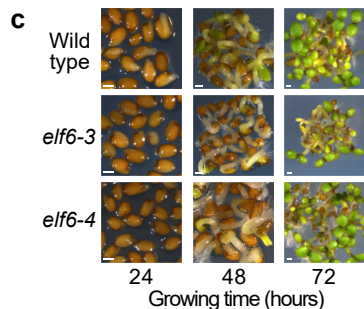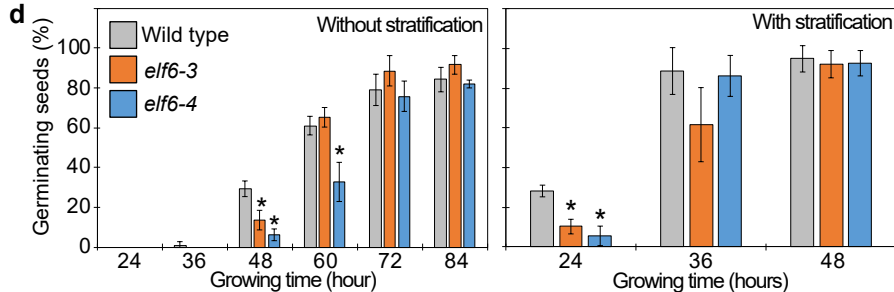

Supplement: supp [file elife-64593-supp-v1.zip › elife_poa_e64593_Figure_3_figure_supplement_2.pdf]

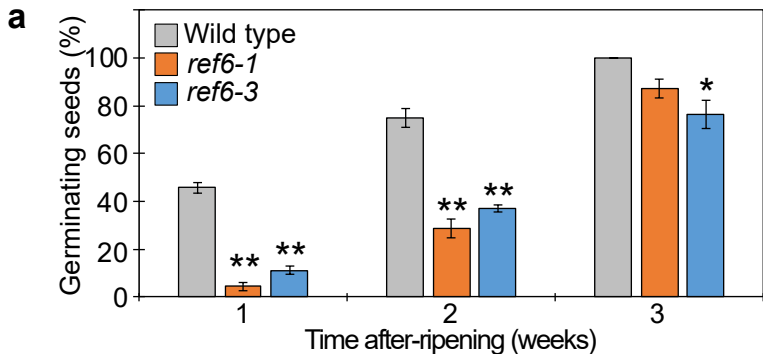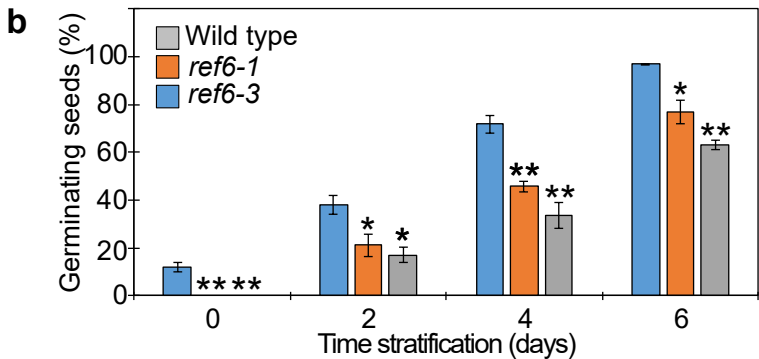

Supplement: supp [file elife-64593-supp-v1.zip › elife_poa_e64593_Figure_3_figure_supplement_3.pdf]

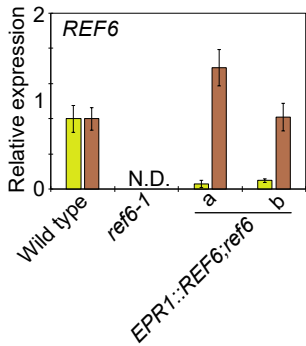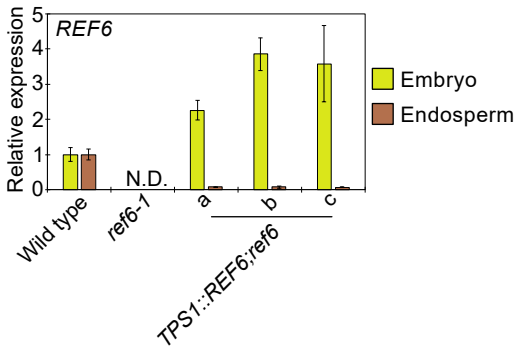

Supplement: supp [file elife-64593-supp-v1.zip › elife_poa_e64593_Figure_4_figure_supplement_1.pdf]

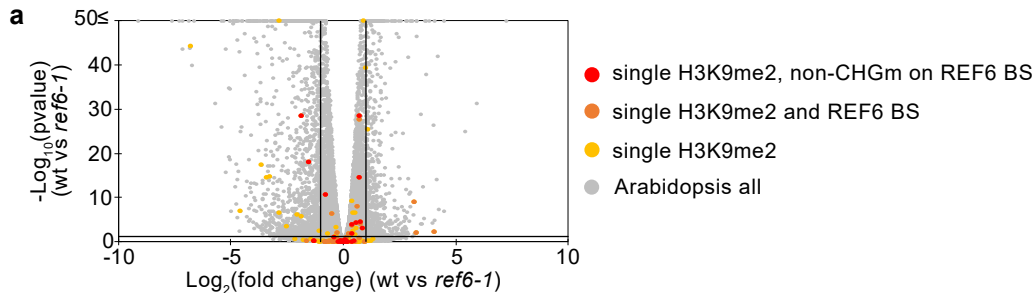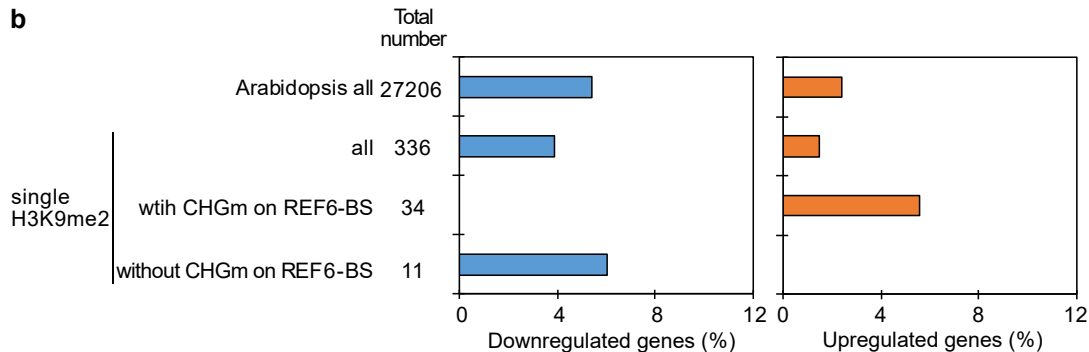

Supplement: supp [file elife-64593-supp-v1.zip › elife_poa_e64593_Figure_5_figure_supplement_1.pdf]

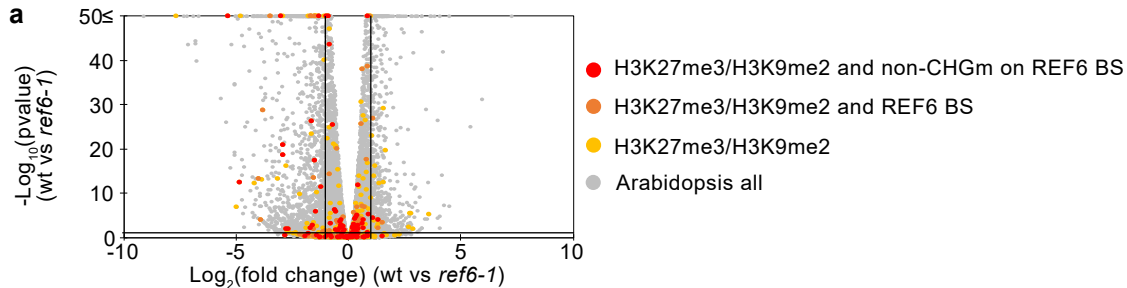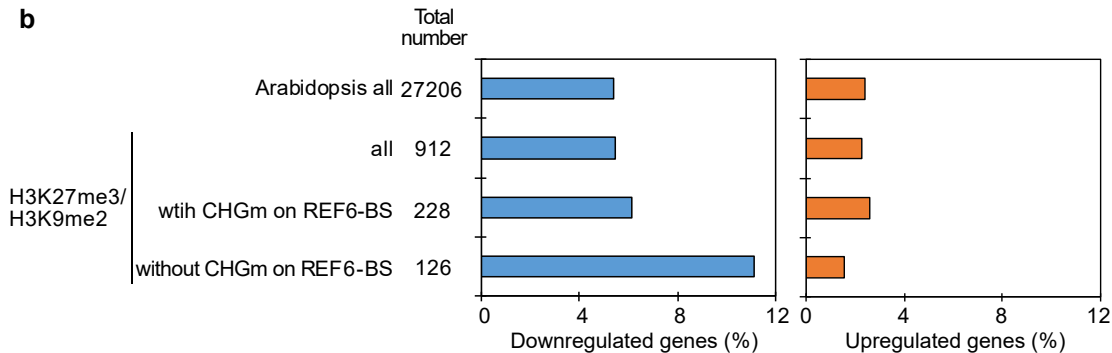

Supplement: supp [file elife-64593-supp-v1.zip › elife_poa_e64593_Figure_5_figure_supplement_2.pdf]

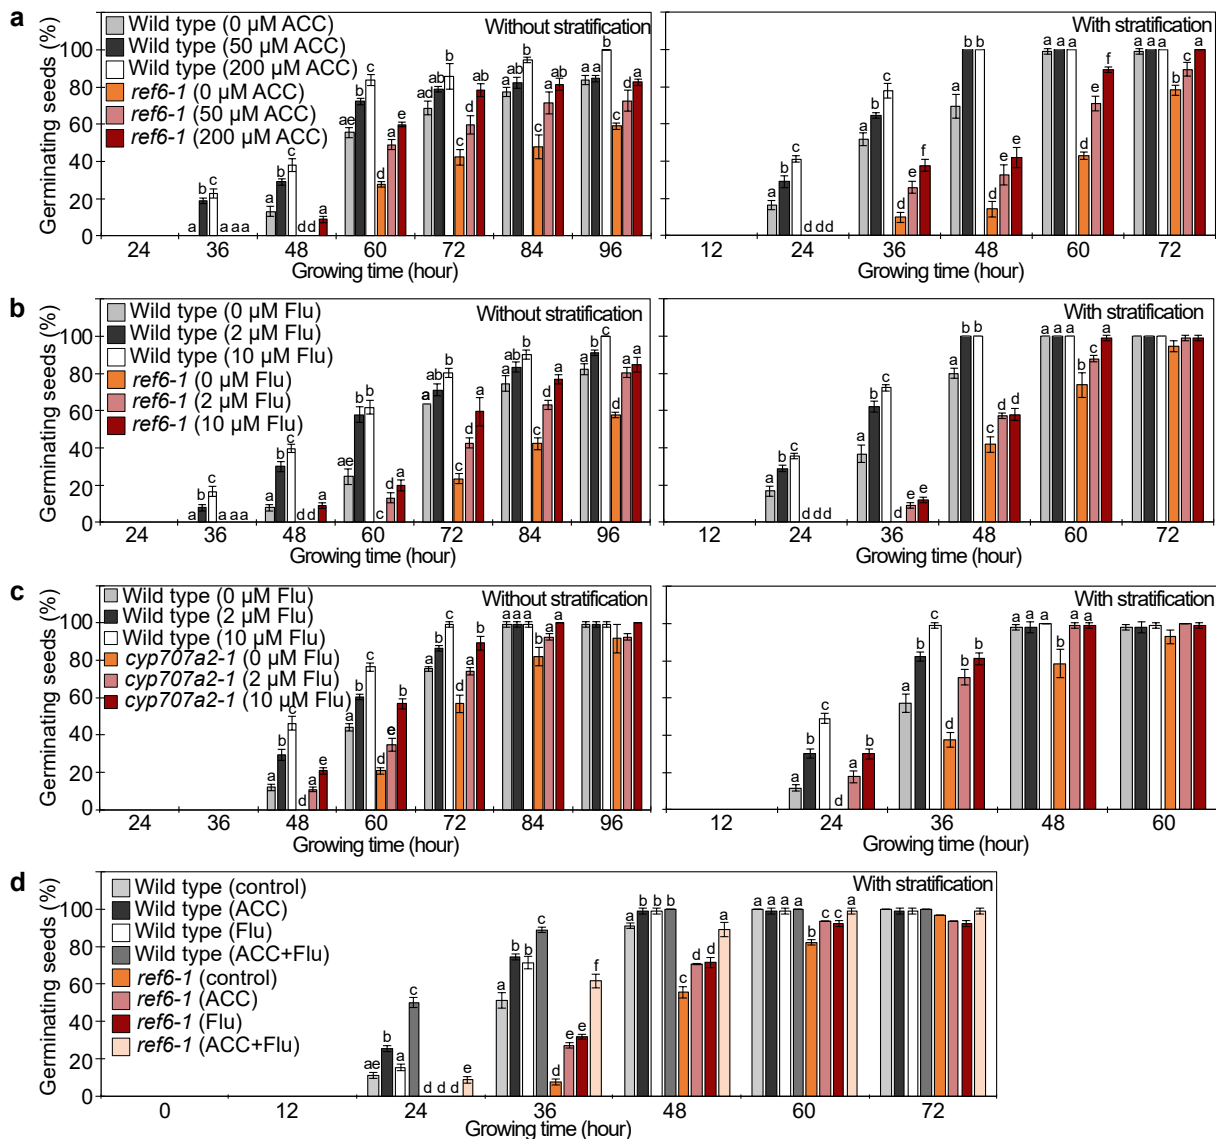

Supplement: supp [file elife-64593-supp-v1.zip › elife_poa_e64593_Figure_5_figure_supplement_4.pdf]

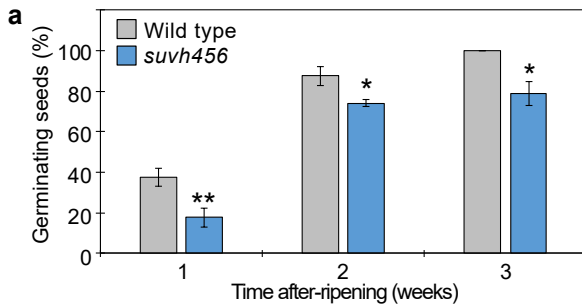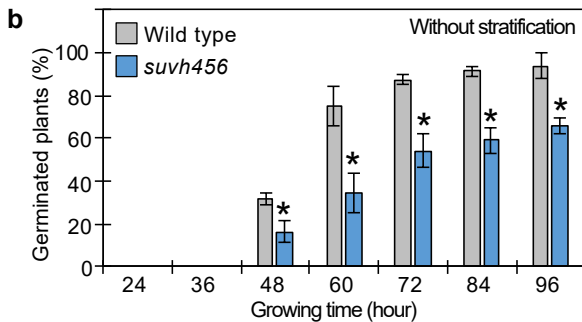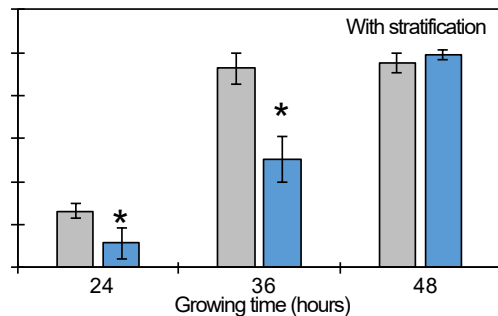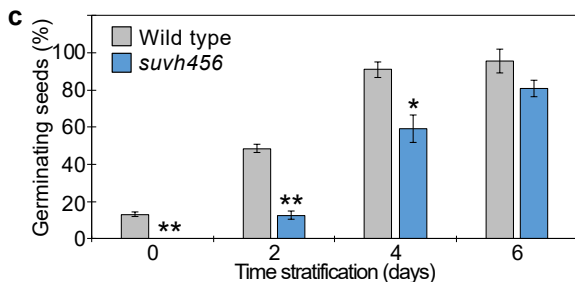

Supplement: supp [file elife-64593-supp-v1.zip › elife_poa_e64593_Figure_6_figure_supplement_1.pdf]

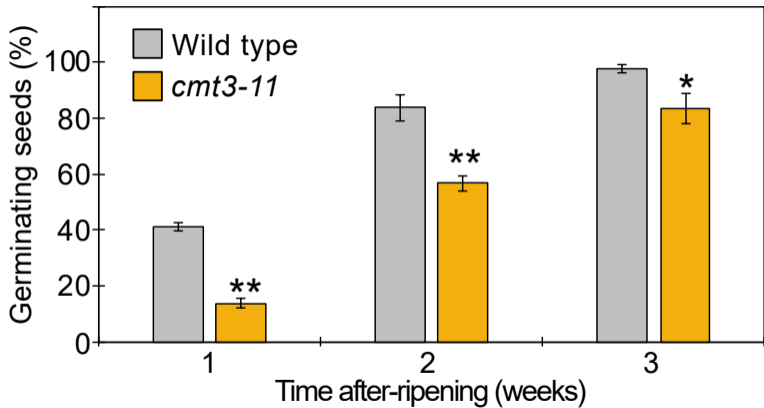

Supplement: supp [file elife-64593-supp-v1.zip › elife_poa_e64593_Figure_6_figure_supplement_2.pdf]

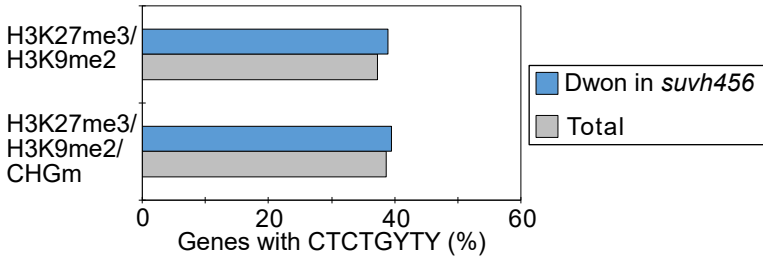

Supplement: supp [file elife-64593-supp-v1.zip › elife_poa_e64593_Figure_7_figure_supplement_1.pdf]

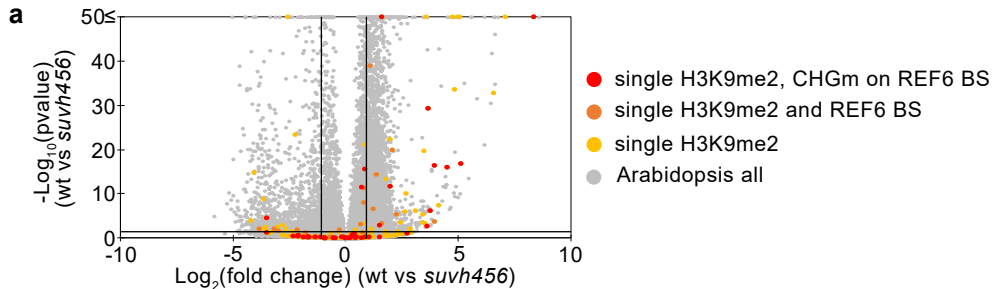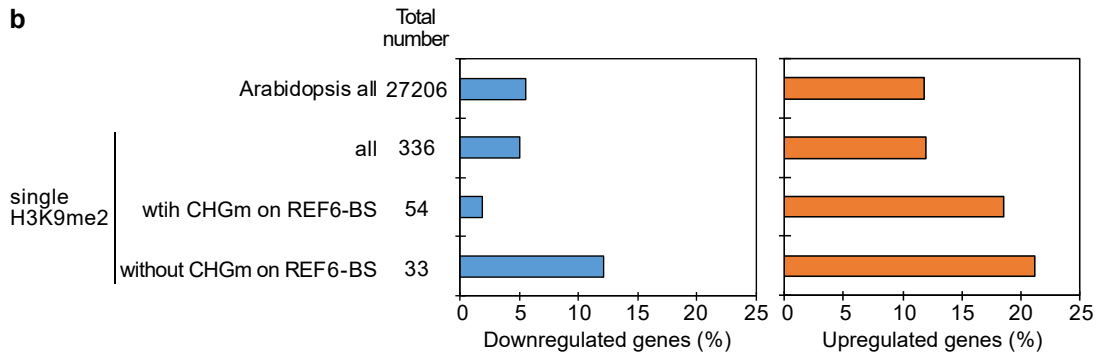

Supplement: supp [file elife-64593-supp-v1.zip › elife_poa_e64593_Figure_7_figure_supplement_2.pdf]

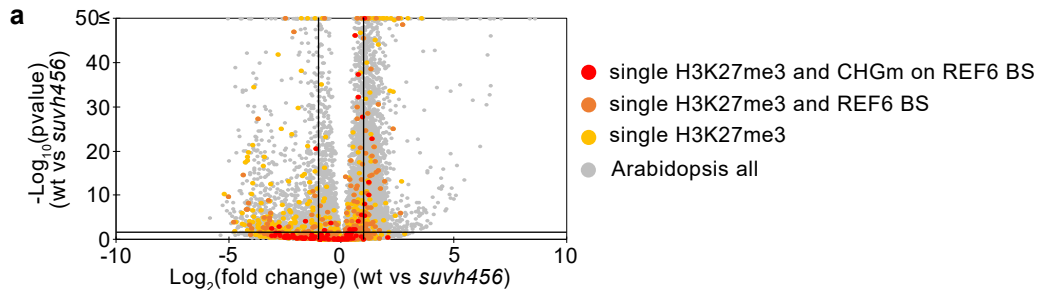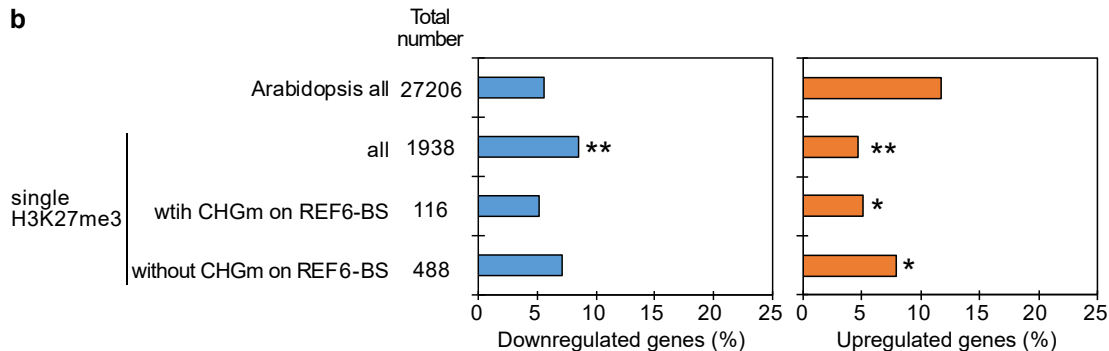

Supplement: supp [file elife-64593-supp-v1.zip › elife_poa_e64593_Figure_7_figure_supplement_4.pdf]

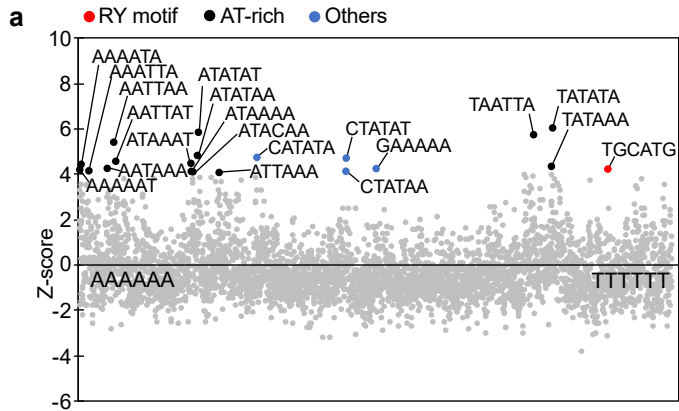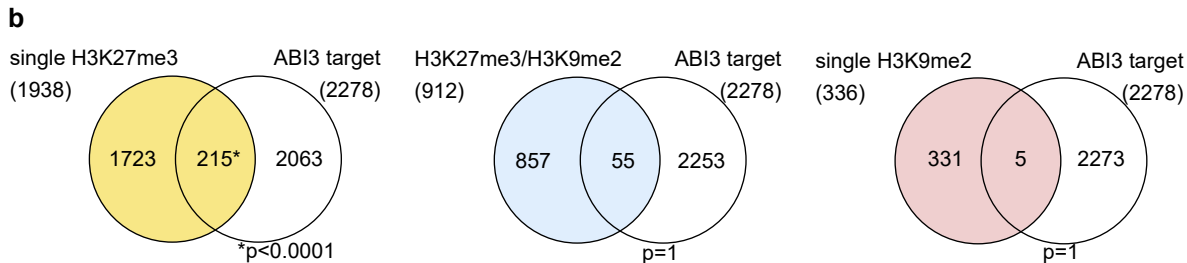

Supplement: supp [file elife-64593-supp-v1.zip › elife_poa_e64593_Figure_7_figure_supplement_5.pdf]

**a**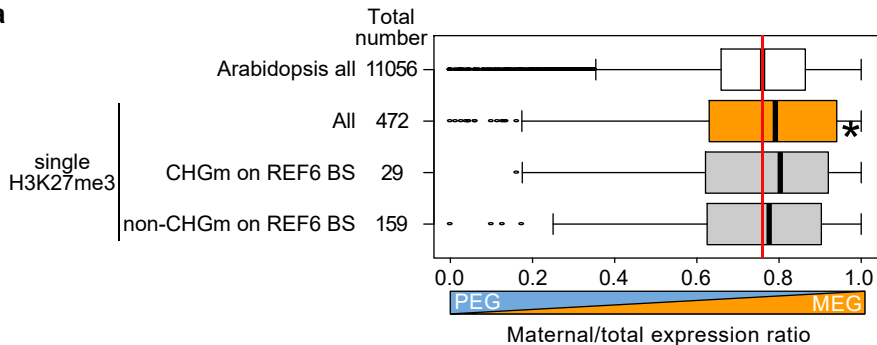**b**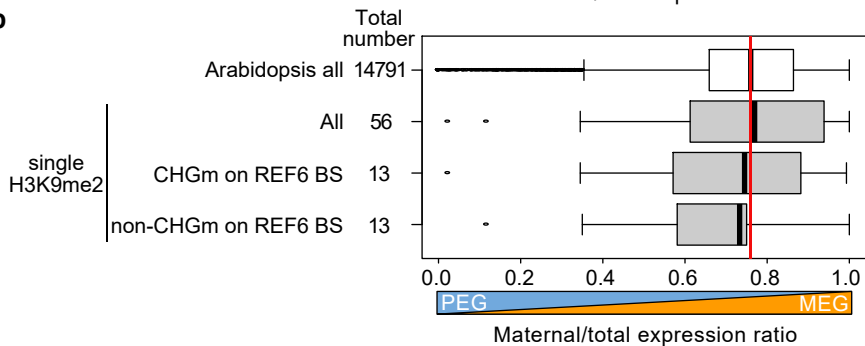

Supplement: supp [file elife-64593-supp-v1.zip › elife_poa_e64593_Figure_8_figure_supplement_1.pdf]

**a**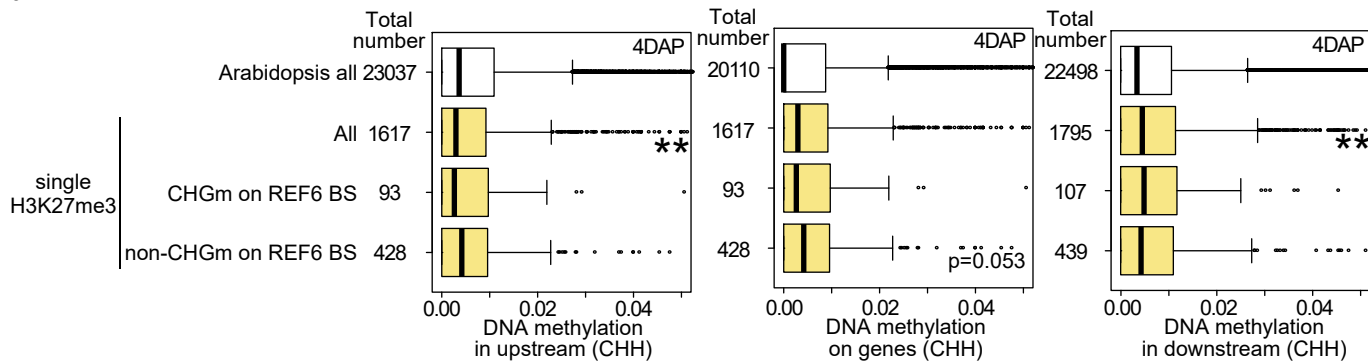**b**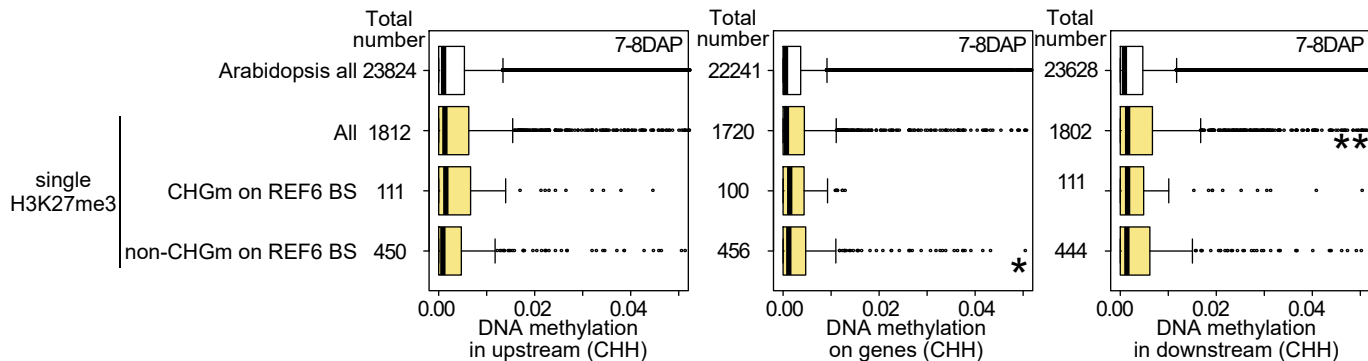

Supplement: supp [file elife-64593-supp-v1.zip › elife_poa_e64593_Figure_8_figure_supplement_2.pdf]

**a**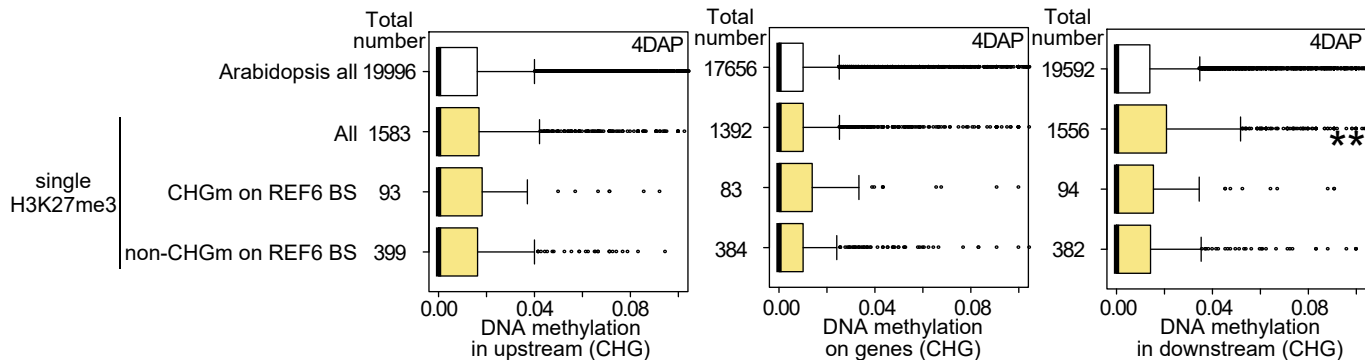**b**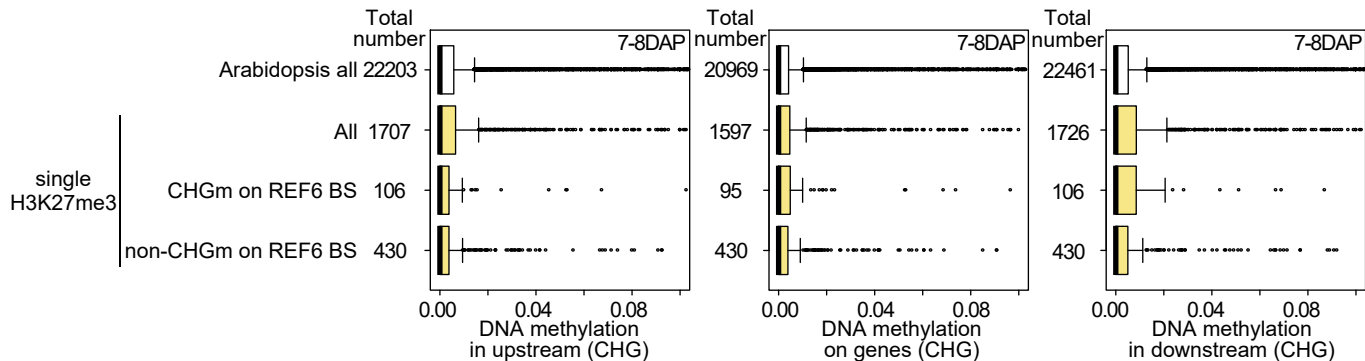

Supplement: supp [file elife-64593-supp-v1.zip › elife_poa_e64593_Figure_8_figure_supplement_3.pdf]

**a**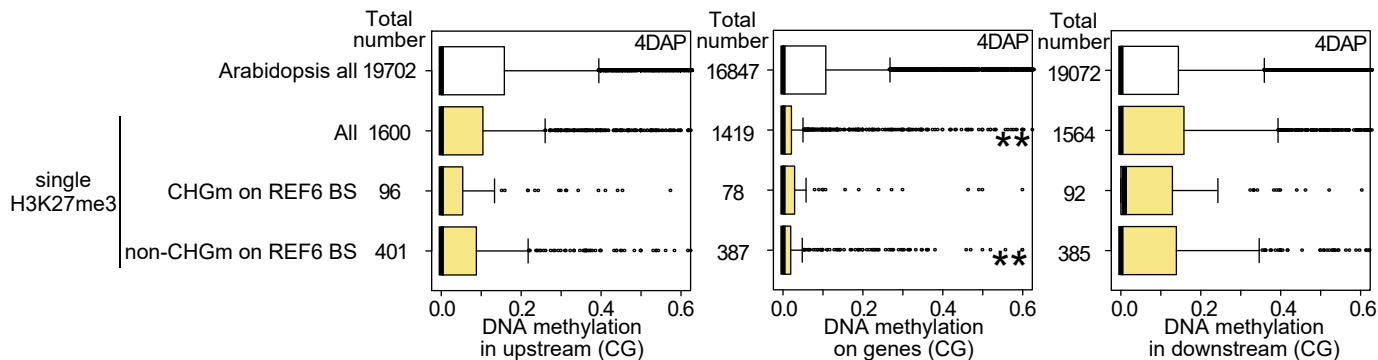**b**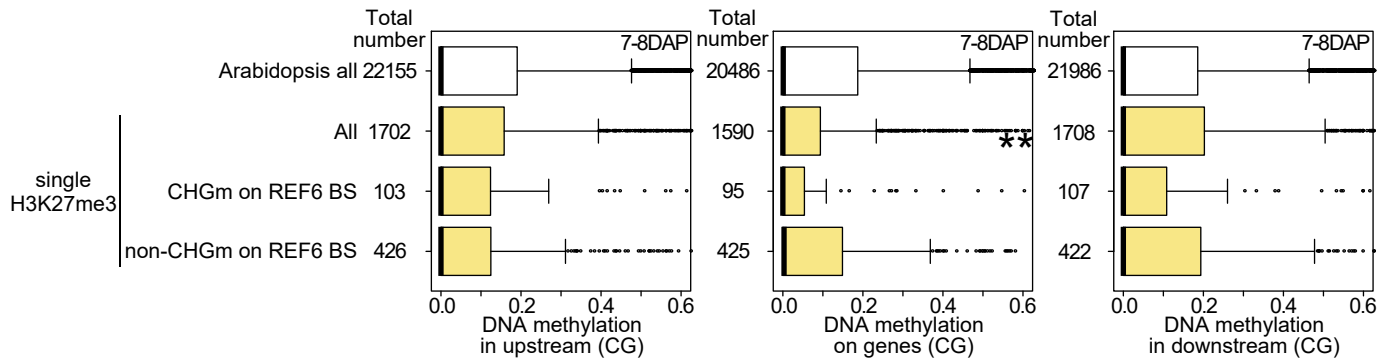

Supplement: supp [file elife-64593-supp-v1.zip › elife_poa_e64593_Figure_8_figure_supplement_4.pdf]
